# Supplementary material for: Refractive index sensing in a monolithic micro-optofluidic lithium niobate chip
Source: Royal Society of Chemistry journal article supplement (doi:10.1039/d5lc00074b), 2025-01-01
Supplement: d5lc00074b1.xlsx [file d5lc00074b1.xlsx]

## Sheet: Sucrose solution preparation
	sn	refractive index (1550nm)	concentration of succrose in solution(%)	concentration of water in solution(%)	Mass of water (g)	Mass of sucrose solution (g)
	0	1.318	0	100	10	0
	1	1.319	0.697972	99.302	10	0.0702878
	2	1.32	1.39215	98.6078	10	0.141181
	3	1.321	2.08275	97.9173	10	0.212705
	4	1.322	2.76979	97.2302	10	0.284869
	5	1.323	3.45331	96.5467	10	0.357683

## Sheet: Refractive index sensing
		Fig.6a			Fig.6b								Fig.6c
		wavelength (nm)	Reflectivity (dB)		wavelength (nm)	Reflectivity (dB)							RI Change (10^(-3))	Minima (nm)	Linear fit (nm)	Error (nm)
		1460	-40.0034			0	0.00697	0.01392	0.02083	0.02769	0.03453		0	1550.46	1550.32	0.10279
		1460.01	-39.9681		1549	-40.587	-37.7	-36	-36.1362	-37.3027	-41.4232		1	1551.41	1551.53	0.10279
		1460.02	-39.9413		1549.01	-40.6205	-37.719	-36.0056	-36.1309	-37.2875	-41.3895		2	1552.69	1552.75	0.10279
		1460.02	-39.9178		1549.02	-40.6543	-37.7382	-36.0113	-36.1257	-37.2724	-41.3558		3	1553.99	1553.96	0.10279
		1460.03	-39.9044		1549.02	-40.6882	-37.7576	-36.0172	-36.1206	-37.2574	-41.3223		4	1555.08	1555.18	0.10279
		1460.04	-39.8943		1549.03	-40.7224	-37.7771	-36.0231	-36.1157	-37.2426	-41.2889		5	1556.51	1556.39	0.10279
		1460.05	-39.8775		1549.04	-40.7567	-37.7968	-36.0292	-36.1108	-37.2278	-41.2557
		1460.06	-39.8691		1549.05	-40.7913	-37.8166	-36.0354	-36.1061	-37.2132	-41.2226
		1460.06	-39.8624		1549.06	-40.826	-37.8366	-36.0417	-36.1014	-37.1987	-41.1896
		1460.07	-39.8641		1549.06	-40.861	-37.8568	-36.0481	-36.0969	-37.1843	-41.1567
		1460.08	-39.8658		1549.07	-40.8961	-37.8771	-36.0546	-36.0925	-37.1701	-41.124
		1460.09	-39.8557		1549.08	-40.9315	-37.8976	-36.0613	-36.0881	-37.1559	-41.0915
		1460.1	-39.8339		1549.09	-40.967	-37.9182	-36.068	-36.0839	-37.1419	-41.0591
		1460.1	-39.7987		1549.1	-41.0028	-37.939	-36.0749	-36.0798	-37.128	-41.0268
		1460.11	-39.7617		1549.1	-41.0387	-37.96	-36.0819	-36.0758	-37.1143	-40.9947
		1460.12	-39.7399		1549.11	-41.0748	-37.9811	-36.0891	-36.0719	-37.1006	-40.9627
		1460.13	-39.7131		1549.12	-41.111	-38.0023	-36.0963	-36.0681	-37.0871	-40.9309
		1460.14	-39.6946		1549.13	-41.1475	-38.0238	-36.1037	-36.0645	-37.0737	-40.8992
		1460.14	-39.6963		1549.14	-41.1841	-38.0453	-36.1111	-36.0609	-37.0605	-40.8677
		1460.15	-39.7081		1549.14	-41.2209	-38.067	-36.1187	-36.0575	-37.0474	-40.8363
		1460.16	-39.7164		1549.15	-41.2579	-38.0889	-36.1264	-36.0541	-37.0344	-40.8051
		1460.17	-39.7215		1549.16	-41.295	-38.1109	-36.1342	-36.0509	-37.0215	-40.7741
		1460.18	-39.7349		1549.17	-41.3323	-38.1331	-36.1422	-36.0478	-37.0088	-40.7432
		1460.18	-39.7433		1549.18	-41.3697	-38.1554	-36.1502	-36.0447	-36.9961	-40.7124
		1460.19	-39.7332		1549.18	-41.4073	-38.1778	-36.1583	-36.0418	-36.9837	-40.6819
		1460.2	-39.7332		1549.19	-41.4451	-38.2004	-36.1666	-36.039	-36.9713	-40.6515
		1460.21	-39.7315		1549.2	-41.4829	-38.2231	-36.175	-36.0363	-36.9591	-40.6212
		1460.22	-39.7047		1549.21	-41.521	-38.2459	-36.1834	-36.0337	-36.9469	-40.5911
		1460.22	-39.6661		1549.22	-41.5591	-38.2689	-36.192	-36.0312	-36.935	-40.5612
		1460.23	-39.6191		1549.22	-41.5974	-38.292	-36.2007	-36.0288	-36.9231	-40.5314
		1460.24	-39.5554		1549.23	-41.6358	-38.3153	-36.2095	-36.0266	-36.9114	-40.5018
		1460.25	-39.4933		1549.24	-41.6743	-38.3387	-36.2184	-36.0244	-36.8998	-40.4724
		1460.26	-39.448		1549.25	-41.713	-38.3622	-36.2274	-36.0223	-36.8883	-40.4431
		1460.26	-39.4245		1549.26	-41.7518	-38.3858	-36.2365	-36.0203	-36.8769	-40.414
		1460.27	-39.3993		1549.26	-41.7906	-38.4096	-36.2457	-36.0185	-36.8657	-40.3851
		1460.28	-39.3742		1549.27	-41.8296	-38.4334	-36.255	-36.0167	-36.8546	-40.3563
		1460.29	-39.3674		1549.28	-41.8687	-38.4574	-36.2644	-36.015	-36.8436	-40.3277
		1460.3	-39.3842		1549.29	-41.9078	-38.4815	-36.2739	-36.0134	-36.8327	-40.2992
		1460.3	-39.3977		1549.3	-41.9471	-38.5057	-36.2834	-36.0119	-36.822	-40.2709
		1460.31	-39.4178		1549.3	-41.9864	-38.5301	-36.2931	-36.0105	-36.8113	-40.2427
		1460.32	-39.4329		1549.31	-42.0258	-38.5545	-36.3029	-36.0092	-36.8008	-40.2148
		1460.33	-39.4362		1549.32	-42.0653	-38.5791	-36.3127	-36.008	-36.7904	-40.1869
		1460.34	-39.4262		1549.33	-42.1048	-38.6037	-36.3227	-36.0069	-36.7801	-40.1593
		1460.34	-39.3977		1549.34	-42.1445	-38.6285	-36.3327	-36.0059	-36.7699	-40.1318
		1460.35	-39.3557		1549.34	-42.1841	-38.6533	-36.3428	-36.005	-36.7599	-40.1044
		1460.36	-39.3037		1549.35	-42.2238	-38.6783	-36.353	-36.0041	-36.7499	-40.0772
		1460.37	-39.2685		1549.36	-42.2636	-38.7033	-36.3633	-36.0033	-36.7401	-40.0501
		1460.38	-39.2366		1549.37	-42.3034	-38.7285	-36.3736	-36.0027	-36.7303	-40.0233
		1460.38	-39.203		1549.38	-42.3433	-38.7537	-36.384	-36.0021	-36.7207	-39.9965
		1460.39	-39.1762		1549.38	-42.3831	-38.779	-36.3945	-36.0015	-36.7111	-39.9699
		1460.4	-39.1661		1549.39	-42.423	-38.8044	-36.4051	-36.0011	-36.7017	-39.9435
		1460.41	-39.1477		1549.4	-42.4629	-38.8299	-36.4158	-36.0007	-36.6924	-39.9172
		1460.42	-39.1275		1549.41	-42.5029	-38.8555	-36.4265	-36.0004	-36.6831	-39.891
		1460.42	-39.1141		1549.42	-42.5428	-38.8812	-36.4373	-36.0002	-36.674	-39.865
		1460.43	-39.1074		1549.42	-42.5827	-38.907	-36.4482	-36.0001	-36.6649	-39.8392
		1460.44	-39.094		1549.43	-42.6227	-38.9328	-36.4591	-36	-36.656	-39.8134
		1460.45	-39.0721		1549.44	-42.6626	-38.9587	-36.4701	-36	-36.6471	-39.7878
		1460.46	-39.0487		1549.45	-42.7025	-38.9847	-36.4812	-36.0001	-36.6383	-39.7624
		1460.46	-39.0151		1549.46	-42.7424	-39.0108	-36.4923	-36.0002	-36.6296	-39.7371
		1460.47	-38.9782		1549.46	-42.7823	-39.0369	-36.5035	-36.0004	-36.621	-39.7119
		1460.48	-38.9413		1549.47	-42.8222	-39.0631	-36.5147	-36.0007	-36.6125	-39.6869
		1460.49	-38.9111		1549.48	-42.862	-39.0894	-36.526	-36.001	-36.6041	-39.662
		1460.5	-38.8591		1549.49	-42.9017	-39.1157	-36.5374	-36.0014	-36.5957	-39.6372
		1460.5	-38.8104		1549.5	-42.9415	-39.1422	-36.5488	-36.0018	-36.5875	-39.6126
		1460.51	-38.7785		1549.5	-42.9812	-39.1687	-36.5603	-36.0023	-36.5793	-39.588
		1460.52	-38.7651		1549.51	-43.0208	-39.1952	-36.5718	-36.0029	-36.5711	-39.5637
		1460.53	-38.7768		1549.52	-43.0603	-39.2218	-36.5834	-36.0035	-36.5631	-39.5394
		1460.54	-38.7886		1549.53	-43.0998	-39.2485	-36.5951	-36.0042	-36.5551	-39.5152
		1460.54	-38.7953		1549.54	-43.1393	-39.2753	-36.6068	-36.0049	-36.5472	-39.4912
		1460.55	-38.8087		1549.54	-43.1786	-39.3021	-36.6185	-36.0057	-36.5394	-39.4673
		1460.56	-38.8171		1549.55	-43.2179	-39.329	-36.6303	-36.0065	-36.5316	-39.4435
		1460.57	-38.8121		1549.56	-43.2571	-39.356	-36.6422	-36.0074	-36.5239	-39.4198
		1460.58	-38.7987		1549.57	-43.2962	-39.383	-36.6541	-36.0083	-36.5162	-39.3963
		1460.58	-38.7634		1549.58	-43.3352	-39.4101	-36.666	-36.0092	-36.5087	-39.3728
		1460.59	-38.7181		1549.58	-43.3741	-39.4372	-36.6781	-36.0103	-36.5011	-39.3495
		1460.6	-38.6829		1549.59	-43.4128	-39.4645	-36.6901	-36.0113	-36.4937	-39.3262
		1460.61	-38.6477		1549.6	-43.4515	-39.4917	-36.7022	-36.0124	-36.4863	-39.3031
		1460.62	-38.6275		1549.61	-43.4901	-39.5191	-36.7143	-36.0136	-36.4789	-39.2801
		1460.62	-38.599		1549.62	-43.5285	-39.5465	-36.7265	-36.0147	-36.4716	-39.2572
		1460.63	-38.5604		1549.62	-43.5669	-39.574	-36.7388	-36.016	-36.4644	-39.2344
		1460.64	-38.5268		1549.63	-43.605	-39.6015	-36.7511	-36.0172	-36.4572	-39.2116
		1460.65	-38.5067		1549.64	-43.6431	-39.6291	-36.7634	-36.0186	-36.45	-39.189
		1460.66	-38.5017		1549.65	-43.681	-39.6568	-36.7758	-36.0199	-36.443	-39.1665
		1460.66	-38.5134		1549.66	-43.7188	-39.6846	-36.7882	-36.0213	-36.4359	-39.1441
		1460.67	-38.5419		1549.66	-43.7564	-39.7124	-36.8007	-36.0227	-36.4289	-39.1218
		1460.68	-38.5688		1549.67	-43.7939	-39.7403	-36.8133	-36.0242	-36.422	-39.0995
		1460.69	-38.5889		1549.68	-43.8312	-39.7682	-36.8258	-36.0257	-36.4151	-39.0774
		1460.7	-38.6057		1549.69	-43.8683	-39.7963	-36.8385	-36.0272	-36.4082	-39.0553
		1460.7	-38.6074		1549.7	-43.9053	-39.8244	-36.8511	-36.0288	-36.4014	-39.0334
		1460.71	-38.5906		1549.7	-43.9421	-39.8526	-36.8639	-36.0304	-36.3947	-39.0115
		1460.72	-38.5671		1549.71	-43.9788	-39.8809	-36.8767	-36.0321	-36.388	-38.9897
		1460.73	-38.5218		1549.72	-44.0152	-39.9092	-36.8895	-36.0338	-36.3813	-38.968
		1460.74	-38.4597		1549.73	-44.0515	-39.9376	-36.9024	-36.0355	-36.3746	-38.9464
		1460.74	-38.4128		1549.74	-44.0876	-39.9661	-36.9153	-36.0372	-36.368	-38.9249
		1460.75	-38.3691		1549.74	-44.1235	-39.9947	-36.9283	-36.039	-36.3615	-38.9034
		1460.76	-38.3238		1549.75	-44.1591	-40.0234	-36.9414	-36.0409	-36.355	-38.8821
		1460.77	-38.2819		1549.76	-44.1946	-40.0522	-36.9545	-36.0427	-36.3485	-38.8608
		1460.78	-38.245		1549.77	-44.2299	-40.0811	-36.9676	-36.0446	-36.3421	-38.8396
		1460.78	-38.2517		1549.78	-44.265	-40.11	-36.9808	-36.0466	-36.3357	-38.8185
		1460.79	-38.2718		1549.78	-44.2998	-40.1391	-36.9941	-36.0486	-36.3294	-38.7975
		1460.8	-38.2987		1549.79	-44.3345	-40.1682	-37.0074	-36.0506	-36.323	-38.7765
		1460.81	-38.3289		1549.8	-44.3689	-40.1975	-37.0208	-36.0526	-36.3168	-38.7556
		1460.82	-38.3725		1549.81	-44.4031	-40.2268	-37.0343	-36.0547	-36.3105	-38.7348
		1460.82	-38.4161		1549.82	-44.437	-40.2563	-37.0478	-36.0569	-36.3044	-38.7141
		1460.83	-38.448		1549.82	-44.4707	-40.2858	-37.0614	-36.0591	-36.2982	-38.6934
		1460.84	-38.4782		1549.83	-44.5042	-40.3155	-37.0751	-36.0613	-36.2921	-38.6729
		1460.85	-38.4933		1549.84	-44.5374	-40.3453	-37.0888	-36.0635	-36.286	-38.6524
		1460.86	-38.4933		1549.85	-44.5704	-40.3751	-37.1026	-36.0658	-36.28	-38.632
		1460.86	-38.4698		1549.86	-44.6031	-40.4051	-37.1164	-36.0682	-36.274	-38.6116
		1460.87	-38.4346		1549.86	-44.6356	-40.4352	-37.1304	-36.0706	-36.2681	-38.5914
		1460.88	-38.3758		1549.87	-44.6678	-40.4655	-37.1444	-36.073	-36.2622	-38.5712
		1460.89	-38.2953		1549.88	-44.6997	-40.4958	-37.1585	-36.0755	-36.2564	-38.551
		1460.9	-38.2164		1549.89	-44.7314	-40.5263	-37.1726	-36.078	-36.2505	-38.531
		1460.9	-38.1594		1549.9	-44.7627	-40.5569	-37.1869	-36.0806	-36.2448	-38.511
		1460.91	-38.1359		1549.9	-44.7938	-40.5876	-37.2012	-36.0832	-36.2391	-38.4912
		1460.92	-38.1174		1549.91	-44.8247	-40.6185	-37.2156	-36.0859	-36.2334	-38.4713
		1460.93	-38.1057		1549.92	-44.8552	-40.6494	-37.23	-36.0886	-36.2278	-38.4516
		1460.94	-38.0973		1549.93	-44.8854	-40.6806	-37.2446	-36.0914	-36.2222	-38.4319
		1460.94	-38.0839		1549.94	-44.9153	-40.7118	-37.2592	-36.0942	-36.2167	-38.4124
		1460.95	-38.0688		1549.94	-44.945	-40.7432	-37.274	-36.0971	-36.2112	-38.3928
		1460.96	-38.0688		1549.95	-44.9743	-40.7747	-37.2888	-36.1001	-36.2058	-38.3734
		1460.97	-38.0654		1549.96	-45.0033	-40.8064	-37.3037	-36.103	-36.2004	-38.3541
		1460.98	-38.052		1549.97	-45.032	-40.8382	-37.3187	-36.1061	-36.1951	-38.3348
		1460.98	-38.0319		1549.98	-45.0604	-40.8701	-37.3338	-36.1092	-36.1898	-38.3156
		1460.99	-38.0151		1549.98	-45.0884	-40.9022	-37.349	-36.1124	-36.1846	-38.2965
		1461	-37.995		1549.99	-45.1161	-40.9344	-37.3643	-36.1156	-36.1794	-38.2774
		1461.01	-37.9765		1550	-45.1435	-40.9668	-37.3796	-36.1189	-36.1743	-38.2585
		1461.02	-37.9547		1550.01	-45.1706	-40.9994	-37.3951	-36.1222	-36.1692	-38.2396
		1461.02	-37.9295		1550.02	-45.1973	-41.032	-37.4107	-36.1256	-36.1642	-38.2208
		1461.03	-37.9044		1550.02	-45.2236	-41.0649	-37.4264	-36.1291	-36.1593	-38.2021
		1461.04	-37.8859		1550.03	-45.2496	-41.0978	-37.4421	-36.1327	-36.1544	-38.1834
		1461.05	-37.8658		1550.04	-45.2752	-41.131	-37.458	-36.1363	-36.1496	-38.1649
		1461.06	-37.844		1550.05	-45.3005	-41.1643	-37.474	-36.1399	-36.1449	-38.1464
		1461.06	-37.8305		1550.06	-45.3254	-41.1977	-37.4901	-36.1437	-36.1402	-38.128
		1461.07	-37.8121		1550.06	-45.35	-41.2313	-37.5063	-36.1475	-36.1356	-38.1097
		1461.08	-37.7936		1550.07	-45.3741	-41.265	-37.5226	-36.1514	-36.131	-38.0915
		1461.09	-37.7617		1550.08	-45.3979	-41.2989	-37.539	-36.1554	-36.1265	-38.0734
		1461.1	-37.7064		1550.09	-45.4213	-41.333	-37.5555	-36.1594	-36.1221	-38.0553
		1461.1	-37.6493		1550.1	-45.4443	-41.3672	-37.5722	-36.1635	-36.1177	-38.0374
		1461.11	-37.5956		1550.1	-45.4669	-41.4015	-37.5889	-36.1677	-36.1134	-38.0195
		1461.12	-37.5285		1550.11	-45.4891	-41.436	-37.6057	-36.1719	-36.1092	-38.0018
		1461.13	-37.4664		1550.12	-45.5108	-41.4707	-37.6227	-36.1763	-36.1051	-37.9841
		1461.14	-37.4211		1550.13	-45.5322	-41.5055	-37.6398	-36.1807	-36.101	-37.9665
		1461.14	-37.3792		1550.14	-45.5532	-41.5405	-37.657	-36.1852	-36.097	-37.949
		1461.15	-37.349		1550.14	-45.5737	-41.5756	-37.6743	-36.1898	-36.0931	-37.9316
		1461.16	-37.3473		1550.15	-45.5938	-41.6109	-37.6917	-36.1944	-36.0892	-37.9143
		1461.17	-37.3624		1550.16	-45.6135	-41.6463	-37.7093	-36.1991	-36.0854	-37.897
		1461.18	-37.3842		1550.17	-45.6328	-41.6818	-37.7269	-36.2039	-36.0817	-37.8799
		1461.18	-37.4144		1550.18	-45.6516	-41.7175	-37.7447	-36.2088	-36.0781	-37.8629
		1461.19	-37.4413		1550.18	-45.6699	-41.7533	-37.7626	-36.2138	-36.0746	-37.846
		1461.2	-37.4631		1550.19	-45.6879	-41.7893	-37.7806	-36.2189	-36.0711	-37.8291
		1461.21	-37.4799		1550.2	-45.7053	-41.8254	-37.7987	-36.224	-36.0677	-37.8124
		1461.22	-37.5017		1550.21	-45.7223	-41.8617	-37.817	-36.2292	-36.0644	-37.7958
		1461.22	-37.5252		1550.22	-45.7389	-41.8981	-37.8353	-36.2346	-36.0612	-37.7792
		1461.23	-37.5352		1550.22	-45.7549	-41.9346	-37.8538	-36.24	-36.058	-37.7628
		1461.24	-37.5268		1550.23	-45.7705	-41.9713	-37.8724	-36.2454	-36.055	-37.7465
		1461.25	-37.5235		1550.24	-45.7857	-42.008	-37.8911	-36.251	-36.052	-37.7302
		1461.26	-37.5168		1550.25	-45.8003	-42.0449	-37.9099	-36.2567	-36.0491	-37.7141
		1461.26	-37.4966		1550.26	-45.8145	-42.0819	-37.9289	-36.2624	-36.0462	-37.6981
		1461.27	-37.4597		1550.26	-45.8281	-42.1191	-37.948	-36.2682	-36.0435	-37.6822
		1461.28	-37.4379		1550.27	-45.8413	-42.1563	-37.9672	-36.2742	-36.0408	-37.6664
		1461.29	-37.4279		1550.28	-45.854	-42.1937	-37.9865	-36.2802	-36.0383	-37.6506
		1461.3	-37.4245		1550.29	-45.8661	-42.2311	-38.0059	-36.2863	-36.0358	-37.635
		1461.3	-37.4245		1550.3	-45.8778	-42.2687	-38.0254	-36.2924	-36.0334	-37.6195
		1461.31	-37.4262		1550.3	-45.889	-42.3063	-38.0451	-36.2987	-36.0311	-37.6041
		1461.32	-37.4262		1550.31	-45.8996	-42.3441	-38.0648	-36.3051	-36.0288	-37.5889
		1461.33	-37.4262		1550.32	-45.9097	-42.3819	-38.0847	-36.3115	-36.0267	-37.5737
		1461.34	-37.4178		1550.33	-45.9193	-42.4198	-38.1047	-36.318	-36.0246	-37.5586
		1461.34	-37.4161		1550.34	-45.9284	-42.4578	-38.1249	-36.3247	-36.0227	-37.5436
		1461.35	-37.4245		1550.34	-45.937	-42.4959	-38.1451	-36.3314	-36.0208	-37.5288
		1461.36	-37.4346		1550.35	-45.945	-42.5341	-38.1654	-36.3381	-36.019	-37.514
		1461.37	-37.4262		1550.36	-45.9525	-42.5723	-38.1859	-36.345	-36.0172	-37.4994
		1461.38	-37.4094		1550.37	-45.9594	-42.6106	-38.2065	-36.352	-36.0156	-37.4849
		1461.38	-37.3876		1550.38	-45.9658	-42.6489	-38.2271	-36.359	-36.014	-37.4704
		1461.39	-37.3658		1550.38	-45.9717	-42.6873	-38.2479	-36.3662	-36.0126	-37.4561
		1461.4	-37.3473		1550.39	-45.977	-42.7257	-38.2688	-36.3734	-36.0112	-37.4419
		1461.41	-37.3473		1550.4	-45.9818	-42.7642	-38.2898	-36.3807	-36.0099	-37.4278
		1461.42	-37.3473		1550.41	-45.986	-42.8027	-38.3109	-36.3881	-36.0086	-37.4138
		1461.42	-37.344		1550.42	-45.9897	-42.8413	-38.3322	-36.3956	-36.0075	-37.4
		1461.43	-37.3389		1550.42	-45.9928	-42.8798	-38.3535	-36.4031	-36.0065	-37.3862
		1461.44	-37.3322		1550.43	-45.9954	-42.9184	-38.3749	-36.4107	-36.0055	-37.3725
		1461.45	-37.3272		1550.44	-45.9974	-42.957	-38.3965	-36.4185	-36.0046	-37.359
		1461.46	-37.3205		1550.45	-45.9988	-42.9956	-38.4181	-36.4263	-36.0038	-37.3455
		1461.46	-37.3272		1550.46	-45.9997	-43.0342	-38.4399	-36.4342	-36.003	-37.3322
		1461.47	-37.3456		1550.46	-46	-43.0728	-38.4617	-36.4421	-36.0024	-37.319
		1461.48	-37.3456		1550.47	-45.9997	-43.1114	-38.4837	-36.4502	-36.0018	-37.3058
		1461.49	-37.3188		1550.48	-45.9989	-43.15	-38.5057	-36.4583	-36.0013	-37.2928
		1461.5	-37.2919		1550.49	-45.9976	-43.1885	-38.5279	-36.4665	-36.0009	-37.2799
		1461.5	-37.2601		1550.5	-45.9956	-43.227	-38.5501	-36.4748	-36.0006	-37.2671
		1461.51	-37.2215		1550.5	-45.9931	-43.2655	-38.5725	-36.4831	-36.0003	-37.2544
		1461.52	-37.1829		1550.51	-45.99	-43.3039	-38.5949	-36.4915	-36.0001	-37.2418
		1461.53	-37.1711		1550.52	-45.9864	-43.3423	-38.6175	-36.5	-36	-37.2293
		1461.54	-37.1812		1550.53	-45.9821	-43.3807	-38.6401	-36.5086	-36	-37.2169
		1461.54	-37.1896		1550.54	-45.9774	-43.4189	-38.6628	-36.5173	-36	-37.2046
		1461.55	-37.1829		1550.54	-45.972	-43.4572	-38.6856	-36.526	-36.0002	-37.1924
		1461.56	-37.1862		1550.55	-45.9661	-43.4953	-38.7085	-36.5348	-36.0003	-37.1804
		1461.57	-37.198		1550.56	-45.9596	-43.5333	-38.7315	-36.5437	-36.0006	-37.1684
		1461.58	-37.2114		1550.57	-45.9526	-43.5713	-38.7546	-36.5526	-36.0009	-37.1565
		1461.58	-37.2282		1550.58	-45.945	-43.6092	-38.7778	-36.5616	-36.0013	-37.1447
		1461.59	-37.2315		1550.58	-45.9368	-43.647	-38.8011	-36.5707	-36.0018	-37.133
		1461.6	-37.2315		1550.59	-45.9281	-43.6847	-38.8244	-36.5799	-36.0023	-37.1214
		1461.61	-37.2215		1550.6	-45.9188	-43.7222	-38.8479	-36.5891	-36.0029	-37.1099
		1461.62	-37.198		1550.61	-45.909	-43.7597	-38.8714	-36.5983	-36.0036	-37.0985
		1461.62	-37.1628		1550.62	-45.8986	-43.797	-38.895	-36.6077	-36.0043	-37.0872
		1461.63	-37.1292		1550.62	-45.8876	-43.8342	-38.9187	-36.6171	-36.0051	-37.076
		1461.64	-37.0973		1550.63	-45.8761	-43.8712	-38.9425	-36.6266	-36.006	-37.0649
		1461.65	-37.057		1550.64	-45.8641	-43.9082	-38.9663	-36.6361	-36.0069	-37.0539
		1461.66	-37.0218		1550.65	-45.8515	-43.9449	-38.9903	-36.6457	-36.0079	-37.0429
		1461.66	-36.9966		1550.66	-45.8384	-43.9815	-39.0143	-36.6554	-36.009	-37.0321
		1461.67	-36.9832		1550.66	-45.8248	-44.018	-39.0384	-36.6651	-36.0101	-37.0213
		1461.68	-36.9765		1550.67	-45.8106	-44.0543	-39.0626	-36.6749	-36.0112	-37.0106
		1461.69	-36.9681		1550.68	-45.7959	-44.0904	-39.0868	-36.6847	-36.0125	-37.0001
		1461.7	-36.9664		1550.69	-45.7806	-44.1263	-39.1112	-36.6946	-36.0137	-36.9896
		1461.7	-36.9732		1550.7	-45.7649	-44.1621	-39.1356	-36.7046	-36.0151	-36.9791
		1461.71	-36.9849		1550.7	-45.7486	-44.1976	-39.1601	-36.7146	-36.0165	-36.9688
		1461.72	-36.9782		1550.71	-45.7318	-44.233	-39.1846	-36.7246	-36.0179	-36.9586
		1461.73	-36.9732		1550.72	-45.7146	-44.2681	-39.2093	-36.7348	-36.0194	-36.9484
		1461.74	-36.9765		1550.73	-45.6968	-44.3031	-39.234	-36.7449	-36.021	-36.9383
		1461.74	-36.9547		1550.74	-45.6785	-44.3378	-39.2588	-36.7552	-36.0226	-36.9283
		1461.75	-36.9362		1550.74	-45.6597	-44.3723	-39.2837	-36.7654	-36.0243	-36.9183
		1461.76	-36.9295		1550.75	-45.6404	-44.4066	-39.3086	-36.7758	-36.026	-36.9085
		1461.77	-36.9211		1550.76	-45.6207	-44.4406	-39.3336	-36.7862	-36.0278	-36.8987
		1461.78	-36.9027		1550.77	-45.6005	-44.4745	-39.3587	-36.7966	-36.0296	-36.889
		1461.78	-36.8809		1550.78	-45.5798	-44.508	-39.3839	-36.8071	-36.0314	-36.8794
		1461.79	-36.8557		1550.78	-45.5586	-44.5414	-39.4091	-36.8176	-36.0333	-36.8698
		1461.8	-36.8406		1550.79	-45.537	-44.5744	-39.4344	-36.8282	-36.0353	-36.8603
		1461.81	-36.8322		1550.8	-45.515	-44.6072	-39.4598	-36.8388	-36.0373	-36.8509
		1461.82	-36.8406		1550.81	-45.4925	-44.6398	-39.4853	-36.8495	-36.0394	-36.8415
		1461.82	-36.8523		1550.82	-45.4695	-44.6721	-39.5108	-36.8603	-36.0414	-36.8322
		1461.83	-36.8406		1550.82	-45.4461	-44.7041	-39.5364	-36.871	-36.0436	-36.823
		1461.84	-36.8138		1550.83	-45.4223	-44.7358	-39.5621	-36.8819	-36.0458	-36.8138
		1461.85	-36.8054		1550.84	-45.3981	-44.7672	-39.5878	-36.8927	-36.048	-36.8047
		1461.86	-36.797		1550.85	-45.3735	-44.7984	-39.6136	-36.9037	-36.0503	-36.7957
		1461.86	-36.7651		1550.86	-45.3484	-44.8292	-39.6395	-36.9146	-36.0526	-36.7867
		1461.87	-36.7332		1550.86	-45.323	-44.8598	-39.6655	-36.9256	-36.0549	-36.7778
		1461.88	-36.6862		1550.87	-45.2972	-44.89	-39.6915	-36.9367	-36.0573	-36.769
		1461.89	-36.6326		1550.88	-45.271	-44.9199	-39.7176	-36.9478	-36.0597	-36.7602
		1461.9	-36.594		1550.89	-45.2444	-44.9496	-39.7438	-36.9589	-36.0622	-36.7515
		1461.9	-36.5654		1550.9	-45.2174	-44.9789	-39.77	-36.9701	-36.0647	-36.7428
		1461.91	-36.5419		1550.9	-45.1901	-45.0078	-39.7964	-36.9814	-36.0673	-36.7342
		1461.92	-36.5285		1550.91	-45.1624	-45.0365	-39.8227	-36.9926	-36.0699	-36.7256
		1461.93	-36.5252		1550.92	-45.1344	-45.0648	-39.8492	-37.004	-36.0725	-36.7171
		1461.94	-36.5403		1550.93	-45.1061	-45.0928	-39.8757	-37.0153	-36.0751	-36.7087
		1461.94	-36.5654		1550.94	-45.0774	-45.1204	-39.9024	-37.0267	-36.0778	-36.7003
		1461.95	-36.5856		1550.94	-45.0484	-45.1477	-39.929	-37.0382	-36.0806	-36.6919
		1461.96	-36.6057		1550.95	-45.019	-45.1746	-39.9558	-37.0497	-36.0833	-36.6836
		1461.97	-36.6242		1550.96	-44.9894	-45.2012	-39.9826	-37.0612	-36.0862	-36.6754
		1461.98	-36.646		1550.97	-44.9595	-45.2274	-40.0095	-37.0728	-36.089	-36.6672
		1461.98	-36.6628		1550.98	-44.9292	-45.2532	-40.0365	-37.0845	-36.0919	-36.659
		1461.99	-36.6795		1550.98	-44.8987	-45.2787	-40.0636	-37.0961	-36.0948	-36.6509
		1462	-36.6913		1550.99	-44.8679	-45.3038	-40.0907	-37.1078	-36.0978	-36.6429
		1462.01	-36.6879		1551	-44.8368	-45.3285	-40.1179	-37.1196	-36.1007	-36.6349
		1462.02	-36.6678		1551.01	-44.8055	-45.3529	-40.1452	-37.1314	-36.1038	-36.6269
		1462.02	-36.6493		1551.02	-44.7739	-45.3768	-40.1726	-37.1433	-36.1068	-36.619
		1462.03	-36.6242		1551.02	-44.7421	-45.4004	-40.2	-37.1552	-36.1099	-36.6111
		1462.04	-36.5973		1551.03	-44.71	-45.4236	-40.2275	-37.1671	-36.113	-36.6033
		1462.05	-36.5923		1551.04	-44.6777	-45.4463	-40.2551	-37.1791	-36.1162	-36.5955
		1462.06	-36.5923		1551.05	-44.6452	-45.4687	-40.2828	-37.1911	-36.1194	-36.5878
		1462.06	-36.6091		1551.06	-44.6125	-45.4907	-40.3106	-37.2032	-36.1226	-36.5801
		1462.07	-36.6174		1551.06	-44.5795	-45.5122	-40.3384	-37.2153	-36.1259	-36.5725
		1462.08	-36.6124		1551.07	-44.5464	-45.5334	-40.3663	-37.2275	-36.1292	-36.5648
		1462.09	-36.6225		1551.08	-44.513	-45.5541	-40.3943	-37.2397	-36.1325	-36.5573
		1462.1	-36.6309		1551.09	-44.4795	-45.5744	-40.4224	-37.252	-36.1359	-36.5498
		1462.1	-36.6309		1551.1	-44.4457	-45.5942	-40.4506	-37.2643	-36.1393	-36.5423
		1462.11	-36.6174		1551.1	-44.4119	-45.6137	-40.4788	-37.2767	-36.1428	-36.5348
		1462.12	-36.5973		1551.11	-44.3778	-45.6327	-40.5071	-37.2891	-36.1462	-36.5274
		1462.13	-36.5755		1551.12	-44.3436	-45.6512	-40.5356	-37.3016	-36.1498	-36.5201
		1462.14	-36.5621		1551.13	-44.3092	-45.6693	-40.5641	-37.3141	-36.1533	-36.5128
		1462.14	-36.5419		1551.14	-44.2747	-45.687	-40.5926	-37.3267	-36.1569	-36.5055
		1462.15	-36.5101		1551.14	-44.24	-45.7042	-40.6213	-37.3393	-36.1605	-36.4982
		1462.16	-36.4966		1551.15	-44.2052	-45.721	-40.6501	-37.352	-36.1642	-36.491
		1462.17	-36.4916		1551.16	-44.1703	-45.7373	-40.6789	-37.3647	-36.1679	-36.4839
		1462.18	-36.4983		1551.17	-44.1353	-45.7532	-40.7079	-37.3775	-36.1716	-36.4768
		1462.18	-36.5117		1551.18	-44.1002	-45.7686	-40.7369	-37.3904	-36.1754	-36.4697
		1462.19	-36.5386		1551.18	-44.0649	-45.7835	-40.766	-37.4033	-36.1792	-36.4626
		1462.2	-36.5587		1551.19	-44.0296	-45.798	-40.7953	-37.4162	-36.1831	-36.4556
		1462.21	-36.5721		1551.2	-43.9941	-45.8119	-40.8246	-37.4292	-36.187	-36.4487
		1462.22	-36.5923		1551.21	-43.9586	-45.8254	-40.854	-37.4423	-36.1909	-36.4418
		1462.22	-36.6191		1551.22	-43.923	-45.8385	-40.8835	-37.4554	-36.1949	-36.4349
		1462.23	-36.646		1551.22	-43.8873	-45.851	-40.9131	-37.4686	-36.1989	-36.428
		1462.24	-36.6611		1551.23	-43.8515	-45.8631	-40.9428	-37.4819	-36.203	-36.4212
		1462.25	-36.6678		1551.24	-43.8157	-45.8746	-40.9725	-37.4952	-36.2071	-36.4145
		1462.26	-36.6745		1551.25	-43.7798	-45.8857	-41.0024	-37.5086	-36.2112	-36.4078
		1462.26	-36.651		1551.26	-43.7438	-45.8963	-41.0324	-37.522	-36.2154	-36.4011
		1462.27	-36.6124		1551.26	-43.7078	-45.9064	-41.0625	-37.5356	-36.2196	-36.3944
		1462.28	-36.5839		1551.27	-43.6718	-45.9159	-41.0927	-37.5491	-36.2239	-36.3878
		1462.29	-36.5503		1551.28	-43.6357	-45.925	-41.123	-37.5628	-36.2282	-36.3813
		1462.3	-36.5235		1551.29	-43.5996	-45.9336	-41.1533	-37.5765	-36.2326	-36.3747
		1462.3	-36.5084		1551.3	-43.5634	-45.9416	-41.1838	-37.5903	-36.237	-36.3683
		1462.31	-36.5017		1551.3	-43.5272	-45.9492	-41.2144	-37.6042	-36.2415	-36.3618
		1462.32	-36.4933		1551.31	-43.491	-45.9562	-41.2451	-37.6181	-36.246	-36.3554
		1462.33	-36.4748		1551.32	-43.4548	-45.9627	-41.2759	-37.6321	-36.2505	-36.3491
		1462.34	-36.453		1551.33	-43.4186	-45.9687	-41.3068	-37.6462	-36.2552	-36.3428
		1462.34	-36.443		1551.34	-43.3823	-45.9742	-41.3378	-37.6603	-36.2598	-36.3365
		1462.35	-36.4362		1551.34	-43.3461	-45.9792	-41.3689	-37.6746	-36.2645	-36.3303
		1462.36	-36.4379		1551.35	-43.3098	-45.9836	-41.4001	-37.6889	-36.2693	-36.3241
		1462.37	-36.4279		1551.36	-43.2736	-45.9875	-41.4315	-37.7033	-36.2741	-36.3179
		1462.38	-36.3993		1551.37	-43.2374	-45.9909	-41.4629	-37.7178	-36.279	-36.3118
		1462.38	-36.3809		1551.38	-43.2011	-45.9937	-41.4944	-37.7323	-36.2839	-36.3058
		1462.39	-36.3742		1551.38	-43.1649	-45.9961	-41.5261	-37.747	-36.2889	-36.2998
		1462.4	-36.3641		1551.39	-43.1287	-45.9979	-41.5578	-37.7617	-36.2939	-36.2938
		1462.41	-36.3607		1551.4	-43.0925	-45.9991	-41.5897	-37.7765	-36.299	-36.2879
		1462.42	-36.349		1551.41	-43.0564	-45.9998	-41.6217	-37.7914	-36.3041	-36.282
		1462.42	-36.3289		1551.42	-43.0202	-46	-41.6538	-37.8064	-36.3093	-36.2762
		1462.43	-36.3221		1551.42	-42.9841	-45.9996	-41.686	-37.8215	-36.3146	-36.2704
		1462.44	-36.3289		1551.43	-42.9481	-45.9988	-41.7183	-37.8366	-36.3199	-36.2647
		1462.45	-36.3372		1551.44	-42.912	-45.9973	-41.7507	-37.8519	-36.3253	-36.259
		1462.46	-36.349		1551.45	-42.876	-45.9953	-41.7833	-37.8672	-36.3307	-36.2534
		1462.46	-36.3658		1551.46	-42.8401	-45.9928	-41.8159	-37.8827	-36.3362	-36.2478
		1462.47	-36.3758		1551.46	-42.8042	-45.9898	-41.8487	-37.8982	-36.3418	-36.2423
		1462.48	-36.3826		1551.47	-42.7683	-45.9862	-41.8816	-37.9139	-36.3474	-36.2368
		1462.49	-36.3926		1551.48	-42.7325	-45.9821	-41.9146	-37.9296	-36.3531	-36.2314
		1462.5	-36.3842		1551.49	-42.6967	-45.9774	-41.9477	-37.9454	-36.3589	-36.226
		1462.5	-36.3641		1551.5	-42.661	-45.9722	-41.9809	-37.9614	-36.3647	-36.2207
		1462.51	-36.3255		1551.5	-42.6253	-45.9665	-42.0142	-37.9774	-36.3706	-36.2154
		1462.52	-36.2768		1551.51	-42.5897	-45.9602	-42.0476	-37.9936	-36.3766	-36.2102
		1462.53	-36.2349		1551.52	-42.5542	-45.9534	-42.0812	-38.0098	-36.3826	-36.205
		1462.54	-36.1896		1551.53	-42.5187	-45.946	-42.1148	-38.0261	-36.3887	-36.1999
		1462.54	-36.1644		1551.54	-42.4832	-45.9381	-42.1486	-38.0426	-36.3949	-36.1948
		1462.55	-36.1644		1551.54	-42.4479	-45.9297	-42.1824	-38.0592	-36.4011	-36.1898
		1462.56	-36.1577		1551.55	-42.4126	-45.9208	-42.2164	-38.0758	-36.4074	-36.1848
		1462.57	-36.1443		1551.56	-42.3773	-45.9113	-42.2505	-38.0926	-36.4138	-36.1799
		1462.58	-36.151		1551.57	-42.3422	-45.9013	-42.2847	-38.1095	-36.4203	-36.1751
		1462.58	-36.156		1551.58	-42.3071	-45.8908	-42.319	-38.1265	-36.4268	-36.1703
		1462.59	-36.1409		1551.58	-42.2721	-45.8797	-42.3534	-38.1436	-36.4334	-36.1656
		1462.6	-36.1225		1551.59	-42.2371	-45.8682	-42.3879	-38.1609	-36.4401	-36.1609
		1462.61	-36.1023		1551.6	-42.2023	-45.8561	-42.4225	-38.1782	-36.4469	-36.1563
		1462.62	-36.0923		1551.61	-42.1675	-45.8435	-42.4572	-38.1956	-36.4537	-36.1518
		1462.62	-36.0789		1551.62	-42.1328	-45.8303	-42.492	-38.2132	-36.4607	-36.1473
		1462.63	-36.0654		1551.62	-42.0981	-45.8167	-42.5269	-38.2309	-36.4677	-36.1428
		1462.64	-36.0403		1551.63	-42.0636	-45.8026	-42.5619	-38.2487	-36.4747	-36.1385
		1462.65	-36.0185		1551.64	-42.0291	-45.788	-42.5969	-38.2666	-36.4819	-36.1341
		1462.66	-36.0067		1551.65	-41.9947	-45.7728	-42.6321	-38.2847	-36.4891	-36.1299
		1462.66	-36.0017		1551.66	-41.9605	-45.7572	-42.6674	-38.3029	-36.4964	-36.1257
		1462.67	-36.005		1551.66	-41.9262	-45.7411	-42.7027	-38.3211	-36.5038	-36.1216
		1462.68	-36.0067		1551.67	-41.8921	-45.7245	-42.7382	-38.3395	-36.5113	-36.1175
		1462.69	-36.0252		1551.68	-41.8581	-45.7074	-42.7737	-38.3581	-36.5189	-36.1135
		1462.7	-36.0503		1551.69	-41.8242	-45.6898	-42.8093	-38.3767	-36.5265	-36.1096
		1462.7	-36.1007		1551.7	-41.7903	-45.6718	-42.8449	-38.3955	-36.5343	-36.1057
		1462.71	-36.1493		1551.7	-41.7566	-45.6533	-42.8807	-38.4144	-36.5421	-36.1019
		1462.72	-36.1644		1551.71	-41.7229	-45.6343	-42.9165	-38.4334	-36.55	-36.0982
		1462.73	-36.1678		1551.72	-41.6893	-45.6148	-42.9524	-38.4526	-36.558	-36.0945
		1462.74	-36.1779		1551.73	-41.6559	-45.595	-42.9883	-38.4718	-36.5661	-36.0909
		1462.74	-36.1762		1551.74	-41.6225	-45.5746	-43.0243	-38.4912	-36.5742	-36.0873
		1462.75	-36.1527		1551.74	-41.5892	-45.5538	-43.0604	-38.5107	-36.5825	-36.0839
		1462.76	-36.1342		1551.75	-41.5561	-45.5326	-43.0965	-38.5304	-36.5908	-36.0805
		1462.77	-36.1124		1551.76	-41.523	-45.511	-43.1326	-38.5502	-36.5992	-36.0771
		1462.78	-36.0738		1551.77	-41.4901	-45.4889	-43.1688	-38.5701	-36.6077	-36.0738
		1462.78	-36.0403		1551.78	-41.4572	-45.4664	-43.2051	-38.5901	-36.6163	-36.0706
		1462.79	-36.0151		1551.78	-41.4245	-45.4435	-43.2414	-38.6102	-36.625	-36.0675
		1462.8	-36.0017		1551.79	-41.3918	-45.4202	-43.2777	-38.6305	-36.6338	-36.0644
		1462.81	-36.0017		1551.8	-41.3593	-45.3964	-43.314	-38.6509	-36.6427	-36.0614
		1462.82	-36.0034		1551.81	-41.3268	-45.3723	-43.3504	-38.6714	-36.6516	-36.0585
		1462.82	-36.0084		1551.82	-41.2945	-45.3478	-43.3868	-38.6921	-36.6606	-36.0557
		1462.83	-36.0302		1551.82	-41.2623	-45.3229	-43.4232	-38.7129	-36.6698	-36.0529
		1462.84	-36.0705		1551.83	-41.2302	-45.2977	-43.4596	-38.7338	-36.679	-36.0502
		1462.85	-36.0973		1551.84	-41.1982	-45.272	-43.496	-38.7548	-36.6883	-36.0475
		1462.86	-36.1158		1551.85	-41.1664	-45.2461	-43.5324	-38.776	-36.6977	-36.045
		1462.86	-36.1275		1551.86	-41.1346	-45.2197	-43.5688	-38.7973	-36.7072	-36.0425
		1462.87	-36.1342		1551.86	-41.103	-45.193	-43.6052	-38.8187	-36.7168	-36.04
		1462.88	-36.1225		1551.87	-41.0714	-45.166	-43.6416	-38.8402	-36.7264	-36.0377
		1462.89	-36.094		1551.88	-41.04	-45.1386	-43.6779	-38.8619	-36.7362	-36.0354
		1462.9	-36.0436		1551.89	-41.0087	-45.1109	-43.7143	-38.8837	-36.746	-36.0332
		1462.9	-35.9899		1551.9	-40.9776	-45.0829	-43.7505	-38.9056	-36.7559	-36.031
		1462.91	-35.9396		1551.9	-40.9465	-45.0546	-43.7868	-38.9276	-36.766	-36.029
		1462.92	-35.9027		1551.91	-40.9156	-45.026	-43.823	-38.9498	-36.7761	-36.027
		1462.93	-35.8842		1551.92	-40.8848	-44.997	-43.8591	-38.9721	-36.7863	-36.025
		1462.94	-35.8826		1551.93	-40.8541	-44.9678	-43.8952	-38.9945	-36.7965	-36.0232
		1462.94	-35.8809		1551.94	-40.8236	-44.9383	-43.9312	-39.017	-36.8069	-36.0214
		1462.95	-35.8742		1551.94	-40.7932	-44.9085	-43.9671	-39.0397	-36.8174	-36.0197
		1462.96	-35.8809		1551.95	-40.7629	-44.8785	-44.003	-39.0624	-36.8279	-36.018
		1462.97	-35.8859		1551.96	-40.7327	-44.8482	-44.0387	-39.0853	-36.8386	-36.0165
		1462.98	-35.8893		1551.97	-40.7026	-44.8177	-44.0744	-39.1083	-36.8493	-36.015
		1462.98	-35.901		1551.98	-40.6727	-44.7869	-44.11	-39.1315	-36.8601	-36.0136
		1462.99	-35.9245		1551.98	-40.6429	-44.7558	-44.1454	-39.1547	-36.871	-36.0122
		1463	-35.9346		1551.99	-40.6133	-44.7246	-44.1808	-39.1781	-36.882	-36.0109
		1463.01	-35.9279		1552	-40.5838	-44.6931	-44.216	-39.2016	-36.893	-36.0097
		1463.02	-35.906		1552.01	-40.5544	-44.6614	-44.2511	-39.2251	-36.9042	-36.0086
		1463.02	-35.8792		1552.02	-40.5251	-44.6295	-44.286	-39.2489	-36.9154	-36.0075
		1463.03	-35.8523		1552.02	-40.496	-44.5974	-44.3208	-39.2727	-36.9268	-36.0066
		1463.04	-35.8289		1552.03	-40.467	-44.5651	-44.3555	-39.2966	-36.9382	-36.0056
		1463.05	-35.8037		1552.04	-40.4381	-44.5326	-44.3899	-39.3207	-36.9497	-36.0048
		1463.06	-35.7701		1552.05	-40.4094	-44.4999	-44.4242	-39.3448	-36.9612	-36.004
		1463.06	-35.7399		1552.06	-40.3808	-44.4671	-44.4584	-39.3691	-36.9729	-36.0033
		1463.07	-35.7366		1552.06	-40.3524	-44.4341	-44.4923	-39.3935	-36.9846	-36.0027
		1463.08	-35.7466		1552.07	-40.3241	-44.4009	-44.5261	-39.418	-36.9965	-36.0021
		1463.09	-35.7768		1552.08	-40.2959	-44.3676	-44.5596	-39.4426	-37.0084	-36.0016
		1463.1	-35.8205		1552.09	-40.2679	-44.3342	-44.593	-39.4673	-37.0203	-36.0012
		1463.1	-35.8658		1552.1	-40.24	-44.3006	-44.6261	-39.4921	-37.0324	-36.0008
		1463.11	-35.8977		1552.1	-40.2122	-44.2668	-44.659	-39.517	-37.0446	-36.0005
		1463.12	-35.9178		1552.11	-40.1846	-44.233	-44.6917	-39.5421	-37.0568	-36.0003
		1463.13	-35.9228		1552.12	-40.1571	-44.199	-44.7242	-39.5672	-37.0691	-36.0001
		1463.14	-35.9077		1552.13	-40.1298	-44.1649	-44.7563	-39.5924	-37.0815	-36
		1463.14	-35.8842		1552.14	-40.1026	-44.1308	-44.7883	-39.6178	-37.0939	-36
		1463.15	-35.8658		1552.14	-40.0755	-44.0965	-44.8199	-39.6432	-37.1065	-36
		1463.16	-35.8507		1552.15	-40.0486	-44.0621	-44.8513	-39.6687	-37.1191	-36.0001
		1463.17	-35.8339		1552.16	-40.0218	-44.0276	-44.8825	-39.6944	-37.1318	-36.0003
		1463.18	-35.8171		1552.17	-39.9951	-43.9931	-44.9133	-39.7201	-37.1445	-36.0005
		1463.18	-35.7987		1552.18	-39.9686	-43.9585	-44.9438	-39.746	-37.1574	-36.0008
		1463.19	-35.7953		1552.18	-39.9422	-43.9238	-44.9741	-39.7719	-37.1703	-36.0012
		1463.2	-35.8087		1552.19	-39.916	-43.889	-45.004	-39.7979	-37.1833	-36.0016
		1463.21	-35.8339		1552.2	-39.8899	-43.8542	-45.0336	-39.8241	-37.1963	-36.0021
		1463.22	-35.8523		1552.21	-39.8639	-43.8193	-45.0629	-39.8503	-37.2095	-36.0027
		1463.22	-35.8826		1552.22	-39.8381	-43.7844	-45.0919	-39.8766	-37.2227	-36.0033
		1463.23	-35.9195		1552.22	-39.8124	-43.7494	-45.1205	-39.903	-37.236	-36.0039
		1463.24	-35.943		1552.23	-39.7869	-43.7144	-45.1487	-39.9295	-37.2493	-36.0047
		1463.25	-35.9513		1552.24	-39.7615	-43.6794	-45.1766	-39.9561	-37.2627	-36.0055
		1463.26	-35.9631		1552.25	-39.7362	-43.6443	-45.2042	-39.9828	-37.2762	-36.0063
		1463.26	-35.9564		1552.26	-39.7111	-43.6092	-45.2314	-40.0096	-37.2898	-36.0072
		1463.27	-35.943		1552.26	-39.6861	-43.5741	-45.2582	-40.0365	-37.3034	-36.0082
		1463.28	-35.9245		1552.27	-39.6612	-43.5389	-45.2846	-40.0635	-37.3171	-36.0092
		1463.29	-35.906		1552.28	-39.6365	-43.5038	-45.3106	-40.0905	-37.3309	-36.0103
		1463.3	-35.8876		1552.29	-39.6118	-43.4686	-45.3362	-40.1177	-37.3448	-36.0114
		1463.3	-35.8775		1552.3	-39.5874	-43.4335	-45.3615	-40.1449	-37.3587	-36.0126
		1463.31	-35.8725		1552.3	-39.563	-43.3983	-45.3863	-40.1722	-37.3726	-36.0138
		1463.32	-35.8708		1552.31	-39.5388	-43.3631	-45.4107	-40.1996	-37.3867	-36.0151
		1463.33	-35.8742		1552.32	-39.5147	-43.328	-45.4347	-40.2271	-37.4008	-36.0165
		1463.34	-35.8842		1552.33	-39.4908	-43.2928	-45.4582	-40.2547	-37.4149	-36.0179
		1463.34	-35.901		1552.34	-39.467	-43.2577	-45.4813	-40.2824	-37.4292	-36.0193
		1463.35	-35.9295		1552.34	-39.4433	-43.2225	-45.504	-40.3102	-37.4435	-36.0208
		1463.36	-35.9564		1552.35	-39.4197	-43.1874	-45.5262	-40.338	-37.4579	-36.0224
		1463.37	-35.9849		1552.36	-39.3962	-43.1523	-45.548	-40.3659	-37.4723	-36.024
		1463.38	-35.9966		1552.37	-39.3729	-43.1173	-45.5693	-40.3939	-37.4868	-36.0257
		1463.38	-35.9966		1552.38	-39.3497	-43.0822	-45.5902	-40.4221	-37.5013	-36.0274
		1463.39	-35.9983		1552.38	-39.3266	-43.0472	-45.6105	-40.4502	-37.516	-36.0291
		1463.4	-35.9966		1552.39	-39.3036	-43.0122	-45.6304	-40.4785	-37.5307	-36.0309
		1463.41	-35.9866		1552.4	-39.2808	-42.9773	-45.6499	-40.5069	-37.5454	-36.0328
		1463.42	-35.9547		1552.41	-39.2581	-42.9423	-45.6688	-40.5353	-37.5602	-36.0346
		1463.42	-35.9279		1552.42	-39.2355	-42.9075	-45.6873	-40.5638	-37.5751	-36.0366
		1463.43	-35.9044		1552.42	-39.213	-42.8726	-45.7052	-40.5925	-37.59	-36.0386
		1463.44	-35.8725		1552.43	-39.1906	-42.8378	-45.7227	-40.6212	-37.605	-36.0406
		1463.45	-35.8389		1552.44	-39.1683	-42.8031	-45.7396	-40.6499	-37.6201	-36.0427
		1463.46	-35.8406		1552.45	-39.1461	-42.7683	-45.7561	-40.6788	-37.6352	-36.0448
		1463.46	-35.8624		1552.46	-39.1241	-42.7337	-45.772	-40.7078	-37.6504	-36.047
		1463.47	-35.8708		1552.46	-39.1021	-42.6991	-45.7875	-40.7368	-37.6657	-36.0492
		1463.48	-35.8792		1552.47	-39.0803	-42.6645	-45.8024	-40.7659	-37.681	-36.0514
		1463.49	-35.8809		1552.48	-39.0585	-42.63	-45.8168	-40.7951	-37.6963	-36.0537
		1463.5	-35.8809		1552.49	-39.0369	-42.5955	-45.8306	-40.8244	-37.7118	-36.056
		1463.5	-35.8809		1552.5	-39.0154	-42.5611	-45.844	-40.8538	-37.7273	-36.0584
		1463.51	-35.8691		1552.5	-38.994	-42.5267	-45.8568	-40.8832	-37.7428	-36.0608
		1463.52	-35.8607		1552.51	-38.9726	-42.4924	-45.869	-40.9128	-37.7584	-36.0633
		1463.53	-35.844		1552.52	-38.9514	-42.4581	-45.8808	-40.9424	-37.7741	-36.0657
		1463.54	-35.8138		1552.53	-38.9303	-42.4239	-45.892	-40.9721	-37.7899	-36.0683
		1463.54	-35.7685		1552.54	-38.9092	-42.3898	-45.9026	-41.0019	-37.8057	-36.0709
		1463.55	-35.7332		1552.54	-38.8883	-42.3557	-45.9127	-41.0318	-37.8215	-36.0735
		1463.56	-35.6997		1552.55	-38.8674	-42.3217	-45.9223	-41.0618	-37.8375	-36.0761
		1463.57	-35.6711		1552.56	-38.8467	-42.2877	-45.9313	-41.0918	-37.8535	-36.0788
		1463.58	-35.6409		1552.57	-38.826	-42.2538	-45.9398	-41.122	-37.8695	-36.0815
		1463.58	-35.6393		1552.58	-38.8054	-42.22	-45.9477	-41.1522	-37.8856	-36.0843
		1463.59	-35.6594		1552.58	-38.7849	-42.1862	-45.955	-41.1825	-37.9018	-36.0871
		1463.6	-35.6846		1552.59	-38.7645	-42.1524	-45.9618	-41.213	-37.9181	-36.09
		1463.61	-35.7198		1552.6	-38.7442	-42.1188	-45.9681	-41.2434	-37.9344	-36.0928
		1463.62	-35.7634		1552.61	-38.7239	-42.0852	-45.9738	-41.274	-37.9508	-36.0958
		1463.62	-35.8121		1552.62	-38.7038	-42.0517	-45.9789	-41.3047	-37.9672	-36.0987
		1463.63	-35.8591		1552.62	-38.6837	-42.0182	-45.9835	-41.3354	-37.9837	-36.1017
		1463.64	-35.896		1552.63	-38.6637	-41.9848	-45.9875	-41.3663	-38.0003	-36.1047
		1463.65	-35.9195		1552.64	-38.6437	-41.9514	-45.991	-41.3972	-38.017	-36.1078
		1463.66	-35.9211		1552.65	-38.6239	-41.9182	-45.9939	-41.4282	-38.0337	-36.1109
		1463.66	-35.9044		1552.66	-38.6041	-41.8849	-45.9962	-41.4594	-38.0504	-36.1141
		1463.67	-35.8977		1552.66	-38.5844	-41.8518	-45.998	-41.4906	-38.0673	-36.1173
		1463.68	-35.8742		1552.67	-38.5648	-41.8187	-45.9992	-41.5218	-38.0842	-36.1205
		1463.69	-35.8423		1552.68	-38.5452	-41.7857	-45.9999	-41.5532	-38.1012	-36.1238
		1463.7	-35.8255		1552.69	-38.5258	-41.7528	-46	-41.5847	-38.1183	-36.1271
		1463.7	-35.8188		1552.7	-38.5064	-41.7199	-45.9995	-41.6162	-38.1354	-36.1304
		1463.71	-35.8171		1552.7	-38.487	-41.6871	-45.9985	-41.6479	-38.1526	-36.1338
		1463.72	-35.8104		1552.71	-38.4677	-41.6543	-45.997	-41.6796	-38.1699	-36.1372
		1463.73	-35.8054		1552.72	-38.4485	-41.6216	-45.9948	-41.7114	-38.1872	-36.1407
		1463.74	-35.8037		1552.73	-38.4294	-41.589	-45.9922	-41.7433	-38.2046	-36.1442
		1463.74	-35.8121		1552.74	-38.4103	-41.5565	-45.9889	-41.7753	-38.2221	-36.1477
		1463.75	-35.8272		1552.74	-38.3913	-41.524	-45.9851	-41.8074	-38.2397	-36.1513
		1463.76	-35.8356		1552.75	-38.3724	-41.4916	-45.9808	-41.8396	-38.2574	-36.155
		1463.77	-35.8339		1552.76	-38.3535	-41.4592	-45.9759	-41.8719	-38.2751	-36.1586
		1463.78	-35.8322		1552.77	-38.3347	-41.427	-45.9705	-41.9042	-38.2929	-36.1623
		1463.78	-35.8272		1552.78	-38.3159	-41.3948	-45.9645	-41.9367	-38.3108	-36.1661
		1463.79	-35.8255		1552.78	-38.2972	-41.3626	-45.958	-41.9692	-38.3288	-36.1699
		1463.8	-35.8221		1552.79	-38.2786	-41.3306	-45.9509	-42.0018	-38.3469	-36.1737
		1463.81	-35.8154		1552.8	-38.26	-41.2986	-45.9433	-42.0345	-38.365	-36.1776
		1463.82	-35.7953		1552.81	-38.2415	-41.2667	-45.9352	-42.0673	-38.3832	-36.1816
		1463.82	-35.7903		1552.82	-38.2231	-41.2348	-45.9265	-42.1002	-38.4016	-36.1855
		1463.83	-35.7953		1552.82	-38.2047	-41.203	-45.9173	-42.1332	-38.42	-36.1896
		1463.84	-35.797		1552.83	-38.1864	-41.1713	-45.9075	-42.1662	-38.4384	-36.1937
		1463.85	-35.8154		1552.84	-38.1681	-41.1397	-45.8973	-42.1993	-38.457	-36.1978
		1463.86	-35.8389		1552.85	-38.1499	-41.1082	-45.8865	-42.2326	-38.4757	-36.2019
		1463.86	-35.8708		1552.86	-38.1317	-41.0767	-45.8751	-42.2659	-38.4945	-36.2062
		1463.87	-35.9044		1552.86	-38.1136	-41.0453	-45.8633	-42.2993	-38.5133	-36.2104
		1463.88	-35.9329		1552.87	-38.0956	-41.0139	-45.851	-42.3327	-38.5323	-36.2148
		1463.89	-35.953		1552.88	-38.0776	-40.9827	-45.8381	-42.3663	-38.5513	-36.2191
		1463.9	-35.9597		1552.89	-38.0597	-40.9515	-45.8247	-42.3999	-38.5705	-36.2236
		1463.9	-35.9614		1552.9	-38.0419	-40.9204	-45.8108	-42.4336	-38.5897	-36.2281
		1463.91	-35.9681		1552.9	-38.0241	-40.8893	-45.7964	-42.4674	-38.6091	-36.2326
		1463.92	-35.9597		1552.91	-38.0063	-40.8584	-45.7816	-42.5012	-38.6285	-36.2372
		1463.93	-35.9413		1552.92	-37.9886	-40.8275	-45.7662	-42.5352	-38.6481	-36.2418
		1463.94	-35.9312		1552.93	-37.971	-40.7967	-45.7503	-42.5692	-38.6678	-36.2465
		1463.94	-35.9312		1552.94	-37.9534	-40.766	-45.734	-42.6033	-38.6875	-36.2513
		1463.95	-35.9312		1552.94	-37.9359	-40.7353	-45.7171	-42.6374	-38.7074	-36.2561
		1463.96	-35.9329		1552.95	-37.9185	-40.7048	-45.6998	-42.6716	-38.7274	-36.261
		1463.97	-35.9228		1552.96	-37.9011	-40.6743	-45.682	-42.7059	-38.7475	-36.266
		1463.98	-35.9044		1552.97	-37.8837	-40.6439	-45.6637	-42.7403	-38.7677	-36.271
		1463.98	-35.8826		1552.98	-37.8665	-40.6136	-45.645	-42.7747	-38.788	-36.276
		1463.99	-35.8691		1552.98	-37.8493	-40.5834	-45.6258	-42.8092	-38.8085	-36.2812
		1464	-35.8607		1552.99	-37.8321	-40.5532	-45.6061	-42.8437	-38.829	-36.2864
		1464.01	-35.8574		1553	-37.815	-40.5232	-45.586	-42.8783	-38.8497	-36.2916
		1464.02	-35.8456		1553.01	-37.798	-40.4932	-45.5654	-42.9129	-38.8705	-36.2969
		1464.02	-35.8188		1553.02	-37.781	-40.4633	-45.5444	-42.9476	-38.8914	-36.3023
		1464.03	-35.8003		1553.02	-37.7641	-40.4335	-45.523	-42.9824	-38.9125	-36.3078
		1464.04	-35.7718		1553.03	-37.7473	-40.4038	-45.5011	-43.0172	-38.9336	-36.3133
		1464.05	-35.7315		1553.04	-37.7305	-40.3742	-45.4787	-43.0521	-38.9549	-36.3189
		1464.06	-35.6913		1553.05	-37.7138	-40.3446	-45.456	-43.087	-38.9764	-36.3246
		1464.06	-35.6695		1553.06	-37.6972	-40.3152	-45.4328	-43.1219	-38.9979	-36.3303
		1464.07	-35.6678		1553.06	-37.6806	-40.2858	-45.4092	-43.1569	-39.0196	-36.3362
		1464.08	-35.6678		1553.07	-37.6641	-40.2566	-45.3853	-43.1919	-39.0414	-36.3421
		1464.09	-35.6829		1553.08	-37.6476	-40.2274	-45.3609	-43.2269	-39.0634	-36.348
		1464.1	-35.7081		1553.09	-37.6313	-40.1984	-45.3361	-43.262	-39.0854	-36.3541
		1464.1	-35.7416		1553.1	-37.615	-40.1694	-45.3109	-43.2971	-39.1077	-36.3602
		1464.11	-35.7819		1553.1	-37.5987	-40.1405	-45.2853	-43.3322	-39.13	-36.3664
		1464.12	-35.8171		1553.11	-37.5825	-40.1117	-45.2593	-43.3673	-39.1525	-36.3727
		1464.13	-35.8406		1553.12	-37.5664	-40.083	-45.233	-43.4025	-39.1751	-36.379
		1464.14	-35.8574		1553.13	-37.5504	-40.0545	-45.2063	-43.4376	-39.1979	-36.3854
		1464.14	-35.8658		1553.14	-37.5344	-40.026	-45.1792	-43.4728	-39.2208	-36.392
		1464.15	-35.8742		1553.14	-37.5186	-39.9976	-45.1517	-43.5079	-39.2439	-36.3986
		1464.16	-35.8742		1553.15	-37.5027	-39.9693	-45.1239	-43.5431	-39.2671	-36.4052
		1464.17	-35.8708		1553.16	-37.487	-39.9411	-45.0958	-43.5783	-39.2905	-36.412
		1464.18	-35.8708		1553.17	-37.4713	-39.913	-45.0673	-43.6134	-39.314	-36.4188
		1464.18	-35.8691		1553.18	-37.4558	-39.8851	-45.0385	-43.6486	-39.3376	-36.4258
		1464.19	-35.8674		1553.18	-37.4402	-39.8572	-45.0093	-43.6837	-39.3614	-36.4328
		1464.2	-35.8725		1553.19	-37.4248	-39.8294	-44.9798	-43.7188	-39.3854	-36.4399
		1464.21	-35.8842		1553.2	-37.4094	-39.8018	-44.95	-43.7539	-39.4095	-36.4471
		1464.22	-35.9044		1553.21	-37.3942	-39.7742	-44.9199	-43.7889	-39.4337	-36.4544
		1464.22	-35.9362		1553.22	-37.379	-39.7468	-44.8895	-43.8239	-39.4581	-36.4617
		1464.23	-35.9916		1553.22	-37.3638	-39.7194	-44.8588	-43.8589	-39.4827	-36.4692
		1464.24	-36.057		1553.23	-37.3488	-39.6922	-44.8278	-43.8938	-39.5074	-36.4767
		1464.25	-36.1191		1553.24	-37.3338	-39.6651	-44.7965	-43.9287	-39.5322	-36.4844
		1464.26	-36.1594		1553.25	-37.3189	-39.6381	-44.7649	-43.9635	-39.5573	-36.4921
		1464.26	-36.1862		1553.26	-37.3041	-39.6112	-44.733	-43.9982	-39.5824	-36.4999
		1464.27	-36.2047		1553.26	-37.2894	-39.5844	-44.7009	-44.0329	-39.6078	-36.5078
		1464.28	-36.2232		1553.27	-37.2748	-39.5577	-44.6685	-44.0675	-39.6333	-36.5158
		1464.29	-36.2299		1553.28	-37.2602	-39.5311	-44.6359	-44.102	-39.6589	-36.5239
		1464.3	-36.2131		1553.29	-37.2458	-39.5047	-44.603	-44.1364	-39.6847	-36.5321
		1464.3	-36.1946		1553.3	-37.2314	-39.4783	-44.5699	-44.1708	-39.7107	-36.5404
		1464.31	-36.1711		1553.3	-37.2171	-39.4521	-44.5365	-44.205	-39.7368	-36.5487
		1464.32	-36.1443		1553.31	-37.2029	-39.426	-44.5029	-44.2392	-39.763	-36.5572
		1464.33	-36.1141		1553.32	-37.1888	-39.4	-44.4691	-44.2732	-39.7895	-36.5658
		1464.34	-36.0973		1553.33	-37.1747	-39.3742	-44.435	-44.3071	-39.816	-36.5744
		1464.34	-36.0956		1553.34	-37.1608	-39.3484	-44.4008	-44.3409	-39.8428	-36.5832
		1464.35	-36.1091		1553.34	-37.1469	-39.3228	-44.3664	-44.3746	-39.8697	-36.592
		1464.36	-36.1275		1553.35	-37.1332	-39.2973	-44.3317	-44.4081	-39.8967	-36.6009
		1464.37	-36.146		1553.36	-37.1195	-39.2719	-44.2969	-44.4415	-39.9239	-36.61
		1464.38	-36.1762		1553.37	-37.1059	-39.2466	-44.2619	-44.4747	-39.9513	-36.6191
		1464.38	-36.1997		1553.38	-37.0924	-39.2214	-44.2267	-44.5077	-39.9788	-36.6283
		1464.39	-36.2064		1553.38	-37.079	-39.1964	-44.1914	-44.5406	-40.0065	-36.6377
		1464.4	-36.2198		1553.39	-37.0657	-39.1715	-44.1559	-44.5734	-40.0343	-36.6471
		1464.41	-36.2332		1553.4	-37.0525	-39.1467	-44.1202	-44.6059	-40.0623	-36.6566
		1464.42	-36.2315		1553.41	-37.0393	-39.122	-44.0844	-44.6383	-40.0904	-36.6662
		1464.42	-36.2148		1553.42	-37.0263	-39.0974	-44.0484	-44.6705	-40.1187	-36.6759
		1464.43	-36.193		1553.42	-37.0133	-39.073	-44.0123	-44.7024	-40.1472	-36.6857
		1464.44	-36.1678		1553.43	-37.0005	-39.0487	-43.9761	-44.7342	-40.1757	-36.6956
		1464.45	-36.146		1553.44	-36.9877	-39.0245	-43.9398	-44.7658	-40.2045	-36.7056
		1464.46	-36.1225		1553.45	-36.9751	-39.0004	-43.9033	-44.7971	-40.2334	-36.7157
		1464.46	-36.1191		1553.46	-36.9625	-38.9765	-43.8668	-44.8282	-40.2624	-36.7258
		1464.47	-36.1258		1553.46	-36.95	-38.9527	-43.8301	-44.859	-40.2915	-36.7361
		1464.48	-36.1359		1553.47	-36.9376	-38.929	-43.7933	-44.8896	-40.3209	-36.7465
		1464.49	-36.1577		1553.48	-36.9253	-38.9054	-43.7565	-44.92	-40.3503	-36.7569
		1464.5	-36.1862		1553.49	-36.9131	-38.882	-43.7196	-44.9501	-40.3799	-36.7675
		1464.5	-36.2232		1553.5	-36.901	-38.8586	-43.6826	-44.9799	-40.4096	-36.7781
		1464.51	-36.2617		1553.5	-36.889	-38.8354	-43.6455	-45.0094	-40.4395	-36.7889
		1464.52	-36.302		1553.51	-36.8771	-38.8124	-43.6083	-45.0387	-40.4695	-36.7997
		1464.53	-36.3205		1553.52	-36.8652	-38.7894	-43.5711	-45.0676	-40.4996	-36.8106
		1464.54	-36.3238		1553.53	-36.8535	-38.7666	-43.5339	-45.0963	-40.5299	-36.8217
		1464.54	-36.3372		1553.54	-36.8419	-38.7439	-43.4966	-45.1246	-40.5603	-36.8328
		1464.55	-36.3473		1553.54	-36.8303	-38.7213	-43.4592	-45.1526	-40.5908	-36.844
		1464.56	-36.349		1553.55	-36.8189	-38.6988	-43.4218	-45.1804	-40.6215	-36.8553
		1464.57	-36.3339		1553.56	-36.8075	-38.6765	-43.3844	-45.2077	-40.6523	-36.8667
		1464.58	-36.2987		1553.57	-36.7962	-38.6543	-43.347	-45.2347	-40.6832	-36.8781
		1464.58	-36.2718		1553.58	-36.7851	-38.6322	-43.3095	-45.2614	-40.7142	-36.8897
		1464.59	-36.2466		1553.58	-36.774	-38.6102	-43.2721	-45.2877	-40.7453	-36.9014
		1464.6	-36.2248		1553.59	-36.763	-38.5884	-43.2346	-45.3137	-40.7766	-36.9131
		1464.61	-36.2097		1553.6	-36.7521	-38.5667	-43.1971	-45.3393	-40.808	-36.9249
		1464.62	-36.2114		1553.61	-36.7413	-38.5451	-43.1597	-45.3645	-40.8395	-36.9369
		1464.62	-36.2198		1553.62	-36.7306	-38.5236	-43.1222	-45.3893	-40.8711	-36.9489
		1464.63	-36.2282		1553.62	-36.72	-38.5023	-43.0848	-45.4137	-40.9028	-36.961
		1464.64	-36.2483		1553.63	-36.7094	-38.4811	-43.0473	-45.4377	-40.9346	-36.9732
		1464.65	-36.2668		1553.64	-36.699	-38.46	-43.0099	-45.4613	-40.9665	-36.9854
		1464.66	-36.2819		1553.65	-36.6887	-38.439	-42.9726	-45.4845	-40.9985	-36.9978
		1464.66	-36.2987		1553.66	-36.6784	-38.4182	-42.9352	-45.5072	-41.0307	-37.0102
		1464.67	-36.3037		1553.66	-36.6683	-38.3974	-42.8979	-45.5295	-41.0629	-37.0228
		1464.68	-36.302		1553.67	-36.6582	-38.3768	-42.8607	-45.5514	-41.0952	-37.0354
		1464.69	-36.2936		1553.68	-36.6482	-38.3563	-42.8234	-45.5728	-41.1276	-37.0481
		1464.7	-36.2852		1553.69	-36.6383	-38.336	-42.7863	-45.5938	-41.1601	-37.0609
		1464.7	-36.2768		1553.7	-36.6285	-38.3157	-42.7492	-45.6143	-41.1927	-37.0737
		1464.71	-36.2701		1553.7	-36.6188	-38.2956	-42.7121	-45.6343	-41.2254	-37.0867
		1464.72	-36.2752		1553.71	-36.6092	-38.2756	-42.6751	-45.6539	-41.2582	-37.0997
		1464.73	-36.2701		1553.72	-36.5996	-38.2557	-42.6382	-45.673	-41.291	-37.1128
		1464.74	-36.2701		1553.73	-36.5902	-38.236	-42.6014	-45.6916	-41.324	-37.126
		1464.74	-36.2735		1553.74	-36.5808	-38.2163	-42.5646	-45.7097	-41.357	-37.1393
		1464.75	-36.2768		1553.74	-36.5716	-38.1968	-42.5279	-45.7273	-41.3901	-37.1527
		1464.76	-36.297		1553.75	-36.5624	-38.1774	-42.4913	-45.7444	-41.4233	-37.1661
		1464.77	-36.3104		1553.76	-36.5533	-38.1581	-42.4547	-45.7609	-41.4565	-37.1796
		1464.78	-36.3221		1553.77	-36.5443	-38.1389	-42.4183	-45.777	-41.4898	-37.1932
		1464.78	-36.3389		1553.78	-36.5353	-38.1199	-42.3819	-45.7925	-41.5232	-37.2069
		1464.79	-36.3507		1553.78	-36.5265	-38.101	-42.3457	-45.8076	-41.5566	-37.2207
		1464.8	-36.3574		1553.79	-36.5177	-38.0821	-42.3095	-45.822	-41.5902	-37.2345
		1464.81	-36.3708		1553.8	-36.5091	-38.0634	-42.2735	-45.836	-41.6238	-37.2485
		1464.82	-36.3775		1553.81	-36.5005	-38.0449	-42.2375	-45.8494	-41.6574	-37.2625
		1464.82	-36.3859		1553.82	-36.492	-38.0264	-42.2016	-45.8622	-41.6911	-37.2765
		1464.83	-36.3926		1553.82	-36.4836	-38.008	-42.1659	-45.8745	-41.7249	-37.2907
		1464.84	-36.401		1553.83	-36.4752	-37.9898	-42.1303	-45.8862	-41.7587	-37.305
		1464.85	-36.4295		1553.84	-36.467	-37.9717	-42.0947	-45.8974	-41.7926	-37.3193
		1464.86	-36.4732		1553.85	-36.4588	-37.9537	-42.0593	-45.908	-41.8265	-37.3337
		1464.86	-36.5117		1553.86	-36.4507	-37.9358	-42.024	-45.9181	-41.8605	-37.3482
		1464.87	-36.557		1553.86	-36.4427	-37.918	-41.9888	-45.9276	-41.8945	-37.3627
		1464.88	-36.6107		1553.87	-36.4348	-37.9003	-41.9538	-45.9365	-41.9286	-37.3774
		1464.89	-36.6628		1553.88	-36.4269	-37.8827	-41.9189	-45.9448	-41.9628	-37.3921
		1464.9	-36.6879		1553.89	-36.4192	-37.8653	-41.884	-45.9526	-41.997	-37.4069
		1464.9	-36.693		1553.9	-36.4115	-37.8479	-41.8494	-45.9597	-42.0312	-37.4218
		1464.91	-36.6963		1553.9	-36.4039	-37.8307	-41.8148	-45.9663	-42.0655	-37.4368
		1464.92	-36.6812		1553.91	-36.3963	-37.8136	-41.7804	-45.9723	-42.0998	-37.4518
		1464.93	-36.6577		1553.92	-36.3889	-37.7966	-41.7461	-45.9777	-42.1341	-37.4669
		1464.94	-36.6309		1553.93	-36.3815	-37.7797	-41.7119	-45.9826	-42.1685	-37.4821
		1464.94	-36.5956		1553.94	-36.3742	-37.7629	-41.6778	-45.9868	-42.203	-37.4974
		1464.95	-36.5503		1553.94	-36.367	-37.7462	-41.6439	-45.9905	-42.2375	-37.5128
		1464.96	-36.5185		1553.95	-36.3599	-37.7296	-41.6102	-45.9935	-42.272	-37.5282
		1464.97	-36.4933		1553.96	-36.3528	-37.7131	-41.5765	-45.996	-42.3066	-37.5438
		1464.98	-36.4799		1553.97	-36.3458	-37.6968	-41.543	-45.9979	-42.3411	-37.5594
		1464.98	-36.4916		1553.98	-36.3389	-37.6805	-41.5097	-45.9992	-42.3758	-37.5751
		1464.99	-36.5218		1553.98	-36.3321	-37.6644	-41.4764	-45.9999	-42.4104	-37.5909
		1465	-36.5705		1553.99	-36.3253	-37.6483	-41.4433	-46	-42.4451	-37.6067
		1465.01	-36.6191		1554	-36.3187	-37.6324	-41.4104	-45.9995	-42.4799	-37.6227
		1465.02	-36.6728		1554.01	-36.3121	-37.6165	-41.3776	-45.9985	-42.5146	-37.6387
		1465.02	-36.7181		1554.02	-36.3055	-37.6008	-41.3449	-45.9968	-42.5494	-37.6548
		1465.03	-36.7768		1554.02	-36.2991	-37.5851	-41.3124	-45.9946	-42.5842	-37.671
		1465.04	-36.8272		1554.03	-36.2927	-37.5696	-41.28	-45.9918	-42.6191	-37.6873
		1465.05	-36.849		1554.04	-36.2864	-37.5542	-41.2477	-45.9884	-42.6539	-37.7037
		1465.06	-36.8473		1554.05	-36.2802	-37.5389	-41.2156	-45.9844	-42.6888	-37.7202
		1465.06	-36.8406		1554.06	-36.274	-37.5236	-41.1837	-45.9799	-42.7238	-37.7367
		1465.07	-36.8356		1554.06	-36.268	-37.5085	-41.1518	-45.9747	-42.7587	-37.7534
		1465.08	-36.8171		1554.07	-36.262	-37.4935	-41.1202	-45.9691	-42.7937	-37.7701
		1465.09	-36.7886		1554.08	-36.256	-37.4785	-41.0886	-45.9628	-42.8287	-37.7869
		1465.1	-36.7785		1554.09	-36.2502	-37.4637	-41.0572	-45.956	-42.8637	-37.8038
		1465.1	-36.7785		1554.1	-36.2444	-37.449	-41.026	-45.9486	-42.8987	-37.8208
		1465.11	-36.7752		1554.1	-36.2387	-37.4344	-40.9949	-45.9407	-42.9338	-37.8379
		1465.12	-36.7685		1554.11	-36.2331	-37.4198	-40.9639	-45.9322	-42.9688	-37.8551
		1465.13	-36.7735		1554.12	-36.2275	-37.4054	-40.9331	-45.9232	-43.0039	-37.8724
		1465.14	-36.7836		1554.13	-36.222	-37.3911	-40.9024	-45.9136	-43.039	-37.8897
		1465.14	-36.8003		1554.14	-36.2166	-37.3768	-40.8719	-45.9035	-43.0741	-37.9072
		1465.15	-36.8356		1554.14	-36.2113	-37.3627	-40.8415	-45.8929	-43.1093	-37.9248
		1465.16	-36.8742		1554.15	-36.206	-37.3486	-40.8112	-45.8817	-43.1444	-37.9424
		1465.17	-36.896		1554.16	-36.2008	-37.3347	-40.7811	-45.87	-43.1796	-37.9602
		1465.18	-36.9111		1554.17	-36.1957	-37.3208	-40.7511	-45.8578	-43.2147	-37.978
		1465.18	-36.9111		1554.18	-36.1906	-37.3071	-40.7213	-45.8451	-43.2499	-37.9959
		1465.19	-36.896		1554.18	-36.1856	-37.2934	-40.6916	-45.8319	-43.285	-38.014
		1465.2	-36.8758		1554.19	-36.1807	-37.2798	-40.6621	-45.8181	-43.3202	-38.0321
		1465.21	-36.8658		1554.2	-36.1759	-37.2663	-40.6327	-45.8039	-43.3554	-38.0503
		1465.22	-36.854		1554.21	-36.1711	-37.253	-40.6034	-45.7892	-43.3906	-38.0686
		1465.22	-36.8372		1554.22	-36.1664	-37.2397	-40.5743	-45.7741	-43.4257	-38.0871
		1465.23	-36.8339		1554.22	-36.1618	-37.2265	-40.5453	-45.7584	-43.4609	-38.1056
		1465.24	-36.849		1554.23	-36.1573	-37.2134	-40.5165	-45.7423	-43.496	-38.1242
		1465.25	-36.8708		1554.24	-36.1528	-37.2003	-40.4878	-45.7257	-43.5312	-38.1429
		1465.26	-36.8758		1554.25	-36.1484	-37.1874	-40.4593	-45.7087	-43.5663	-38.1618
		1465.26	-36.8842		1554.26	-36.1441	-37.1746	-40.4308	-45.6912	-43.6014	-38.1807
		1465.27	-36.9161		1554.26	-36.1398	-37.1618	-40.4026	-45.6733	-43.6365	-38.1997
		1465.28	-36.948		1554.27	-36.1356	-37.1492	-40.3744	-45.6549	-43.6715	-38.2188
		1465.29	-36.9732		1554.28	-36.1315	-37.1366	-40.3464	-45.6361	-43.7066	-38.2381
		1465.3	-36.9916		1554.29	-36.1275	-37.1242	-40.3186	-45.6169	-43.7416	-38.2574
		1465.3	-37.0067		1554.3	-36.1235	-37.1118	-40.2908	-45.5973	-43.7765	-38.2768
		1465.31	-37.005		1554.3	-36.1196	-37.0995	-40.2633	-45.5773	-43.8115	-38.2963
		1465.32	-37.0134		1554.31	-36.1157	-37.0873	-40.2358	-45.5569	-43.8464	-38.316
		1465.33	-37.0151		1554.32	-36.112	-37.0752	-40.2085	-45.5361	-43.8812	-38.3357
		1465.34	-37.0134		1554.33	-36.1083	-37.0631	-40.1813	-45.5149	-43.916	-38.3555
		1465.34	-37.0235		1554.34	-36.1046	-37.0512	-40.1543	-45.4933	-43.9508	-38.3755
		1465.35	-37.0319		1554.34	-36.1011	-37.0393	-40.1274	-45.4714	-43.9855	-38.3955
		1465.36	-37.0302		1554.35	-36.0976	-37.0276	-40.1006	-45.4491	-44.0201	-38.4157
		1465.37	-37.0319		1554.36	-36.0942	-37.0159	-40.074	-45.4265	-44.0547	-38.4359
		1465.38	-37.057		1554.37	-36.0908	-37.0043	-40.0475	-45.4035	-44.0891	-38.4563
		1465.38	-37.0906		1554.38	-36.0875	-36.9928	-40.0212	-45.3802	-44.1236	-38.4767
		1465.39	-37.1326		1554.38	-36.0843	-36.9813	-39.9949	-45.3565	-44.1579	-38.4973
		1465.4	-37.1913		1554.39	-36.0812	-36.97	-39.9689	-45.3325	-44.1921	-38.5179
		1465.41	-37.2534		1554.4	-36.0781	-36.9587	-39.9429	-45.3083	-44.2263	-38.5387
		1465.42	-37.3003		1554.41	-36.0751	-36.9476	-39.9171	-45.2837	-44.2603	-38.5595
		1465.42	-37.3238		1554.42	-36.0721	-36.9365	-39.8914	-45.2588	-44.2943	-38.5805
		1465.43	-37.3305		1554.42	-36.0693	-36.9255	-39.8658	-45.2336	-44.3281	-38.6016
		1465.44	-37.3289		1554.43	-36.0664	-36.9145	-39.8404	-45.2081	-44.3618	-38.6227
		1465.45	-37.3171		1554.44	-36.0637	-36.9037	-39.8151	-45.1824	-44.3954	-38.644
		1465.46	-37.297		1554.45	-36.061	-36.8929	-39.7899	-45.1563	-44.4289	-38.6653
		1465.46	-37.2701		1554.46	-36.0584	-36.8822	-39.7649	-45.1301	-44.4622	-38.6868
		1465.47	-37.2416		1554.46	-36.0559	-36.8716	-39.74	-45.1035	-44.4954	-38.7084
		1465.48	-37.2349		1554.47	-36.0534	-36.8611	-39.7152	-45.0767	-44.5284	-38.73
		1465.49	-37.2383		1554.48	-36.0509	-36.8507	-39.6906	-45.0497	-44.5613	-38.7518
		1465.5	-37.2517		1554.49	-36.0486	-36.8403	-39.666	-45.0224	-44.594	-38.7736
		1465.5	-37.2685		1554.5	-36.0463	-36.83	-39.6417	-44.9949	-44.6265	-38.7956
		1465.51	-37.2953		1554.5	-36.0441	-36.8198	-39.6174	-44.9672	-44.6589	-38.8176
		1465.52	-37.3272		1554.51	-36.0419	-36.8097	-39.5932	-44.9392	-44.6911	-38.8398
		1465.53	-37.3708		1554.52	-36.0398	-36.7996	-39.5692	-44.9111	-44.723	-38.862
		1465.54	-37.406		1554.53	-36.0377	-36.7896	-39.5453	-44.8827	-44.7548	-38.8844
		1465.54	-37.4262		1554.54	-36.0357	-36.7797	-39.5216	-44.8542	-44.7864	-38.9068
		1465.55	-37.453		1554.54	-36.0338	-36.7699	-39.4979	-44.8254	-44.8177	-38.9293
		1465.56	-37.4899		1554.55	-36.0319	-36.7602	-39.4744	-44.7965	-44.8488	-38.9519
		1465.57	-37.5185		1554.56	-36.0301	-36.7505	-39.451	-44.7673	-44.8797	-38.9747
		1465.58	-37.5302		1554.57	-36.0284	-36.7409	-39.4277	-44.738	-44.9103	-38.9975
		1465.58	-37.5252		1554.58	-36.0267	-36.7314	-39.4046	-44.7086	-44.9407	-39.0204
		1465.59	-37.5268		1554.58	-36.0251	-36.7219	-39.3815	-44.6789	-44.9708	-39.0434
		1465.6	-37.5336		1554.59	-36.0235	-36.7125	-39.3586	-44.6491	-45.0007	-39.0665
		1465.61	-37.5453		1554.6	-36.022	-36.7032	-39.3358	-44.6192	-45.0302	-39.0897
		1465.62	-37.5671		1554.61	-36.0205	-36.6939	-39.3131	-44.5891	-45.0595	-39.1129
		1465.62	-37.6057		1554.62	-36.0191	-36.6848	-39.2906	-44.5589	-45.0885	-39.1363
		1465.63	-37.6661		1554.62	-36.0177	-36.6757	-39.2681	-44.5285	-45.1172	-39.1598
		1465.64	-37.7399		1554.63	-36.0164	-36.6666	-39.2458	-44.498	-45.1456	-39.1833
		1465.65	-37.8037		1554.64	-36.0152	-36.6577	-39.2235	-44.4673	-45.1736	-39.2069
		1465.66	-37.8591		1554.65	-36.014	-36.6488	-39.2014	-44.4365	-45.2013	-39.2307
		1465.66	-37.9161		1554.66	-36.0129	-36.6399	-39.1794	-44.4056	-45.2287	-39.2545
		1465.67	-37.9614		1554.66	-36.0118	-36.6312	-39.1575	-44.3746	-45.2557	-39.2784
		1465.68	-37.9866		1554.67	-36.0107	-36.6225	-39.1358	-44.3435	-45.2824	-39.3024
		1465.69	-38		1554.68	-36.0097	-36.6138	-39.1141	-44.3123	-45.3087	-39.3265
		1465.7	-38.0017		1554.69	-36.0088	-36.6052	-39.0925	-44.2809	-45.3346	-39.3507
		1465.7	-37.9815		1554.7	-36.0079	-36.5967	-39.0711	-44.2495	-45.3602	-39.3749
		1465.71	-37.9648		1554.7	-36.0071	-36.5883	-39.0497	-44.2179	-45.3853	-39.3993
		1465.72	-37.953		1554.71	-36.0063	-36.5799	-39.0285	-44.1863	-45.4101	-39.4237
		1465.73	-37.9295		1554.72	-36.0056	-36.5716	-39.0073	-44.1545	-45.4344	-39.4483
		1465.74	-37.9027		1554.73	-36.0049	-36.5633	-38.9863	-44.1227	-45.4583	-39.4729
		1465.74	-37.8859		1554.74	-36.0042	-36.5551	-38.9653	-44.0908	-45.4818	-39.4976
		1465.75	-37.8893		1554.74	-36.0036	-36.547	-38.9445	-44.0588	-45.5049	-39.5224
		1465.76	-37.9128		1554.75	-36.0031	-36.5389	-38.9238	-44.0267	-45.5275	-39.5473
		1465.77	-37.9547		1554.76	-36.0026	-36.5309	-38.9031	-43.9946	-45.5497	-39.5723
		1465.78	-38.0101		1554.77	-36.0021	-36.5229	-38.8826	-43.9623	-45.5714	-39.5974
		1465.78	-38.0654		1554.78	-36.0017	-36.515	-38.8621	-43.93	-45.5927	-39.6226
		1465.79	-38.1158		1554.78	-36.0013	-36.5071	-38.8418	-43.8977	-45.6135	-39.6478
		1465.8	-38.1409		1554.79	-36.001	-36.4994	-38.8215	-43.8652	-45.6338	-39.6732
		1465.81	-38.156		1554.8	-36.0007	-36.4916	-38.8013	-43.8327	-45.6536	-39.6986
		1465.82	-38.1779		1554.81	-36.0005	-36.4839	-38.7812	-43.8002	-45.6729	-39.7242
		1465.82	-38.203		1554.82	-36.0003	-36.4763	-38.7612	-43.7675	-45.6917	-39.7498
		1465.83	-38.2064		1554.82	-36.0002	-36.4687	-38.7413	-43.7349	-45.7101	-39.7756
		1465.84	-38.1879		1554.83	-36.0001	-36.4612	-38.7215	-43.7021	-45.7279	-39.8014
		1465.85	-38.1728		1554.84	-36	-36.4537	-38.7018	-43.6693	-45.7451	-39.8274
		1465.86	-38.1661		1554.85	-36	-36.4463	-38.6822	-43.6365	-45.7619	-39.8534
		1465.86	-38.1661		1554.86	-36	-36.439	-38.6626	-43.6036	-45.7781	-39.8795
		1465.87	-38.1644		1554.86	-36.0001	-36.4317	-38.6431	-43.5706	-45.7938	-39.9058
		1465.88	-38.1678		1554.87	-36.0002	-36.4244	-38.6237	-43.5376	-45.8089	-39.9321
		1465.89	-38.1946		1554.88	-36.0004	-36.4172	-38.6044	-43.5046	-45.8235	-39.9586
		1465.9	-38.2232		1554.89	-36.0006	-36.41	-38.5852	-43.4715	-45.8376	-39.9851
		1465.9	-38.25		1554.9	-36.0008	-36.4029	-38.5661	-43.4384	-45.851	-40.0118
		1465.91	-38.2802		1554.9	-36.0011	-36.3959	-38.547	-43.4053	-45.864	-40.0386
		1465.92	-38.3087		1554.91	-36.0014	-36.3889	-38.528	-43.3721	-45.8763	-40.0655
		1465.93	-38.3406		1554.92	-36.0018	-36.3819	-38.5091	-43.3388	-45.8881	-40.0925
		1465.94	-38.3725		1554.93	-36.0022	-36.375	-38.4903	-43.3056	-45.8993	-40.1196
		1465.94	-38.3943		1554.94	-36.0027	-36.3682	-38.4715	-43.2723	-45.9099	-40.1468
		1465.95	-38.4044		1554.94	-36.0032	-36.3614	-38.4528	-43.239	-45.92	-40.1742
		1465.96	-38.4245		1554.95	-36.0037	-36.3546	-38.4342	-43.2056	-45.9294	-40.2016
		1465.97	-38.443		1554.96	-36.0043	-36.3479	-38.4157	-43.1722	-45.9383	-40.2292
		1465.98	-38.443		1554.97	-36.0049	-36.3412	-38.3972	-43.1388	-45.9466	-40.2569
		1465.98	-38.4262		1554.98	-36.0056	-36.3346	-38.3788	-43.1054	-45.9543	-40.2848
		1465.99	-38.4128		1554.98	-36.0063	-36.3281	-38.3605	-43.072	-45.9614	-40.3128
		1466	-38.4128		1554.99	-36.0071	-36.3216	-38.3422	-43.0385	-45.9679	-40.3409
		1466.01	-38.4362		1555	-36.0079	-36.3151	-38.3241	-43.005	-45.9738	-40.3691
		1466.02	-38.4597		1555.01	-36.0088	-36.3087	-38.3059	-42.9715	-45.9791	-40.3975
		1466.02	-38.4899		1555.02	-36.0097	-36.3023	-38.2879	-42.938	-45.9838	-40.426
		1466.03	-38.5067		1555.02	-36.0106	-36.296	-38.2699	-42.9045	-45.9879	-40.4546
		1466.04	-38.5117		1555.03	-36.0117	-36.2897	-38.252	-42.871	-45.9914	-40.4834
		1466.05	-38.5151		1555.04	-36.0127	-36.2835	-38.2342	-42.8374	-45.9943	-40.5123
		1466.06	-38.5117		1555.05	-36.0138	-36.2774	-38.2164	-42.8039	-45.9966	-40.5414
		1466.06	-38.505		1555.06	-36.015	-36.2712	-38.1987	-42.7703	-45.9984	-40.5706
		1466.07	-38.4966		1555.06	-36.0162	-36.2652	-38.1811	-42.7368	-45.9995	-40.6
		1466.08	-38.4765		1555.07	-36.0174	-36.2592	-38.1635	-42.7032	-46	-40.6295
		1466.09	-38.4648		1555.08	-36.0188	-36.2532	-38.146	-42.6697	-45.9999	-40.6592
		1466.1	-38.4597		1555.09	-36.0201	-36.2473	-38.1286	-42.6361	-45.9993	-40.6891
		1466.1	-38.4497		1555.1	-36.0215	-36.2414	-38.1112	-42.6026	-45.998	-40.7191
		1466.11	-38.443		1555.1	-36.023	-36.2356	-38.094	-42.569	-45.9962	-40.7492
		1466.12	-38.4564		1555.11	-36.0245	-36.2299	-38.0767	-42.5355	-45.9938	-40.7795
		1466.13	-38.4883		1555.12	-36.0261	-36.2242	-38.0596	-42.502	-45.9907	-40.81
		1466.14	-38.5369		1555.13	-36.0278	-36.2186	-38.0425	-42.4685	-45.9872	-40.8407
		1466.14	-38.5973		1555.14	-36.0295	-36.213	-38.0255	-42.435	-45.983	-40.8715
		1466.15	-38.6594		1555.14	-36.0313	-36.2074	-38.0085	-42.4016	-45.9782	-40.9025
		1466.16	-38.7332		1555.15	-36.0331	-36.202	-37.9916	-42.3681	-45.9729	-40.9337
		1466.17	-38.8305		1555.16	-36.035	-36.1965	-37.9748	-42.3347	-45.9671	-40.965
		1466.18	-38.9211		1555.17	-36.0369	-36.1912	-37.9581	-42.3014	-45.9606	-40.9965
		1466.18	-39		1555.18	-36.0389	-36.1859	-37.9414	-42.268	-45.9536	-41.0282
		1466.19	-39.0654		1555.18	-36.041	-36.1806	-37.9248	-42.2347	-45.9461	-41.0601
		1466.2	-39.1158		1555.19	-36.0432	-36.1754	-37.9082	-42.2014	-45.938	-41.0922
		1466.21	-39.1376		1555.2	-36.0454	-36.1703	-37.8918	-42.1682	-45.9293	-41.1244
		1466.22	-39.1326		1555.21	-36.0477	-36.1653	-37.8754	-42.135	-45.9201	-41.1569
		1466.22	-39.1191		1555.22	-36.05	-36.1603	-37.859	-42.1018	-45.9104	-41.1895
		1466.23	-39.1074		1555.22	-36.0525	-36.1553	-37.8428	-42.0687	-45.9002	-41.2223
		1466.24	-39.1007		1555.23	-36.055	-36.1504	-37.8266	-42.0356	-45.8894	-41.2553
		1466.25	-39.1225		1555.24	-36.0575	-36.1456	-37.8105	-42.0026	-45.8781	-41.2885
		1466.26	-39.1477		1555.25	-36.0602	-36.1409	-37.7945	-41.9697	-45.8663	-41.3218
		1466.26	-39.1644		1555.26	-36.0629	-36.1362	-37.7785	-41.9368	-45.854	-41.3554
		1466.27	-39.1862		1555.26	-36.0657	-36.1316	-37.7627	-41.9039	-45.8412	-41.3892
		1466.28	-39.2131		1555.27	-36.0685	-36.127	-37.7469	-41.8711	-45.8279	-41.4231
		1466.29	-39.2366		1555.28	-36.0715	-36.1226	-37.7312	-41.8384	-45.8141	-41.4572
		1466.3	-39.2617		1555.29	-36.0745	-36.1182	-37.7155	-41.8058	-45.7998	-41.4916
		1466.3	-39.2953		1555.3	-36.0776	-36.1138	-37.7	-41.7732	-45.785	-41.5261
		1466.31	-39.3255		1555.3	-36.0808	-36.1096	-37.6845	-41.7407	-45.7698	-41.5608
		1466.32	-39.3406		1555.31	-36.0841	-36.1054	-37.6691	-41.7083	-45.7541	-41.5957
		1466.33	-39.3607		1555.32	-36.0874	-36.1012	-37.6538	-41.6759	-45.738	-41.6308
		1466.34	-39.3809		1555.33	-36.0908	-36.0972	-37.6385	-41.6437	-45.7214	-41.6661
		1466.34	-39.3809		1555.34	-36.0944	-36.0932	-37.6234	-41.6115	-45.7044	-41.7016
		1466.35	-39.3758		1555.34	-36.098	-36.0893	-37.6083	-41.5794	-45.6869	-41.7372
		1466.36	-39.3792		1555.35	-36.1016	-36.0855	-37.5934	-41.5474	-45.669	-41.7731
		1466.37	-39.3977		1555.36	-36.1054	-36.0818	-37.5785	-41.5155	-45.6507	-41.8091
		1466.38	-39.4329		1555.37	-36.1093	-36.0781	-37.5637	-41.4837	-45.632	-41.8454
		1466.38	-39.4765		1555.38	-36.1132	-36.0745	-37.549	-41.4519	-45.6128	-41.8818
		1466.39	-39.5319		1555.38	-36.1173	-36.071	-37.5343	-41.4203	-45.5933	-41.9184
		1466.4	-39.6057		1555.39	-36.1214	-36.0676	-37.5198	-41.3888	-45.5734	-41.9552
		1466.41	-39.6896		1555.4	-36.1256	-36.0642	-37.5054	-41.3574	-45.5531	-41.9921
		1466.42	-39.7735		1555.41	-36.1299	-36.0609	-37.491	-41.3261	-45.5324	-42.0292
		1466.42	-39.854		1555.42	-36.1343	-36.0578	-37.4768	-41.2949	-45.5113	-42.0665
		1466.43	-39.9279		1555.42	-36.1388	-36.0547	-37.4626	-41.2638	-45.4898	-42.104
		1466.44	-39.9782		1555.43	-36.1434	-36.0516	-37.4485	-41.2329	-45.468	-42.1417
		1466.45	-40.0034		1555.44	-36.1481	-36.0487	-37.4345	-41.202	-45.4459	-42.1795
		1466.46	-40.0117		1555.45	-36.1528	-36.0458	-37.4207	-41.1713	-45.4234	-42.2174
		1466.46	-40.0168		1555.46	-36.1577	-36.0431	-37.4069	-41.1407	-45.4006	-42.2556
		1466.47	-39.9966		1555.46	-36.1626	-36.0404	-37.3932	-41.1102	-45.3774	-42.2938
		1466.48	-39.9664		1555.47	-36.1677	-36.0378	-37.3796	-41.0799	-45.3539	-42.3323
		1466.49	-39.9396		1555.48	-36.1728	-36.0353	-37.3661	-41.0496	-45.3301	-42.3708
		1466.5	-39.9279		1555.49	-36.1781	-36.0329	-37.3527	-41.0195	-45.306	-42.4095
		1466.5	-39.9279		1555.5	-36.1834	-36.0305	-37.3394	-40.9896	-45.2816	-42.4484
		1466.51	-39.9362		1555.5	-36.1888	-36.0283	-37.3262	-40.9597	-45.2568	-42.4874
		1466.52	-39.9446		1555.51	-36.1943	-36.0261	-37.3131	-40.93	-45.2318	-42.5265
		1466.53	-39.9799		1555.52	-36.2	-36.024	-37.3001	-40.9004	-45.2065	-42.5657
		1466.54	-40.0369		1555.53	-36.2057	-36.022	-37.2872	-40.871	-45.1809	-42.6051
		1466.54	-40.1107		1555.54	-36.2115	-36.0201	-37.2744	-40.8417	-45.1551	-42.6446
		1466.55	-40.1963		1555.54	-36.2174	-36.0183	-37.2617	-40.8126	-45.1289	-42.6841
		1466.56	-40.2802		1555.55	-36.2233	-36.0166	-37.2491	-40.7836	-45.1025	-42.7238
		1466.57	-40.354		1555.56	-36.2294	-36.0149	-37.2366	-40.7547	-45.0759	-42.7636
		1466.58	-40.4228		1555.57	-36.2356	-36.0134	-37.2243	-40.726	-45.049	-42.8035
		1466.58	-40.4832		1555.58	-36.2419	-36.0119	-37.212	-40.6974	-45.0218	-42.8434
		1466.59	-40.5252		1555.58	-36.2482	-36.0106	-37.1998	-40.6689	-44.9944	-42.8834
		1466.6	-40.5453		1555.59	-36.2547	-36.0093	-37.1877	-40.6406	-44.9668	-42.9235
		1466.61	-40.5453		1555.6	-36.2612	-36.0081	-37.1757	-40.6125	-44.939	-42.9637
		1466.62	-40.5537		1555.61	-36.2678	-36.0069	-37.1638	-40.5845	-44.9109	-43.0039
		1466.62	-40.5638		1555.62	-36.2745	-36.0059	-37.152	-40.5566	-44.8826	-43.0442
		1466.63	-40.5772		1555.62	-36.2813	-36.0049	-37.1404	-40.5289	-44.8541	-43.0845
		1466.64	-40.6007		1555.63	-36.2882	-36.0041	-37.1288	-40.5013	-44.8254	-43.1249
		1466.65	-40.6359		1555.64	-36.2952	-36.0033	-37.1173	-40.4739	-44.7965	-43.1653
		1466.66	-40.6896		1555.65	-36.3023	-36.0026	-37.1059	-40.4467	-44.7674	-43.2057
		1466.66	-40.7534		1555.66	-36.3094	-36.002	-37.0946	-40.4195	-44.7381	-43.2461
		1466.67	-40.8205		1555.66	-36.3167	-36.0015	-37.0834	-40.3926	-44.7086	-43.2865
		1466.68	-40.8893		1555.67	-36.324	-36.001	-37.0723	-40.3657	-44.6789	-43.3269
		1466.69	-40.948		1555.68	-36.3314	-36.0007	-37.0614	-40.3391	-44.649	-43.3674
		1466.7	-40.9866		1555.69	-36.3389	-36.0004	-37.0505	-40.3125	-44.619	-43.4078
		1466.7	-41.0134		1555.7	-36.3464	-36.0002	-37.0397	-40.2861	-44.5887	-43.4481
		1466.71	-41.0201		1555.7	-36.3541	-36	-37.029	-40.2599	-44.5584	-43.4885
		1466.72	-41.0218		1555.71	-36.3618	-36	-37.0184	-40.2338	-44.5278	-43.5288
		1466.73	-41.0151		1555.72	-36.3696	-36	-37.0079	-40.2078	-44.4971	-43.569
		1466.74	-40.9983		1555.73	-36.3775	-36.0001	-36.9974	-40.182	-44.4662	-43.6092
		1466.74	-40.9782		1555.74	-36.3854	-36.0003	-36.9871	-40.1564	-44.4352	-43.6494
		1466.75	-40.9547		1555.74	-36.3935	-36.0006	-36.9769	-40.1308	-44.404	-43.6894
		1466.76	-40.9362		1555.75	-36.4016	-36.0009	-36.9667	-40.1054	-44.3727	-43.7294
		1466.77	-40.9547		1555.76	-36.4097	-36.0013	-36.9567	-40.0802	-44.3413	-43.7693
		1466.78	-40.9849		1555.77	-36.418	-36.0018	-36.9467	-40.0551	-44.3097	-43.809
		1466.78	-41.0252		1555.78	-36.4263	-36.0023	-36.9368	-40.0301	-44.2779	-43.8487
		1466.79	-41.104		1555.78	-36.4347	-36.0029	-36.927	-40.0053	-44.2461	-43.8883
		1466.8	-41.203		1555.79	-36.4431	-36.0036	-36.9173	-39.9806	-44.2141	-43.9277
		1466.81	-41.3238		1555.8	-36.4516	-36.0044	-36.9077	-39.956	-44.182	-43.967
		1466.82	-41.4413		1555.81	-36.4602	-36.0052	-36.8982	-39.9316	-44.1497	-44.0061
		1466.82	-41.5453		1555.82	-36.4688	-36.0061	-36.8887	-39.9073	-44.1174	-44.0451
		1466.83	-41.6242		1555.82	-36.4775	-36.007	-36.8793	-39.8831	-44.0849	-44.0839
		1466.84	-41.6762		1555.83	-36.4863	-36.008	-36.87	-39.8591	-44.0523	-44.1226
		1466.85	-41.703		1555.84	-36.4951	-36.0091	-36.8608	-39.8351	-44.0196	-44.161
		1466.86	-41.7248		1555.85	-36.504	-36.0102	-36.8516	-39.8113	-43.9868	-44.1993
		1466.86	-41.7349		1555.86	-36.5129	-36.0114	-36.8426	-39.7877	-43.9539	-44.2374
		1466.87	-41.7215		1555.86	-36.5219	-36.0126	-36.8336	-39.7641	-43.9208	-44.2753
		1466.88	-41.7064		1555.87	-36.5309	-36.0139	-36.8246	-39.7407	-43.8877	-44.3129
		1466.89	-41.7064		1555.88	-36.54	-36.0153	-36.8158	-39.7173	-43.8545	-44.3504
		1466.9	-41.7097		1555.89	-36.5492	-36.0167	-36.807	-39.6941	-43.8212	-44.3876
		1466.9	-41.7265		1555.9	-36.5584	-36.0181	-36.7983	-39.6711	-43.7878	-44.4245
		1466.91	-41.7601		1555.9	-36.5676	-36.0197	-36.7896	-39.6481	-43.7543	-44.4613
		1466.92	-41.802		1555.91	-36.5769	-36.0212	-36.781	-39.6252	-43.7207	-44.4977
		1466.93	-41.8473		1555.92	-36.5863	-36.0228	-36.7725	-39.6025	-43.687	-44.5339
		1466.94	-41.9128		1555.93	-36.5957	-36.0245	-36.7641	-39.5798	-43.6533	-44.5698
		1466.94	-41.9899		1555.94	-36.6051	-36.0262	-36.7557	-39.5573	-43.6195	-44.6054
		1466.95	-42.0738		1555.94	-36.6146	-36.0279	-36.7473	-39.5348	-43.5855	-44.6408
		1466.96	-42.1678		1555.95	-36.6241	-36.0297	-36.739	-39.5125	-43.5516	-44.6758
		1466.97	-42.25		1555.96	-36.6337	-36.0316	-36.7308	-39.4902	-43.5175	-44.7105
		1466.98	-42.3104		1555.97	-36.6433	-36.0335	-36.7227	-39.4681	-43.4834	-44.7449
		1466.98	-42.3591		1555.98	-36.653	-36.0354	-36.7145	-39.446	-43.4492	-44.779
		1466.99	-42.3809		1555.98	-36.6627	-36.0373	-36.7065	-39.4241	-43.4149	-44.8127
		1467	-42.3826		1555.99	-36.6724	-36.0393	-36.6985	-39.4022	-43.3806	-44.8461
		1467.01	-42.3809		1556	-36.6822	-36.0414	-36.6905	-39.3805	-43.3463	-44.8792
		1467.02	-42.3859		1556.01	-36.692	-36.0435	-36.6826	-39.3588	-43.3118	-44.9118
		1467.02	-42.4044		1556.02	-36.7019	-36.0456	-36.6748	-39.3372	-43.2773	-44.9442
		1467.03	-42.448		1556.02	-36.7118	-36.0477	-36.667	-39.3157	-43.2428	-44.9761
		1467.04	-42.4933		1556.03	-36.7217	-36.0499	-36.6592	-39.2943	-43.2082	-45.0077
		1467.05	-42.5386		1556.04	-36.7317	-36.0521	-36.6515	-39.2729	-43.1736	-45.0389
		1467.06	-42.5654		1556.05	-36.7417	-36.0544	-36.6439	-39.2517	-43.1389	-45.0697
		1467.06	-42.5805		1556.06	-36.7517	-36.0567	-36.6362	-39.2305	-43.1042	-45.1001
		1467.07	-42.594		1556.06	-36.7618	-36.059	-36.6287	-39.2094	-43.0694	-45.13
		1467.08	-42.6074		1556.07	-36.7719	-36.0613	-36.6211	-39.1883	-43.0346	-45.1596
		1467.09	-42.6091		1556.08	-36.7821	-36.0637	-36.6137	-39.1674	-42.9998	-45.1888
		1467.1	-42.6124		1556.09	-36.7922	-36.0661	-36.6062	-39.1465	-42.9649	-45.2175
		1467.1	-42.6309		1556.1	-36.8025	-36.0686	-36.5988	-39.1257	-42.93	-45.2457
		1467.11	-42.6477		1556.1	-36.8127	-36.071	-36.5914	-39.105	-42.8951	-45.2736
		1467.12	-42.6527		1556.11	-36.823	-36.0735	-36.5841	-39.0843	-42.8601	-45.301
		1467.13	-42.6711		1556.12	-36.8334	-36.0761	-36.5768	-39.0637	-42.8252	-45.3279
		1467.14	-42.7047		1556.13	-36.8437	-36.0786	-36.5695	-39.0432	-42.7902	-45.3544
		1467.14	-42.75		1556.14	-36.8541	-36.0812	-36.5623	-39.0228	-42.7552	-45.3804
		1467.15	-42.8238		1556.14	-36.8646	-36.0838	-36.5551	-39.0024	-42.7202	-45.4059
		1467.16	-42.9295		1556.15	-36.8751	-36.0865	-36.548	-38.9821	-42.6851	-45.431
		1467.17	-43.0587		1556.16	-36.8856	-36.0891	-36.5409	-38.9618	-42.6501	-45.4556
		1467.18	-43.198		1556.17	-36.8961	-36.0918	-36.5338	-38.9416	-42.615	-45.4797
		1467.18	-43.3389		1556.18	-36.9067	-36.0946	-36.5267	-38.9215	-42.58	-45.5033
		1467.19	-43.4715		1556.18	-36.9174	-36.0973	-36.5197	-38.9014	-42.5449	-45.5264
		1467.2	-43.5923		1556.19	-36.9281	-36.1001	-36.5128	-38.8814	-42.5099	-45.549
		1467.21	-43.6846		1556.2	-36.9388	-36.1029	-36.5058	-38.8614	-42.4749	-45.5711
		1467.22	-43.7416		1556.21	-36.9496	-36.1057	-36.4989	-38.8416	-42.4398	-45.5926
		1467.22	-43.7601		1556.22	-36.9604	-36.1086	-36.492	-38.8217	-42.4048	-45.6137
		1467.23	-43.7299		1556.22	-36.9712	-36.1115	-36.4852	-38.802	-42.3698	-45.6342
		1467.24	-43.6728		1556.23	-36.9821	-36.1144	-36.4784	-38.7823	-42.3348	-45.6542
		1467.25	-43.5805		1556.24	-36.9931	-36.1174	-36.4716	-38.7626	-42.2998	-45.6737
		1467.26	-43.4732		1556.25	-37.004	-36.1204	-36.4649	-38.743	-42.2649	-45.6927
		1467.26	-43.3809		1556.26	-37.0151	-36.1234	-36.4582	-38.7235	-42.23	-45.7111
		1467.27	-43.3205		1556.26	-37.0262	-36.1265	-36.4515	-38.704	-42.1951	-45.7289
		1467.28	-43.2869		1556.27	-37.0373	-36.1296	-36.4449	-38.6846	-42.1602	-45.7463
		1467.29	-43.2819		1556.28	-37.0485	-36.1327	-36.4383	-38.6653	-42.1253	-45.763
		1467.3	-43.3138		1556.29	-37.0597	-36.1358	-36.4317	-38.646	-42.0905	-45.7792
		1467.3	-43.3674		1556.3	-37.071	-36.139	-36.4252	-38.6267	-42.0558	-45.7949
		1467.31	-43.453		1556.3	-37.0824	-36.1422	-36.4187	-38.6075	-42.0211	-45.81
		1467.32	-43.5789		1556.31	-37.0938	-36.1455	-36.4122	-38.5884	-41.9864	-45.8246
		1467.33	-43.7332		1556.32	-37.1052	-36.1488	-36.4058	-38.5693	-41.9517	-45.8385
		1467.34	-43.9144		1556.33	-37.1167	-36.1521	-36.3994	-38.5503	-41.9171	-45.852
		1467.34	-44.1007		1556.34	-37.1283	-36.1555	-36.393	-38.5314	-41.8826	-45.8648
		1467.35	-44.2701		1556.34	-37.14	-36.1589	-36.3867	-38.5125	-41.8481	-45.8771
		1467.36	-44.4178		1556.35	-37.1517	-36.1623	-36.3805	-38.4937	-41.8137	-45.8888
		1467.37	-44.5336		1556.36	-37.1634	-36.1658	-36.3742	-38.4749	-41.7793	-45.8999
		1467.38	-44.6057		1556.37	-37.1753	-36.1694	-36.368	-38.4562	-41.745	-45.9104
		1467.38	-44.6409		1556.38	-37.1872	-36.1729	-36.3619	-38.4376	-41.7108	-45.9204
		1467.39	-44.6493		1556.38	-37.1991	-36.1765	-36.3558	-38.419	-41.6766	-45.9298
		1467.4	-44.6426		1556.39	-37.2112	-36.1802	-36.3497	-38.4005	-41.6425	-45.9386
		1467.41	-44.6376		1556.4	-37.2233	-36.1839	-36.3436	-38.382	-41.6085	-45.9468
		1467.42	-44.6393		1556.41	-37.2355	-36.1877	-36.3377	-38.3636	-41.5745	-45.9544
		1467.42	-44.651		1556.42	-37.2477	-36.1915	-36.3317	-38.3453	-41.5406	-45.9615
		1467.43	-44.6728		1556.42	-37.26	-36.1953	-36.3258	-38.327	-41.5068	-45.9679
		1467.44	-44.7131		1556.43	-37.2725	-36.1993	-36.32	-38.3088	-41.4731	-45.9738
		1467.45	-44.7735		1556.44	-37.2849	-36.2032	-36.3142	-38.2907	-41.4394	-45.9791
		1467.46	-44.8557		1556.45	-37.2975	-36.2072	-36.3084	-38.2726	-41.4059	-45.9838
		1467.46	-44.9547		1556.46	-37.3102	-36.2113	-36.3027	-38.2546	-41.3724	-45.9878
		1467.47	-45.0654		1556.46	-37.3229	-36.2154	-36.297	-38.2367	-41.339	-45.9913
		1467.48	-45.1862		1556.47	-37.3357	-36.2196	-36.2914	-38.2188	-41.3057	-45.9943
		1467.49	-45.3087		1556.48	-37.3486	-36.2238	-36.2859	-38.201	-41.2725	-45.9966
		1467.5	-45.4262		1556.49	-37.3616	-36.2281	-36.2803	-38.1833	-41.2394	-45.9983
		1467.5	-45.5319		1556.5	-37.3747	-36.2325	-36.2749	-38.1656	-41.2064	-45.9995
		1467.51	-45.6326		1556.5	-37.3879	-36.2369	-36.2695	-38.148	-41.1735	-46
		1467.52	-45.7198		1556.51	-37.4011	-36.2414	-36.2641	-38.1305	-41.1407	-46
		1467.53	-45.797		1556.52	-37.4145	-36.2459	-36.2589	-38.1131	-41.108	-45.9993
		1467.54	-45.8674		1556.53	-37.4279	-36.2506	-36.2536	-38.0957	-41.0754	-45.9981
		1467.54	-45.9262		1556.54	-37.4415	-36.2552	-36.2484	-38.0784	-41.0429	-45.9963
		1467.55	-45.9883		1556.54	-37.4551	-36.26	-36.2433	-38.0612	-41.0105	-45.9939
		1467.56	-46.0503		1556.55	-37.4689	-36.2648	-36.2383	-38.0441	-40.9782	-45.9909
		1467.57	-46.1242		1556.56	-37.4827	-36.2697	-36.2333	-38.027	-40.9461	-45.9874
		1467.58	-46.1997		1556.57	-37.4967	-36.2746	-36.2283	-38.0101	-40.914	-45.9832
		1467.58	-46.2819		1556.58	-37.5107	-36.2797	-36.2234	-37.9932	-40.8821	-45.9785
		1467.59	-46.3574		1556.58	-37.5248	-36.2848	-36.2186	-37.9763	-40.8503	-45.9732
		1467.6	-46.4178		1556.59	-37.5391	-36.2899	-36.2139	-37.9596	-40.8186	-45.9673
		1467.61	-46.4614		1556.6	-37.5535	-36.2952	-36.2092	-37.9429	-40.787	-45.9608
		1467.62	-46.4933		1556.61	-37.5679	-36.3005	-36.2046	-37.9264	-40.7555	-45.9538
		1467.62	-46.5201		1556.62	-37.5825	-36.3059	-36.2	-37.9099	-40.7242	-45.9462
		1467.63	-46.5386		1556.62	-37.5972	-36.3114	-36.1955	-37.8935	-40.693	-45.938
		1467.64	-46.5537		1556.63	-37.6119	-36.317	-36.1911	-37.8772	-40.6619	-45.9293
		1467.65	-46.5789		1556.64	-37.6268	-36.3226	-36.1868	-37.8609	-40.6309	-45.92
		1467.66	-46.6158		1556.65	-37.6419	-36.3283	-36.1825	-37.8448	-40.6001	-45.9101
		1467.66	-46.6644		1556.66	-37.657	-36.3342	-36.1783	-37.8287	-40.5694	-45.8997
		1467.67	-46.7198		1556.66	-37.6722	-36.34	-36.1741	-37.8128	-40.5388	-45.8887
		1467.68	-46.7852		1556.67	-37.6875	-36.346	-36.1701	-37.7969	-40.5083	-45.8772
		1467.69	-46.8658		1556.68	-37.703	-36.3521	-36.1661	-37.7811	-40.478	-45.8651
		1467.7	-46.953		1556.69	-37.7186	-36.3582	-36.1622	-37.7654	-40.4478	-45.8525
		1467.7	-47.0503		1556.7	-37.7343	-36.3645	-36.1583	-37.7498	-40.4178	-45.8394
		1467.71	-47.1577		1556.7	-37.7501	-36.3708	-36.1545	-37.7342	-40.3879	-45.8257
		1467.72	-47.2718		1556.71	-37.766	-36.3772	-36.1509	-37.7188	-40.3581	-45.8115
		1467.73	-47.3859		1556.72	-37.782	-36.3837	-36.1472	-37.7035	-40.3284	-45.7967
		1467.74	-47.4849		1556.73	-37.7982	-36.3903	-36.1437	-37.6882	-40.2989	-45.7814
		1467.74	-47.5789		1556.74	-37.8144	-36.397	-36.1402	-37.6731	-40.2695	-45.7656
		1467.75	-47.6577		1556.74	-37.8308	-36.4037	-36.1369	-37.658	-40.2403	-45.7493
		1467.76	-47.7248		1556.75	-37.8473	-36.4106	-36.1335	-37.6431	-40.2112	-45.7325
		1467.77	-47.7852		1556.76	-37.864	-36.4175	-36.1303	-37.6282	-40.1822	-45.7152
		1467.78	-47.8356		1556.77	-37.8807	-36.4246	-36.1272	-37.6134	-40.1534	-45.6974
		1467.78	-47.8809		1556.78	-37.8976	-36.4317	-36.1241	-37.5987	-40.1247	-45.6791
		1467.79	-47.9262		1556.78	-37.9145	-36.439	-36.1211	-37.5842	-40.0962	-45.6602
		1467.8	-47.9849		1556.79	-37.9316	-36.4463	-36.1182	-37.5697	-40.0678	-45.641
		1467.81	-48.0621		1556.8	-37.9489	-36.4537	-36.1154	-37.5553	-40.0395	-45.6212
		1467.82	-48.1577		1556.81	-37.9662	-36.4612	-36.1127	-37.541	-40.0114	-45.6009
		1467.82	-48.2567		1556.82	-37.9837	-36.4688	-36.11	-37.5268	-39.9834	-45.5802
		1467.83	-48.3591		1556.82	-38.0013	-36.4765	-36.1074	-37.5127	-39.9556	-45.5591
		1467.84	-48.4614		1556.83	-38.019	-36.4843	-36.105	-37.4987	-39.9279	-45.5374
		1467.85	-48.5537		1556.84	-38.0368	-36.4922	-36.1026	-37.4848	-39.9004	-45.5153
		1467.86	-48.6174		1556.85	-38.0547	-36.5002	-36.1002	-37.471	-39.8729	-45.4928
		1467.86	-48.6695		1556.86	-38.0728	-36.5083	-36.098	-37.4574	-39.8457	-45.4699
		1467.87	-48.703		1556.86	-38.091	-36.5165	-36.0958	-37.4438	-39.8186	-45.4465
		1467.88	-48.7315		1556.87	-38.1093	-36.5248	-36.0938	-37.4303	-39.7916	-45.4227
		1467.89	-48.7534		1556.88	-38.1277	-36.5331	-36.0918	-37.4169	-39.7648	-45.3984
		1467.9	-48.7634		1556.89	-38.1462	-36.5416	-36.0899	-37.4036	-39.7381	-45.3738
		1467.9	-48.7785		1556.9	-38.1649	-36.5502	-36.0881	-37.3904	-39.7116	-45.3487
		1467.91	-48.7886		1556.9	-38.1837	-36.5589	-36.0864	-37.3773	-39.6852	-45.3233
		1467.92	-48.807		1556.91	-38.2026	-36.5676	-36.0847	-37.3643	-39.6589	-45.2975
		1467.93	-48.8339		1556.92	-38.2216	-36.5765	-36.0832	-37.3514	-39.6328	-45.2712
		1467.94	-48.8809		1556.93	-38.2407	-36.5854	-36.0817	-37.3386	-39.6069	-45.2446
		1467.94	-48.9547		1556.94	-38.26	-36.5945	-36.0803	-37.3259	-39.581	-45.2177
		1467.95	-49.0705		1556.94	-38.2794	-36.6037	-36.079	-37.3133	-39.5554	-45.1903
		1467.96	-49.2148		1556.95	-38.2989	-36.6129	-36.0778	-37.3008	-39.5299	-45.1627
		1467.97	-49.4027		1556.96	-38.3185	-36.6223	-36.0767	-37.2885	-39.5045	-45.1346
		1467.98	-49.6074		1556.97	-38.3382	-36.6317	-36.0757	-37.2762	-39.4793	-45.1063
		1467.98	-49.8221		1556.98	-38.3581	-36.6412	-36.0747	-37.264	-39.4542	-45.0776
		1467.99	-50.0268		1556.98	-38.378	-36.6509	-36.0738	-37.2519	-39.4292	-45.0486
		1468	-50.2299		1556.99	-38.3981	-36.6606	-36.0731	-37.2399	-39.4045	-45.0192
		1468.01	-50.4211		1557	-38.4183	-36.6704	-36.0724	-37.228	-39.3798	-44.9896
		1468.02	-50.604		1557.01	-38.4386	-36.6804	-36.0718	-37.2163	-39.3553	-44.9596
		1468.02	-50.7701		1557.02	-38.4591	-36.6904	-36.0712	-37.2046	-39.331	-44.9294
		1468.03	-50.9262		1557.02	-38.4796	-36.7005	-36.0708	-37.193	-39.3068	-44.8988
		1468.04	-51.0587		1557.03	-38.5003	-36.7107	-36.0705	-37.1815	-39.2827	-44.868
		1468.05	-51.1779		1557.04	-38.5211	-36.721	-36.0702	-37.1701	-39.2588	-44.837
		1468.06	-51.2836		1557.05	-38.542	-36.7314	-36.07	-37.1588	-39.235	-44.8056
		1468.06	-51.3775		1557.06	-38.563	-36.7419	-36.0699	-37.1477	-39.2114	-44.774
		1468.07	-51.4564		1557.06	-38.5841	-36.7525	-36.0699	-37.1366	-39.1879	-44.7422
		1468.08	-51.5268		1557.07	-38.6053	-36.7632	-36.07	-37.1256	-39.1646	-44.7101
		1468.09	-51.5805		1557.08	-38.6267	-36.774	-36.0701	-37.1147	-39.1414	-44.6778
		1468.1	-51.6242		1557.09	-38.6482	-36.7848	-36.0704	-37.1039	-39.1183	-44.6453
		1468.1	-51.656		1557.1	-38.6697	-36.7958	-36.0707	-37.0932	-39.0954	-44.6126
		1468.11	-51.6779		1557.1	-38.6914	-36.8069	-36.0711	-37.0826	-39.0726	-44.5796
		1468.12	-51.6862		1557.11	-38.7132	-36.818	-36.0716	-37.0722	-39.05	-44.5465
		1468.13	-51.6946		1557.12	-38.7352	-36.8293	-36.0722	-37.0618	-39.0275	-44.5131
		1468.14	-51.698		1557.13	-38.7572	-36.8406	-36.0729	-37.0515	-39.0052	-44.4796
		1468.14	-51.698		1557.14	-38.7793	-36.852	-36.0736	-37.0413	-38.983	-44.4459
		1468.15	-51.6913		1557.14	-38.8016	-36.8635	-36.0744	-37.0312	-38.961	-44.4121
		1468.16	-51.6795		1557.15	-38.824	-36.8751	-36.0753	-37.0212	-38.9391	-44.378
		1468.17	-51.6644		1557.16	-38.8464	-36.8868	-36.0763	-37.0112	-38.9173	-44.3439
		1468.18	-51.6594		1557.17	-38.869	-36.8986	-36.0774	-37.0014	-38.8957	-44.3096
		1468.18	-51.6661		1557.18	-38.8917	-36.9105	-36.0785	-36.9917	-38.8742	-44.2751
		1468.19	-51.6862		1557.18	-38.9145	-36.9224	-36.0798	-36.9821	-38.8528	-44.2405
		1468.2	-51.7299		1557.19	-38.9375	-36.9345	-36.0811	-36.9726	-38.8316	-44.2058
		1468.21	-51.7852		1557.2	-38.9605	-36.9466	-36.0824	-36.9631	-38.8106	-44.171
		1468.22	-51.8473		1557.21	-38.9836	-36.9588	-36.0839	-36.9538	-38.7896	-44.1361
		1468.22	-51.9111		1557.22	-39.0069	-36.9712	-36.0855	-36.9445	-38.7688	-44.1011
		1468.23	-51.9715		1557.22	-39.0303	-36.9835	-36.0871	-36.9354	-38.7482	-44.0659
		1468.24	-52.0268		1557.23	-39.0537	-36.996	-36.0888	-36.9263	-38.7277	-44.0307
		1468.25	-52.0705		1557.24	-39.0773	-37.0086	-36.0905	-36.9174	-38.7073	-43.9955
		1468.26	-52.104		1557.25	-39.101	-37.0213	-36.0924	-36.9085	-38.687	-43.9601
		1468.26	-52.1174		1557.26	-39.1248	-37.034	-36.0943	-36.8997	-38.6669	-43.9247
		1468.27	-52.1225		1557.26	-39.1487	-37.0468	-36.0963	-36.891	-38.647	-43.8892
		1468.28	-52.1158		1557.27	-39.1728	-37.0597	-36.0984	-36.8824	-38.6271	-43.8537
		1468.29	-52.0973		1557.28	-39.1969	-37.0727	-36.1006	-36.8739	-38.6074	-43.8181
		1468.3	-52.0671		1557.29	-39.2211	-37.0858	-36.1028	-36.8654	-38.5879	-43.7825
		1468.3	-52.0352		1557.3	-39.2455	-37.099	-36.1051	-36.8571	-38.5684	-43.7469
		1468.31	-52.0151		1557.3	-39.27	-37.1122	-36.1075	-36.8489	-38.5491	-43.7112
		1468.32	-52.0017		1557.31	-39.2945	-37.1255	-36.1099	-36.8407	-38.5299	-43.6755
		1468.33	-52.0101		1557.32	-39.3192	-37.1389	-36.1124	-36.8326	-38.5109	-43.6398
		1468.34	-52.0403		1557.33	-39.344	-37.1524	-36.115	-36.8246	-38.492	-43.6041
		1468.34	-52.0889		1557.34	-39.3689	-37.166	-36.1177	-36.8167	-38.4732	-43.5684
		1468.35	-52.1493		1557.34	-39.3939	-37.1796	-36.1204	-36.8089	-38.4545	-43.5327
		1468.36	-52.2248		1557.35	-39.419	-37.1934	-36.1232	-36.8012	-38.436	-43.497
		1468.37	-52.307		1557.36	-39.4442	-37.2072	-36.1261	-36.7935	-38.4176	-43.4613
		1468.38	-52.3859		1557.37	-39.4696	-37.2211	-36.129	-36.786	-38.3993	-43.4256
		1468.38	-52.4597		1557.38	-39.495	-37.235	-36.132	-36.7785	-38.3811	-43.3899
		1468.39	-52.5285		1557.38	-39.5205	-37.2491	-36.1351	-36.7711	-38.3631	-43.3543
		1468.4	-52.5738		1557.39	-39.5462	-37.2632	-36.1383	-36.7638	-38.3452	-43.3187
		1468.41	-52.6007		1557.4	-39.5719	-37.2774	-36.1415	-36.7565	-38.3274	-43.2831
		1468.42	-52.5956		1557.41	-39.5978	-37.2917	-36.1447	-36.7494	-38.3097	-43.2476
		1468.42	-52.5554		1557.42	-39.6238	-37.306	-36.1481	-36.7423	-38.2922	-43.2122
		1468.43	-52.4849		1557.42	-39.6499	-37.3205	-36.1515	-36.7353	-38.2748	-43.1767
		1468.44	-52.3792		1557.43	-39.6761	-37.335	-36.155	-36.7284	-38.2575	-43.1414
		1468.45	-52.2399		1557.44	-39.7023	-37.3496	-36.1585	-36.7215	-38.2403	-43.106
		1468.46	-52.0738		1557.45	-39.7287	-37.3642	-36.1621	-36.7148	-38.2232	-43.0708
		1468.46	-51.8943		1557.46	-39.7553	-37.379	-36.1658	-36.7081	-38.2062	-43.0356
		1468.47	-51.7164		1557.46	-39.7819	-37.3938	-36.1695	-36.7015	-38.1894	-43.0005
		1468.48	-51.5537		1557.47	-39.8086	-37.4087	-36.1733	-36.695	-38.1727	-42.9654
		1468.49	-51.4111		1557.48	-39.8354	-37.4237	-36.1771	-36.6885	-38.156	-42.9305
		1468.5	-51.3003		1557.49	-39.8623	-37.4387	-36.181	-36.6821	-38.1395	-42.8956
		1468.5	-51.2265		1557.5	-39.8894	-37.4538	-36.185	-36.6758	-38.1231	-42.8608
		1468.51	-51.1762		1557.5	-39.9165	-37.469	-36.1891	-36.6696	-38.1068	-42.826
		1468.52	-51.1493		1557.51	-39.9438	-37.4843	-36.1931	-36.6634	-38.0906	-42.7914
		1468.53	-51.1376		1557.52	-39.9711	-37.4996	-36.1973	-36.6573	-38.0746	-42.7568
		1468.54	-51.1275		1557.53	-39.9986	-37.515	-36.2015	-36.6513	-38.0586	-42.7224
		1468.54	-51.1091		1557.54	-40.0261	-37.5305	-36.2058	-36.6453	-38.0427	-42.688
		1468.55	-51.0856		1557.54	-40.0538	-37.5461	-36.2101	-36.6395	-38.027	-42.6537
		1468.56	-51.0403		1557.55	-40.0815	-37.5617	-36.2145	-36.6337	-38.0113	-42.6195
		1468.57	-50.9883		1557.56	-40.1094	-37.5774	-36.2189	-36.6279	-37.9958	-42.5854
		1468.58	-50.9228		1557.57	-40.1374	-37.5932	-36.2234	-36.6222	-37.9803	-42.5515
		1468.58	-50.849		1557.58	-40.1655	-37.609	-36.228	-36.6166	-37.9649	-42.5176
		1468.59	-50.7651		1557.58	-40.1936	-37.625	-36.2326	-36.6111	-37.9497	-42.4838
		1468.6	-50.6862		1557.59	-40.2219	-37.641	-36.2373	-36.6056	-37.9345	-42.4501
		1468.61	-50.6158		1557.6	-40.2503	-37.657	-36.242	-36.6002	-37.9195	-42.4165
		1468.62	-50.552		1557.61	-40.2788	-37.6732	-36.2468	-36.5949	-37.9045	-42.3831
		1468.62	-50.4966		1557.62	-40.3074	-37.6894	-36.2516	-36.5896	-37.8896	-42.3497
		1468.63	-50.4748		1557.62	-40.3361	-37.7057	-36.2565	-36.5844	-37.8748	-42.3165
		1468.64	-50.4832		1557.63	-40.3648	-37.722	-36.2614	-36.5792	-37.8601	-42.2833
		1468.65	-50.5101		1557.64	-40.3937	-37.7385	-36.2664	-36.5741	-37.8455	-42.2503
		1468.66	-50.5403		1557.65	-40.4227	-37.755	-36.2715	-36.5691	-37.831	-42.2174
		1468.66	-50.5554		1557.66	-40.4518	-37.7716	-36.2766	-36.5641	-37.8166	-42.1846
		1468.67	-50.5369		1557.66	-40.481	-37.7882	-36.2817	-36.5592	-37.8023	-42.1519
		1468.68	-50.4849		1557.67	-40.5103	-37.8049	-36.2869	-36.5543	-37.788	-42.1193
		1468.69	-50.3993		1557.68	-40.5397	-37.8217	-36.2922	-36.5495	-37.7739	-42.0869
		1468.7	-50.2802		1557.69	-40.5691	-37.8386	-36.2975	-36.5448	-37.7598	-42.0545
		1468.7	-50.1409		1557.7	-40.5987	-37.8556	-36.3029	-36.5401	-37.7458	-42.0223
		1468.71	-49.9916		1557.7	-40.6284	-37.8726	-36.3083	-36.5355	-37.7319	-41.9902
		1468.72	-49.8389		1557.71	-40.6582	-37.8897	-36.3137	-36.5309	-37.7181	-41.9582
		1468.73	-49.6779		1557.72	-40.688	-37.9068	-36.3192	-36.5264	-37.7043	-41.9263
		1468.74	-49.5336		1557.73	-40.718	-37.9241	-36.3248	-36.522	-37.6907	-41.8945
		1468.74	-49.4094		1557.74	-40.7481	-37.9414	-36.3304	-36.5176	-37.6771	-41.8628
		1468.75	-49.3104		1557.74	-40.7782	-37.9588	-36.3361	-36.5133	-37.6636	-41.8313
		1468.76	-49.2399		1557.75	-40.8085	-37.9762	-36.3418	-36.509	-37.6502	-41.7998
		1468.77	-49.2064		1557.76	-40.8389	-37.9938	-36.3476	-36.5047	-37.6368	-41.7685
		1468.78	-49.198		1557.77	-40.8693	-38.0114	-36.3534	-36.5006	-37.6236	-41.7373
		1468.78	-49.2114		1557.78	-40.8999	-38.029	-36.3593	-36.4964	-37.6104	-41.7061
		1468.79	-49.2215		1557.78	-40.9305	-38.0468	-36.3652	-36.4924	-37.5972	-41.6752
		1468.8	-49.2198		1557.79	-40.9613	-38.0646	-36.3712	-36.4884	-37.5842	-41.6443
		1468.81	-49.1879		1557.8	-40.9921	-38.0826	-36.3772	-36.4844	-37.5712	-41.6135
		1468.82	-49.1326		1557.81	-41.023	-38.1006	-36.3833	-36.4805	-37.5583	-41.5828
		1468.82	-49.0386		1557.82	-41.0541	-38.1186	-36.3894	-36.4766	-37.5455	-41.5523
		1468.83	-48.9111		1557.82	-41.0852	-38.1368	-36.3956	-36.4728	-37.5327	-41.5218
		1468.84	-48.75		1557.83	-41.1164	-38.155	-36.4018	-36.469	-37.5201	-41.4915
		1468.85	-48.5604		1557.84	-41.1477	-38.1733	-36.4081	-36.4653	-37.5074	-41.4612
		1468.86	-48.3607		1557.85	-41.1791	-38.1917	-36.4144	-36.4617	-37.4949	-41.4311
		1468.86	-48.1745		1557.86	-41.2106	-38.2102	-36.4208	-36.4581	-37.4824	-41.4011
		1468.87	-48.0168		1557.86	-41.2422	-38.2287	-36.4272	-36.4545	-37.47	-41.3712
		1468.88	-47.901		1557.87	-41.2739	-38.2473	-36.4337	-36.451	-37.4577	-41.3414
		1468.89	-47.8087		1557.88	-41.3057	-38.2661	-36.4403	-36.4475	-37.4454	-41.3117
		1468.9	-47.7466		1557.89	-41.3376	-38.2849	-36.4468	-36.4441	-37.4332	-41.2821
		1468.9	-47.703		1557.9	-41.3696	-38.3037	-36.4535	-36.4408	-37.4211	-41.2526
		1468.91	-47.6728		1557.9	-41.4017	-38.3227	-36.4602	-36.4375	-37.409	-41.2232
		1468.92	-47.6527		1557.91	-41.4338	-38.3418	-36.4669	-36.4342	-37.397	-41.1939
		1468.93	-47.6443		1557.92	-41.4661	-38.3609	-36.4737	-36.431	-37.385	-41.1647
		1468.94	-47.6409		1557.93	-41.4985	-38.3801	-36.4806	-36.4278	-37.3732	-41.1356
		1468.94	-47.6376		1557.94	-41.531	-38.3994	-36.4875	-36.4247	-37.3613	-41.1066
		1468.95	-47.6242		1557.94	-41.5635	-38.4188	-36.4945	-36.4216	-37.3496	-41.0777
		1468.96	-47.5856		1557.95	-41.5962	-38.4383	-36.5015	-36.4186	-37.3379	-41.049
		1468.97	-47.5319		1557.96	-41.629	-38.4579	-36.5086	-36.4157	-37.3263	-41.0203
		1468.98	-47.4581		1557.97	-41.6618	-38.4776	-36.5157	-36.4127	-37.3147	-40.9917
		1468.98	-47.3624		1557.98	-41.6948	-38.4973	-36.5229	-36.4099	-37.3033	-40.9632
		1468.99	-47.2601		1557.98	-41.7278	-38.5172	-36.5301	-36.4071	-37.2918	-40.9348
		1469	-47.1678		1557.99	-41.761	-38.5371	-36.5374	-36.4043	-37.2805	-40.9065
		1469.01	-47.1007		1558	-41.7943	-38.5572	-36.5448	-36.4016	-37.2692	-40.8783
		1469.02	-47.0688
		1469.02	-47.052
		1469.03	-47.047
		1469.04	-47.0503
		1469.05	-47.0537
		1469.06	-47.0487
		1469.06	-47.0319
		1469.07	-46.9899
		1469.08	-46.9228
		1469.09	-46.8423
		1469.1	-46.7534
		1469.1	-46.651
		1469.11	-46.5386
		1469.12	-46.4295
		1469.13	-46.3205
		1469.14	-46.2081
		1469.14	-46.0956
		1469.15	-45.995
		1469.16	-45.8993
		1469.17	-45.8138
		1469.18	-45.7466
		1469.18	-45.6879
		1469.19	-45.6359
		1469.2	-45.5755
		1469.21	-45.5134
		1469.22	-45.4497
		1469.22	-45.3758
		1469.23	-45.3054
		1469.24	-45.25
		1469.25	-45.2181
		1469.26	-45.1997
		1469.26	-45.193
		1469.27	-45.1812
		1469.28	-45.1493
		1469.29	-45.0956
		1469.3	-45.0235
		1469.3	-44.9295
		1469.31	-44.8205
		1469.32	-44.6879
		1469.33	-44.5503
		1469.34	-44.4077
		1469.34	-44.2701
		1469.35	-44.1477
		1469.36	-44.0352
		1469.37	-43.9379
		1469.38	-43.8641
		1469.38	-43.8238
		1469.39	-43.7936
		1469.4	-43.7785
		1469.41	-43.7802
		1469.42	-43.7869
		1469.42	-43.7903
		1469.43	-43.7768
		1469.44	-43.7332
		1469.45	-43.6577
		1469.46	-43.5453
		1469.46	-43.401
		1469.47	-43.2299
		1469.48	-43.0688
		1469.49	-42.9446
		1469.5	-42.8389
		1469.5	-42.7466
		1469.51	-42.6544
		1469.52	-42.5721
		1469.53	-42.5084
		1469.54	-42.4782
		1469.54	-42.4732
		1469.55	-42.4732
		1469.56	-42.4933
		1469.57	-42.5268
		1469.58	-42.5554
		1469.58	-42.5822
		1469.59	-42.6007
		1469.6	-42.5973
		1469.61	-42.5755
		1469.62	-42.5487
		1469.62	-42.5185
		1469.63	-42.4832
		1469.64	-42.4513
		1469.65	-42.4279
		1469.66	-42.4094
		1469.66	-42.3977
		1469.67	-42.3859
		1469.68	-42.3591
		1469.69	-42.3154
		1469.7	-42.2584
		1469.7	-42.1812
		1469.71	-42.0923
		1469.72	-42.0017
		1469.73	-41.9111
		1469.74	-41.8339
		1469.74	-41.7651
		1469.75	-41.6846
		1469.76	-41.599
		1469.77	-41.5302
		1469.78	-41.4698
		1469.78	-41.4211
		1469.79	-41.3842
		1469.8	-41.3691
		1469.81	-41.3591
		1469.82	-41.3423
		1469.82	-41.3104
		1469.83	-41.2483
		1469.84	-41.1661
		1469.85	-41.0755
		1469.86	-40.9715
		1469.86	-40.8742
		1469.87	-40.7903
		1469.88	-40.7164
		1469.89	-40.6544
		1469.9	-40.6158
		1469.9	-40.5956
		1469.91	-40.5889
		1469.92	-40.6091
		1469.93	-40.6477
		1469.94	-40.698
		1469.94	-40.7517
		1469.95	-40.8138
		1469.96	-40.8641
		1469.97	-40.901
		1469.98	-40.9161
		1469.98	-40.9077
		1469.99	-40.8826
		1470	-40.8305
		1470.01	-40.7601
		1470.02	-40.6846
		1470.02	-40.6141
		1470.03	-40.5604
		1470.04	-40.5134
		1470.05	-40.4748
		1470.06	-40.4362
		1470.06	-40.3993
		1470.07	-40.3591
		1470.08	-40.302
		1470.09	-40.25
		1470.1	-40.2064
		1470.1	-40.1544
		1470.11	-40.0906
		1470.12	-40.0352
		1470.13	-39.9832
		1470.14	-39.9362
		1470.14	-39.8926
		1470.15	-39.8557
		1470.16	-39.8322
		1470.17	-39.8238
		1470.18	-39.8188
		1470.18	-39.8238
		1470.19	-39.8406
		1470.2	-39.8607
		1470.21	-39.8691
		1470.22	-39.8826
		1470.22	-39.8859
		1470.23	-39.8674
		1470.24	-39.8356
		1470.25	-39.807
		1470.26	-39.7668
		1470.26	-39.7282
		1470.27	-39.6896
		1470.28	-39.656
		1470.29	-39.6326
		1470.3	-39.6174
		1470.3	-39.6057
		1470.31	-39.5923
		1470.32	-39.5755
		1470.33	-39.5554
		1470.34	-39.5403
		1470.34	-39.5101
		1470.35	-39.4732
		1470.36	-39.4312
		1470.37	-39.3926
		1470.38	-39.3507
		1470.38	-39.297
		1470.39	-39.2332
		1470.4	-39.1812
		1470.41	-39.1477
		1470.42	-39.1258
		1470.42	-39.094
		1470.43	-39.0671
		1470.44	-39.0537
		1470.45	-39.0352
		1470.46	-39.0084
		1470.46	-38.9681
		1470.47	-38.9144
		1470.48	-38.8591
		1470.49	-38.8104
		1470.5	-38.7668
		1470.5	-38.7265
		1470.51	-38.6963
		1470.52	-38.6779
		1470.53	-38.6678
		1470.54	-38.6644
		1470.54	-38.6678
		1470.55	-38.6829
		1470.56	-38.7081
		1470.57	-38.7483
		1470.58	-38.7869
		1470.58	-38.8087
		1470.59	-38.8121
		1470.6	-38.7886
		1470.61	-38.7466
		1470.62	-38.703
		1470.62	-38.6393
		1470.63	-38.5688
		1470.64	-38.5134
		1470.65	-38.4765
		1470.66	-38.443
		1470.66	-38.4144
		1470.67	-38.3977
		1470.68	-38.3742
		1470.69	-38.349
		1470.7	-38.3339
		1470.7	-38.3188
		1470.71	-38.2987
		1470.72	-38.2634
		1470.73	-38.2114
		1470.74	-38.1426
		1470.74	-38.0789
		1470.75	-38.0201
		1470.76	-37.9564
		1470.77	-37.8809
		1470.78	-37.8154
		1470.78	-37.7735
		1470.79	-37.7466
		1470.8	-37.7433
		1470.81	-37.7534
		1470.82	-37.7601
		1470.82	-37.7785
		1470.83	-37.8054
		1470.84	-37.8188
		1470.85	-37.8272
		1470.86	-37.8188
		1470.86	-37.7987
		1470.87	-37.7651
		1470.88	-37.7131
		1470.89	-37.6611
		1470.9	-37.6191
		1470.9	-37.5805
		1470.91	-37.5352
		1470.92	-37.5084
		1470.93	-37.4883
		1470.94	-37.4715
		1470.94	-37.4698
		1470.95	-37.4664
		1470.96	-37.453
		1470.97	-37.4497
		1470.98	-37.4446
		1470.98	-37.4211
		1470.99	-37.3842
		1471	-37.3339
		1471.01	-37.2819
		1471.02	-37.2265
		1471.02	-37.1728
		1471.03	-37.1342
		1471.04	-37.1023
		1471.05	-37.0805
		1471.06	-37.0755
		1471.06	-37.0889
		1471.07	-37.104
		1471.08	-37.1191
		1471.09	-37.1191
		1471.1	-37.1158
		1471.1	-37.1074
		1471.11	-37.0772
		1471.12	-37.0352
		1471.13	-36.9899
		1471.14	-36.9379
		1471.14	-36.8893
		1471.15	-36.8372
		1471.16	-36.7987
		1471.17	-36.7701
		1471.18	-36.7617
		1471.18	-36.7752
		1471.19	-36.8221
		1471.2	-36.8792
		1471.21	-36.9379
		1471.22	-36.9966
		1471.22	-37.047
		1471.23	-37.0738
		1471.24	-37.0872
		1471.25	-37.0789
		1471.26	-37.0503
		1471.26	-37.0067
		1471.27	-36.9547
		1471.28	-36.8876
		1471.29	-36.8205
		1471.3	-36.7601
		1471.3	-36.703
		1471.31	-36.651
		1471.32	-36.6208
		1471.33	-36.6074
		1471.34	-36.6023
		1471.34	-36.604
		1471.35	-36.604
		1471.36	-36.6057
		1471.37	-36.6023
		1471.38	-36.5738
		1471.38	-36.5369
		1471.39	-36.4933
		1471.4	-36.4463
		1471.41	-36.3909
		1471.42	-36.3339
		1471.42	-36.2852
		1471.43	-36.2534
		1471.44	-36.2584
		1471.45	-36.2869
		1471.46	-36.3221
		1471.46	-36.354
		1471.47	-36.3876
		1471.48	-36.4279
		1471.49	-36.4664
		1471.5	-36.4815
		1471.5	-36.4664
		1471.51	-36.4245
		1471.52	-36.3708
		1471.53	-36.3054
		1471.54	-36.2349
		1471.54	-36.1611
		1471.55	-36.0772
		1471.56	-36.0017
		1471.57	-35.943
		1471.58	-35.9195
		1471.58	-35.9195
		1471.59	-35.9329
		1471.6	-35.953
		1471.61	-35.9849
		1471.62	-36.0185
		1471.62	-36.0604
		1471.63	-36.0906
		1471.64	-36.0839
		1471.65	-36.0755
		1471.66	-36.0537
		1471.66	-36.0168
		1471.67	-35.9815
		1471.68	-35.9446
		1471.69	-35.9111
		1471.7	-35.8809
		1471.7	-35.8742
		1471.71	-35.8725
		1471.72	-35.8809
		1471.73	-35.896
		1471.74	-35.9279
		1471.74	-35.9664
		1471.75	-35.9933
		1471.76	-36.0185
		1471.77	-36.0252
		1471.78	-36.0034
		1471.78	-35.9664
		1471.79	-35.9077
		1471.8	-35.8305
		1471.81	-35.7651
		1471.82	-35.7215
		1471.82	-35.693
		1471.83	-35.6812
		1471.84	-35.6812
		1471.85	-35.7013
		1471.86	-35.7383
		1471.86	-35.7802
		1471.87	-35.8171
		1471.88	-35.854
		1471.89	-35.8775
		1471.9	-35.8842
		1471.9	-35.8792
		1471.91	-35.8624
		1471.92	-35.8305
		1471.93	-35.7953
		1471.94	-35.7617
		1471.94	-35.7181
		1471.95	-35.6762
		1471.96	-35.6393
		1471.97	-35.6107
		1471.98	-35.5923
		1471.98	-35.5956
		1471.99	-35.6191
		1472	-35.6359
		1472.01	-35.6393
		1472.02	-35.6393
		1472.02	-35.6191
		1472.03	-35.5738
		1472.04	-35.5117
		1472.05	-35.4564
		1472.06	-35.3977
		1472.06	-35.3305
		1472.07	-35.2685
		1472.08	-35.2248
		1472.09	-35.2013
		1472.1	-35.1795
		1472.1	-35.1879
		1472.11	-35.2215
		1472.12	-35.2617
		1472.13	-35.302
		1472.14	-35.3372
		1472.14	-35.3708
		1472.15	-35.3993
		1472.16	-35.4211
		1472.17	-35.4178
		1472.18	-35.3926
		1472.18	-35.349
		1472.19	-35.302
		1472.2	-35.2534
		1472.21	-35.2181
		1472.22	-35.203
		1472.22	-35.203
		1472.23	-35.2198
		1472.24	-35.25
		1472.25	-35.2752
		1472.26	-35.3054
		1472.26	-35.3423
		1472.27	-35.3658
		1472.28	-35.3725
		1472.29	-35.3691
		1472.3	-35.3523
		1472.3	-35.3238
		1472.31	-35.2852
		1472.32	-35.2349
		1472.33	-35.1862
		1472.34	-35.1426
		1472.34	-35.104
		1472.35	-35.0755
		1472.36	-35.0604
		1472.37	-35.0621
		1472.38	-35.0822
		1472.38	-35.1158
		1472.39	-35.1527
		1472.4	-35.1896
		1472.41	-35.2064
		1472.42	-35.2097
		1472.42	-35.2064
		1472.43	-35.193
		1472.44	-35.1678
		1472.45	-35.1426
		1472.46	-35.1107
		1472.46	-35.0721
		1472.47	-35.0419
		1472.48	-35.0252
		1472.49	-35.0201
		1472.5	-35.0201
		1472.5	-35.0285
		1472.51	-35.0487
		1472.52	-35.0738
		1472.53	-35.1091
		1472.54	-35.1376
		1472.54	-35.1443
		1472.55	-35.1309
		1472.56	-35.0973
		1472.57	-35.0671
		1472.58	-35.0185
		1472.58	-34.9664
		1472.59	-34.9128
		1472.6	-34.8674
		1472.61	-34.8456
		1472.62	-34.8473
		1472.62	-34.8507
		1472.63	-34.8607
		1472.64	-34.8809
		1472.65	-34.9128
		1472.66	-34.9413
		1472.66	-34.9631
		1472.67	-34.9832
		1472.68	-34.9849
		1472.69	-34.9799
		1472.7	-34.9664
		1472.7	-34.9463
		1472.71	-34.9161
		1472.72	-34.8876
		1472.73	-34.8658
		1472.74	-34.8473
		1472.74	-34.8372
		1472.75	-34.8473
		1472.76	-34.8641
		1472.77	-34.8859
		1472.78	-34.9128
		1472.78	-34.9346
		1472.79	-34.943
		1472.8	-34.9413
		1472.81	-34.9312
		1472.82	-34.8977
		1472.82	-34.8406
		1472.83	-34.7919
		1472.84	-34.7517
		1472.85	-34.7081
		1472.86	-34.6745
		1472.86	-34.6577
		1472.87	-34.6477
		1472.88	-34.6443
		1472.89	-34.6493
		1472.9	-34.6711
		1472.9	-34.6879
		1472.91	-34.7081
		1472.92	-34.7349
		1472.93	-34.7567
		1472.94	-34.7718
		1472.94	-34.7768
		1472.95	-34.7735
		1472.96	-34.7534
		1472.97	-34.7198
		1472.98	-34.6896
		1472.98	-34.6628
		1472.99	-34.6544
		1473	-34.6544
		1473.01	-34.6628
		1473.02	-34.6879
		1473.02	-34.7349
		1473.03	-34.7701
		1473.04	-34.7936
		1473.05	-34.8171
		1473.06	-34.8221
		1473.06	-34.8087
		1473.07	-34.7802
		1473.08	-34.7433
		1473.09	-34.6997
		1473.1	-34.6544
		1473.1	-34.599
		1473.11	-34.5369
		1473.12	-34.4883
		1473.13	-34.4597
		1473.14	-34.4346
		1473.14	-34.4211
		1473.15	-34.4295
		1473.16	-34.4413
		1473.17	-34.4631
		1473.18	-34.4899
		1473.18	-34.5185
		1473.19	-34.5419
		1473.2	-34.5436
		1473.21	-34.5235
		1473.22	-34.4916
		1473.22	-34.4547
		1473.23	-34.4262
		1473.24	-34.3909
		1473.25	-34.3641
		1473.26	-34.3507
		1473.26	-34.3456
		1473.27	-34.3591
		1473.28	-34.3826
		1473.29	-34.4128
		1473.3	-34.4346
		1473.3	-34.4581
		1473.31	-34.4866
		1473.32	-34.5101
		1473.33	-34.5285
		1473.34	-34.5386
		1473.34	-34.5453
		1473.35	-34.5453
		1473.36	-34.5319
		1473.37	-34.5101
		1473.38	-34.4782
		1473.38	-34.453
		1473.39	-34.443
		1473.4	-34.448
		1473.41	-34.4513
		1473.42	-34.4614
		1473.42	-34.4748
		1473.43	-34.4799
		1473.44	-34.4614
		1473.45	-34.453
		1473.46	-34.4446
		1473.46	-34.4346
		1473.47	-34.4228
		1473.48	-34.4128
		1473.49	-34.3876
		1473.5	-34.3624
		1473.5	-34.354
		1473.51	-34.3557
		1473.52	-34.3658
		1473.53	-34.3876
		1473.54	-34.4077
		1473.54	-34.4211
		1473.55	-34.4396
		1473.56	-34.4631
		1473.57	-34.4916
		1473.58	-34.5034
		1473.58	-34.5101
		1473.59	-34.5101
		1473.6	-34.4883
		1473.61	-34.4396
		1473.62	-34.396
		1473.62	-34.3691
		1473.63	-34.3523
		1473.64	-34.3473
		1473.65	-34.3523
		1473.66	-34.354
		1473.66	-34.3557
		1473.67	-34.3591
		1473.68	-34.3691
		1473.69	-34.3859
		1473.7	-34.4144
		1473.7	-34.4329
		1473.71	-34.4379
		1473.72	-34.4329
		1473.73	-34.4211
		1473.74	-34.4044
		1473.74	-34.3842
		1473.75	-34.3574
		1473.76	-34.3406
		1473.77	-34.3289
		1473.78	-34.3255
		1473.78	-34.3389
		1473.79	-34.3574
		1473.8	-34.3792
		1473.81	-34.4094
		1473.82	-34.4413
		1473.82	-34.4597
		1473.83	-34.4681
		1473.84	-34.4782
		1473.85	-34.4698
		1473.86	-34.4497
		1473.86	-34.4195
		1473.87	-34.396
		1473.88	-34.3742
		1473.89	-34.3507
		1473.9	-34.3238
		1473.9	-34.3087
		1473.91	-34.3138
		1473.92	-34.3171
		1473.93	-34.3305
		1473.94	-34.3523
		1473.94	-34.3842
		1473.95	-34.4279
		1473.96	-34.4681
		1473.97	-34.4983
		1473.98	-34.5151
		1473.98	-34.5252
		1473.99	-34.5252
		1474	-34.505
		1474.01	-34.4883
		1474.02	-34.4648
		1474.02	-34.4396
		1474.03	-34.4111
		1474.04	-34.3792
		1474.05	-34.3591
		1474.06	-34.3423
		1474.06	-34.3289
		1474.07	-34.3121
		1474.08	-34.2936
		1474.09	-34.2752
		1474.1	-34.2534
		1474.1	-34.2299
		1474.11	-34.198
		1474.12	-34.1695
		1474.13	-34.146
		1474.14	-34.1292
		1474.14	-34.1225
		1474.15	-34.1326
		1474.16	-34.1477
		1474.17	-34.1644
		1474.18	-34.1896
		1474.18	-34.2299
		1474.19	-34.2701
		1474.2	-34.3121
		1474.21	-34.349
		1474.22	-34.3775
		1474.22	-34.3993
		1474.23	-34.401
		1474.24	-34.3859
		1474.25	-34.3658
		1474.26	-34.3473
		1474.26	-34.3205
		1474.27	-34.2802
		1474.28	-34.245
		1474.29	-34.2232
		1474.3	-34.2097
		1474.3	-34.2131
		1474.31	-34.2148
		1474.32	-34.2215
		1474.33	-34.2383
		1474.34	-34.2567
		1474.34	-34.2802
		1474.35	-34.302
		1474.36	-34.3188
		1474.37	-34.3356
		1474.38	-34.344
		1474.38	-34.3372
		1474.39	-34.3272
		1474.4	-34.3121
		1474.41	-34.297
		1474.42	-34.2802
		1474.42	-34.2601
		1474.43	-34.2584
		1474.44	-34.2701
		1474.45	-34.2936
		1474.46	-34.3138
		1474.46	-34.3389
		1474.47	-34.3624
		1474.48	-34.3826
		1474.49	-34.401
		1474.5	-34.4161
		1474.5	-34.4279
		1474.51	-34.4262
		1474.52	-34.4295
		1474.53	-34.4329
		1474.54	-34.4312
		1474.54	-34.4178
		1474.55	-34.3993
		1474.56	-34.3859
		1474.57	-34.3775
		1474.58	-34.3725
		1474.58	-34.3775
		1474.59	-34.3792
		1474.6	-34.3876
		1474.61	-34.3926
		1474.62	-34.3943
		1474.62	-34.3977
		1474.63	-34.4077
		1474.64	-34.4211
		1474.65	-34.4379
		1474.66	-34.4648
		1474.66	-34.495
		1474.67	-34.5218
		1474.68	-34.5403
		1474.69	-34.547
		1474.7	-34.557
		1474.7	-34.5671
		1474.71	-34.5705
		1474.72	-34.5654
		1474.73	-34.5587
		1474.74	-34.552
		1474.74	-34.5419
		1474.75	-34.5268
		1474.76	-34.5101
		1474.77	-34.4933
		1474.78	-34.4765
		1474.78	-34.4664
		1474.79	-34.4715
		1474.8	-34.4916
		1474.81	-34.5185
		1474.82	-34.5554
		1474.82	-34.594
		1474.83	-34.6242
		1474.84	-34.6493
		1474.85	-34.6644
		1474.86	-34.6678
		1474.86	-34.6644
		1474.87	-34.6577
		1474.88	-34.6527
		1474.89	-34.6376
		1474.9	-34.6057
		1474.9	-34.5671
		1474.91	-34.5436
		1474.92	-34.5319
		1474.93	-34.5268
		1474.94	-34.5252
		1474.94	-34.5336
		1474.95	-34.5537
		1474.96	-34.5755
		1474.97	-34.604
		1474.98	-34.6376
		1474.98	-34.6661
		1474.99	-34.6762
		1475	-34.6779
		1475.01	-34.6711
		1475.02	-34.6426
		1475.02	-34.6091
		1475.03	-34.5822
		1475.04	-34.5671
		1475.05	-34.5638
		1475.06	-34.5621
		1475.06	-34.5721
		1475.07	-34.5973
		1475.08	-34.6258
		1475.09	-34.656
		1475.1	-34.6913
		1475.1	-34.7299
		1475.11	-34.7685
		1475.12	-34.807
		1475.13	-34.8205
		1475.14	-34.8188
		1475.14	-34.8054
		1475.15	-34.7852
		1475.16	-34.7735
		1475.17	-34.7617
		1475.18	-34.7433
		1475.18	-34.7248
		1475.19	-34.7181
		1475.2	-34.7164
		1475.21	-34.7248
		1475.22	-34.7534
		1475.22	-34.7819
		1475.23	-34.8003
		1475.24	-34.807
		1475.25	-34.8138
		1475.26	-34.8087
		1475.26	-34.7987
		1475.27	-34.7819
		1475.28	-34.7617
		1475.29	-34.7483
		1475.3	-34.7399
		1475.3	-34.7315
		1475.31	-34.7282
		1475.32	-34.7366
		1475.33	-34.7668
		1475.34	-34.8104
		1475.34	-34.8607
		1475.35	-34.9094
		1475.36	-34.9581
		1475.37	-35.005
		1475.38	-35.0419
		1475.38	-35.0721
		1475.39	-35.0923
		1475.4	-35.0906
		1475.41	-35.0755
		1475.42	-35.0587
		1475.42	-35.0403
		1475.43	-35.0252
		1475.44	-35.005
		1475.45	-34.9832
		1475.46	-34.9698
		1475.46	-34.9681
		1475.47	-34.9765
		1475.48	-34.9933
		1475.49	-35.0218
		1475.5	-35.047
		1475.5	-35.0688
		1475.51	-35.0956
		1475.52	-35.1141
		1475.53	-35.1258
		1475.54	-35.1275
		1475.54	-35.1124
		1475.55	-35.0889
		1475.56	-35.0721
		1475.57	-35.0537
		1475.58	-35.0319
		1475.58	-35.0285
		1475.59	-35.0336
		1475.6	-35.052
		1475.61	-35.0872
		1475.62	-35.1191
		1475.62	-35.1443
		1475.63	-35.1678
		1475.64	-35.1913
		1475.65	-35.2164
		1475.66	-35.2349
		1475.66	-35.2466
		1475.67	-35.2399
		1475.68	-35.2232
		1475.69	-35.2047
		1475.7	-35.1946
		1475.7	-35.1846
		1475.71	-35.1846
		1475.72	-35.1829
		1475.73	-35.1963
		1475.74	-35.2299
		1475.74	-35.2685
		1475.75	-35.3054
		1475.76	-35.3406
		1475.77	-35.3758
		1475.78	-35.4077
		1475.78	-35.4245
		1475.79	-35.4362
		1475.8	-35.4379
		1475.81	-35.4379
		1475.82	-35.4346
		1475.82	-35.4346
		1475.83	-35.4463
		1475.84	-35.4681
		1475.85	-35.4883
		1475.86	-35.5084
		1475.86	-35.5403
		1475.87	-35.5671
		1475.88	-35.5956
		1475.89	-35.6275
		1475.9	-35.651
		1475.9	-35.6728
		1475.91	-35.6946
		1475.92	-35.7232
		1475.93	-35.7483
		1475.94	-35.7651
		1475.94	-35.7819
		1475.95	-35.797
		1475.96	-35.8104
		1475.97	-35.8221
		1475.98	-35.8423
[truncated: 18,002 more rows]

## Sheet: Temperature sensing
	Fig.7.						wavelength (nm)	Reflectivity (dB)
	Temperature (°C)	Minima (nm)	Linear fit (nm)	Quadratic fit (nm)	Error (nm)			25°C	30°C	35°C	40°C	45°C	50°C	55°C	60°C	65°C	70°C	75°C	80°C	85°C	90°C	95°C	100°C	105°C	110°C
	25	1547.05	1547.06	1547.1	0.10279		1542	-36	-36	-36	-36	-36	-36	-36	-36	-36	-36.0117	-36.0017	-36.0184	-36.0643	-36.0695	-36.1025	-36.1249	-36.253	-36.6091
	30	1547.15	1547.16	1547.17	0.10279		1542.01	-36.0019	-36.002	-36.0014	-36.0012	-36.0011	-36.0008	-36.0007	-36.0004	-36.0003	-36.011	-36.0015	-36.0177	-36.0626	-36.0679	-36.1005	-36.1229	-36.2499	-36.6029
	35	1547.27	1547.26	1547.25	0.10279		1542.02	-36.0038	-36.0039	-36.0028	-36.0025	-36.0021	-36.0016	-36.0013	-36.0008	-36.0005	-36.0104	-36.0013	-36.017	-36.061	-36.0664	-36.0986	-36.1209	-36.2469	-36.5968
	40	1547.37	1547.36	1547.34	0.10279		1542.02	-36.0057	-36.0059	-36.0042	-36.0037	-36.0032	-36.0024	-36.002	-36.0013	-36.0008	-36.0097	-36.0011	-36.0162	-36.0593	-36.0648	-36.0966	-36.1189	-36.2438	-36.5908
	45	1547.45	1547.46	1547.44	0.10279		1542.03	-36.0076	-36.0079	-36.0056	-36.005	-36.0044	-36.0033	-36.0028	-36.0017	-36.0011	-36.0091	-36.0009	-36.0155	-36.0577	-36.0633	-36.0947	-36.1169	-36.2408	-36.5848
	50	1547.56	1547.55	1547.55	0.10279		1542.04	-36.0095	-36.01	-36.007	-36.0063	-36.0055	-36.0042	-36.0035	-36.0022	-36.0015	-36.0085	-36.0008	-36.0149	-36.0562	-36.0618	-36.0928	-36.115	-36.2378	-36.5788
	55	1547.64	1547.65	1547.66	0.10279		1542.05	-36.0115	-36.012	-36.0085	-36.0076	-36.0066	-36.005	-36.0042	-36.0027	-36.0018	-36.008	-36.0006	-36.0142	-36.0546	-36.0603	-36.0909	-36.113	-36.2348	-36.5728
	60	1547.82		1547.79	0.10279		1542.06	-36.0135	-36.0141	-36.01	-36.009	-36.0078	-36.0059	-36.005	-36.0032	-36.0021	-36.0074	-36.0005	-36.0135	-36.0531	-36.0588	-36.089	-36.1111	-36.2318	-36.5669
	65	1547.9		1547.92	0.10279		1542.06	-36.0155	-36.0162	-36.0114	-36.0103	-36.009	-36.0068	-36.0058	-36.0037	-36.0025	-36.0069	-36.0004	-36.0129	-36.0515	-36.0574	-36.0872	-36.1092	-36.2289	-36.561
	70	1548.19		1548.07	0.10279		1542.07	-36.0175	-36.0183	-36.0129	-36.0117	-36.0102	-36.0078	-36.0065	-36.0042	-36.0029	-36.0064	-36.0003	-36.0123	-36.0501	-36.0559	-36.0854	-36.1073	-36.2259	-36.5552
	75	1548.15		1548.22	0.10279		1542.08	-36.0195	-36.0204	-36.0145	-36.013	-36.0114	-36.0087	-36.0073	-36.0048	-36.0033	-36.0059	-36.0002	-36.0117	-36.0486	-36.0545	-36.0836	-36.1055	-36.223	-36.5494
	80	1548.41		1548.38	0.10279		1542.09	-36.0216	-36.0226	-36.016	-36.0144	-36.0126	-36.0096	-36.0082	-36.0053	-36.0037	-36.0054	-36.0001	-36.0111	-36.0471	-36.0531	-36.0818	-36.1036	-36.2202	-36.5436
	85	1548.51		1548.55	0.10279		1542.1	-36.0236	-36.0247	-36.0175	-36.0158	-36.0138	-36.0106	-36.009	-36.0059	-36.0041	-36.0049	-36.0001	-36.0105	-36.0457	-36.0517	-36.08	-36.1018	-36.2173	-36.5379
	90	1548.69		1548.73	0.10279		1542.1	-36.0257	-36.0269	-36.0191	-36.0172	-36.0151	-36.0116	-36.0099	-36.0065	-36.0046	-36.0045	-36	-36.0099	-36.0443	-36.0503	-36.0783	-36.1	-36.2145	-36.5322
	95	1548.86		1548.92	0.10279		1542.11	-36.0278	-36.0291	-36.0207	-36.0187	-36.0163	-36.0126	-36.0107	-36.0071	-36.005	-36.0041	-36	-36.0094	-36.0429	-36.049	-36.0766	-36.0982	-36.2116	-36.5265
	100	1549.08		1549.12	0.10279		1542.12	-36.0299	-36.0313	-36.0223	-36.0201	-36.0176	-36.0136	-36.0116	-36.0077	-36.0055	-36.0037	-36	-36.0088	-36.0416	-36.0477	-36.0748	-36.0964	-36.2088	-36.5209
	105	1549.34		1549.33	0.10279		1542.13	-36.0321	-36.0336	-36.0239	-36.0216	-36.0189	-36.0147	-36.0125	-36.0084	-36.006	-36.0033	-36	-36.0083	-36.0402	-36.0463	-36.0732	-36.0946	-36.2061	-36.5153
	110	1549.63		1549.55	0.10279		1542.14	-36.0342	-36.0358	-36.0255	-36.0231	-36.0202	-36.0157	-36.0134	-36.009	-36.0065	-36.003	-36	-36.0078	-36.0389	-36.0451	-36.0715	-36.0929	-36.2033	-36.5097
							1542.14	-36.0364	-36.0381	-36.0272	-36.0246	-36.0216	-36.0168	-36.0143	-36.0097	-36.007	-36.0026	-36.0001	-36.0073	-36.0376	-36.0438	-36.0698	-36.0912	-36.2006	-36.5041
							1542.15	-36.0386	-36.0404	-36.0288	-36.0261	-36.0229	-36.0179	-36.0153	-36.0104	-36.0075	-36.0023	-36.0001	-36.0069	-36.0364	-36.0425	-36.0682	-36.0895	-36.1978	-36.4986
							1542.16	-36.0408	-36.0427	-36.0305	-36.0276	-36.0243	-36.019	-36.0163	-36.0111	-36.0081	-36.002	-36.0002	-36.0064	-36.0351	-36.0413	-36.0666	-36.0878	-36.1952	-36.4932
							1542.17	-36.043	-36.0451	-36.0322	-36.0292	-36.0257	-36.0201	-36.0172	-36.0118	-36.0086	-36.0018	-36.0002	-36.006	-36.0339	-36.0401	-36.065	-36.0861	-36.1925	-36.4877
							1542.18	-36.0452	-36.0474	-36.0339	-36.0307	-36.0271	-36.0212	-36.0182	-36.0125	-36.0092	-36.0015	-36.0003	-36.0056	-36.0327	-36.0389	-36.0634	-36.0844	-36.1898	-36.4823
							1542.18	-36.0475	-36.0498	-36.0357	-36.0323	-36.0285	-36.0224	-36.0192	-36.0132	-36.0098	-36.0013	-36.0004	-36.0052	-36.0315	-36.0377	-36.0619	-36.0828	-36.1872	-36.477
							1542.19	-36.0497	-36.0522	-36.0374	-36.0339	-36.0299	-36.0235	-36.0203	-36.014	-36.0104	-36.0011	-36.0006	-36.0048	-36.0304	-36.0365	-36.0604	-36.0812	-36.1846	-36.4717
							1542.2	-36.052	-36.0546	-36.0392	-36.0355	-36.0313	-36.0247	-36.0213	-36.0148	-36.011	-36.0009	-36.0007	-36.0044	-36.0292	-36.0354	-36.0589	-36.0796	-36.182	-36.4664
							1542.21	-36.0543	-36.0571	-36.0409	-36.0372	-36.0328	-36.0259	-36.0224	-36.0156	-36.0116	-36.0007	-36.0008	-36.004	-36.0281	-36.0342	-36.0574	-36.078	-36.1794	-36.4611
							1542.22	-36.0566	-36.0595	-36.0427	-36.0388	-36.0343	-36.0271	-36.0234	-36.0164	-36.0123	-36.0005	-36.001	-36.0037	-36.027	-36.0331	-36.0559	-36.0764	-36.1768	-36.4559
							1542.22	-36.059	-36.062	-36.0445	-36.0405	-36.0357	-36.0283	-36.0245	-36.0172	-36.0129	-36.0004	-36.0012	-36.0034	-36.026	-36.032	-36.0544	-36.0748	-36.1743	-36.4507
							1542.23	-36.0613	-36.0645	-36.0464	-36.0422	-36.0373	-36.0296	-36.0256	-36.018	-36.0136	-36.0003	-36.0014	-36.003	-36.0249	-36.031	-36.053	-36.0733	-36.1718	-36.4455
							1542.24	-36.0637	-36.067	-36.0482	-36.0439	-36.0388	-36.0308	-36.0267	-36.0189	-36.0143	-36.0002	-36.0016	-36.0027	-36.0239	-36.0299	-36.0516	-36.0718	-36.1693	-36.4404
							1542.25	-36.0661	-36.0695	-36.0501	-36.0456	-36.0403	-36.0321	-36.0279	-36.0197	-36.015	-36.0001	-36.0018	-36.0025	-36.0229	-36.0289	-36.0502	-36.0703	-36.1668	-36.4353
							1542.26	-36.0685	-36.0721	-36.052	-36.0473	-36.0419	-36.0334	-36.029	-36.0206	-36.0157	-36.0001	-36.002	-36.0022	-36.0219	-36.0278	-36.0488	-36.0688	-36.1644	-36.4302
							1542.26	-36.0709	-36.0746	-36.0539	-36.049	-36.0434	-36.0347	-36.0302	-36.0215	-36.0164	-36	-36.0023	-36.0019	-36.021	-36.0268	-36.0475	-36.0673	-36.1619	-36.4252
							1542.27	-36.0734	-36.0772	-36.0558	-36.0508	-36.045	-36.0361	-36.0314	-36.0224	-36.0172	-36	-36.0026	-36.0017	-36.02	-36.0258	-36.0461	-36.0659	-36.1595	-36.4202
							1542.28	-36.0758	-36.0798	-36.0577	-36.0526	-36.0466	-36.0374	-36.0326	-36.0233	-36.018	-36	-36.0028	-36.0015	-36.0191	-36.0249	-36.0448	-36.0644	-36.1571	-36.4152
							1542.29	-36.0783	-36.0824	-36.0596	-36.0544	-36.0482	-36.0388	-36.0338	-36.0243	-36.0187	-36	-36.0031	-36.0013	-36.0182	-36.0239	-36.0435	-36.063	-36.1547	-36.4103
							1542.3	-36.0808	-36.0851	-36.0616	-36.0562	-36.0499	-36.0401	-36.035	-36.0252	-36.0195	-36.0001	-36.0035	-36.0011	-36.0174	-36.023	-36.0422	-36.0616	-36.1524	-36.4054
							1542.3	-36.0833	-36.0878	-36.0636	-36.058	-36.0515	-36.0415	-36.0363	-36.0262	-36.0203	-36.0001	-36.0038	-36.0009	-36.0165	-36.0221	-36.041	-36.0602	-36.1501	-36.4005
							1542.31	-36.0858	-36.0904	-36.0656	-36.0599	-36.0532	-36.0429	-36.0375	-36.0272	-36.0211	-36.0002	-36.0041	-36.0007	-36.0157	-36.0212	-36.0397	-36.0589	-36.1477	-36.3957
							1542.32	-36.0883	-36.0931	-36.0676	-36.0617	-36.0548	-36.0444	-36.0388	-36.0282	-36.022	-36.0003	-36.0045	-36.0006	-36.0149	-36.0203	-36.0385	-36.0575	-36.1454	-36.3909
							1542.33	-36.0909	-36.0959	-36.0696	-36.0636	-36.0565	-36.0458	-36.0401	-36.0292	-36.0228	-36.0004	-36.0048	-36.0005	-36.0141	-36.0195	-36.0373	-36.0562	-36.1432	-36.3861
							1542.34	-36.0935	-36.0986	-36.0717	-36.0655	-36.0582	-36.0473	-36.0414	-36.0302	-36.0237	-36.0006	-36.0052	-36.0004	-36.0133	-36.0186	-36.0361	-36.0549	-36.1409	-36.3814
							1542.34	-36.0961	-36.1014	-36.0738	-36.0674	-36.06	-36.0488	-36.0427	-36.0312	-36.0246	-36.0007	-36.0056	-36.0003	-36.0126	-36.0178	-36.0349	-36.0536	-36.1387	-36.3766
							1542.35	-36.0987	-36.1042	-36.0758	-36.0694	-36.0617	-36.0503	-36.0441	-36.0323	-36.0255	-36.0009	-36.006	-36.0002	-36.0119	-36.017	-36.0338	-36.0523	-36.1364	-36.372
							1542.36	-36.1013	-36.107	-36.0779	-36.0713	-36.0635	-36.0518	-36.0454	-36.0334	-36.0264	-36.0011	-36.0065	-36.0001	-36.0112	-36.0162	-36.0327	-36.051	-36.1342	-36.3673
							1542.37	-36.1039	-36.1098	-36.0801	-36.0733	-36.0652	-36.0533	-36.0468	-36.0344	-36.0273	-36.0013	-36.0069	-36.0001	-36.0105	-36.0155	-36.0316	-36.0498	-36.1321	-36.3627
							1542.38	-36.1066	-36.1126	-36.0822	-36.0753	-36.067	-36.0548	-36.0482	-36.0355	-36.0282	-36.0016	-36.0074	-36	-36.0099	-36.0147	-36.0305	-36.0485	-36.1299	-36.3581
							1542.38	-36.1093	-36.1155	-36.0844	-36.0773	-36.0688	-36.0564	-36.0496	-36.0367	-36.0292	-36.0018	-36.0079	-36	-36.0092	-36.014	-36.0294	-36.0473	-36.1278	-36.3536
							1542.39	-36.112	-36.1184	-36.0865	-36.0793	-36.0707	-36.058	-36.051	-36.0378	-36.0301	-36.0021	-36.0083	-36	-36.0086	-36.0133	-36.0284	-36.0461	-36.1256	-36.3491
							1542.4	-36.1147	-36.1213	-36.0887	-36.0813	-36.0725	-36.0596	-36.0524	-36.0389	-36.0311	-36.0024	-36.0088	-36	-36.008	-36.0126	-36.0273	-36.0449	-36.1235	-36.3446
							1542.41	-36.1174	-36.1242	-36.0909	-36.0834	-36.0744	-36.0612	-36.0539	-36.0401	-36.0321	-36.0028	-36.0094	-36	-36.0075	-36.0119	-36.0263	-36.0438	-36.1215	-36.3401
							1542.42	-36.1201	-36.1271	-36.0931	-36.0854	-36.0762	-36.0628	-36.0553	-36.0413	-36.0331	-36.0031	-36.0099	-36.0001	-36.0069	-36.0112	-36.0253	-36.0426	-36.1194	-36.3357
							1542.42	-36.1229	-36.1301	-36.0954	-36.0875	-36.0781	-36.0645	-36.0568	-36.0425	-36.0341	-36.0035	-36.0104	-36.0001	-36.0064	-36.0106	-36.0244	-36.0415	-36.1173	-36.3313
							1542.43	-36.1257	-36.1331	-36.0976	-36.0896	-36.08	-36.0661	-36.0583	-36.0437	-36.0352	-36.0038	-36.011	-36.0002	-36.0059	-36.01	-36.0234	-36.0404	-36.1153	-36.327
							1542.44	-36.1285	-36.1361	-36.0999	-36.0917	-36.082	-36.0678	-36.0598	-36.0449	-36.0362	-36.0042	-36.0116	-36.0003	-36.0054	-36.0094	-36.0225	-36.0393	-36.1133	-36.3226
							1542.45	-36.1313	-36.1391	-36.1022	-36.0939	-36.0839	-36.0695	-36.0614	-36.0461	-36.0373	-36.0047	-36.0122	-36.0004	-36.0049	-36.0088	-36.0216	-36.0382	-36.1113	-36.3183
							1542.46	-36.1341	-36.1421	-36.1045	-36.096	-36.0858	-36.0712	-36.0629	-36.0474	-36.0384	-36.0051	-36.0128	-36.0005	-36.0045	-36.0082	-36.0207	-36.0371	-36.1094	-36.3141
							1542.46	-36.1369	-36.1452	-36.1069	-36.0982	-36.0878	-36.073	-36.0645	-36.0486	-36.0394	-36.0056	-36.0134	-36.0006	-36.0041	-36.0077	-36.0198	-36.0361	-36.1074	-36.3098
							1542.47	-36.1398	-36.1483	-36.1092	-36.1004	-36.0898	-36.0747	-36.066	-36.0499	-36.0405	-36.006	-36.014	-36.0008	-36.0037	-36.0072	-36.0189	-36.035	-36.1055	-36.3056
							1542.48	-36.1427	-36.1514	-36.1116	-36.1026	-36.0918	-36.0765	-36.0676	-36.0512	-36.0417	-36.0065	-36.0147	-36.001	-36.0033	-36.0067	-36.0181	-36.034	-36.1036	-36.3015
							1542.49	-36.1456	-36.1545	-36.114	-36.1048	-36.0938	-36.0783	-36.0692	-36.0525	-36.0428	-36.0071	-36.0153	-36.0011	-36.0029	-36.0062	-36.0173	-36.033	-36.1017	-36.2973
							1542.5	-36.1485	-36.1576	-36.1164	-36.107	-36.0959	-36.0801	-36.0709	-36.0538	-36.044	-36.0076	-36.016	-36.0013	-36.0026	-36.0057	-36.0165	-36.032	-36.0998	-36.2932
							1542.5	-36.1514	-36.1608	-36.1188	-36.1093	-36.0979	-36.0819	-36.0725	-36.0552	-36.0451	-36.0082	-36.0167	-36.0015	-36.0023	-36.0053	-36.0157	-36.031	-36.0979	-36.2891
							1542.51	-36.1544	-36.164	-36.1212	-36.1116	-36.1	-36.0837	-36.0741	-36.0565	-36.0463	-36.0087	-36.0174	-36.0018	-36.002	-36.0048	-36.0149	-36.0301	-36.0961	-36.2851
							1542.52	-36.1573	-36.1672	-36.1237	-36.1139	-36.1021	-36.0856	-36.0758	-36.0579	-36.0475	-36.0093	-36.0181	-36.002	-36.0017	-36.0044	-36.0142	-36.0291	-36.0943	-36.2811
							1542.53	-36.1603	-36.1704	-36.1261	-36.1162	-36.1042	-36.0874	-36.0775	-36.0593	-36.0487	-36.01	-36.0189	-36.0023	-36.0015	-36.004	-36.0135	-36.0282	-36.0925	-36.2771
							1542.54	-36.1633	-36.1737	-36.1286	-36.1185	-36.1063	-36.0893	-36.0792	-36.0607	-36.0499	-36.0106	-36.0196	-36.0025	-36.0012	-36.0036	-36.0128	-36.0273	-36.0907	-36.2731
							1542.54	-36.1663	-36.1769	-36.1311	-36.1208	-36.1084	-36.0912	-36.0809	-36.0621	-36.0511	-36.0112	-36.0204	-36.0028	-36.001	-36.0033	-36.0121	-36.0264	-36.0889	-36.2692
							1542.55	-36.1693	-36.1802	-36.1337	-36.1232	-36.1106	-36.0931	-36.0826	-36.0635	-36.0524	-36.0119	-36.0211	-36.0031	-36.0008	-36.0029	-36.0114	-36.0255	-36.0872	-36.2653
							1542.56	-36.1724	-36.1835	-36.1362	-36.1255	-36.1127	-36.0951	-36.0844	-36.065	-36.0537	-36.0126	-36.0219	-36.0035	-36.0007	-36.0026	-36.0108	-36.0247	-36.0854	-36.2614
							1542.57	-36.1755	-36.1868	-36.1388	-36.1279	-36.1149	-36.097	-36.0861	-36.0664	-36.0549	-36.0133	-36.0227	-36.0038	-36.0005	-36.0023	-36.0101	-36.0238	-36.0837	-36.2576
							1542.58	-36.1785	-36.1902	-36.1413	-36.1303	-36.1171	-36.099	-36.0879	-36.0679	-36.0562	-36.0141	-36.0236	-36.0041	-36.0004	-36.002	-36.0095	-36.023	-36.0821	-36.2538
							1542.58	-36.1816	-36.1936	-36.1439	-36.1328	-36.1193	-36.101	-36.0897	-36.0694	-36.0575	-36.0148	-36.0244	-36.0045	-36.0003	-36.0018	-36.0089	-36.0222	-36.0804	-36.25
							1542.59	-36.1848	-36.1969	-36.1465	-36.1352	-36.1216	-36.103	-36.0915	-36.0709	-36.0588	-36.0156	-36.0252	-36.0049	-36.0002	-36.0015	-36.0084	-36.0214	-36.0787	-36.2463
							1542.6	-36.1879	-36.2004	-36.1492	-36.1377	-36.1238	-36.105	-36.0933	-36.0724	-36.0602	-36.0164	-36.0261	-36.0053	-36.0001	-36.0013	-36.0078	-36.0206	-36.0771	-36.2426
							1542.61	-36.1911	-36.2038	-36.1518	-36.1401	-36.1261	-36.107	-36.0952	-36.0739	-36.0615	-36.0172	-36.027	-36.0057	-36	-36.0011	-36.0073	-36.0198	-36.0755	-36.2389
							1542.62	-36.1942	-36.2072	-36.1545	-36.1426	-36.1284	-36.1091	-36.097	-36.0755	-36.0629	-36.0181	-36.0279	-36.0061	-36	-36.0009	-36.0068	-36.0191	-36.0739	-36.2352
							1542.62	-36.1974	-36.2107	-36.1572	-36.1451	-36.1307	-36.1112	-36.0989	-36.077	-36.0643	-36.0189	-36.0288	-36.0066	-36	-36.0007	-36.0063	-36.0183	-36.0723	-36.2316
							1542.63	-36.2006	-36.2142	-36.1599	-36.1476	-36.133	-36.1133	-36.1008	-36.0786	-36.0657	-36.0198	-36.0297	-36.007	-36	-36.0006	-36.0058	-36.0176	-36.0707	-36.228
							1542.64	-36.2039	-36.2177	-36.1626	-36.1502	-36.1353	-36.1154	-36.1027	-36.0802	-36.0671	-36.0207	-36.0306	-36.0075	-36	-36.0004	-36.0053	-36.0169	-36.0692	-36.2244
							1542.65	-36.2071	-36.2213	-36.1653	-36.1527	-36.1377	-36.1175	-36.1046	-36.0818	-36.0685	-36.0216	-36.0316	-36.008	-36.0001	-36.0003	-36.0049	-36.0162	-36.0677	-36.2209
							1542.66	-36.2104	-36.2248	-36.1681	-36.1553	-36.14	-36.1196	-36.1065	-36.0834	-36.0699	-36.0226	-36.0325	-36.0085	-36.0002	-36.0002	-36.0045	-36.0155	-36.0661	-36.2174
							1542.66	-36.2137	-36.2284	-36.1709	-36.1579	-36.1424	-36.1218	-36.1084	-36.0851	-36.0714	-36.0235	-36.0335	-36.009	-36.0002	-36.0001	-36.0041	-36.0149	-36.0647	-36.2139
							1542.67	-36.217	-36.232	-36.1737	-36.1605	-36.1448	-36.1239	-36.1104	-36.0867	-36.0728	-36.0245	-36.0345	-36.0096	-36.0004	-36.0001	-36.0037	-36.0142	-36.0632	-36.2105
							1542.68	-36.2203	-36.2356	-36.1765	-36.1631	-36.1473	-36.1261	-36.1124	-36.0884	-36.0743	-36.0255	-36.0355	-36.0101	-36.0005	-36	-36.0033	-36.0136	-36.0617	-36.207
							1542.69	-36.2236	-36.2393	-36.1793	-36.1658	-36.1497	-36.1283	-36.1144	-36.0901	-36.0758	-36.0265	-36.0365	-36.0107	-36.0006	-36	-36.003	-36.013	-36.0603	-36.2036
							1542.7	-36.227	-36.2429	-36.1821	-36.1684	-36.1521	-36.1306	-36.1164	-36.0918	-36.0773	-36.0276	-36.0375	-36.0113	-36.0008	-36	-36.0027	-36.0124	-36.0589	-36.2003
							1542.7	-36.2303	-36.2466	-36.185	-36.1711	-36.1546	-36.1328	-36.1184	-36.0935	-36.0789	-36.0286	-36.0386	-36.0119	-36.001	-36	-36.0024	-36.0118	-36.0575	-36.197
							1542.71	-36.2337	-36.2503	-36.1879	-36.1738	-36.1571	-36.135	-36.1204	-36.0952	-36.0804	-36.0297	-36.0396	-36.0125	-36.0012	-36.0001	-36.0021	-36.0112	-36.0561	-36.1936
							1542.72	-36.2372	-36.254	-36.1908	-36.1765	-36.1596	-36.1373	-36.1225	-36.097	-36.0819	-36.0308	-36.0407	-36.0131	-36.0014	-36.0001	-36.0018	-36.0107	-36.0547	-36.1904
							1542.73	-36.2406	-36.2578	-36.1937	-36.1792	-36.1621	-36.1396	-36.1245	-36.0987	-36.0835	-36.0319	-36.0418	-36.0137	-36.0017	-36.0002	-36.0016	-36.0101	-36.0534	-36.1871
							1542.74	-36.244	-36.2616	-36.1966	-36.182	-36.1647	-36.1419	-36.1266	-36.1005	-36.0851	-36.033	-36.0429	-36.0144	-36.002	-36.0003	-36.0013	-36.0096	-36.052	-36.1839
							1542.74	-36.2475	-36.2654	-36.1996	-36.1847	-36.1672	-36.1442	-36.1287	-36.1023	-36.0867	-36.0342	-36.044	-36.0151	-36.0022	-36.0004	-36.0011	-36.0091	-36.0507	-36.1807
							1542.75	-36.251	-36.2692	-36.2026	-36.1875	-36.1698	-36.1466	-36.1308	-36.1041	-36.0883	-36.0354	-36.0452	-36.0158	-36.0026	-36.0005	-36.0009	-36.0086	-36.0494	-36.1776
							1542.76	-36.2545	-36.273	-36.2055	-36.1903	-36.1724	-36.1489	-36.1329	-36.1059	-36.0899	-36.0366	-36.0463	-36.0165	-36.0029	-36.0007	-36.0007	-36.0081	-36.0481	-36.1744
							1542.77	-36.258	-36.2769	-36.2086	-36.1931	-36.175	-36.1513	-36.1351	-36.1078	-36.0916	-36.0378	-36.0475	-36.0172	-36.0032	-36.0008	-36.0006	-36.0076	-36.0469	-36.1713
							1542.78	-36.2616	-36.2808	-36.2116	-36.1959	-36.1776	-36.1537	-36.1372	-36.1096	-36.0932	-36.039	-36.0486	-36.018	-36.0036	-36.001	-36.0004	-36.0072	-36.0456	-36.1683
							1542.78	-36.2652	-36.2847	-36.2146	-36.1987	-36.1802	-36.1561	-36.1394	-36.1115	-36.0949	-36.0403	-36.0498	-36.0187	-36.004	-36.0012	-36.0003	-36.0067	-36.0444	-36.1652
							1542.79	-36.2688	-36.2886	-36.2177	-36.2016	-36.1829	-36.1585	-36.1416	-36.1134	-36.0966	-36.0416	-36.051	-36.0195	-36.0044	-36.0014	-36.0002	-36.0063	-36.0432	-36.1622
							1542.8	-36.2724	-36.2925	-36.2208	-36.2045	-36.1856	-36.1609	-36.1438	-36.1153	-36.0983	-36.0429	-36.0522	-36.0203	-36.0048	-36.0017	-36.0001	-36.0059	-36.042	-36.1592
							1542.81	-36.276	-36.2965	-36.2239	-36.2074	-36.1883	-36.1634	-36.146	-36.1172	-36.1	-36.0442	-36.0535	-36.0211	-36.0053	-36.0019	-36.0001	-36.0055	-36.0408	-36.1563
							1542.82	-36.2797	-36.3005	-36.227	-36.2103	-36.191	-36.1658	-36.1482	-36.1191	-36.1018	-36.0456	-36.0547	-36.0219	-36.0058	-36.0022	-36	-36.0051	-36.0397	-36.1533
							1542.82	-36.2833	-36.3045	-36.2301	-36.2132	-36.1937	-36.1683	-36.1504	-36.1211	-36.1035	-36.0469	-36.056	-36.0227	-36.0063	-36.0025	-36	-36.0047	-36.0385	-36.1504
							1542.83	-36.287	-36.3086	-36.2333	-36.2161	-36.1965	-36.1708	-36.1527	-36.1231	-36.1053	-36.0483	-36.0572	-36.0236	-36.0068	-36.0028	-36	-36.0044	-36.0374	-36.1476
							1542.84	-36.2907	-36.3126	-36.2365	-36.2191	-36.1992	-36.1733	-36.155	-36.125	-36.1071	-36.0497	-36.0585	-36.0244	-36.0073	-36.0032	-36	-36.004	-36.0363	-36.1447
							1542.85	-36.2945	-36.3167	-36.2397	-36.2221	-36.202	-36.1759	-36.1572	-36.127	-36.1089	-36.0511	-36.0598	-36.0253	-36.0079	-36.0035	-36	-36.0037	-36.0352	-36.1419
							1542.86	-36.2982	-36.3208	-36.2429	-36.2251	-36.2048	-36.1784	-36.1595	-36.129	-36.1107	-36.0526	-36.0611	-36.0262	-36.0084	-36.0039	-36.0001	-36.0034	-36.0341	-36.1391
							1542.86	-36.302	-36.325	-36.2461	-36.2281	-36.2076	-36.181	-36.1619	-36.1311	-36.1125	-36.054	-36.0625	-36.0271	-36.009	-36.0043	-36.0001	-36.0031	-36.0331	-36.1364
							1542.87	-36.3058	-36.3291	-36.2494	-36.2311	-36.2104	-36.1836	-36.1642	-36.1331	-36.1144	-36.0555	-36.0638	-36.0281	-36.0097	-36.0047	-36.0002	-36.0028	-36.032	-36.1336
							1542.88	-36.3096	-36.3333	-36.2526	-36.2342	-36.2133	-36.1862	-36.1665	-36.1352	-36.1162	-36.057	-36.0652	-36.029	-36.0103	-36.0052	-36.0003	-36.0025	-36.031	-36.1309
							1542.89	-36.3134	-36.3375	-36.2559	-36.2372	-36.2162	-36.1888	-36.1689	-36.1373	-36.1181	-36.0586	-36.0665	-36.03	-36.0109	-36.0056	-36.0005	-36.0023	-36.03	-36.1282
							1542.9	-36.3173	-36.3417	-36.2592	-36.2403	-36.2191	-36.1914	-36.1713	-36.1394	-36.12	-36.0601	-36.0679	-36.031	-36.0116	-36.0061	-36.0006	-36.002	-36.029	-36.1256
							1542.9	-36.3212	-36.346	-36.2625	-36.2434	-36.222	-36.1941	-36.1737	-36.1415	-36.1219	-36.0617	-36.0693	-36.032	-36.0123	-36.0066	-36.0007	-36.0018	-36.028	-36.123
							1542.91	-36.3251	-36.3502	-36.2659	-36.2465	-36.2249	-36.1967	-36.1761	-36.1436	-36.1238	-36.0633	-36.0708	-36.033	-36.013	-36.0071	-36.0009	-36.0016	-36.0271	-36.1204
							1542.92	-36.329	-36.3545	-36.2693	-36.2496	-36.2278	-36.1994	-36.1785	-36.1457	-36.1257	-36.0649	-36.0722	-36.034	-36.0138	-36.0076	-36.0011	-36.0014	-36.0261	-36.1178
							1542.93	-36.3329	-36.3588	-36.2726	-36.2528	-36.2308	-36.2021	-36.1809	-36.1479	-36.1277	-36.0665	-36.0736	-36.035	-36.0145	-36.0082	-36.0013	-36.0012	-36.0252	-36.1153
							1542.94	-36.3369	-36.3632	-36.276	-36.256	-36.2338	-36.2048	-36.1834	-36.1501	-36.1297	-36.0681	-36.0751	-36.0361	-36.0153	-36.0087	-36.0015	-36.001	-36.0243	-36.1128
							1542.94	-36.3409	-36.3675	-36.2795	-36.2591	-36.2368	-36.2075	-36.1859	-36.1523	-36.1317	-36.0698	-36.0766	-36.0372	-36.0161	-36.0093	-36.0018	-36.0008	-36.0234	-36.1103
							1542.95	-36.3449	-36.3719	-36.2829	-36.2623	-36.2398	-36.2103	-36.1883	-36.1545	-36.1337	-36.0715	-36.0781	-36.0383	-36.017	-36.0099	-36.0021	-36.0007	-36.0226	-36.1078
							1542.96	-36.3489	-36.3763	-36.2864	-36.2656	-36.2428	-36.213	-36.1908	-36.1567	-36.1357	-36.0732	-36.0796	-36.0394	-36.0178	-36.0105	-36.0023	-36.0006	-36.0217	-36.1054
							1542.97	-36.353	-36.3808	-36.2899	-36.2688	-36.2458	-36.2158	-36.1934	-36.1589	-36.1377	-36.075	-36.0811	-36.0405	-36.0187	-36.0112	-36.0026	-36.0004	-36.0209	-36.103
							1542.98	-36.357	-36.3852	-36.2934	-36.2721	-36.2489	-36.2186	-36.1959	-36.1612	-36.1398	-36.0767	-36.0826	-36.0416	-36.0196	-36.0118	-36.003	-36.0003	-36.02	-36.1006
							1542.98	-36.3611	-36.3897	-36.2969	-36.2753	-36.252	-36.2214	-36.1984	-36.1635	-36.1418	-36.0785	-36.0842	-36.0428	-36.0205	-36.0125	-36.0033	-36.0003	-36.0192	-36.0983
							1542.99	-36.3653	-36.3942	-36.3004	-36.2786	-36.2551	-36.2242	-36.201	-36.1657	-36.1439	-36.0803	-36.0857	-36.044	-36.0214	-36.0132	-36.0036	-36.0002	-36.0184	-36.096
							1543	-36.3694	-36.3987	-36.304	-36.2819	-36.2582	-36.2271	-36.2036	-36.1681	-36.146	-36.0821	-36.0873	-36.0451	-36.0223	-36.0139	-36.004	-36.0001	-36.0177	-36.0937
							1543.01	-36.3736	-36.4033	-36.3076	-36.2853	-36.2614	-36.2299	-36.2062	-36.1704	-36.1481	-36.084	-36.0889	-36.0464	-36.0233	-36.0146	-36.0044	-36.0001	-36.0169	-36.0914
							1543.02	-36.3777	-36.4079	-36.3112	-36.2886	-36.2645	-36.2328	-36.2088	-36.1727	-36.1503	-36.0858	-36.0905	-36.0476	-36.0243	-36.0154	-36.0048	-36	-36.0162	-36.0892
							1543.02	-36.3819	-36.4125	-36.3148	-36.292	-36.2677	-36.2357	-36.2114	-36.1751	-36.1524	-36.0877	-36.0922	-36.0488	-36.0253	-36.0162	-36.0052	-36	-36.0154	-36.087
							1543.03	-36.3862	-36.4171	-36.3184	-36.2954	-36.2709	-36.2386	-36.2141	-36.1774	-36.1546	-36.0896	-36.0938	-36.0501	-36.0264	-36.0169	-36.0057	-36	-36.0147	-36.0848
							1543.04	-36.3904	-36.4218	-36.3221	-36.2988	-36.2741	-36.2415	-36.2167	-36.1798	-36.1568	-36.0915	-36.0955	-36.0513	-36.0274	-36.0178	-36.0061	-36	-36.014	-36.0826
							1543.05	-36.3947	-36.4264	-36.3258	-36.3022	-36.2774	-36.2445	-36.2194	-36.1822	-36.159	-36.0935	-36.0971	-36.0526	-36.0285	-36.0186	-36.0066	-36	-36.0134	-36.0805
							1543.06	-36.399	-36.4311	-36.3295	-36.3057	-36.2806	-36.2475	-36.2221	-36.1847	-36.1612	-36.0955	-36.0988	-36.0539	-36.0296	-36.0194	-36.0071	-36.0001	-36.0127	-36.0784
							1543.06	-36.4033	-36.4359	-36.3332	-36.3091	-36.2839	-36.2504	-36.2248	-36.1871	-36.1634	-36.0974	-36.1005	-36.0553	-36.0307	-36.0203	-36.0076	-36.0001	-36.0121	-36.0764
							1543.07	-36.4076	-36.4406	-36.3369	-36.3126	-36.2872	-36.2534	-36.2275	-36.1896	-36.1656	-36.0995	-36.1022	-36.0566	-36.0319	-36.0212	-36.0082	-36.0002	-36.0115	-36.0743
							1543.08	-36.412	-36.4454	-36.3407	-36.3161	-36.2905	-36.2564	-36.2303	-36.192	-36.1679	-36.1015	-36.104	-36.058	-36.0331	-36.0221	-36.0087	-36.0002	-36.0108	-36.0723
							1543.09	-36.4164	-36.4502	-36.3445	-36.3196	-36.2938	-36.2595	-36.233	-36.1945	-36.1702	-36.1035	-36.1057	-36.0593	-36.0343	-36.023	-36.0093	-36.0003	-36.0102	-36.0703
							1543.1	-36.4208	-36.455	-36.3483	-36.3232	-36.2972	-36.2625	-36.2358	-36.197	-36.1725	-36.1056	-36.1075	-36.0607	-36.0355	-36.0239	-36.0099	-36.0004	-36.0097	-36.0683
							1543.1	-36.4252	-36.4599	-36.3521	-36.3267	-36.3006	-36.2656	-36.2386	-36.1996	-36.1748	-36.1077	-36.1093	-36.0621	-36.0367	-36.0249	-36.0105	-36.0006	-36.0091	-36.0664
							1543.11	-36.4297	-36.4648	-36.3559	-36.3303	-36.3039	-36.2687	-36.2414	-36.2021	-36.1771	-36.1098	-36.1111	-36.0635	-36.038	-36.0259	-36.0111	-36.0007	-36.0086	-36.0645
							1543.12	-36.4342	-36.4697	-36.3598	-36.3339	-36.3074	-36.2718	-36.2443	-36.2047	-36.1795	-36.112	-36.1129	-36.065	-36.0393	-36.0269	-36.0117	-36.0008	-36.008	-36.0626
							1543.13	-36.4387	-36.4746	-36.3637	-36.3375	-36.3108	-36.2749	-36.2471	-36.2072	-36.1818	-36.1142	-36.1147	-36.0664	-36.0406	-36.0279	-36.0124	-36.001	-36.0075	-36.0608
							1543.14	-36.4432	-36.4796	-36.3676	-36.3412	-36.3142	-36.278	-36.25	-36.2098	-36.1842	-36.1163	-36.1166	-36.0679	-36.0419	-36.0289	-36.0131	-36.0012	-36.007	-36.0589
							1543.14	-36.4477	-36.4845	-36.3715	-36.3448	-36.3177	-36.2812	-36.2528	-36.2124	-36.1866	-36.1185	-36.1184	-36.0694	-36.0432	-36.0299	-36.0137	-36.0013	-36.0066	-36.0571
							1543.15	-36.4523	-36.4895	-36.3755	-36.3485	-36.3212	-36.2844	-36.2557	-36.2151	-36.189	-36.1208	-36.1203	-36.0709	-36.0446	-36.031	-36.0145	-36.0015	-36.0061	-36.0554
							1543.16	-36.4569	-36.4946	-36.3794	-36.3522	-36.3247	-36.2876	-36.2587	-36.2177	-36.1914	-36.123	-36.1222	-36.0725	-36.046	-36.0321	-36.0152	-36.0018	-36.0057	-36.0536
							1543.17	-36.4615	-36.4996	-36.3834	-36.3559	-36.3282	-36.2908	-36.2616	-36.2204	-36.1939	-36.1253	-36.1241	-36.074	-36.0474	-36.0332	-36.0159	-36.002	-36.0052	-36.0519
							1543.18	-36.4661	-36.5047	-36.3874	-36.3597	-36.3318	-36.294	-36.2646	-36.2231	-36.1963	-36.1276	-36.1261	-36.0756	-36.0489	-36.0343	-36.0167	-36.0022	-36.0048	-36.0502
							1543.18	-36.4708	-36.5098	-36.3915	-36.3634	-36.3353	-36.2972	-36.2675	-36.2258	-36.1988	-36.1299	-36.128	-36.0771	-36.0503	-36.0355	-36.0175	-36.0025	-36.0044	-36.0486
							1543.19	-36.4755	-36.515	-36.3955	-36.3672	-36.3389	-36.3005	-36.2705	-36.2285	-36.2013	-36.1323	-36.13	-36.0787	-36.0518	-36.0366	-36.0183	-36.0028	-36.0041	-36.0469
							1543.2	-36.4802	-36.5201	-36.3996	-36.371	-36.3425	-36.3038	-36.2735	-36.2312	-36.2038	-36.1346	-36.1319	-36.0803	-36.0533	-36.0378	-36.0191	-36.003	-36.0037	-36.0453
							1543.21	-36.4849	-36.5253	-36.4037	-36.3748	-36.3461	-36.3071	-36.2766	-36.234	-36.2063	-36.137	-36.1339	-36.082	-36.0548	-36.039	-36.0199	-36.0033	-36.0033	-36.0437
							1543.22	-36.4897	-36.5305	-36.4078	-36.3787	-36.3498	-36.3104	-36.2796	-36.2367	-36.2089	-36.1394	-36.1359	-36.0836	-36.0564	-36.0402	-36.0208	-36.0036	-36.003	-36.0422
							1543.22	-36.4945	-36.5358	-36.4119	-36.3825	-36.3535	-36.3138	-36.2827	-36.2395	-36.2115	-36.1418	-36.138	-36.0853	-36.058	-36.0414	-36.0216	-36.004	-36.0027	-36.0407
							1543.23	-36.4993	-36.5411	-36.4161	-36.3864	-36.3571	-36.3171	-36.2858	-36.2423	-36.214	-36.1443	-36.14	-36.087	-36.0596	-36.0427	-36.0225	-36.0043	-36.0024	-36.0392
							1543.24	-36.5041	-36.5464	-36.4203	-36.3903	-36.3609	-36.3205	-36.2889	-36.2452	-36.2166	-36.1468	-36.1421	-36.0887	-36.0612	-36.0439	-36.0234	-36.0047	-36.0021	-36.0377
							1543.25	-36.509	-36.5517	-36.4245	-36.3943	-36.3646	-36.3239	-36.292	-36.248	-36.2192	-36.1493	-36.1441	-36.0904	-36.0628	-36.0452	-36.0243	-36.005	-36.0019	-36.0362
							1543.26	-36.5138	-36.557	-36.4287	-36.3982	-36.3683	-36.3274	-36.2951	-36.2508	-36.2219	-36.1518	-36.1462	-36.0921	-36.0645	-36.0465	-36.0253	-36.0054	-36.0016	-36.0348
							1543.26	-36.5187	-36.5624	-36.4329	-36.4022	-36.3721	-36.3308	-36.2983	-36.2537	-36.2245	-36.1543	-36.1483	-36.0939	-36.0662	-36.0478	-36.0262	-36.0058	-36.0014	-36.0334
							1543.27	-36.5236	-36.5678	-36.4372	-36.4062	-36.3759	-36.3343	-36.3015	-36.2566	-36.2272	-36.1569	-36.1505	-36.0957	-36.0679	-36.0492	-36.0272	-36.0062	-36.0012	-36.0321
							1543.28	-36.5286	-36.5733	-36.4415	-36.4102	-36.3797	-36.3377	-36.3047	-36.2595	-36.2299	-36.1595	-36.1526	-36.0974	-36.0697	-36.0505	-36.0282	-36.0066	-36.001	-36.0307
							1543.29	-36.5336	-36.5787	-36.4458	-36.4142	-36.3835	-36.3413	-36.3079	-36.2625	-36.2325	-36.1621	-36.1548	-36.0993	-36.0714	-36.0519	-36.0292	-36.0071	-36.0008	-36.0294
							1543.3	-36.5386	-36.5842	-36.4501	-36.4183	-36.3874	-36.3448	-36.3111	-36.2654	-36.2353	-36.1647	-36.1569	-36.1011	-36.0732	-36.0533	-36.0303	-36.0075	-36.0007	-36.0282
							1543.3	-36.5436	-36.5897	-36.4544	-36.4223	-36.3912	-36.3483	-36.3144	-36.2684	-36.238	-36.1674	-36.1591	-36.1029	-36.075	-36.0547	-36.0313	-36.008	-36.0005	-36.0269
							1543.31	-36.5486	-36.5953	-36.4588	-36.4264	-36.3951	-36.3519	-36.3177	-36.2714	-36.2407	-36.1701	-36.1614	-36.1048	-36.0768	-36.0562	-36.0324	-36.0085	-36.0004	-36.0257
							1543.32	-36.5537	-36.6008	-36.4632	-36.4305	-36.399	-36.3555	-36.321	-36.2744	-36.2435	-36.1728	-36.1636	-36.1067	-36.0787	-36.0576	-36.0335	-36.009	-36.0003	-36.0245
							1543.33	-36.5588	-36.6065	-36.4676	-36.4347	-36.403	-36.3591	-36.3243	-36.2774	-36.2463	-36.1755	-36.1658	-36.1086	-36.0806	-36.0591	-36.0346	-36.0095	-36.0002	-36.0233
							1543.34	-36.5639	-36.6121	-36.472	-36.4388	-36.4069	-36.3627	-36.3276	-36.2804	-36.2491	-36.1782	-36.1681	-36.1105	-36.0825	-36.0606	-36.0357	-36.01	-36.0001	-36.0222
							1543.34	-36.5691	-36.6177	-36.4765	-36.443	-36.4109	-36.3664	-36.331	-36.2835	-36.2519	-36.181	-36.1704	-36.1124	-36.0844	-36.0621	-36.0368	-36.0105	-36.0001	-36.0211
							1543.35	-36.5742	-36.6234	-36.481	-36.4472	-36.4149	-36.37	-36.3344	-36.2866	-36.2547	-36.1838	-36.1727	-36.1144	-36.0864	-36.0636	-36.038	-36.0111	-36	-36.02
							1543.36	-36.5794	-36.6291	-36.4855	-36.4515	-36.4189	-36.3737	-36.3378	-36.2897	-36.2576	-36.1866	-36.175	-36.1163	-36.0883	-36.0651	-36.0392	-36.0116	-36	-36.0189
							1543.37	-36.5846	-36.6349	-36.49	-36.4557	-36.423	-36.3774	-36.3412	-36.2928	-36.2604	-36.1894	-36.1773	-36.1183	-36.0903	-36.0667	-36.0403	-36.0122	-36	-36.0179
							1543.38	-36.5899	-36.6407	-36.4945	-36.46	-36.427	-36.3812	-36.3447	-36.2959	-36.2633	-36.1923	-36.1796	-36.1203	-36.0923	-36.0683	-36.0416	-36.0128	-36	-36.0169
							1543.38	-36.5952	-36.6465	-36.4991	-36.4643	-36.4311	-36.3849	-36.3481	-36.2991	-36.2662	-36.1952	-36.182	-36.1224	-36.0944	-36.0699	-36.0428	-36.0134	-36	-36.0159
							1543.39	-36.6004	-36.6523	-36.5037	-36.4686	-36.4352	-36.3887	-36.3516	-36.3023	-36.2692	-36.1981	-36.1844	-36.1244	-36.0965	-36.0715	-36.044	-36.014	-36.0001	-36.015
							1543.4	-36.6058	-36.6582	-36.5083	-36.4729	-36.4393	-36.3925	-36.3551	-36.3054	-36.2721	-36.201	-36.1868	-36.1265	-36.0985	-36.0731	-36.0453	-36.0147	-36.0002	-36.0141
							1543.41	-36.6111	-36.6641	-36.5129	-36.4773	-36.4435	-36.3963	-36.3587	-36.3087	-36.275	-36.204	-36.1892	-36.1285	-36.1007	-36.0747	-36.0466	-36.0153	-36.0002	-36.0132
							1543.42	-36.6165	-36.67	-36.5176	-36.4816	-36.4476	-36.4002	-36.3622	-36.3119	-36.278	-36.207	-36.1916	-36.1306	-36.1028	-36.0764	-36.0479	-36.016	-36.0003	-36.0123
							1543.42	-36.6219	-36.6759	-36.5222	-36.486	-36.4518	-36.404	-36.3658	-36.3151	-36.281	-36.21	-36.1941	-36.1328	-36.105	-36.0781	-36.0492	-36.0167	-36.0004	-36.0115
							1543.43	-36.6273	-36.6819	-36.5269	-36.4905	-36.456	-36.4079	-36.3694	-36.3184	-36.284	-36.213	-36.1966	-36.1349	-36.1071	-36.0798	-36.0506	-36.0173	-36.0006	-36.0107
							1543.44	-36.6328	-36.6879	-36.5316	-36.4949	-36.4602	-36.4118	-36.373	-36.3217	-36.287	-36.216	-36.1991	-36.1371	-36.1093	-36.0815	-36.0519	-36.018	-36.0007	-36.0099
							1543.45	-36.6382	-36.694	-36.5364	-36.4994	-36.4645	-36.4158	-36.3767	-36.325	-36.2901	-36.2191	-36.2016	-36.1392	-36.1116	-36.0833	-36.0533	-36.0188	-36.0009	-36.0092
							1543.46	-36.6437	-36.7	-36.5411	-36.5039	-36.4688	-36.4197	-36.3803	-36.3283	-36.2932	-36.2222	-36.2041	-36.1414	-36.1138	-36.085	-36.0547	-36.0195	-36.0011	-36.0085
							1543.46	-36.6493	-36.7061	-36.5459	-36.5084	-36.4731	-36.4237	-36.384	-36.3317	-36.2962	-36.2253	-36.2066	-36.1436	-36.1161	-36.0868	-36.0561	-36.0203	-36.0013	-36.0078
							1543.47	-36.6548	-36.7123	-36.5507	-36.5129	-36.4774	-36.4277	-36.3877	-36.3351	-36.2993	-36.2285	-36.2092	-36.1459	-36.1184	-36.0886	-36.0575	-36.021	-36.0015	-36.0071
							1543.48	-36.6604	-36.7184	-36.5555	-36.5175	-36.4817	-36.4317	-36.3914	-36.3384	-36.3024	-36.2316	-36.2118	-36.1481	-36.1207	-36.0904	-36.059	-36.0218	-36.0018	-36.0065
							1543.49	-36.666	-36.7246	-36.5604	-36.5221	-36.4861	-36.4358	-36.3952	-36.3418	-36.3056	-36.2348	-36.2143	-36.1504	-36.1231	-36.0922	-36.0605	-36.0226	-36.002	-36.0059
							1543.5	-36.6717	-36.7308	-36.5653	-36.5267	-36.4904	-36.4399	-36.399	-36.3453	-36.3087	-36.238	-36.217	-36.1526	-36.1255	-36.0941	-36.062	-36.0234	-36.0023	-36.0053
							1543.5	-36.6773	-36.7371	-36.5702	-36.5313	-36.4948	-36.4439	-36.4028	-36.3487	-36.3119	-36.2413	-36.2196	-36.1549	-36.1279	-36.096	-36.0635	-36.0242	-36.0026	-36.0048
							1543.51	-36.683	-36.7434	-36.5751	-36.5359	-36.4993	-36.4481	-36.4066	-36.3522	-36.3151	-36.2445	-36.2222	-36.1573	-36.1303	-36.0978	-36.065	-36.025	-36.0029	-36.0043
							1543.52	-36.6887	-36.7497	-36.58	-36.5406	-36.5037	-36.4522	-36.4104	-36.3557	-36.3183	-36.2478	-36.2249	-36.1596	-36.1327	-36.0998	-36.0665	-36.0259	-36.0032	-36.0038
							1543.53	-36.6945	-36.7561	-36.585	-36.5453	-36.5082	-36.4564	-36.4143	-36.3592	-36.3215	-36.2511	-36.2276	-36.162	-36.1352	-36.1017	-36.0681	-36.0268	-36.0036	-36.0033
							1543.54	-36.7002	-36.7624	-36.59	-36.55	-36.5127	-36.4605	-36.4182	-36.3627	-36.3248	-36.2544	-36.2303	-36.1643	-36.1377	-36.1036	-36.0697	-36.0276	-36.0039	-36.0029
							1543.54	-36.706	-36.7688	-36.595	-36.5548	-36.5172	-36.4648	-36.4221	-36.3663	-36.328	-36.2578	-36.233	-36.1667	-36.1402	-36.1056	-36.0713	-36.0285	-36.0043	-36.0025
							1543.55	-36.7119	-36.7753	-36.6	-36.5595	-36.5217	-36.469	-36.426	-36.3698	-36.3313	-36.2612	-36.2357	-36.1691	-36.1427	-36.1076	-36.0729	-36.0294	-36.0047	-36.0021
							1543.56	-36.7177	-36.7818	-36.6051	-36.5643	-36.5263	-36.4732	-36.4299	-36.3734	-36.3346	-36.2646	-36.2385	-36.1716	-36.1453	-36.1096	-36.0746	-36.0304	-36.0051	-36.0018
							1543.57	-36.7236	-36.7883	-36.6102	-36.5691	-36.5308	-36.4775	-36.4339	-36.377	-36.3379	-36.268	-36.2413	-36.174	-36.1479	-36.1116	-36.0762	-36.0313	-36.0056	-36.0015
							1543.58	-36.7295	-36.7948	-36.6153	-36.5739	-36.5354	-36.4818	-36.4379	-36.3807	-36.3413	-36.2715	-36.244	-36.1765	-36.1505	-36.1136	-36.0779	-36.0323	-36.006	-36.0012
							1543.58	-36.7355	-36.8014	-36.6204	-36.5788	-36.5401	-36.4861	-36.4419	-36.3843	-36.3446	-36.2749	-36.2468	-36.179	-36.1531	-36.1157	-36.0796	-36.0332	-36.0065	-36.001
							1543.59	-36.7415	-36.808	-36.6255	-36.5837	-36.5447	-36.4905	-36.446	-36.388	-36.348	-36.2784	-36.2497	-36.1815	-36.1558	-36.1177	-36.0813	-36.0342	-36.007	-36.0007
							1543.6	-36.7475	-36.8146	-36.6307	-36.5886	-36.5494	-36.4949	-36.45	-36.3917	-36.3514	-36.282	-36.2525	-36.184	-36.1585	-36.1198	-36.0831	-36.0352	-36.0075	-36.0005
							1543.61	-36.7535	-36.8213	-36.6359	-36.5935	-36.5541	-36.4993	-36.4541	-36.3954	-36.3548	-36.2855	-36.2554	-36.1865	-36.1612	-36.1219	-36.0848	-36.0362	-36.008	-36.0004
							1543.62	-36.7595	-36.828	-36.6411	-36.5984	-36.5588	-36.5037	-36.4582	-36.3991	-36.3582	-36.2891	-36.2583	-36.1891	-36.1639	-36.1241	-36.0866	-36.0373	-36.0086	-36.0002
							1543.62	-36.7656	-36.8347	-36.6464	-36.6034	-36.5635	-36.5081	-36.4623	-36.4029	-36.3617	-36.2927	-36.2612	-36.1917	-36.1667	-36.1262	-36.0884	-36.0383	-36.0092	-36.0001
							1543.63	-36.7717	-36.8415	-36.6517	-36.6084	-36.5683	-36.5126	-36.4665	-36.4067	-36.3652	-36.2963	-36.2641	-36.1943	-36.1695	-36.1284	-36.0902	-36.0394	-36.0097	-36.0001
							1543.64	-36.7779	-36.8483	-36.657	-36.6134	-36.5731	-36.5171	-36.4707	-36.4104	-36.3687	-36.2999	-36.267	-36.1969	-36.1723	-36.1306	-36.092	-36.0404	-36.0103	-36
							1543.65	-36.7841	-36.8551	-36.6623	-36.6185	-36.5779	-36.5216	-36.4748	-36.4143	-36.3722	-36.3036	-36.27	-36.1995	-36.1751	-36.1328	-36.0939	-36.0415	-36.011	-36
							1543.66	-36.7903	-36.862	-36.6676	-36.6235	-36.5827	-36.5261	-36.4791	-36.4181	-36.3757	-36.3073	-36.2729	-36.2022	-36.1779	-36.135	-36.0958	-36.0426	-36.0116	-36
							1543.66	-36.7965	-36.8689	-36.673	-36.6286	-36.5875	-36.5307	-36.4833	-36.422	-36.3793	-36.311	-36.2759	-36.2048	-36.1808	-36.1373	-36.0977	-36.0437	-36.0123	-36.0001
							1543.67	-36.8028	-36.8758	-36.6784	-36.6337	-36.5924	-36.5353	-36.4876	-36.4258	-36.3828	-36.3148	-36.279	-36.2075	-36.1837	-36.1395	-36.0996	-36.0449	-36.0129	-36.0001
							1543.68	-36.8091	-36.8828	-36.6838	-36.6389	-36.5973	-36.5399	-36.4918	-36.4297	-36.3864	-36.3186	-36.282	-36.2102	-36.1866	-36.1418	-36.1015	-36.046	-36.0136	-36.0002
							1543.69	-36.8154	-36.8898	-36.6893	-36.644	-36.6022	-36.5445	-36.4961	-36.4337	-36.39	-36.3224	-36.285	-36.213	-36.1896	-36.1441	-36.1035	-36.0472	-36.0144	-36.0004
							1543.7	-36.8217	-36.8968	-36.6948	-36.6492	-36.6072	-36.5492	-36.5005	-36.4376	-36.3937	-36.3262	-36.2881	-36.2157	-36.1926	-36.1464	-36.1054	-36.0484	-36.0151	-36.0005
							1543.7	-36.8281	-36.9039	-36.7003	-36.6544	-36.6121	-36.5538	-36.5048	-36.4416	-36.3973	-36.33	-36.2912	-36.2185	-36.1956	-36.1488	-36.1074	-36.0496	-36.0158	-36.0007
							1543.71	-36.8345	-36.911	-36.7058	-36.6597	-36.6171	-36.5585	-36.5092	-36.4456	-36.401	-36.3339	-36.2943	-36.2213	-36.1986	-36.1511	-36.1094	-36.0508	-36.0166	-36.0009
							1543.72	-36.841	-36.9181	-36.7113	-36.665	-36.6221	-36.5633	-36.5136	-36.4496	-36.4047	-36.3378	-36.2974	-36.2241	-36.2016	-36.1535	-36.1115	-36.052	-36.0174	-36.0012
							1543.73	-36.8475	-36.9253	-36.7169	-36.6702	-36.6272	-36.568	-36.518	-36.4536	-36.4084	-36.3417	-36.3006	-36.2269	-36.2047	-36.1559	-36.1135	-36.0532	-36.0182	-36.0015
							1543.74	-36.854	-36.9325	-36.7225	-36.6756	-36.6322	-36.5728	-36.5224	-36.4577	-36.4121	-36.3457	-36.3037	-36.2297	-36.2078	-36.1583	-36.1156	-36.0545	-36.019	-36.0018
							1543.74	-36.8605	-36.9397	-36.7282	-36.6809	-36.6373	-36.5776	-36.5269	-36.4617	-36.4159	-36.3497	-36.3069	-36.2326	-36.2109	-36.1607	-36.1177	-36.0558	-36.0199	-36.0021
							1543.75	-36.8671	-36.947	-36.7338	-36.6863	-36.6424	-36.5824	-36.5314	-36.4658	-36.4196	-36.3537	-36.3101	-36.2354	-36.2141	-36.1632	-36.1198	-36.0571	-36.0207	-36.0025
							1543.76	-36.8737	-36.9543	-36.7395	-36.6916	-36.6476	-36.5872	-36.5359	-36.4699	-36.4234	-36.3577	-36.3133	-36.2383	-36.2172	-36.1657	-36.1219	-36.0584	-36.0216	-36.0029
							1543.77	-36.8803	-36.9616	-36.7452	-36.6971	-36.6527	-36.5921	-36.5404	-36.4741	-36.4272	-36.3617	-36.3166	-36.2412	-36.2204	-36.1682	-36.124	-36.0597	-36.0225	-36.0033
							1543.78	-36.8869	-36.969	-36.751	-36.7025	-36.6579	-36.597	-36.5449	-36.4782	-36.4311	-36.3658	-36.3198	-36.2442	-36.2236	-36.1707	-36.1262	-36.061	-36.0234	-36.0037
							1543.78	-36.8936	-36.9764	-36.7568	-36.708	-36.6631	-36.6019	-36.5495	-36.4824	-36.4349	-36.3699	-36.3231	-36.2471	-36.2269	-36.1732	-36.1284	-36.0624	-36.0244	-36.0042
							1543.79	-36.9004	-36.9839	-36.7626	-36.7135	-36.6684	-36.6069	-36.5541	-36.4866	-36.4388	-36.3741	-36.3264	-36.2501	-36.2302	-36.1758	-36.1306	-36.0638	-36.0253	-36.0047
							1543.8	-36.9071	-36.9914	-36.7684	-36.719	-36.6736	-36.6118	-36.5587	-36.4908	-36.4427	-36.3782	-36.3297	-36.2531	-36.2335	-36.1783	-36.1328	-36.0651	-36.0263	-36.0053
							1543.81	-36.9139	-36.9989	-36.7742	-36.7245	-36.6789	-36.6168	-36.5634	-36.4951	-36.4466	-36.3824	-36.3331	-36.2561	-36.2368	-36.1809	-36.1351	-36.0665	-36.0273	-36.0058
							1543.82	-36.9207	-37.0064	-36.7801	-36.7301	-36.6842	-36.6218	-36.568	-36.4993	-36.4506	-36.3866	-36.3364	-36.2591	-36.2401	-36.1835	-36.1373	-36.068	-36.0283	-36.0065
							1543.82	-36.9276	-37.014	-36.786	-36.7357	-36.6896	-36.6269	-36.5727	-36.5036	-36.4545	-36.3908	-36.3398	-36.2621	-36.2435	-36.1862	-36.1396	-36.0694	-36.0293	-36.0071
							1543.83	-36.9344	-37.0217	-36.792	-36.7413	-36.695	-36.6319	-36.5774	-36.5079	-36.4585	-36.3951	-36.3432	-36.2652	-36.2469	-36.1888	-36.1419	-36.0708	-36.0304	-36.0077
							1543.84	-36.9413	-37.0293	-36.798	-36.747	-36.7003	-36.637	-36.5821	-36.5123	-36.4625	-36.3994	-36.3466	-36.2683	-36.2503	-36.1915	-36.1442	-36.0723	-36.0315	-36.0084
							1543.85	-36.9483	-37.037	-36.804	-36.7527	-36.7058	-36.6421	-36.5869	-36.5166	-36.4665	-36.4037	-36.35	-36.2714	-36.2538	-36.1942	-36.1466	-36.0738	-36.0325	-36.0091
							1543.86	-36.9553	-37.0447	-36.81	-36.7584	-36.7112	-36.6473	-36.5916	-36.521	-36.4705	-36.4081	-36.3535	-36.2745	-36.2572	-36.1969	-36.149	-36.0753	-36.0337	-36.0099
							1543.86	-36.9623	-37.0525	-36.816	-36.7641	-36.7167	-36.6524	-36.5964	-36.5254	-36.4746	-36.4124	-36.357	-36.2776	-36.2607	-36.1996	-36.1513	-36.0768	-36.0348	-36.0107
							1543.87	-36.9693	-37.0603	-36.8221	-36.7699	-36.7222	-36.6576	-36.6012	-36.5298	-36.4787	-36.4168	-36.3605	-36.2808	-36.2642	-36.2024	-36.1537	-36.0783	-36.0359	-36.0115
							1543.88	-36.9764	-37.0682	-36.8283	-36.7757	-36.7277	-36.6628	-36.6061	-36.5342	-36.4828	-36.4213	-36.364	-36.284	-36.2678	-36.2051	-36.1562	-36.0799	-36.0371	-36.0123
							1543.89	-36.9835	-37.076	-36.8344	-36.7815	-36.7333	-36.6681	-36.6109	-36.5387	-36.4869	-36.4257	-36.3675	-36.2872	-36.2714	-36.2079	-36.1586	-36.0814	-36.0383	-36.0132
							1543.9	-36.9906	-37.0839	-36.8406	-36.7873	-36.7388	-36.6733	-36.6158	-36.5432	-36.4911	-36.4302	-36.3711	-36.2904	-36.275	-36.2107	-36.1611	-36.083	-36.0395	-36.014
							1543.9	-36.9978	-37.0919	-36.8468	-36.7932	-36.7445	-36.6786	-36.6207	-36.5477	-36.4952	-36.4347	-36.3747	-36.2936	-36.2786	-36.2136	-36.1636	-36.0846	-36.0407	-36.015
							1543.91	-37.005	-37.0999	-36.853	-36.7991	-36.7501	-36.6839	-36.6256	-36.5522	-36.4994	-36.4392	-36.3783	-36.2968	-36.2822	-36.2164	-36.1661	-36.0862	-36.0419	-36.0159
							1543.92	-37.0122	-37.1079	-36.8593	-36.805	-36.7558	-36.6893	-36.6306	-36.5568	-36.5036	-36.4438	-36.3819	-36.3001	-36.2859	-36.2193	-36.1686	-36.0878	-36.0432	-36.0169
							1543.93	-37.0195	-37.116	-36.8656	-36.811	-36.7614	-36.6946	-36.6355	-36.5613	-36.5079	-36.4484	-36.3855	-36.3034	-36.2896	-36.2222	-36.1711	-36.0895	-36.0445	-36.0179
							1543.94	-37.0268	-37.1241	-36.8719	-36.817	-36.7672	-36.7	-36.6405	-36.5659	-36.5121	-36.453	-36.3892	-36.3067	-36.2934	-36.2251	-36.1737	-36.0912	-36.0458	-36.0189
							1543.94	-37.0341	-37.1322	-36.8783	-36.823	-36.7729	-36.7054	-36.6455	-36.5705	-36.5164	-36.4577	-36.3929	-36.31	-36.2971	-36.228	-36.1763	-36.0928	-36.0471	-36.02
							1543.95	-37.0415	-37.1404	-36.8847	-36.8291	-36.7787	-36.7109	-36.6506	-36.5752	-36.5207	-36.4623	-36.3966	-36.3134	-36.3009	-36.231	-36.1789	-36.0945	-36.0484	-36.0211
							1543.96	-37.0488	-37.1486	-36.8911	-36.8351	-36.7845	-36.7163	-36.6556	-36.5798	-36.525	-36.4671	-36.4003	-36.3167	-36.3047	-36.2339	-36.1815	-36.0962	-36.0498	-36.0222
							1543.97	-37.0563	-37.1568	-36.8976	-36.8412	-36.7903	-36.7218	-36.6607	-36.5845	-36.5293	-36.4718	-36.404	-36.3201	-36.3085	-36.2369	-36.1841	-36.098	-36.0511	-36.0233
							1543.98	-37.0637	-37.1651	-36.9041	-36.8474	-36.7962	-36.7273	-36.6658	-36.5892	-36.5337	-36.4765	-36.4078	-36.3235	-36.3124	-36.24	-36.1868	-36.0997	-36.0525	-36.0245
							1543.98	-37.0712	-37.1734	-36.9106	-36.8535	-36.8021	-36.7329	-36.671	-36.5939	-36.5381	-36.4813	-36.4116	-36.327	-36.3163	-36.243	-36.1895	-36.1015	-36.0539	-36.0257
							1543.99	-37.0788	-37.1818	-36.9171	-36.8597	-36.808	-36.7385	-36.6761	-36.5987	-36.5425	-36.4862	-36.4154	-36.3304	-36.3202	-36.246	-36.1922	-36.1033	-36.0554	-36.0269
							1544	-37.0863	-37.1902	-36.9237	-36.866	-36.8139	-36.7441	-36.6813	-36.6035	-36.5469	-36.491	-36.4192	-36.3339	-36.3242	-36.2491	-36.1949	-36.105	-36.0568	-36.0282
							1544.01	-37.0939	-37.1986	-36.9303	-36.8722	-36.8199	-36.7497	-36.6865	-36.6083	-36.5514	-36.4959	-36.423	-36.3373	-36.3281	-36.2522	-36.1976	-36.1069	-36.0583	-36.0295
							1544.02	-37.1015	-37.2071	-36.937	-36.8785	-36.8259	-36.7553	-36.6917	-36.6131	-36.5558	-36.5008	-36.4269	-36.3408	-36.3321	-36.2553	-36.2004	-36.1087	-36.0598	-36.0308
							1544.02	-37.1092	-37.2156	-36.9436	-36.8848	-36.832	-36.761	-36.697	-36.6179	-36.5603	-36.5057	-36.4308	-36.3444	-36.3362	-36.2585	-36.2032	-36.1105	-36.0613	-36.0321
							1544.03	-37.1169	-37.2242	-36.9503	-36.8911	-36.838	-36.7667	-36.7022	-36.6228	-36.5648	-36.5107	-36.4347	-36.3479	-36.3402	-36.2616	-36.206	-36.1124	-36.0628	-36.0335
							1544.04	-37.1246	-37.2327	-36.9571	-36.8975	-36.8441	-36.7724	-36.7075	-36.6277	-36.5694	-36.5157	-36.4386	-36.3515	-36.3443	-36.2648	-36.2088	-36.1143	-36.0643	-36.0349
							1544.05	-37.1324	-37.2414	-36.9639	-36.9039	-36.8503	-36.7782	-36.7129	-36.6326	-36.5739	-36.5207	-36.4426	-36.355	-36.3484	-36.268	-36.2116	-36.1162	-36.0659	-36.0363
							1544.06	-37.1402	-37.25	-36.9707	-36.9104	-36.8564	-36.784	-36.7182	-36.6375	-36.5785	-36.5257	-36.4466	-36.3586	-36.3525	-36.2712	-36.2145	-36.1181	-36.0675	-36.0377
							1544.06	-37.148	-37.2587	-36.9775	-36.9168	-36.8626	-36.7898	-36.7236	-36.6424	-36.5831	-36.5308	-36.4505	-36.3623	-36.3567	-36.2745	-36.2174	-36.12	-36.0691	-36.0392
							1544.07	-37.1559	-37.2675	-36.9844	-36.9233	-36.8688	-36.7956	-36.729	-36.6474	-36.5877	-36.5359	-36.4546	-36.3659	-36.3609	-36.2778	-36.2202	-36.122	-36.0707	-36.0407
							1544.08	-37.1638	-37.2763	-36.9913	-36.9299	-36.8751	-36.8015	-36.7344	-36.6524	-36.5924	-36.5411	-36.4586	-36.3696	-36.3651	-36.281	-36.2232	-36.1239	-36.0723	-36.0422
							1544.09	-37.1717	-37.2851	-36.9982	-36.9364	-36.8813	-36.8074	-36.7398	-36.6574	-36.597	-36.5462	-36.4626	-36.3733	-36.3693	-36.2843	-36.2261	-36.1259	-36.074	-36.0438
							1544.1	-37.1797	-37.294	-37.0052	-36.943	-36.8877	-36.8133	-36.7453	-36.6625	-36.6017	-36.5514	-36.4667	-36.377	-36.3736	-36.2877	-36.2291	-36.1279	-36.0757	-36.0454
							1544.1	-37.1877	-37.3029	-37.0122	-36.9496	-36.894	-36.8192	-36.7508	-36.6676	-36.6065	-36.5567	-36.4708	-36.3807	-36.3779	-36.291	-36.232	-36.1299	-36.0774	-36.047
							1544.11	-37.1957	-37.3118	-37.0192	-36.9563	-36.9004	-36.8252	-36.7563	-36.6727	-36.6112	-36.5619	-36.4749	-36.3844	-36.3823	-36.2944	-36.235	-36.1319	-36.0791	-36.0486
							1544.12	-37.2038	-37.3208	-37.0263	-36.963	-36.9068	-36.8312	-36.7619	-36.6778	-36.6159	-36.5672	-36.4791	-36.3882	-36.3866	-36.2978	-36.2381	-36.134	-36.0808	-36.0503
							1544.13	-37.2119	-37.3298	-37.0334	-36.9697	-36.9132	-36.8372	-36.7674	-36.6829	-36.6207	-36.5725	-36.4832	-36.392	-36.391	-36.3012	-36.2411	-36.136	-36.0826	-36.052
							1544.14	-37.2201	-37.3389	-37.0405	-36.9764	-36.9197	-36.8433	-36.773	-36.6881	-36.6255	-36.5779	-36.4874	-36.3958	-36.3954	-36.3046	-36.2442	-36.1381	-36.0844	-36.0537
							1544.14	-37.2283	-37.348	-37.0477	-36.9832	-36.9262	-36.8494	-36.7787	-36.6933	-36.6304	-36.5833	-36.4916	-36.3996	-36.3999	-36.3081	-36.2472	-36.1402	-36.0861	-36.0554
							1544.15	-37.2365	-37.3571	-37.0549	-36.99	-36.9327	-36.8555	-36.7843	-36.6985	-36.6352	-36.5887	-36.4958	-36.4035	-36.4043	-36.3116	-36.2503	-36.1423	-36.088	-36.0572
							1544.16	-37.2447	-37.3663	-37.0621	-36.9969	-36.9392	-36.8616	-36.79	-36.7037	-36.6401	-36.5941	-36.5001	-36.4073	-36.4088	-36.3151	-36.2534	-36.1445	-36.0898	-36.059
							1544.17	-37.253	-37.3756	-37.0694	-37.0037	-36.9458	-36.8678	-36.7957	-36.709	-36.645	-36.5996	-36.5043	-36.4112	-36.4134	-36.3186	-36.2566	-36.1466	-36.0916	-36.0608
							1544.18	-37.2614	-37.3848	-37.0767	-37.0106	-36.9524	-36.874	-36.8014	-36.7143	-36.6499	-36.6051	-36.5086	-36.4151	-36.4179	-36.3222	-36.2597	-36.1488	-36.0935	-36.0627
							1544.18	-37.2698	-37.3941	-37.084	-37.0176	-36.9591	-36.8802	-36.8072	-36.7196	-36.6548	-36.6106	-36.5129	-36.4191	-36.4225	-36.3257	-36.2629	-36.151	-36.0954	-36.0645
							1544.19	-37.2782	-37.4035	-37.0914	-37.0246	-36.9658	-36.8865	-36.813	-36.725	-36.6598	-36.6162	-36.5173	-36.423	-36.4271	-36.3293	-36.2661	-36.1532	-36.0973	-36.0665
							1544.2	-37.2866	-37.4129	-37.0988	-37.0316	-36.9725	-36.8928	-36.8188	-36.7303	-36.6648	-36.6218	-36.5216	-36.427	-36.4318	-36.3329	-36.2693	-36.1554	-36.0992	-36.0684
							1544.21	-37.2951	-37.4223	-37.1063	-37.0386	-36.9792	-36.8991	-36.8246	-36.7357	-36.6698	-36.6274	-36.526	-36.431	-36.4364	-36.3366	-36.2726	-36.1576	-36.1012	-36.0703
							1544.22	-37.3036	-37.4318	-37.1137	-37.0457	-36.986	-36.9054	-36.8305	-36.7411	-36.6749	-36.633	-36.5304	-36.435	-36.4411	-36.3402	-36.2758	-36.1599	-36.1031	-36.0723
							1544.22	-37.3122	-37.4413	-37.1212	-37.0528	-36.9928	-36.9118	-36.8364	-36.7466	-36.6799	-36.6387	-36.5348	-36.439	-36.4459	-36.3439	-36.2791	-36.1621	-36.1051	-36.0743
							1544.23	-37.3208	-37.4509	-37.1288	-37.0599	-36.9997	-36.9182	-36.8423	-36.7521	-36.685	-36.6444	-36.5392	-36.4431	-36.4506	-36.3476	-36.2824	-36.1644	-36.1071	-36.0763
							1544.24	-37.3295	-37.4605	-37.1364	-37.0671	-37.0065	-36.9246	-36.8483	-36.7575	-36.6901	-36.6502	-36.5437	-36.4472	-36.4554	-36.3513	-36.2857	-36.1667	-36.1092	-36.0784
							1544.25	-37.3381	-37.4702	-37.144	-37.0743	-37.0134	-36.9311	-36.8543	-36.7631	-36.6953	-36.656	-36.5482	-36.4513	-36.4602	-36.3551	-36.2891	-36.169	-36.1112	-36.0805
							1544.26	-37.3469	-37.4799	-37.1516	-37.0815	-37.0204	-36.9376	-36.8603	-36.7686	-36.7004	-36.6618	-36.5527	-36.4554	-36.4651	-36.3588	-36.2924	-36.1713	-36.1133	-36.0826
							1544.26	-37.3556	-37.4896	-37.1593	-37.0887	-37.0274	-36.9441	-36.8663	-36.7742	-36.7056	-36.6676	-36.5572	-36.4596	-36.47	-36.3626	-36.2958	-36.1737	-36.1153	-36.0847
							1544.27	-37.3644	-37.4994	-37.167	-37.096	-37.0344	-36.9506	-36.8724	-36.7798	-36.7108	-36.6735	-36.5617	-36.4637	-36.4749	-36.3664	-36.2992	-36.1761	-36.1174	-36.0869
							1544.28	-37.3733	-37.5092	-37.1748	-37.1034	-37.0414	-36.9572	-36.8785	-36.7854	-36.7161	-36.6794	-36.5663	-36.4679	-36.4798	-36.3703	-36.3027	-36.1784	-36.1196	-36.0891
							1544.29	-37.3822	-37.5191	-37.1826	-37.1107	-37.0484	-36.9638	-36.8846	-36.7911	-36.7213	-36.6853	-36.5709	-36.4721	-36.4848	-36.3741	-36.3061	-36.1808	-36.1217	-36.0913
							1544.3	-37.3911	-37.529	-37.1904	-37.1181	-37.0555	-36.9705	-36.8908	-36.7968	-36.7266	-36.6913	-36.5755	-36.4764	-36.4898	-36.378	-36.3096	-36.1832	-36.1239	-36.0935
							1544.3	-37.4001	-37.539	-37.1982	-37.1256	-37.0627	-36.9771	-36.897	-36.8025	-36.7319	-36.6973	-36.5801	-36.4806	-36.4948	-36.3819	-36.313	-36.1857	-36.126	-36.0958
							1544.31	-37.4091	-37.549	-37.2061	-37.133	-37.0698	-36.9838	-36.9032	-36.8082	-36.7372	-36.7033	-36.5848	-36.4849	-36.4999	-36.3858	-36.3166	-36.1881	-36.1282	-36.0981
							1544.32	-37.4182	-37.559	-37.2141	-37.1405	-37.077	-36.9906	-36.9094	-36.814	-36.7426	-36.7093	-36.5895	-36.4892	-36.5049	-36.3898	-36.3201	-36.1906	-36.1305	-36.1004
							1544.33	-37.4273	-37.5691	-37.222	-37.148	-37.0842	-36.9973	-36.9157	-36.8198	-36.748	-36.7154	-36.5942	-36.4935	-36.5101	-36.3938	-36.3236	-36.1931	-36.1327	-36.1028
							1544.34	-37.4365	-37.5793	-37.23	-37.1556	-37.0915	-37.0041	-36.922	-36.8256	-36.7534	-36.7215	-36.5989	-36.4979	-36.5152	-36.3978	-36.3272	-36.1956	-36.1349	-36.1051
							1544.34	-37.4457	-37.5895	-37.2381	-37.1632	-37.0988	-37.011	-36.9283	-36.8315	-36.7589	-36.7277	-36.6036	-36.5022	-36.5204	-36.4018	-36.3308	-36.1981	-36.1372	-36.1075
							1544.35	-37.4549	-37.5997	-37.2462	-37.1708	-37.1061	-37.0178	-36.9347	-36.8373	-36.7643	-36.7339	-36.6084	-36.5066	-36.5256	-36.4058	-36.3344	-36.2006	-36.1395	-36.1099
							1544.36	-37.4642	-37.61	-37.2543	-37.1785	-37.1135	-37.0247	-36.9411	-36.8433	-36.7698	-36.7401	-36.6132	-36.511	-36.5308	-36.4099	-36.338	-36.2032	-36.1418	-36.1124
							1544.37	-37.4735	-37.6204	-37.2624	-37.1862	-37.1209	-37.0316	-36.9475	-36.8492	-36.7753	-36.7463	-36.618	-36.5155	-36.5361	-36.414	-36.3417	-36.2057	-36.1442	-36.1149
							1544.38	-37.4829	-37.6307	-37.2706	-37.1939	-37.1283	-37.0386	-36.954	-36.8552	-36.7809	-36.7526	-36.6228	-36.5199	-36.5414	-36.4181	-36.3454	-36.2083	-36.1465	-36.1174
							1544.38	-37.4923	-37.6412	-37.2789	-37.2017	-37.1357	-37.0455	-36.9604	-36.8612	-36.7865	-36.7589	-36.6277	-36.5244	-36.5467	-36.4222	-36.3491	-36.2109	-36.1489	-36.1199
							1544.39	-37.5018	-37.6516	-37.2871	-37.2095	-37.1432	-37.0525	-36.967	-36.8672	-36.7921	-36.7653	-36.6326	-36.5289	-36.5521	-36.4264	-36.3528	-36.2135	-36.1513	-36.1224
							1544.4	-37.5113	-37.6622	-37.2954	-37.2173	-37.1507	-37.0596	-36.9735	-36.8732	-36.7977	-36.7716	-36.6375	-36.5334	-36.5574	-36.4306	-36.3565	-36.2162	-36.1537	-36.125
							1544.41	-37.5209	-37.6728	-37.3038	-37.2252	-37.1583	-37.0666	-36.9801	-36.8793	-36.8033	-36.778	-36.6424	-36.538	-36.5629	-36.4348	-36.3603	-36.2188	-36.1561	-36.1276
							1544.42	-37.5305	-37.6834	-37.3122	-37.2331	-37.1659	-37.0738	-36.9867	-36.8854	-36.809	-36.7845	-36.6473	-36.5426	-36.5683	-36.439	-36.3641	-36.2215	-36.1586	-36.1302
							1544.42	-37.5401	-37.6941	-37.3206	-37.2411	-37.1735	-37.0809	-36.9933	-36.8916	-36.8147	-36.791	-36.6523	-36.5472	-36.5738	-36.4433	-36.3679	-36.2242	-36.161	-36.1329
							1544.43	-37.5499	-37.7048	-37.329	-37.249	-37.1811	-37.088	-37	-36.8978	-36.8205	-36.7975	-36.6573	-36.5518	-36.5793	-36.4476	-36.3717	-36.2269	-36.1635	-36.1356
							1544.44	-37.5596	-37.7156	-37.3375	-37.257	-37.1888	-37.0952	-37.0067	-36.904	-36.8262	-36.804	-36.6623	-36.5564	-36.5848	-36.4519	-36.3755	-36.2296	-36.166	-36.1383
							1544.45	-37.5694	-37.7264	-37.3461	-37.2651	-37.1965	-37.1025	-37.0134	-36.9102	-36.832	-36.8106	-36.6673	-36.5611	-36.5904	-36.4562	-36.3794	-36.2323	-36.1686	-36.141
							1544.46	-37.5793	-37.7373	-37.3547	-37.2732	-37.2043	-37.1097	-37.0202	-36.9165	-36.8379	-36.8172	-36.6724	-36.5658	-36.596	-36.4605	-36.3833	-36.2351	-36.1711	-36.1438
							1544.46	-37.5892	-37.7482	-37.3633	-37.2813	-37.212	-37.117	-37.027	-36.9228	-36.8437	-36.8238	-36.6775	-36.5705	-36.6016	-36.4649	-36.3872	-36.2378	-36.1737	-36.1466
							1544.47	-37.5991	-37.7592	-37.3719	-37.2895	-37.2199	-37.1244	-37.0338	-36.9291	-36.8496	-36.8304	-36.6826	-36.5752	-36.6073	-36.4693	-36.3912	-36.2406	-36.1763	-36.1494
							1544.48	-37.6091	-37.7702	-37.3806	-37.2977	-37.2277	-37.1317	-37.0407	-36.9355	-36.8555	-36.8371	-36.6877	-36.58	-36.613	-36.4737	-36.3951	-36.2434	-36.1789	-36.1522
							1544.49	-37.6192	-37.7813	-37.3894	-37.3059	-37.2356	-37.1391	-37.0476	-36.9419	-36.8615	-36.8439	-36.6929	-36.5847	-36.6187	-36.4782	-36.3991	-36.2462	-36.1815	-36.1551
							1544.5	-37.6293	-37.7924	-37.3982	-37.3142	-37.2435	-37.1465	-37.0545	-36.9483	-36.8674	-36.8506	-36.6981	-36.5895	-36.6244	-36.4826	-36.4031	-36.2491	-36.1842	-36.158
							1544.5	-37.6395	-37.8036	-37.407	-37.3225	-37.2515	-37.154	-37.0614	-36.9547	-36.8734	-36.8574	-36.7033	-36.5944	-36.6302	-36.4871	-36.4071	-36.2519	-36.1868	-36.1609
							1544.51	-37.6497	-37.8148	-37.4159	-37.3308	-37.2594	-37.1615	-37.0684	-36.9612	-36.8794	-36.8642	-36.7085	-36.5992	-36.636	-36.4917	-36.4112	-36.2548	-36.1895	-36.1638
							1544.52	-37.6599	-37.8261	-37.4248	-37.3392	-37.2675	-37.169	-37.0754	-36.9677	-36.8855	-36.8711	-36.7138	-36.6041	-36.6419	-36.4962	-36.4152	-36.2577	-36.1922	-36.1668
							1544.53	-37.6703	-37.8375	-37.4337	-37.3477	-37.2755	-37.1765	-37.0825	-36.9743	-36.8916	-36.878	-36.719	-36.609	-36.6478	-36.5008	-36.4193	-36.2606	-36.1949	-36.1698
							1544.54	-37.6806	-37.8489	-37.4427	-37.3561	-37.2836	-37.1841	-37.0896	-36.9809	-36.8977	-36.8849	-36.7243	-36.6139	-36.6537	-36.5054	-36.4235	-36.2635	-36.1977	-36.1728
							1544.54	-37.691	-37.8603	-37.4518	-37.3646	-37.2917	-37.1917	-37.0967	-36.9875	-36.9039	-36.8919	-36.7297	-36.6188	-36.6596	-36.51	-36.4276	-36.2664	-36.2004	-36.1759
							1544.55	-37.7015	-37.8718	-37.4609	-37.3732	-37.2999	-37.1994	-37.1038	-36.9941	-36.91	-36.8989	-36.735	-36.6238	-36.6656	-36.5146	-36.4318	-36.2694	-36.2032	-36.179
							1544.56	-37.712	-37.8834	-37.47	-37.3818	-37.3081	-37.2071	-37.111	-37.0008	-36.9162	-36.9059	-36.7404	-36.6288	-36.6716	-36.5193	-36.436	-36.2724	-36.206	-36.1821
							1544.57	-37.7226	-37.895	-37.4792	-37.3904	-37.3163	-37.2148	-37.1182	-37.0075	-36.9225	-36.9129	-36.7458	-36.6338	-36.6776	-36.524	-36.4402	-36.2754	-36.2088	-36.1852
							1544.58	-37.7332	-37.9067	-37.4884	-37.3991	-37.3246	-37.2225	-37.1255	-37.0143	-36.9287	-36.92	-36.7512	-36.6388	-36.6837	-36.5287	-36.4444	-36.2784	-36.2117	-36.1884
							1544.58	-37.7439	-37.9184	-37.4977	-37.4078	-37.3329	-37.2303	-37.1327	-37.021	-36.935	-36.9271	-36.7567	-36.6439	-36.6897	-36.5334	-36.4487	-36.2814	-36.2145	-36.1916
							1544.59	-37.7547	-37.9302	-37.507	-37.4165	-37.3412	-37.2382	-37.1401	-37.0278	-36.9414	-36.9343	-36.7622	-36.649	-36.6959	-36.5382	-36.4529	-36.2845	-36.2174	-36.1948
							1544.6	-37.7654	-37.942	-37.5163	-37.4253	-37.3496	-37.246	-37.1474	-37.0347	-36.9477	-36.9415	-36.7677	-36.6541	-36.702	-36.543	-36.4572	-36.2875	-36.2203	-36.1981
							1544.61	-37.7763	-37.9539	-37.5257	-37.4341	-37.358	-37.2539	-37.1548	-37.0415	-36.9541	-36.9487	-36.7732	-36.6592	-36.7082	-36.5478	-36.4616	-36.2906	-36.2232	-36.2013
							1544.62	-37.7872	-37.9659	-37.5352	-37.443	-37.3665	-37.2618	-37.1622	-37.0484	-36.9605	-36.956	-36.7788	-36.6644	-36.7144	-36.5527	-36.4659	-36.2937	-36.2262	-36.2046
							1544.62	-37.7981	-37.9779	-37.5447	-37.4519	-37.375	-37.2698	-37.1696	-37.0554	-36.967	-36.9632	-36.7843	-36.6696	-36.7207	-36.5575	-36.4703	-36.2968	-36.2291	-36.208
							1544.63	-37.8092	-37.99	-37.5542	-37.4609	-37.3835	-37.2778	-37.1771	-37.0623	-36.9735	-36.9706	-36.79	-36.6748	-36.727	-36.5624	-36.4747	-36.3	-36.2321	-36.2113
							1544.64	-37.8202	-38.0021	-37.5638	-37.4699	-37.3921	-37.2858	-37.1846	-37.0693	-36.98	-36.9779	-36.7956	-36.68	-36.7333	-36.5673	-36.4791	-36.3031	-36.2351	-36.2147
							1544.65	-37.8313	-38.0143	-37.5735	-37.4789	-37.4007	-37.2939	-37.1922	-37.0764	-36.9865	-36.9853	-36.8013	-36.6852	-36.7396	-36.5723	-36.4836	-36.3063	-36.2381	-36.2181
							1544.66	-37.8425	-38.0265	-37.5831	-37.488	-37.4093	-37.302	-37.1997	-37.0834	-36.9931	-36.9927	-36.807	-36.6905	-36.746	-36.5772	-36.488	-36.3095	-36.2412	-36.2216
							1544.66	-37.8537	-38.0388	-37.5929	-37.4972	-37.418	-37.3101	-37.2073	-37.0905	-36.9997	-37.0002	-36.8127	-36.6958	-36.7524	-36.5822	-36.4925	-36.3127	-36.2442	-36.2251
							1544.67	-37.865	-38.0511	-37.6027	-37.5063	-37.4268	-37.3183	-37.215	-37.0977	-37.0064	-37.0077	-36.8184	-36.7012	-36.7588	-36.5873	-36.4971	-36.3159	-36.2473	-36.2286
							1544.68	-37.8764	-38.0636	-37.6125	-37.5156	-37.4355	-37.3265	-37.2227	-37.1048	-37.013	-37.0152	-36.8242	-36.7065	-36.7653	-36.5923	-36.5016	-36.3192	-36.2504	-36.2321
							1544.69	-37.8878	-38.076	-37.6224	-37.5248	-37.4443	-37.3348	-37.2304	-37.112	-37.0197	-37.0228	-36.83	-36.7119	-36.7718	-36.5974	-36.5062	-36.3224	-36.2535	-36.2356
							1544.7	-37.8992	-38.0886	-37.6323	-37.5341	-37.4532	-37.3431	-37.2381	-37.1193	-37.0265	-37.0304	-36.8358	-36.7173	-36.7783	-36.6025	-36.5108	-36.3257	-36.2566	-36.2392
							1544.7	-37.9107	-38.1012	-37.6423	-37.5435	-37.4621	-37.3514	-37.2459	-37.1265	-37.0332	-37.038	-36.8417	-36.7227	-36.7849	-36.6076	-36.5154	-36.329	-36.2598	-36.2429
							1544.71	-37.9223	-38.1138	-37.6523	-37.5529	-37.471	-37.3598	-37.2537	-37.1338	-37.04	-37.0457	-36.8476	-36.7282	-36.7915	-36.6127	-36.52	-36.3324	-36.263	-36.2465
							1544.72	-37.9339	-38.1265	-37.6624	-37.5624	-37.48	-37.3682	-37.2616	-37.1412	-37.0469	-37.0534	-36.8535	-36.7336	-36.7981	-36.6179	-36.5247	-36.3357	-36.2662	-36.2502
							1544.73	-37.9456	-38.1393	-37.6725	-37.5719	-37.489	-37.3766	-37.2695	-37.1485	-37.0537	-37.0611	-36.8594	-36.7391	-36.8048	-36.6231	-36.5294	-36.3391	-36.2694	-36.2539
							1544.74	-37.9573	-38.1521	-37.6827	-37.5814	-37.498	-37.3851	-37.2774	-37.1559	-37.0606	-37.0689	-36.8654	-36.7447	-36.8115	-36.6283	-36.5341	-36.3425	-36.2726	-36.2576
							1544.74	-37.9691	-38.165	-37.6929	-37.591	-37.5071	-37.3936	-37.2854	-37.1634	-37.0676	-37.0767	-36.8714	-36.7502	-36.8182	-36.6336	-36.5389	-36.3459	-36.2759	-36.2614
							1544.75	-37.981	-38.178	-37.7032	-37.6007	-37.5163	-37.4022	-37.2934	-37.1708	-37.0745	-37.0845	-36.8774	-36.7558	-36.825	-36.6389	-36.5437	-36.3493	-36.2791	-36.2652
							1544.76	-37.9929	-38.191	-37.7135	-37.6104	-37.5255	-37.4108	-37.3014	-37.1783	-37.0815	-37.0924	-36.8835	-36.7614	-36.8318	-36.6442	-36.5485	-36.3527	-36.2824	-36.269
							1544.77	-38.0049	-38.2041	-37.7239	-37.6201	-37.5347	-37.4194	-37.3095	-37.1859	-37.0885	-37.1003	-36.8896	-36.767	-36.8386	-36.6495	-36.5533	-36.3562	-36.2857	-36.2729
							1544.78	-38.0169	-38.2172	-37.7343	-37.6299	-37.544	-37.4281	-37.3176	-37.1934	-37.0956	-37.1082	-36.8957	-36.7727	-36.8454	-36.6548	-36.5581	-36.3597	-36.2891	-36.2768
							1544.78	-38.029	-38.2304	-37.7448	-37.6397	-37.5533	-37.4368	-37.3257	-37.201	-37.1027	-37.1162	-36.9018	-36.7783	-36.8523	-36.6602	-36.563	-36.3632	-36.2924	-36.2807
							1544.79	-38.0411	-38.2437	-37.7553	-37.6496	-37.5627	-37.4456	-37.3339	-37.2087	-37.1098	-37.1242	-36.908	-36.784	-36.8593	-36.6656	-36.5679	-36.3667	-36.2958	-36.2846
							1544.8	-38.0533	-38.257	-37.7659	-37.6596	-37.5721	-37.4544	-37.3421	-37.2164	-37.1169	-37.1323	-36.9142	-36.7898	-36.8662	-36.6711	-36.5728	-36.3703	-36.2992	-36.2886
							1544.81	-38.0656	-38.2704	-37.7766	-37.6696	-37.5815	-37.4632	-37.3504	-37.2241	-37.1241	-37.1404	-36.9205	-36.7955	-36.8732	-36.6765	-36.5778	-36.3738	-36.3026	-36.2926
							1544.82	-38.0779	-38.2839	-37.7873	-37.6796	-37.591	-37.4721	-37.3587	-37.2318	-37.1314	-37.1485	-36.9267	-36.8013	-36.8802	-36.682	-36.5828	-36.3774	-36.306	-36.2966
							1544.82	-38.0903	-38.2974	-37.798	-37.6897	-37.6006	-37.481	-37.367	-37.2396	-37.1386	-37.1567	-36.933	-36.8071	-36.8873	-36.6875	-36.5878	-36.381	-36.3095	-36.3007
							1544.83	-38.1027	-38.311	-37.8088	-37.6999	-37.6102	-37.49	-37.3754	-37.2474	-37.1459	-37.1649	-36.9393	-36.813	-36.8944	-36.6931	-36.5928	-36.3846	-36.3129	-36.3048
							1544.84	-38.1152	-38.3247	-37.8197	-37.7101	-37.6198	-37.499	-37.3838	-37.2552	-37.1532	-37.1731	-36.9457	-36.8188	-36.9015	-36.6987	-36.5978	-36.3883	-36.3164	-36.3089
							1544.85	-38.1278	-38.3384	-37.8306	-37.7203	-37.6295	-37.5081	-37.3923	-37.2631	-37.1606	-37.1814	-36.9521	-36.8247	-36.9087	-36.7043	-36.6029	-36.392	-36.3199	-36.3131
							1544.86	-38.1404	-38.3522	-37.8415	-37.7306	-37.6392	-37.5172	-37.4008	-37.271	-37.1679	-37.1897	-36.9585	-36.8306	-36.9159	-36.7099	-36.608	-36.3956	-36.3234	-36.3173
							1544.86	-38.1531	-38.366	-37.8525	-37.741	-37.649	-37.5264	-37.4093	-37.279	-37.1754	-37.198	-36.9649	-36.8366	-36.9231	-36.7155	-36.6132	-36.3994	-36.327	-36.3215
							1544.87	-38.1659	-38.38	-37.8636	-37.7514	-37.6589	-37.5356	-37.4179	-37.287	-37.1828	-37.2064	-36.9714	-36.8426	-36.9304	-36.7212	-36.6183	-36.4031	-36.3306	-36.3258
							1544.88	-38.1787	-38.394	-37.8747	-37.7618	-37.6687	-37.5448	-37.4265	-37.295	-37.1903	-37.2149	-36.9779	-36.8486	-36.9377	-36.7269	-36.6235	-36.4068	-36.3341	-36.3301
							1544.89	-38.1915	-38.408	-37.8859	-37.7723	-37.6787	-37.5541	-37.4352	-37.3031	-37.1978	-37.2233	-36.9845	-36.8546	-36.945	-36.7327	-36.6288	-36.4106	-36.3378	-36.3344
							1544.9	-38.2045	-38.4221	-37.8971	-37.7829	-37.6887	-37.5634	-37.4439	-37.3112	-37.2054	-37.2318	-36.991	-36.8606	-36.9524	-36.7384	-36.634	-36.4144	-36.3414	-36.3387
							1544.9	-38.2175	-38.4363	-37.9084	-37.7935	-37.6987	-37.5728	-37.4526	-37.3193	-37.213	-37.2404	-36.9976	-36.8667	-36.9598	-36.7442	-36.6393	-36.4182	-36.345	-36.3431
							1544.91	-38.2305	-38.4506	-37.9197	-37.8042	-37.7088	-37.5822	-37.4614	-37.3275	-37.2206	-37.2489	-37.0043	-36.8728	-36.9672	-36.75	-36.6446	-36.4221	-36.3487	-36.3475
							1544.92	-38.2436	-38.4649	-37.9311	-37.8149	-37.7189	-37.5917	-37.4702	-37.3357	-37.2282	-37.2576	-37.0109	-36.879	-36.9747	-36.7559	-36.6499	-36.4259	-36.3524	-36.352
							1544.93	-38.2568	-38.4793	-37.9425	-37.8257	-37.7291	-37.6012	-37.4791	-37.3439	-37.2359	-37.2662	-37.0176	-36.8851	-36.9822	-36.7617	-36.6552	-36.4298	-36.3561	-36.3565
							1544.94	-38.2701	-38.4938	-37.954	-37.8365	-37.7393	-37.6108	-37.488	-37.3522	-37.2436	-37.2749	-37.0243	-36.8913	-36.9897	-36.7676	-36.6606	-36.4337	-36.3598	-36.361
							1544.94	-38.2834	-38.5083	-37.9656	-37.8474	-37.7496	-37.6204	-37.497	-37.3605	-37.2514	-37.2836	-37.0311	-36.8976	-36.9973	-36.7736	-36.666	-36.4377	-36.3636	-36.3655
							1544.95	-38.2968	-38.5229	-37.9772	-37.8584	-37.7599	-37.6301	-37.506	-37.3689	-37.2592	-37.2924	-37.0379	-36.9038	-37.0049	-36.7795	-36.6715	-36.4416	-36.3673	-36.3701
							1544.96	-38.3103	-38.5376	-37.9889	-37.8694	-37.7703	-37.6398	-37.515	-37.3773	-37.267	-37.3012	-37.0447	-36.9101	-37.0126	-36.7855	-36.6769	-36.4456	-36.3711	-36.3747
							1544.97	-38.3238	-38.5524	-38.0006	-37.8804	-37.7808	-37.6496	-37.5241	-37.3857	-37.2749	-37.3101	-37.0515	-36.9164	-37.0203	-36.7915	-36.6824	-36.4496	-36.3749	-36.3794
							1544.98	-38.3374	-38.5672	-38.0123	-37.8915	-37.7912	-37.6594	-37.5333	-37.3942	-37.2828	-37.319	-37.0584	-36.9228	-37.028	-36.7976	-36.6879	-36.4536	-36.3788	-36.384
							1544.98	-38.351	-38.5821	-38.0242	-37.9027	-37.8018	-37.6692	-37.5424	-37.4027	-37.2907	-37.3279	-37.0653	-36.9291	-37.0358	-36.8037	-36.6935	-36.4576	-36.3826	-36.3887
							1544.99	-38.3648	-38.5971	-38.0361	-37.9139	-37.8124	-37.6791	-37.5517	-37.4112	-37.2987	-37.3369	-37.0723	-36.9355	-37.0436	-36.8098	-36.6991	-36.4617	-36.3865	-36.3935
							1545	-38.3786	-38.6121	-38.048	-37.9252	-37.823	-37.6891	-37.5609	-37.4198	-37.3067	-37.3459	-37.0792	-36.942	-37.0514	-36.8159	-36.7047	-36.4658	-36.3904	-36.3983
							1545.01	-38.3925	-38.6272	-38.06	-37.9365	-37.8337	-37.6991	-37.5703	-37.4284	-37.3148	-37.355	-37.0863	-36.9484	-37.0593	-36.8221	-36.7103	-36.4699	-36.3943	-36.4031
							1545.02	-38.4064	-38.6424	-38.072	-37.9479	-37.8445	-37.7092	-37.5796	-37.4371	-37.3228	-37.364	-37.0933	-36.9549	-37.0672	-36.8283	-36.7159	-36.474	-36.3982	-36.4079
							1545.02	-38.4204	-38.6577	-38.0842	-37.9594	-37.8553	-37.7193	-37.589	-37.4458	-37.3309	-37.3732	-37.1004	-36.9614	-37.0751	-36.8345	-36.7216	-36.4781	-36.4022	-36.4128
							1545.03	-38.4345	-38.673	-38.0963	-37.9709	-37.8662	-37.7295	-37.5985	-37.4545	-37.3391	-37.3824	-37.1075	-36.968	-37.0831	-36.8407	-36.7274	-36.4823	-36.4062	-36.4177
							1545.04	-38.4487	-38.6884	-38.1085	-37.9824	-37.8771	-37.7397	-37.608	-37.4633	-37.3473	-37.3916	-37.1146	-36.9746	-37.0912	-36.847	-36.7331	-36.4865	-36.4102	-36.4226
							1545.05	-38.4629	-38.7039	-38.1208	-37.9941	-37.888	-37.75	-37.6176	-37.4722	-37.3555	-37.4008	-37.1218	-36.9812	-37.0992	-36.8533	-36.7389	-36.4907	-36.4142	-36.4276
							1545.06	-38.4772	-38.7195	-38.1332	-38.0057	-37.8991	-37.7603	-37.6272	-37.481	-37.3638	-37.4102	-37.129	-36.9878	-37.1073	-36.8597	-36.7447	-36.495	-36.4182	-36.4326
							1545.06	-38.4916	-38.7352	-38.1456	-38.0175	-37.9102	-37.7707	-37.6368	-37.4899	-37.3721	-37.4195	-37.1362	-36.9945	-37.1155	-36.866	-36.7505	-36.4992	-36.4223	-36.4377
							1545.07	-38.5061	-38.7509	-38.158	-38.0292	-37.9213	-37.7811	-37.6465	-37.4989	-37.3804	-37.4289	-37.1435	-37.0012	-37.1236	-36.8724	-36.7564	-36.5035	-36.4264	-36.4427
							1545.08	-38.5207	-38.7667	-38.1705	-38.0411	-37.9325	-37.7916	-37.6563	-37.5079	-37.3888	-37.4383	-37.1508	-37.0079	-37.1319	-36.8789	-36.7622	-36.5078	-36.4305	-36.4478
							1545.09	-38.5353	-38.7826	-38.1831	-38.053	-37.9437	-37.8021	-37.6661	-37.5169	-37.3972	-37.4478	-37.1581	-37.0147	-37.1401	-36.8853	-36.7682	-36.5122	-36.4346	-36.453
							1545.1	-38.55	-38.7986	-38.1958	-38.065	-37.955	-37.8127	-37.676	-37.526	-37.4057	-37.4573	-37.1655	-37.0215	-37.1484	-36.8918	-36.7741	-36.5165	-36.4387	-36.4582
							1545.1	-38.5648	-38.8146	-38.2085	-38.077	-37.9664	-37.8233	-37.6859	-37.5351	-37.4142	-37.4669	-37.1729	-37.0284	-37.1567	-36.8984	-36.7801	-36.5209	-36.4429	-36.4634
							1545.11	-38.5797	-38.8308	-38.2212	-38.0891	-37.9778	-37.834	-37.6958	-37.5443	-37.4227	-37.4765	-37.1803	-37.0352	-37.1651	-36.9049	-36.7861	-36.5253	-36.4471	-36.4686
							1545.12	-38.5946	-38.847	-38.234	-38.1012	-37.9892	-37.8448	-37.7058	-37.5535	-37.4313	-37.4861	-37.1878	-37.0421	-37.1735	-36.9115	-36.7921	-36.5297	-36.4513	-36.4739
							1545.13	-38.6097	-38.8633	-38.2469	-38.1134	-38.0008	-37.8556	-37.7159	-37.5628	-37.44	-37.4958	-37.1953	-37.049	-37.182	-36.9181	-36.7982	-36.5341	-36.4555	-36.4792
							1545.14	-38.6248	-38.8797	-38.2599	-38.1257	-38.0123	-37.8664	-37.726	-37.5721	-37.4486	-37.5056	-37.2028	-37.056	-37.1905	-36.9248	-36.8043	-36.5386	-36.4598	-36.4846
							1545.14	-38.64	-38.8961	-38.2729	-38.138	-38.024	-37.8773	-37.7362	-37.5814	-37.4573	-37.5153	-37.2103	-37.063	-37.199	-36.9315	-36.8104	-36.5431	-36.4641	-36.49
							1545.15	-38.6553	-38.9127	-38.2859	-38.1504	-38.0357	-37.8883	-37.7464	-37.5908	-37.4661	-37.5252	-37.2179	-37.07	-37.2076	-36.9382	-36.8165	-36.5476	-36.4684	-36.4954
							1545.16	-38.6707	-38.9293	-38.2991	-38.1628	-38.0474	-37.8993	-37.7566	-37.6003	-37.4749	-37.535	-37.2256	-37.0771	-37.2162	-36.9449	-36.8227	-36.5521	-36.4727	-36.5008
							1545.17	-38.6862	-38.946	-38.3123	-38.1753	-38.0592	-37.9104	-37.7669	-37.6098	-37.4837	-37.5449	-37.2332	-37.0842	-37.2248	-36.9517	-36.8289	-36.5567	-36.477	-36.5063
							1545.18	-38.7018	-38.9629	-38.3256	-38.1879	-38.0711	-37.9215	-37.7773	-37.6193	-37.4926	-37.5549	-37.2409	-37.0913	-37.2335	-36.9585	-36.8352	-36.5613	-36.4814	-36.5118
							1545.18	-38.7174	-38.9798	-38.3389	-38.2005	-38.083	-37.9327	-37.7877	-37.6289	-37.5015	-37.5649	-37.2487	-37.0985	-37.2423	-36.9654	-36.8414	-36.5659	-36.4858	-36.5174
							1545.19	-38.7332	-38.9967	-38.3523	-38.2132	-38.095	-37.944	-37.7982	-37.6385	-37.5104	-37.575	-37.2565	-37.1057	-37.2511	-36.9722	-36.8477	-36.5705	-36.4902	-36.523
							1545.2	-38.7491	-39.0138	-38.3658	-38.2259	-38.107	-37.9553	-37.8087	-37.6482	-37.5194	-37.5851	-37.2643	-37.1129	-37.2599	-36.9792	-36.8541	-36.5752	-36.4946	-36.5286
							1545.21	-38.765	-39.031	-38.3793	-38.2387	-38.1191	-37.9666	-37.8193	-37.6579	-37.5285	-37.5952	-37.2721	-37.1201	-37.2687	-36.9861	-36.8604	-36.5798	-36.4991	-36.5343
							1545.22	-38.781	-39.0482	-38.3929	-38.2516	-38.1313	-37.978	-37.8299	-37.6677	-37.5376	-37.6054	-37.28	-37.1274	-37.2776	-36.9931	-36.8668	-36.5845	-36.5036	-36.54
							1545.22	-38.7972	-39.0656	-38.4066	-38.2646	-38.1435	-37.9895	-37.8406	-37.6775	-37.5467	-37.6156	-37.2879	-37.1348	-37.2866	-37.0001	-36.8733	-36.5893	-36.5081	-36.5457
							1545.23	-38.8134	-39.083	-38.4203	-38.2776	-38.1557	-38.001	-37.8514	-37.6873	-37.5559	-37.6259	-37.2958	-37.1421	-37.2956	-37.0071	-36.8797	-36.594	-36.5126	-36.5515
							1545.24	-38.8297	-39.1006	-38.4341	-38.2906	-38.1681	-38.0126	-37.8621	-37.6973	-37.5651	-37.6363	-37.3038	-37.1495	-37.3046	-37.0142	-36.8862	-36.5988	-36.5171	-36.5573
							1545.25	-38.8462	-39.1182	-38.448	-38.3038	-38.1804	-38.0243	-37.873	-37.7072	-37.5744	-37.6466	-37.3118	-37.1569	-37.3137	-37.0213	-36.8927	-36.6035	-36.5217	-36.5631
							1545.26	-38.8627	-39.1359	-38.462	-38.317	-38.1929	-38.0359	-37.8839	-37.7172	-37.5837	-37.6571	-37.3199	-37.1644	-37.3228	-37.0285	-36.8993	-36.6084	-36.5263	-36.569
							1545.26	-38.8793	-39.1537	-38.476	-38.3302	-38.2054	-38.0477	-37.8948	-37.7273	-37.5931	-37.6675	-37.328	-37.1719	-37.332	-37.0356	-36.9058	-36.6132	-36.5309	-36.5749
							1545.27	-38.8961	-39.1716	-38.4901	-38.3436	-38.218	-38.0595	-37.9059	-37.7374	-37.6025	-37.6781	-37.3361	-37.1794	-37.3412	-37.0429	-36.9124	-36.6181	-36.5356	-36.5809
							1545.28	-38.9129	-39.1896	-38.5043	-38.357	-38.2306	-38.0714	-37.9169	-37.7476	-37.6119	-37.6886	-37.3443	-37.187	-37.3504	-37.0501	-36.9191	-36.6229	-36.5403	-36.5868
							1545.29	-38.9299	-39.2078	-38.5186	-38.3704	-38.2433	-38.0833	-37.928	-37.7578	-37.6214	-37.6992	-37.3525	-37.1946	-37.3597	-37.0574	-36.9257	-36.6278	-36.545	-36.5929
							1545.3	-38.9469	-39.226	-38.5329	-38.384	-38.2561	-38.0953	-37.9392	-37.7681	-37.631	-37.7099	-37.3607	-37.2023	-37.369	-37.0647	-36.9325	-36.6328	-36.5497	-36.5989
							1545.3	-38.9641	-39.2443	-38.5473	-38.3976	-38.2689	-38.1073	-37.9504	-37.7784	-37.6406	-37.7206	-37.369	-37.2099	-37.3784	-37.0721	-36.9392	-36.6377	-36.5544	-36.605
							1545.31	-38.9813	-39.2627	-38.5618	-38.4113	-38.2818	-38.1194	-37.9617	-37.7887	-37.6502	-37.7314	-37.3773	-37.2176	-37.3879	-37.0795	-36.946	-36.6427	-36.5592	-36.6111
							1545.32	-38.9987	-39.2812	-38.5764	-38.425	-38.2947	-38.1316	-37.973	-37.7992	-37.6599	-37.7422	-37.3857	-37.2254	-37.3973	-37.0869	-36.9527	-36.6477	-36.564	-36.6173
							1545.33	-39.0162	-39.2998	-38.5911	-38.4388	-38.3077	-38.1438	-37.9844	-37.8096	-37.6697	-37.7531	-37.3941	-37.2332	-37.4068	-37.0943	-36.9596	-36.6527	-36.5688	-36.6235
							1545.34	-39.0337	-39.3185	-38.6058	-38.4527	-38.3208	-38.1561	-37.9959	-37.8202	-37.6795	-37.764	-37.4025	-37.241	-37.4164	-37.1018	-36.9664	-36.6578	-36.5736	-36.6297
							1545.34	-39.0514	-39.3373	-38.6206	-38.4667	-38.3339	-38.1684	-38.0074	-37.8307	-37.6893	-37.775	-37.411	-37.2489	-37.426	-37.1094	-36.9733	-36.6628	-36.5785	-36.636
							1545.35	-39.0692	-39.3562	-38.6356	-38.4807	-38.3471	-38.1808	-38.0189	-37.8414	-37.6992	-37.786	-37.4195	-37.2567	-37.4356	-37.1169	-36.9803	-36.6679	-36.5834	-36.6423
							1545.36	-39.0872	-39.3752	-38.6506	-38.4949	-38.3604	-38.1933	-38.0306	-37.8521	-37.7092	-37.797	-37.4281	-37.2647	-37.4453	-37.1245	-36.9872	-36.673	-36.5883	-36.6486
							1545.37	-39.1052	-39.3943	-38.6656	-38.5091	-38.3738	-38.2058	-38.0422	-37.8628	-37.7192	-37.8082	-37.4367	-37.2726	-37.4551	-37.1322	-36.9942	-36.6782	-36.5933	-36.655
							1545.38	-39.1233	-39.4136	-38.6808	-38.5233	-38.3872	-38.2184	-38.054	-37.8736	-37.7292	-37.8193	-37.4453	-37.2806	-37.4649	-37.1398	-37.0012	-36.6833	-36.5982	-36.6614
							1545.38	-39.1416	-39.4329	-38.6961	-38.5377	-38.4006	-38.2311	-38.0657	-37.8844	-37.7393	-37.8305	-37.454	-37.2887	-37.4747	-37.1476	-37.0083	-36.6885	-36.6032	-36.6678
							1545.39	-39.16	-39.4523	-38.7114	-38.5521	-38.4142	-38.2438	-38.0776	-37.8953	-37.7495	-37.8418	-37.4627	-37.2968	-37.4846	-37.1553	-37.0154	-36.6937	-36.6082	-36.6743
							1545.4	-39.1785	-39.4719	-38.7269	-38.5666	-38.4278	-38.2565	-38.0895	-37.9063	-37.7597	-37.8531	-37.4715	-37.3049	-37.4945	-37.1631	-37.0225	-36.699	-36.6133	-36.6808
							1545.41	-39.1971	-39.4915	-38.7424	-38.5812	-38.4415	-38.2694	-38.1014	-37.9173	-37.7699	-37.8645	-37.4803	-37.313	-37.5045	-37.1709	-37.0297	-36.7042	-36.6184	-36.6874
							1545.42	-39.2158	-39.5113	-38.758	-38.5959	-38.4552	-38.2823	-38.1134	-37.9283	-37.7802	-37.8759	-37.4891	-37.3212	-37.5145	-37.1788	-37.0369	-36.7095	-36.6235	-36.694
							1545.42	-39.2346	-39.5312	-38.7737	-38.6106	-38.4691	-38.2952	-38.1255	-37.9395	-37.7906	-37.8874	-37.498	-37.3294	-37.5246	-37.1867	-37.0441	-36.7148	-36.6286	-36.7006
							1545.43	-39.2536	-39.5511	-38.7895	-38.6254	-38.483	-38.3083	-38.1376	-37.9506	-37.801	-37.899	-37.507	-37.3377	-37.5347	-37.1946	-37.0513	-36.7202	-36.6337	-36.7073
							1545.44	-39.2727	-39.5712	-38.8055	-38.6404	-38.497	-38.3214	-38.1498	-37.9619	-37.8115	-37.9105	-37.5159	-37.346	-37.5448	-37.2026	-37.0586	-36.7255	-36.6389	-36.714
							1545.45	-39.2919	-39.5914	-38.8215	-38.6554	-38.511	-38.3345	-38.1621	-37.9732	-37.822	-37.9222	-37.5249	-37.3543	-37.555	-37.2106	-37.066	-36.7309	-36.6441	-36.7207
							1545.46	-39.3112	-39.6118	-38.8376	-38.6705	-38.5251	-38.3477	-38.1744	-37.9845	-37.8326	-37.9339	-37.534	-37.3627	-37.5653	-37.2186	-37.0733	-36.7363	-36.6494	-36.7275
							1545.46	-39.3306	-39.6322	-38.8538	-38.6856	-38.5393	-38.361	-38.1867	-37.9959	-37.8432	-37.9456	-37.5431	-37.3711	-37.5756	-37.2267	-37.0807	-36.7418	-36.6546	-36.7343
							1545.47	-39.3502	-39.6527	-38.8701	-38.7009	-38.5536	-38.3744	-38.1991	-38.0073	-37.8539	-37.9574	-37.5523	-37.3796	-37.586	-37.2348	-37.0881	-36.7472	-36.6599	-36.7411
							1545.48	-39.3698	-39.6734	-38.8865	-38.7162	-38.568	-38.3878	-38.2116	-38.0188	-37.8646	-37.9693	-37.5615	-37.3881	-37.5964	-37.243	-37.0956	-36.7527	-36.6652	-36.748
							1545.49	-39.3896	-39.6942	-38.903	-38.7317	-38.5824	-38.4013	-38.2242	-38.0304	-37.8754	-37.9812	-37.5707	-37.3966	-37.6068	-37.2512	-37.1031	-36.7582	-36.6706	-36.7549
							1545.5	-39.4096	-39.7151	-38.9196	-38.7472	-38.5969	-38.4149	-38.2368	-38.042	-37.8862	-37.9931	-37.58	-37.4052	-37.6173	-37.2594	-37.1106	-36.7637	-36.6759	-36.7619
							1545.5	-39.4296	-39.7361	-38.9363	-38.7628	-38.6115	-38.4285	-38.2494	-38.0537	-37.8971	-38.0052	-37.5894	-37.4138	-37.6279	-37.2677	-37.1182	-36.7693	-36.6813	-36.7689
							1545.51	-39.4498	-39.7572	-38.9531	-38.7785	-38.6262	-38.4422	-38.2622	-38.0654	-37.908	-38.0172	-37.5988	-37.4225	-37.6384	-37.276	-37.1258	-36.7749	-36.6868	-36.7759
							1545.52	-39.4701	-39.7785	-38.97	-38.7944	-38.641	-38.456	-38.275	-38.0772	-37.919	-38.0294	-37.6082	-37.4312	-37.6491	-37.2843	-37.1334	-36.7805	-36.6922	-36.783
							1545.53	-39.4905	-39.7998	-38.9871	-38.8103	-38.6558	-38.4698	-38.2878	-38.0891	-37.9301	-38.0416	-37.6177	-37.4399	-37.6598	-37.2927	-37.1411	-36.7861	-36.6977	-36.7901
							1545.54	-39.511	-39.8213	-39.0042	-38.8263	-38.6707	-38.4838	-38.3007	-38.101	-37.9412	-38.0538	-37.6272	-37.4487	-37.6705	-37.3012	-37.1488	-36.7918	-36.7032	-36.7972
							1545.54	-39.5317	-39.8429	-39.0214	-38.8424	-38.6858	-38.4978	-38.3137	-38.113	-37.9524	-38.0661	-37.6368	-37.4575	-37.6813	-37.3096	-37.1566	-36.7975	-36.7088	-36.8044
							1545.55	-39.5525	-39.8647	-39.0388	-38.8585	-38.7009	-38.5118	-38.3268	-38.125	-37.9636	-38.0785	-37.6464	-37.4664	-37.6922	-37.3181	-37.1643	-36.8032	-36.7143	-36.8116
							1545.56	-39.5734	-39.8865	-39.0563	-38.8748	-38.7161	-38.526	-38.3399	-38.1371	-37.9749	-38.0909	-37.6561	-37.4753	-37.7031	-37.3267	-37.1722	-36.809	-36.7199	-36.8189
							1545.57	-39.5945	-39.9085	-39.0738	-38.8912	-38.7313	-38.5402	-38.353	-38.1492	-37.9862	-38.1033	-37.6658	-37.4843	-37.714	-37.3353	-37.18	-36.8147	-36.7256	-36.8262
							1545.58	-39.6157	-39.9306	-39.0915	-38.9077	-38.7467	-38.5545	-38.3663	-38.1614	-37.9976	-38.1159	-37.6756	-37.4932	-37.725	-37.3439	-37.1879	-36.8205	-36.7312	-36.8335
							1545.58	-39.637	-39.9528	-39.1093	-38.9243	-38.7622	-38.5689	-38.3796	-38.1737	-38.009	-38.1284	-37.6854	-37.5023	-37.7361	-37.3526	-37.1958	-36.8264	-36.7369	-36.8408
							1545.59	-39.6585	-39.9752	-39.1272	-38.941	-38.7777	-38.5833	-38.393	-38.186	-38.0205	-38.1411	-37.6953	-37.5113	-37.7472	-37.3613	-37.2038	-36.8322	-36.7426	-36.8482
							1545.6	-39.68	-39.9977	-39.1452	-38.9578	-38.7934	-38.5979	-38.4064	-38.1984	-38.0321	-38.1538	-37.7052	-37.5205	-37.7583	-37.37	-37.2118	-36.8381	-36.7484	-36.8557
							1545.61	-39.7018	-40.0203	-39.1634	-38.9747	-38.8091	-38.6125	-38.4199	-38.2108	-38.0437	-38.1665	-37.7152	-37.5296	-37.7695	-37.3788	-37.2198	-36.844	-36.7541	-36.8632
							1545.62	-39.7236	-40.043	-39.1816	-38.9917	-38.8249	-38.6272	-38.4335	-38.2233	-38.0554	-38.1793	-37.7252	-37.5388	-37.7808	-37.3876	-37.2279	-36.85	-36.7599	-36.8707
							1545.62	-39.7456	-40.0659	-39.2	-39.0088	-38.8409	-38.642	-38.4472	-38.2359	-38.0671	-38.1922	-37.7353	-37.5481	-37.7921	-37.3965	-37.236	-36.8559	-36.7658	-36.8782
							1545.63	-39.7677	-40.0889	-39.2185	-39.026	-38.8569	-38.6568	-38.4609	-38.2485	-38.0789	-38.2052	-37.7454	-37.5574	-37.8034	-37.4054	-37.2442	-36.8619	-36.7717	-36.8858
							1545.64	-39.79	-40.112	-39.2371	-39.0434	-38.873	-38.6718	-38.4747	-38.2612	-38.0907	-38.2182	-37.7555	-37.5667	-37.8148	-37.4144	-37.2523	-36.868	-36.7775	-36.8934
							1545.65	-39.8124	-40.1352	-39.2558	-39.0608	-38.8892	-38.6868	-38.4886	-38.274	-38.1026	-38.2312	-37.7658	-37.5761	-37.8263	-37.4234	-37.2606	-36.874	-36.7835	-36.9011
							1545.66	-39.8349	-40.1586	-39.2746	-39.0783	-38.9055	-38.7019	-38.5025	-38.2868	-38.1146	-38.2443	-37.7761	-37.5855	-37.8378	-37.4324	-37.2688	-36.8801	-36.7894	-36.9088
							1545.66	-39.8576	-40.1821	-39.2936	-39.096	-38.922	-38.7171	-38.5166	-38.2997	-38.1266	-38.2575	-37.7864	-37.595	-37.8494	-37.4415	-37.2771	-36.8862	-36.7954	-36.9165
							1545.67	-39.8804	-40.2058	-39.3126	-39.1138	-38.9385	-38.7324	-38.5307	-38.3126	-38.1387	-38.2707	-37.7968	-37.6045	-37.861	-37.4506	-37.2855	-36.8923	-36.8015	-36.9243
							1545.68	-39.9034	-40.2296	-39.3318	-39.1316	-38.9551	-38.7478	-38.5448	-38.3256	-38.1508	-38.284	-37.8072	-37.6141	-37.8727	-37.4598	-37.2938	-36.8985	-36.8075	-36.9321
							1545.69	-39.9265	-40.2535	-39.3511	-39.1496	-38.9718	-38.7633	-38.5591	-38.3387	-38.163	-38.2974	-37.8177	-37.6237	-37.8844	-37.469	-37.3022	-36.9047	-36.8136	-36.94
							1545.7	-39.9498	-40.2776	-39.3706	-39.1677	-38.9887	-38.7789	-38.5734	-38.3519	-38.1753	-38.3108	-37.8282	-37.6333	-37.8962	-37.4782	-37.3107	-36.9109	-36.8197	-36.9479
							1545.7	-39.9732	-40.3018	-39.3901	-39.1859	-39.0056	-38.7945	-38.5879	-38.3651	-38.1876	-38.3243	-37.8388	-37.643	-37.908	-37.4875	-37.3192	-36.9172	-36.8259	-36.9558
							1545.71	-39.9967	-40.3262	-39.4098	-39.2042	-39.0226	-38.8103	-38.6024	-38.3783	-38.2	-38.3378	-37.8495	-37.6528	-37.9199	-37.4968	-37.3277	-36.9235	-36.832	-36.9638
							1545.72	-40.0205	-40.3507	-39.4296	-39.2227	-39.0398	-38.8261	-38.6169	-38.3917	-38.2124	-38.3514	-37.8602	-37.6626	-37.9319	-37.5062	-37.3363	-36.9298	-36.8383	-36.9718
							1545.73	-40.0443	-40.3753	-39.4495	-39.2412	-39.057	-38.8421	-38.6316	-38.4051	-38.2249	-38.3651	-37.8709	-37.6724	-37.9439	-37.5156	-37.3449	-36.9361	-36.8445	-36.9798
							1545.74	-40.0684	-40.4001	-39.4696	-39.2599	-39.0744	-38.8581	-38.6464	-38.4186	-38.2374	-38.3788	-37.8817	-37.6823	-37.9559	-37.5251	-37.3536	-36.9425	-36.8508	-36.9879
							1545.74	-40.0926	-40.425	-39.4897	-39.2787	-39.0918	-38.8742	-38.6612	-38.4321	-38.2501	-38.3926	-37.8926	-37.6922	-37.968	-37.5346	-37.3622	-36.9489	-36.8571	-36.996
							1545.75	-40.1169	-40.4501	-39.51	-39.2976	-39.1094	-38.8905	-38.6761	-38.4457	-38.2627	-38.4064	-37.9035	-37.7022	-37.9802	-37.5441	-37.371	-36.9554	-36.8634	-37.0042
							1545.76	-40.1414	-40.4753	-39.5304	-39.3166	-39.1271	-38.9068	-38.6911	-38.4594	-38.2755	-38.4204	-37.9145	-37.7123	-37.9924	-37.5537	-37.3797	-36.9618	-36.8698	-37.0124
							1545.77	-40.1661	-40.5006	-39.551	-39.3357	-39.1449	-38.9232	-38.7062	-38.4732	-38.2883	-38.4343	-37.9255	-37.7223	-38.0047	-37.5633	-37.3886	-36.9683	-36.8762	-37.0206
							1545.78	-40.191	-40.5262	-39.5717	-39.355	-39.1628	-38.9398	-38.7214	-38.487	-38.3012	-38.4484	-37.9366	-37.7325	-38.017	-37.573	-37.3974	-36.9749	-36.8827	-37.0289
							1545.78	-40.216	-40.5518	-39.5925	-39.3744	-39.1808	-38.9564	-38.7367	-38.5009	-38.3141	-38.4625	-37.9477	-37.7426	-38.0294	-37.5827	-37.4063	-36.9814	-36.8891	-37.0372
							1545.79	-40.2412	-40.5776	-39.6134	-39.3939	-39.199	-38.9731	-38.752	-38.5149	-38.3271	-38.4767	-37.9589	-37.7529	-38.0419	-37.5925	-37.4152	-36.988	-36.8956	-37.0455
							1545.8	-40.2666	-40.6036	-39.6344	-39.4135	-39.2172	-38.99	-38.7675	-38.529	-38.3402	-38.4909	-37.9701	-37.7632	-38.0544	-37.6023	-37.4242	-36.9946	-36.9022	-37.0539
							1545.81	-40.2922	-40.6297	-39.6556	-39.4332	-39.2356	-39.0069	-38.783	-38.5431	-38.3533	-38.5052	-37.9814	-37.7735	-38.0669	-37.6121	-37.4332	-37.0013	-36.9087	-37.0624
							1545.82	-40.318	-40.656	-39.677	-39.4531	-39.2541	-39.024	-38.7987	-38.5573	-38.3665	-38.5196	-37.9928	-37.7839	-38.0796	-37.622	-37.4423	-37.008	-36.9154	-37.0708
							1545.82	-40.3439	-40.6825	-39.6984	-39.4731	-39.2727	-39.0411	-38.8144	-38.5716	-38.3797	-38.534	-38.0042	-37.7943	-38.0922	-37.632	-37.4514	-37.0147	-36.922	-37.0794
							1545.83	-40.3701	-40.7091	-39.72	-39.4932	-39.2914	-39.0584	-38.8303	-38.5859	-38.3931	-38.5485	-38.0156	-37.8048	-38.105	-37.642	-37.4605	-37.0214	-36.9287	-37.0879
							1545.84	-40.3964	-40.7359	-39.7417	-39.5134	-39.3102	-39.0757	-38.8462	-38.6004	-38.4065	-38.5631	-38.0271	-37.8153	-38.1178	-37.652	-37.4697	-37.0282	-36.9354	-37.0965
							1545.85	-40.423	-40.7628	-39.7636	-39.5338	-39.3291	-39.0932	-38.8622	-38.6149	-38.4199	-38.5777	-38.0387	-37.8259	-38.1306	-37.6621	-37.4789	-37.035	-36.9421	-37.1051
							1545.86	-40.4497	-40.7899	-39.7856	-39.5542	-39.3482	-39.1108	-38.8784	-38.6295	-38.4335	-38.5924	-38.0503	-37.8365	-38.1435	-37.6722	-37.4882	-37.0419	-36.9489	-37.1138
							1545.86	-40.4767	-40.8172	-39.8077	-39.5748	-39.3674	-39.1285	-38.8946	-38.6441	-38.4471	-38.6072	-38.062	-37.8472	-38.1565	-37.6824	-37.4975	-37.0488	-36.9557	-37.1225
							1545.87	-40.5038	-40.8446	-39.83	-39.5956	-39.3867	-39.1463	-38.9109	-38.6589	-38.4608	-38.6221	-38.0738	-37.8579	-38.1695	-37.6926	-37.5069	-37.0557	-36.9626	-37.1313
							1545.88	-40.5312	-40.8722	-39.8524	-39.6164	-39.4061	-39.1642	-38.9274	-38.6737	-38.4745	-38.637	-38.0856	-37.8687	-38.1826	-37.7029	-37.5163	-37.0626	-36.9695	-37.14
							1545.89	-40.5588	-40.9	-39.8749	-39.6374	-39.4256	-39.1822	-38.9439	-38.6887	-38.4884	-38.6519	-38.0974	-37.8796	-38.1957	-37.7132	-37.5257	-37.0696	-36.9764	-37.1489
							1545.9	-40.5866	-40.9279	-39.8976	-39.6585	-39.4453	-39.2004	-38.9606	-38.7037	-38.5023	-38.667	-38.1093	-37.8905	-38.2089	-37.7235	-37.5352	-37.0766	-36.9833	-37.1578
							1545.9	-40.6147	-40.9561	-39.9205	-39.6798	-39.4651	-39.2186	-38.9773	-38.7188	-38.5162	-38.6821	-38.1213	-37.9014	-38.2222	-37.734	-37.5448	-37.0836	-36.9903	-37.1667
							1545.91	-40.643	-40.9844	-39.9434	-39.7011	-39.485	-39.237	-38.9942	-38.734	-38.5303	-38.6973	-38.1333	-37.9124	-38.2355	-37.7444	-37.5543	-37.0907	-36.9973	-37.1756
							1545.92	-40.6715	-41.0129	-39.9666	-39.7226	-39.505	-39.2555	-39.0111	-38.7492	-38.5444	-38.7125	-38.1454	-37.9235	-38.2489	-37.7549	-37.564	-37.0978	-37.0044	-37.1846
							1545.93	-40.7003	-41.0415	-39.9899	-39.7443	-39.5252	-39.2741	-39.0282	-38.7646	-38.5586	-38.7279	-38.1575	-37.9346	-38.2624	-37.7655	-37.5736	-37.105	-37.0115	-37.1937
							1545.94	-40.7294	-41.0704	-40.0133	-39.7661	-39.5454	-39.2928	-39.0454	-38.78	-38.5729	-38.7433	-38.1697	-37.9457	-38.2759	-37.7761	-37.5833	-37.1121	-37.0186	-37.2027
							1545.94	-40.7586	-41.0994	-40.0369	-39.788	-39.5658	-39.3116	-39.0627	-38.7956	-38.5873	-38.7587	-38.182	-37.9569	-38.2895	-37.7867	-37.5931	-37.1194	-37.0258	-37.2119
							1545.95	-40.7882	-41.1287	-40.0607	-39.81	-39.5864	-39.3306	-39.0801	-38.8112	-38.6017	-38.7743	-38.1943	-37.9682	-38.3031	-37.7974	-37.6029	-37.1266	-37.033	-37.221
							1545.96	-40.818	-41.1581	-40.0846	-39.8322	-39.607	-39.3496	-39.0976	-38.8269	-38.6162	-38.7899	-38.2067	-37.9795	-38.3168	-37.8082	-37.6127	-37.1339	-37.0402	-37.2302
							1545.97	-40.8481	-41.1877	-40.1087	-39.8545	-39.6278	-39.3688	-39.1152	-38.8427	-38.6308	-38.8056	-38.2191	-37.9909	-38.3305	-37.819	-37.6226	-37.1412	-37.0475	-37.2395
							1545.98	-40.8784	-41.2175	-40.1329	-39.877	-39.6487	-39.3881	-39.1329	-38.8586	-38.6455	-38.8213	-38.2316	-38.0023	-38.3444	-37.8298	-37.6326	-37.1485	-37.0548	-37.2487
							1545.98	-40.909	-41.2475	-40.1573	-39.8996	-39.6697	-39.4075	-39.1507	-38.8746	-38.6603	-38.8372	-38.2442	-38.0138	-38.3582	-37.8407	-37.6426	-37.1559	-37.0621	-37.2581
							1545.99	-40.94	-41.2777	-40.1819	-39.9223	-39.6909	-39.4271	-39.1687	-38.8907	-38.6752	-38.8531	-38.2568	-38.0254	-38.3722	-37.8517	-37.6526	-37.1633	-37.0695	-37.2674
							1546	-40.9712	-41.3081	-40.2067	-39.9452	-39.7122	-39.4467	-39.1868	-38.9069	-38.6901	-38.8691	-38.2695	-38.037	-38.3862	-37.8627	-37.6627	-37.1708	-37.0769	-37.2769
							1546.01	-41.0027	-41.3387	-40.2316	-39.9683	-39.7336	-39.4665	-39.2049	-38.9232	-38.7051	-38.8851	-38.2822	-38.0486	-38.4003	-37.8737	-37.6728	-37.1782	-37.0844	-37.2863
							1546.02	-41.0345	-41.3695	-40.2567	-39.9915	-39.7551	-39.4864	-39.2232	-38.9396	-38.7203	-38.9013	-38.295	-38.0603	-38.4144	-37.8848	-37.683	-37.1857	-37.0919	-37.2958
							1546.02	-41.0666	-41.4005	-40.282	-40.0148	-39.7768	-39.5064	-39.2417	-38.9561	-38.7355	-38.9175	-38.3079	-38.0721	-38.4286	-37.896	-37.6932	-37.1933	-37.0994	-37.3054
							1546.03	-41.099	-41.4317	-40.3075	-40.0383	-39.7987	-39.5266	-39.2602	-38.9727	-38.7508	-38.9337	-38.3208	-38.0839	-38.4429	-37.9072	-37.7035	-37.2009	-37.107	-37.3149
							1546.04	-41.1317	-41.4632	-40.3332	-40.0619	-39.8206	-39.5469	-39.2788	-38.9894	-38.7661	-38.9501	-38.3338	-38.0958	-38.4572	-37.9185	-37.7138	-37.2085	-37.1146	-37.3246
							1546.05	-41.1648	-41.4948	-40.359	-40.0858	-39.8427	-39.5673	-39.2976	-39.0062	-38.7816	-38.9665	-38.3468	-38.1077	-38.4716	-37.9298	-37.7242	-37.2161	-37.1222	-37.3342
							1546.06	-41.1981	-41.5266	-40.3851	-40.1097	-39.8649	-39.5878	-39.3165	-39.0231	-38.7972	-38.9831	-38.36	-38.1197	-38.4861	-37.9411	-37.7346	-37.2238	-37.1299	-37.344
							1546.06	-41.2318	-41.5587	-40.4114	-40.1339	-39.8873	-39.6084	-39.3355	-39.0401	-38.8129	-38.9996	-38.3732	-38.1318	-38.5006	-37.9526	-37.7451	-37.2316	-37.1376	-37.3537
							1546.07	-41.2659	-41.591	-40.4379	-40.1581	-39.9098	-39.6292	-39.3546	-39.0572	-38.8286	-39.0163	-38.3864	-38.1439	-38.5152	-37.964	-37.7556	-37.2393	-37.1453	-37.3635
							1546.08	-41.3002	-41.6235	-40.4645	-40.1826	-39.9325	-39.6501	-39.3738	-39.0744	-38.8445	-39.0331	-38.3997	-38.156	-38.5298	-37.9756	-37.7661	-37.2471	-37.1531	-37.3734
							1546.09	-41.335	-41.6562	-40.4914	-40.2072	-39.9553	-39.6711	-39.3932	-39.0918	-38.8604	-39.0499	-38.4131	-38.1683	-38.5446	-37.9871	-37.7768	-37.2549	-37.1609	-37.3832
							1546.1	-41.37	-41.6891	-40.5186	-40.232	-39.9782	-39.6923	-39.4126	-39.1092	-38.8765	-39.0668	-38.4266	-38.1805	-38.5594	-37.9988	-37.7874	-37.2628	-37.1688	-37.3932
							1546.1	-41.4055	-41.7223	-40.5459	-40.257	-40.0013	-39.7136	-39.4322	-39.1267	-38.8926	-39.0838	-38.4401	-38.1929	-38.5742	-38.0105	-37.7981	-37.2707	-37.1767	-37.4032
							1546.11	-41.4412	-41.7557	-40.5735	-40.2822	-40.0246	-39.735	-39.452	-39.1444	-38.9089	-39.1009	-38.4537	-38.2053	-38.5892	-38.0222	-37.8089	-37.2786	-37.1846	-37.4132
							1546.12	-41.4774	-41.7893	-40.6013	-40.3075	-40.048	-39.7566	-39.4718	-39.1621	-38.9252	-39.118	-38.4674	-38.2177	-38.6042	-38.034	-37.8197	-37.2866	-37.1926	-37.4233
							1546.13	-41.5139	-41.8231	-40.6293	-40.3331	-40.0715	-39.7783	-39.4918	-39.18	-38.9417	-39.1353	-38.4811	-38.2302	-38.6192	-38.0459	-37.8306	-37.2946	-37.2006	-37.4334
							1546.14	-41.5508	-41.8572	-40.6576	-40.3588	-40.0952	-39.8001	-39.5118	-39.198	-38.9582	-39.1526	-38.4949	-38.2428	-38.6344	-38.0578	-37.8415	-37.3027	-37.2086	-37.4435
							1546.14	-41.588	-41.8915	-40.6862	-40.3847	-40.1191	-39.8221	-39.5321	-39.2161	-38.9749	-39.17	-38.5088	-38.2554	-38.6496	-38.0697	-37.8525	-37.3107	-37.2167	-37.4537
							1546.15	-41.6256	-41.926	-40.715	-40.4108	-40.1431	-39.8442	-39.5524	-39.2343	-38.9916	-39.1874	-38.5227	-38.2681	-38.6648	-38.0817	-37.8635	-37.3189	-37.2248	-37.464
							1546.16	-41.6636	-41.9608	-40.744	-40.4371	-40.1673	-39.8664	-39.5728	-39.2526	-39.0085	-39.205	-38.5368	-38.2809	-38.6802	-38.0938	-37.8746	-37.327	-37.233	-37.4743
							1546.17	-41.702	-41.9957	-40.7733	-40.4637	-40.1917	-39.8888	-39.5934	-39.271	-39.0255	-39.2227	-38.5509	-38.2937	-38.6956	-38.106	-37.8857	-37.3352	-37.2412	-37.4846
							1546.18	-41.7407	-42.031	-40.8029	-40.4904	-40.2162	-39.9113	-39.6141	-39.2895	-39.0425	-39.2404	-38.5651	-38.3066	-38.7111	-38.1182	-37.8969	-37.3434	-37.2494	-37.495
							1546.18	-41.7799	-42.0664	-40.8327	-40.5173	-40.2409	-39.934	-39.635	-39.3082	-39.0597	-39.2582	-38.5793	-38.3195	-38.7266	-38.1304	-37.9081	-37.3517	-37.2577	-37.5054
							1546.19	-41.8194	-42.1021	-40.8629	-40.5445	-40.2658	-39.9568	-39.656	-39.327	-39.077	-39.2761	-38.5937	-38.3325	-38.7423	-38.1427	-37.9194	-37.36	-37.266	-37.5159
							1546.2	-41.8593	-42.138	-40.8933	-40.5719	-40.2908	-39.9797	-39.6771	-39.3458	-39.0944	-39.2941	-38.6081	-38.3456	-38.758	-38.1551	-37.9308	-37.3683	-37.2743	-37.5264
							1546.21	-41.8996	-42.1741	-40.924	-40.5995	-40.3161	-40.0029	-39.6983	-39.3648	-39.1119	-39.3122	-38.6226	-38.3587	-38.7737	-38.1675	-37.9422	-37.3767	-37.2827	-37.537
							1546.22	-41.9403	-42.2105	-40.955	-40.6273	-40.3415	-40.0261	-39.7196	-39.384	-39.1295	-39.3304	-38.6372	-38.3719	-38.7896	-38.18	-37.9536	-37.3851	-37.2911	-37.5476
							1546.22	-41.9814	-42.2471	-40.9863	-40.6554	-40.3671	-40.0495	-39.7411	-39.4032	-39.1473	-39.3486	-38.6518	-38.3852	-38.8055	-38.1925	-37.9651	-37.3936	-37.2996	-37.5583
							1546.23	-42.0229	-42.2839	-41.0179	-40.6837	-40.3929	-40.0731	-39.7628	-39.4226	-39.1651	-39.367	-38.6666	-38.3985	-38.8215	-38.2051	-37.9767	-37.4021	-37.3081	-37.569
							1546.24	-42.0647	-42.321	-41.0498	-40.7123	-40.4189	-40.0968	-39.7845	-39.442	-39.1831	-39.3854	-38.6814	-38.4119	-38.8375	-38.2178	-37.9883	-37.4106	-37.3166	-37.5798
							1546.25	-42.107	-42.3583	-41.0821	-40.7411	-40.4451	-40.1207	-39.8064	-39.4616	-39.2011	-39.404	-38.6963	-38.4253	-38.8537	-38.2305	-38	-37.4192	-37.3252	-37.5906
							1546.26	-42.1496	-42.3958	-41.1146	-40.7702	-40.4715	-40.1448	-39.8285	-39.4814	-39.2193	-39.4226	-38.7113	-38.4388	-38.8699	-38.2433	-38.0117	-37.4278	-37.3338	-37.6014
							1546.26	-42.1926	-42.4335	-41.1475	-40.7995	-40.4982	-40.169	-39.8506	-39.5012	-39.2376	-39.4413	-38.7264	-38.4524	-38.8862	-38.2561	-38.0235	-37.4365	-37.3425	-37.6123
							1546.27	-42.236	-42.4715	-41.1807	-40.8291	-40.525	-40.1934	-39.873	-39.5212	-39.256	-39.4601	-38.7416	-38.466	-38.9025	-38.269	-38.0353	-37.4452	-37.3512	-37.6233
							1546.28	-42.2798	-42.5097	-41.2143	-40.859	-40.552	-40.2179	-39.8954	-39.5412	-39.2746	-39.479	-38.7569	-38.4798	-38.919	-38.282	-38.0472	-37.4539	-37.3599	-37.6343
							1546.29	-42.3239	-42.5481	-41.2482	-40.8891	-40.5793	-40.2427	-39.918	-39.5615	-39.2932	-39.498	-38.7722	-38.4935	-38.9355	-38.295	-38.0591	-37.4627	-37.3687	-37.6453
							1546.3	-42.3685	-42.5867	-41.2824	-40.9195	-40.6068	-40.2676	-39.9408	-39.5818	-39.312	-39.5171	-38.7877	-38.5074	-38.952	-38.3081	-38.0711	-37.4715	-37.3775	-37.6564
							1546.3	-42.4134	-42.6256	-41.317	-40.9502	-40.6345	-40.2927	-39.9637	-39.6022	-39.3308	-39.5362	-38.8032	-38.5213	-38.9687	-38.3212	-38.0832	-37.4804	-37.3863	-37.6676
							1546.31	-42.4586	-42.6646	-41.352	-40.9812	-40.6625	-40.3179	-39.9867	-39.6228	-39.3498	-39.5555	-38.8189	-38.5353	-38.9854	-38.3345	-38.0953	-37.4893	-37.3952	-37.6788
							1546.32	-42.5042	-42.7039	-41.3873	-41.0125	-40.6907	-40.3434	-40.0099	-39.6435	-39.369	-39.5749	-38.8346	-38.5494	-39.0023	-38.3477	-38.1075	-37.4982	-37.4042	-37.69
							1546.33	-42.5502	-42.7433	-41.423	-41.0441	-40.7191	-40.3691	-40.0333	-39.6644	-39.3882	-39.5944	-38.8505	-38.5635	-39.0192	-38.3611	-38.1197	-37.5072	-37.4131	-37.7013
							1546.34	-42.5965	-42.783	-41.4591	-41.0761	-40.7478	-40.3949	-40.0568	-39.6853	-39.4075	-39.6139	-38.8664	-38.5777	-39.0361	-38.3745	-38.132	-37.5163	-37.4221	-37.7126
							1546.34	-42.6432	-42.8229	-41.4955	-41.1083	-40.7768	-40.421	-40.0805	-39.7064	-39.427	-39.6336	-38.8824	-38.592	-39.0532	-38.3879	-38.1443	-37.5253	-37.4312	-37.724
							1546.35	-42.6902	-42.863	-41.5323	-41.1408	-40.806	-40.4472	-40.1043	-39.7276	-39.4466	-39.6533	-38.8985	-38.6063	-39.0703	-38.4014	-38.1567	-37.5345	-37.4403	-37.7355
							1546.36	-42.7375	-42.9032	-41.5695	-41.1737	-40.8355	-40.4737	-40.1283	-39.749	-39.4663	-39.6732	-38.9148	-38.6207	-39.0875	-38.415	-38.1692	-37.5436	-37.4494	-37.747
							1546.37	-42.7851	-42.9436	-41.6071	-41.2069	-40.8652	-40.5003	-40.1525	-39.7705	-39.4862	-39.6932	-38.9311	-38.6352	-39.1048	-38.4287	-38.1817	-37.5528	-37.4586	-37.7585
							1546.38	-42.8331	-42.9843	-41.645	-41.2404	-40.8952	-40.5272	-40.1768	-39.7921	-39.5061	-39.7132	-38.9475	-38.6498	-39.1222	-38.4424	-38.1943	-37.5621	-37.4678	-37.7701
							1546.38	-42.8813	-43.0251	-41.6834	-41.2743	-40.9256	-40.5543	-40.2013	-39.8138	-39.5262	-39.7334	-38.964	-38.6644	-39.1396	-38.4562	-38.2069	-37.5714	-37.4771	-37.7817
							1546.39	-42.9298	-43.066	-41.7222	-41.3085	-40.9561	-40.5817	-40.226	-39.8357	-39.5464	-39.7536	-38.9807	-38.6792	-39.1572	-38.4701	-38.2196	-37.5807	-37.4863	-37.7934
							1546.4	-42.9786	-43.1072	-41.7613	-41.343	-40.987	-40.6092	-40.2509	-39.8577	-39.5668	-39.774	-38.9974	-38.694	-39.1748	-38.484	-38.2324	-37.5901	-37.4957	-37.8052
							1546.41	-43.0277	-43.1485	-41.8008	-41.3779	-41.0182	-40.637	-40.276	-39.8799	-39.5872	-39.7945	-39.0143	-38.7089	-39.1925	-38.498	-38.2452	-37.5995	-37.5051	-37.817
							1546.42	-43.077	-43.1899	-41.8408	-41.4132	-41.0497	-40.665	-40.3012	-39.9022	-39.6078	-39.815	-39.0312	-38.7238	-39.2103	-38.512	-38.2581	-37.609	-37.5145	-37.8288
							1546.42	-43.1266	-43.2315	-41.8811	-41.4488	-41.0815	-40.6933	-40.3267	-39.9246	-39.6285	-39.8357	-39.0483	-38.7389	-39.2281	-38.5261	-38.271	-37.6185	-37.5239	-37.8407
							1546.43	-43.1764	-43.2732	-41.9219	-41.4848	-41.1136	-40.7218	-40.3523	-39.9472	-39.6494	-39.8565	-39.0654	-38.754	-39.2461	-38.5403	-38.284	-37.6281	-37.5334	-37.8526
							1546.44	-43.2264	-43.315	-41.963	-41.5211	-41.146	-40.7506	-40.3781	-39.9699	-39.6703	-39.8774	-39.0827	-38.7692	-39.2641	-38.5546	-38.2971	-37.6377	-37.543	-37.8646
							1546.45	-43.2765	-43.357	-42.0045	-41.5579	-41.1788	-40.7796	-40.4042	-39.9928	-39.6914	-39.8984	-39.1001	-38.7845	-39.2822	-38.5689	-38.3102	-37.6474	-37.5526	-37.8767
							1546.46	-43.3269	-43.3991	-42.0465	-41.595	-41.2118	-40.8089	-40.4304	-40.0158	-39.7127	-39.9195	-39.1176	-38.7998	-39.3004	-38.5833	-38.3234	-37.6571	-37.5622	-37.8888
							1546.46	-43.3775	-43.4413	-42.0888	-41.6324	-41.2452	-40.8385	-40.4569	-40.0389	-39.734	-39.9407	-39.1352	-38.8153	-39.3187	-38.5978	-38.3366	-37.6668	-37.5719	-37.901
							1546.47	-43.4282	-43.4836	-42.1316	-41.6703	-41.279	-40.8683	-40.4836	-40.0623	-39.7555	-39.962	-39.1529	-38.8308	-39.3371	-38.6123	-38.3499	-37.6766	-37.5816	-37.9132
							1546.48	-43.479	-43.5259	-42.1747	-41.7085	-41.3131	-40.8984	-40.5105	-40.0857	-39.7771	-39.9834	-39.1707	-38.8464	-39.3556	-38.6269	-38.3633	-37.6865	-37.5914	-37.9254
							1546.49	-43.53	-43.5684	-42.2182	-41.7471	-41.3475	-40.9288	-40.5376	-40.1093	-39.7989	-40.0049	-39.1887	-38.8621	-39.3741	-38.6416	-38.3767	-37.6964	-37.6012	-37.9377
							1546.5	-43.581	-43.6109	-42.2622	-41.7862	-41.3823	-40.9595	-40.565	-40.1331	-39.8208	-40.0266	-39.2067	-38.8779	-39.3928	-38.6563	-38.3902	-37.7063	-37.611	-37.9501
							1546.5	-43.6321	-43.6535	-42.3065	-41.8256	-41.4174	-40.9905	-40.5926	-40.157	-39.8428	-40.0483	-39.2249	-38.8938	-39.4115	-38.6711	-38.4038	-37.7163	-37.6209	-37.9625
							1546.51	-43.6833	-43.6961	-42.3512	-41.8654	-41.4529	-41.0218	-40.6205	-40.1811	-39.865	-40.0702	-39.2432	-38.9098	-39.4303	-38.686	-38.4174	-37.7264	-37.6308	-37.975
							1546.52	-43.7346	-43.7388	-42.3963	-41.9055	-41.4888	-41.0534	-40.6486	-40.2054	-39.8873	-40.0922	-39.2616	-38.9259	-39.4492	-38.701	-38.4311	-37.7365	-37.6408	-37.9875
							1546.53	-43.7858	-43.7815	-42.4417	-41.9461	-41.525	-41.0853	-40.6769	-40.2298	-39.9098	-40.1143	-39.2801	-38.942	-39.4682	-38.716	-38.4448	-37.7466	-37.6508	-38.0001
							1546.54	-43.8371	-43.8242	-42.4875	-41.9871	-41.5616	-41.1175	-40.7055	-40.2544	-39.9324	-40.1365	-39.2987	-38.9583	-39.4873	-38.7311	-38.4587	-37.7568	-37.6609	-38.0127
							1546.54	-43.8883	-43.8669	-42.5337	-42.0284	-41.5986	-41.15	-40.7344	-40.2792	-39.9551	-40.1588	-39.3175	-38.9746	-39.5065	-38.7463	-38.4725	-37.7671	-37.671	-38.0254
							1546.55	-43.9395	-43.9096	-42.5803	-42.0702	-41.636	-41.1829	-40.7636	-40.3041	-39.978	-40.1812	-39.3364	-38.9911	-39.5257	-38.7615	-38.4865	-37.7774	-37.6812	-38.0381
							1546.56	-43.9907	-43.9522	-42.6272	-42.1123	-41.6737	-41.2161	-40.793	-40.3292	-40.0011	-40.2038	-39.3554	-39.0076	-39.5451	-38.7769	-38.5005	-37.7877	-37.6914	-38.0509
							1546.57	-44.0417	-43.9949	-42.6744	-42.1549	-41.7119	-41.2496	-40.8227	-40.3545	-40.0243	-40.2264	-39.3745	-39.0242	-39.5645	-38.7923	-38.5146	-37.7981	-37.7016	-38.0637
							1546.58	-44.0927	-44.0375	-42.722	-42.1978	-41.7504	-41.2834	-40.8527	-40.38	-40.0476	-40.2492	-39.3937	-39.0409	-39.5841	-38.8078	-38.5287	-37.8086	-37.7119	-38.0766
							1546.58	-44.1435	-44.08	-42.7699	-42.2411	-41.7893	-41.3176	-40.883	-40.4057	-40.0711	-40.2721	-39.413	-39.0578	-39.6037	-38.8233	-38.5429	-37.8191	-37.7223	-38.0896
							1546.59	-44.1941	-44.1225	-42.8181	-42.2848	-41.8286	-41.3522	-40.9136	-40.4315	-40.0948	-40.2951	-39.4325	-39.0747	-39.6235	-38.839	-38.5572	-37.8296	-37.7327	-38.1026
							1546.6	-44.2446	-44.1648	-42.8667	-42.3289	-41.8683	-41.3871	-40.9445	-40.4576	-40.1186	-40.3183	-39.4521	-39.0917	-39.6433	-38.8547	-38.5715	-37.8403	-37.7431	-38.1156
							1546.61	-44.2949	-44.2071	-42.9155	-42.3733	-41.9083	-41.4224	-40.9757	-40.4838	-40.1426	-40.3415	-39.4718	-39.1088	-39.6632	-38.8705	-38.5859	-37.8509	-37.7536	-38.1288
							1546.62	-44.3449	-44.2493	-42.9646	-42.4181	-41.9488	-41.458	-41.0072	-40.5103	-40.1668	-40.3649	-39.4917	-39.1261	-39.6832	-38.8863	-38.6004	-37.8616	-37.7641	-38.1419
							1546.62	-44.3947	-44.2913	-43.014	-42.4633	-41.9897	-41.494	-41.039	-40.537	-40.1911	-40.3884	-39.5116	-39.1434	-39.7033	-38.9023	-38.615	-37.8724	-37.7747	-38.1552
							1546.63	-44.4442	-44.3332	-43.0636	-42.5089	-42.0309	-41.5304	-41.0712	-40.5638	-40.2156	-40.412	-39.5317	-39.1608	-39.7236	-38.9183	-38.6296	-37.8832	-37.7853	-38.1684
							1546.64	-44.4934	-44.375	-43.1136	-42.5548	-42.0726	-41.5671	-41.1037	-40.5909	-40.2403	-40.4357	-39.552	-39.1783	-39.7439	-38.9344	-38.6443	-37.8941	-37.796	-38.1818
							1546.65	-44.5422	-44.4165	-43.1637	-42.6011	-42.1146	-41.6043	-41.1365	-40.6182	-40.2651	-40.4596	-39.5723	-39.196	-39.7643	-38.9506	-38.659	-37.905	-37.8067	-38.1952
							1546.66	-44.5907	-44.4579	-43.214	-42.6476	-42.1571	-41.6418	-41.1697	-40.6458	-40.2902	-40.4836	-39.5928	-39.2137	-39.7848	-38.9669	-38.6738	-37.916	-37.8175	-38.2086
							1546.66	-44.6388	-44.4991	-43.2646	-42.6946	-42.1999	-41.6796	-41.2033	-40.6735	-40.3154	-40.5077	-39.6134	-39.2316	-39.8054	-38.9832	-38.6887	-37.927	-37.8283	-38.2221
							1546.67	-44.6865	-44.54	-43.3154	-42.7418	-42.2431	-41.7179	-41.2371	-40.7015	-40.3408	-40.5319	-39.6341	-39.2495	-39.8261	-38.9997	-38.7037	-37.9381	-37.8392	-38.2357
							1546.68	-44.7338	-44.5807	-43.3663	-42.7894	-42.2867	-41.7566	-41.2714	-40.7297	-40.3664	-40.5563	-39.6549	-39.2676	-39.8469	-39.0162	-38.7187	-37.9493	-37.8501	-38.2493
							1546.69	-44.7806	-44.6212	-43.4174	-42.8373	-42.3307	-41.7956	-41.306	-40.7582	-40.3922	-40.5807	-39.6759	-39.2858	-39.8678	-39.0328	-38.7338	-37.9605	-37.8611	-38.263
							1546.7	-44.8269	-44.6614	-43.4686	-42.8855	-42.3751	-41.8351	-41.341	-40.7869	-40.4182	-40.6054	-39.697	-39.304	-39.8888	-39.0495	-38.749	-37.9717	-37.8721	-38.2767
							1546.7	-44.8726	-44.7013	-43.52	-42.934	-42.4198	-41.8749	-41.3764	-40.8158	-40.4443	-40.6301	-39.7183	-39.3224	-39.9099	-39.0663	-38.7643	-37.983	-37.8832	-38.2905
							1546.71	-44.9179	-44.7409	-43.5714	-42.9828	-42.4649	-41.9151	-41.4121	-40.8451	-40.4708	-40.655	-39.7397	-39.3409	-39.9312	-39.0831	-38.7796	-37.9944	-37.8943	-38.3043
							1546.72	-44.9625	-44.7802	-43.623	-43.0318	-42.5104	-41.9557	-41.4482	-40.8745	-40.4974	-40.68	-39.7612	-39.3596	-39.9525	-39.1001	-38.795	-38.0058	-37.9055	-38.3182
							1546.73	-45.0066	-44.8192	-43.6746	-43.0811	-42.5562	-41.9967	-41.4847	-40.9043	-40.5242	-40.7051	-39.7828	-39.3783	-39.9739	-39.1171	-38.8105	-38.0173	-37.9167	-38.3322
							1546.74	-45.05	-44.8578	-43.7262	-43.1306	-42.6023	-42.0382	-41.5217	-40.9343	-40.5513	-40.7303	-39.8046	-39.3971	-39.9954	-39.1342	-38.826	-38.0288	-37.928	-38.3462
							1546.74	-45.0928	-44.896	-43.7779	-43.1803	-42.6489	-42.08	-41.559	-40.9646	-40.5785	-40.7557	-39.8266	-39.4161	-40.0171	-39.1515	-38.8417	-38.0404	-37.9393	-38.3602
							1546.75	-45.1349	-44.9339	-43.8296	-43.2303	-42.6957	-42.1221	-41.5967	-40.9951	-40.606	-40.7812	-39.8486	-39.4352	-40.0388	-39.1688	-38.8574	-38.052	-37.9507	-38.3744
							1546.76	-45.1762	-44.9714	-43.8813	-43.2805	-42.7429	-42.1647	-41.6348	-41.026	-40.6338	-40.8069	-39.8708	-39.4543	-40.0606	-39.1862	-38.8731	-38.0637	-37.9621	-38.3885
							1546.77	-45.2169	-45.0084	-43.9329	-43.3308	-42.7904	-42.2077	-41.6733	-41.0571	-40.6618	-40.8327	-39.8932	-39.4737	-40.0826	-39.2036	-38.889	-38.0755	-37.9736	-38.4028
							1546.78	-45.2568	-45.045	-43.9845	-43.3813	-42.8382	-42.2511	-41.7122	-41.0885	-40.69	-40.8586	-39.9157	-39.4931	-40.1046	-39.2212	-38.9049	-38.0873	-37.9852	-38.4171
							1546.78	-45.2958	-45.0812	-44.0359	-43.432	-42.8863	-42.2948	-41.7515	-41.1203	-40.7185	-40.8846	-39.9383	-39.5126	-40.1268	-39.2389	-38.9209	-38.0991	-37.9967	-38.4314
							1546.79	-45.3341	-45.1169	-44.0873	-43.4828	-42.9347	-42.3389	-41.7913	-41.1523	-40.7472	-40.9108	-39.9611	-39.5323	-40.1491	-39.2566	-38.937	-38.1111	-38.0084	-38.4459
							1546.8	-45.3716	-45.1521	-44.1385	-43.5338	-42.9834	-42.3834	-41.8314	-41.1846	-40.7762	-40.9372	-39.984	-39.5521	-40.1715	-39.2745	-38.9532	-38.123	-38.0201	-38.4603
							1546.81	-45.4081	-45.1868	-44.1896	-43.5848	-43.0324	-42.4283	-41.872	-41.2173	-40.8055	-40.9636	-40.0071	-39.5719	-40.194	-39.2925	-38.9695	-38.1351	-38.0319	-38.4749
							1546.82	-45.4438	-45.221	-44.2405	-43.6359	-43.0816	-42.4736	-41.913	-41.2503	-40.835	-40.9902	-40.0303	-39.592	-40.2166	-39.3105	-38.9858	-38.1472	-38.0437	-38.4895
							1546.82	-45.4786	-45.2547	-44.2912	-43.6871	-43.1311	-42.5192	-41.9544	-41.2836	-40.8648	-41.017	-40.0537	-39.6121	-40.2393	-39.3286	-39.0022	-38.1593	-38.0555	-38.5041
							1546.83	-45.5124	-45.2878	-44.3416	-43.7383	-43.1808	-42.5651	-41.9962	-41.3172	-40.8949	-41.0438	-40.0773	-39.6324	-40.2621	-39.3469	-39.0187	-38.1715	-38.0675	-38.5188
							1546.84	-45.5453	-45.3203	-44.3918	-43.7895	-43.2307	-42.6114	-42.0385	-41.3512	-40.9253	-41.0708	-40.101	-39.6528	-40.285	-39.3652	-39.0353	-38.1838	-38.0794	-38.5336
							1546.85	-45.5771	-45.3523	-44.4417	-43.8408	-43.2808	-42.6581	-42.0811	-41.3855	-40.956	-41.098	-40.1249	-39.6733	-40.3081	-39.3836	-39.0519	-38.1961	-38.0915	-38.5484
							1546.86	-45.608	-45.3837	-44.4913	-43.892	-43.3311	-42.7051	-42.1242	-41.4201	-40.987	-41.1253	-40.1489	-39.6939	-40.3312	-39.4022	-39.0687	-38.2085	-38.1036	-38.5633
							1546.86	-45.6378	-45.4144	-44.5406	-43.9432	-43.3815	-42.7524	-42.1677	-41.4551	-41.0182	-41.1527	-40.1731	-39.7147	-40.3545	-39.4208	-39.0855	-38.2209	-38.1157	-38.5783
							1546.87	-45.6666	-45.4445	-44.5895	-43.9943	-43.4321	-42.8	-42.2116	-41.4904	-41.0498	-41.1803	-40.1975	-39.7355	-40.3779	-39.4395	-39.1024	-38.2335	-38.1279	-38.5933
							1546.88	-45.6944	-45.474	-44.638	-44.0453	-43.4829	-42.848	-42.2559	-41.5261	-41.0817	-41.208	-40.222	-39.7566	-40.4014	-39.4584	-39.1194	-38.246	-38.1402	-38.6084
							1546.89	-45.721	-45.5028	-44.6861	-44.0962	-43.5338	-42.8962	-42.3006	-41.5621	-41.1139	-41.2359	-40.2468	-39.7777	-40.425	-39.4773	-39.1365	-38.2586	-38.1525	-38.6235
							1546.9	-45.7465	-45.5309	-44.7337	-44.147	-43.5847	-42.9447	-42.3457	-41.5985	-41.1465	-41.2639	-40.2717	-39.799	-40.4487	-39.4963	-39.1537	-38.2713	-38.1649	-38.6387
							1546.9	-45.7709	-45.5583	-44.7808	-44.1977	-43.6358	-42.9935	-42.3912	-41.6353	-41.1793	-41.2921	-40.2968	-39.8204	-40.4725	-39.5155	-39.171	-38.2841	-38.1773	-38.6539
							1546.91	-45.7941	-45.5851	-44.8275	-44.2481	-43.6869	-43.0426	-42.437	-41.6724	-41.2125	-41.3204	-40.3221	-39.8419	-40.4965	-39.5347	-39.1883	-38.2969	-38.1898	-38.6693
							1546.92	-45.8162	-45.6111	-44.8736	-44.2984	-43.7381	-43.0919	-42.4833	-41.7099	-41.2461	-41.3488	-40.3475	-39.8635	-40.5206	-39.554	-39.2058	-38.3098	-38.2023	-38.6846
							1546.93	-45.8371	-45.6363	-44.9192	-44.3484	-43.7893	-43.1415	-42.5299	-41.7477	-41.28	-41.3774	-40.3732	-39.8853	-40.5448	-39.5735	-39.2233	-38.3227	-38.2149	-38.7001
							1546.94	-45.8568	-45.6609	-44.9642	-44.3981	-43.8405	-43.1913	-42.577	-41.786	-41.3142	-41.4062	-40.3991	-39.9073	-40.5691	-39.5931	-39.2409	-38.3357	-38.2276	-38.7156
							1546.94	-45.8752	-45.6846	-45.0085	-44.4476	-43.8917	-43.2413	-42.6243	-41.8246	-41.3488	-41.4351	-40.4251	-39.9293	-40.5935	-39.6127	-39.2586	-38.3488	-38.2403	-38.7311
							1546.95	-45.8925	-45.7076	-45.0522	-44.4968	-43.9428	-43.2915	-42.6721	-41.8636	-41.3838	-41.4641	-40.4514	-39.9515	-40.618	-39.6325	-39.2765	-38.3619	-38.2531	-38.7468
							1546.96	-45.9085	-45.7298	-45.0953	-44.5456	-43.9939	-43.3419	-42.7202	-41.9029	-41.4191	-41.4933	-40.4779	-39.9738	-40.6427	-39.6524	-39.2944	-38.3751	-38.266	-38.7624
							1546.97	-45.9232	-45.7512	-45.1376	-44.5941	-44.0449	-43.3924	-42.7686	-41.9427	-41.4548	-41.5226	-40.5046	-39.9963	-40.6675	-39.6723	-39.3124	-38.3883	-38.2789	-38.7782
							1546.98	-45.9367	-45.7718	-45.1793	-44.6421	-44.0957	-43.4431	-42.8173	-41.9828	-41.4909	-41.5521	-40.5315	-40.0189	-40.6924	-39.6924	-39.3304	-38.4016	-38.2918	-38.794
							1546.98	-45.9489	-45.7915	-45.2202	-44.6898	-44.1465	-43.494	-42.8664	-42.0233	-41.5273	-41.5818	-40.5586	-40.0417	-40.7174	-39.7126	-39.3486	-38.415	-38.3049	-38.8099
							1546.99	-45.9599	-45.8104	-45.2603	-44.737	-44.1971	-43.5449	-42.9158	-42.0642	-41.5641	-41.6116	-40.586	-40.0645	-40.7425	-39.733	-39.3669	-38.4285	-38.318	-38.8258
							1547	-45.9695	-45.8285	-45.2996	-44.7838	-44.2475	-43.596	-42.9654	-42.1054	-41.6013	-41.6415	-40.6136	-40.0876	-40.7678	-39.7534	-39.3853	-38.442	-38.3311	-38.8418
							1547.01	-45.9778	-45.8457	-45.338	-44.8301	-44.2977	-43.6471	-43.0154	-42.147	-41.6389	-41.6717	-40.6414	-40.1107	-40.7931	-39.7739	-39.4038	-38.4556	-38.3443	-38.8579
							1547.02	-45.9848	-45.8621	-45.3756	-44.8758	-44.3477	-43.6983	-43.0656	-42.1891	-41.6769	-41.7019	-40.6695	-40.1341	-40.8186	-39.7946	-39.4223	-38.4692	-38.3576	-38.874
							1547.02	-45.9905	-45.8775	-45.4124	-44.921	-44.3974	-43.7495	-43.1161	-42.2314	-41.7152	-41.7323	-40.6978	-40.1575	-40.8443	-39.8153	-39.441	-38.483	-38.371	-38.8902
							1547.03	-45.9949	-45.8921	-45.4482	-44.9656	-44.4469	-43.8007	-43.1668	-42.2742	-41.754	-41.7629	-40.7264	-40.1811	-40.87	-39.8362	-39.4598	-38.4968	-38.3844	-38.9064
							1547.04	-45.9979	-45.9058	-45.4831	-45.0096	-44.496	-43.852	-43.2177	-42.3173	-41.7932	-41.7936	-40.7553	-40.2049	-40.8959	-39.8572	-39.4787	-38.5106	-38.3978	-38.9228
							1547.05	-45.9996	-45.9186	-45.517	-45.053	-44.5448	-43.9032	-43.2689	-42.3608	-41.8327	-41.8245	-40.7844	-40.2288	-40.9218	-39.8783	-39.4976	-38.5246	-38.4114	-38.9391
							1547.06	-46	-45.9305	-45.55	-45.0957	-44.5933	-43.9544	-43.3202	-42.4047	-41.8727	-41.8556	-40.8137	-40.2529	-40.9479	-39.8996	-39.5167	-38.5386	-38.425	-38.9556
							1547.06	-45.999	-45.9414	-45.5819	-45.1378	-44.6413	-44.0055	-43.3718	-42.4489	-41.913	-41.8867	-40.8434	-40.2771	-40.9742	-39.9209	-39.5359	-38.5527	-38.4386	-38.9721
							1547.07	-45.9967	-45.9515	-45.6129	-45.1791	-44.689	-44.0565	-43.4235	-42.4934	-41.9538	-41.9181	-40.8733	-40.3015	-41.0005	-39.9424	-39.5552	-38.5668	-38.4524	-38.9887
							1547.08	-45.9931	-45.9606	-45.6428	-45.2197	-44.7362	-44.1074	-43.4753	-42.5383	-41.995	-41.9496	-40.9035	-40.326	-41.027	-39.964	-39.5745	-38.5811	-38.4661	-39.0053
							1547.09	-45.9882	-45.9688	-45.6716	-45.2595	-44.7829	-44.1581	-43.5272	-42.5836	-42.0365	-41.9813	-40.934	-40.3507	-41.0536	-39.9857	-39.594	-38.5954	-38.48	-39.022
							1547.1	-45.9819	-45.976	-45.6993	-45.2985	-44.8291	-44.2087	-43.5793	-42.6292	-42.0785	-42.0131	-40.9648	-40.3756	-41.0803	-40.0075	-39.6136	-38.6097	-38.4939	-39.0388
							1547.1	-45.9742	-45.9823	-45.7259	-45.3367	-44.8749	-44.2591	-43.6314	-42.6751	-42.1208	-42.0451	-40.9959	-40.4006	-41.1072	-40.0294	-39.6333	-38.6242	-38.5079	-39.0557
							1547.11	-45.9653	-45.9876	-45.7514	-45.3741	-44.9201	-44.3093	-43.6836	-42.7214	-42.1636	-42.0772	-41.0273	-40.4258	-41.1342	-40.0515	-39.6531	-38.6387	-38.522	-39.0726
							1547.12	-45.955	-45.992	-45.7757	-45.4106	-44.9647	-44.3593	-43.7359	-42.7679	-42.2067	-42.1095	-41.059	-40.4511	-41.1613	-40.0737	-39.6731	-38.6534	-38.5361	-39.0895
							1547.13	-45.9435	-45.9954	-45.7989	-45.4462	-45.0087	-44.409	-43.7881	-42.8148	-42.2503	-42.142	-41.0911	-40.4767	-41.1885	-40.096	-39.6931	-38.6681	-38.5503	-39.1066
							1547.14	-45.9306	-45.9979	-45.8208	-45.4809	-45.052	-44.4584	-43.8404	-42.862	-42.2942	-42.1746	-41.1234	-40.5024	-41.2158	-40.1184	-39.7132	-38.6828	-38.5646	-39.1237
							1547.14	-45.9164	-45.9994	-45.8416	-45.5147	-45.0947	-44.5075	-43.8926	-42.9094	-42.3385	-42.2073	-41.1561	-40.5283	-41.2433	-40.141	-39.7335	-38.6977	-38.5789	-39.1408
							1547.15	-45.901	-46	-45.8612	-45.5475	-45.1368	-44.5563	-43.9448	-42.9572	-42.3832	-42.2403	-41.1891	-40.5543	-41.2709	-40.1637	-39.7538	-38.7126	-38.5933	-39.1581
							1547.16	-45.8842	-45.9996	-45.8795	-45.5793	-45.1781	-44.6046	-43.997	-43.0052	-42.4283	-42.2733	-41.2225	-40.5806	-41.2987	-40.1865	-39.7743	-38.7277	-38.6078	-39.1754
							1547.17	-45.8662	-45.9982	-45.8965	-45.6101	-45.2187	-44.6526	-44.049	-43.0535	-42.4738	-42.3066	-41.2562	-40.607	-41.3265	-40.2094	-39.7949	-38.7428	-38.6223	-39.1928
							1547.18	-45.847	-45.9959	-45.9123	-45.6399	-45.2585	-44.7002	-44.1009	-43.102	-42.5196	-42.3399	-41.2903	-40.6336	-41.3545	-40.2325	-39.8155	-38.758	-38.637	-39.2102
							1547.18	-45.8265	-45.9926	-45.9269	-45.6686	-45.2975	-44.7474	-44.1526	-43.1507	-42.5658	-42.3735	-41.3247	-40.6604	-41.3826	-40.2557	-39.8363	-38.7732	-38.6516	-39.2277
							1547.19	-45.8048	-45.9884	-45.9401	-45.6962	-45.3357	-44.794	-44.2042	-43.1997	-42.6123	-42.4072	-41.3594	-40.6874	-41.4108	-40.279	-39.8573	-38.7886	-38.6664	-39.2453
							1547.2	-45.7818	-45.9832	-45.9521	-45.7228	-45.3731	-44.8402	-44.2556	-43.2488	-42.6592	-42.441	-41.3945	-40.7147	-41.4392	-40.3025	-39.8783	-38.8041	-38.6812	-39.2629
							1547.21	-45.7577	-45.9771	-45.9627	-45.7482	-45.4096	-44.8858	-44.3068	-43.2982	-42.7065	-42.475	-41.43	-40.7421	-41.4677	-40.3261	-39.8994	-38.8196	-38.6961	-39.2807
							1547.22	-45.7324	-45.97	-45.972	-45.7725	-45.4452	-44.9309	-44.3577	-43.3478	-42.754	-42.5092	-41.4659	-40.7697	-41.4963	-40.3498	-39.9207	-38.8353	-38.7111	-39.2984
							1547.22	-45.706	-45.9619	-45.98	-45.7957	-45.4799	-44.9754	-44.4084	-43.3975	-42.8019	-42.5435	-41.5021	-40.7975	-41.5251	-40.3737	-39.9421	-38.851	-38.7262	-39.3163
							1547.23	-45.6783	-45.953	-45.9867	-45.8177	-45.5137	-45.0192	-44.4587	-43.4473	-42.8501	-42.5779	-41.5388	-40.8255	-41.5539	-40.3977	-39.9636	-38.8668	-38.7413	-39.3342
							1547.24	-45.6496	-45.9431	-45.9921	-45.8385	-45.5465	-45.0625	-44.5087	-43.4973	-42.8986	-42.6125	-41.5758	-40.8537	-41.5829	-40.4218	-39.9852	-38.8827	-38.7565	-39.3522
							1547.25	-45.6198	-45.9322	-45.9961	-45.8581	-45.5783	-45.105	-44.5584	-43.5474	-42.9474	-42.6472	-41.6132	-40.8822	-41.6121	-40.4461	-40.0069	-38.8987	-38.7718	-39.3703
							1547.26	-45.5888	-45.9205	-45.9987	-45.8765	-45.6091	-45.1469	-44.6077	-43.5976	-42.9965	-42.6821	-41.6509	-40.9109	-41.6413	-40.4705	-40.0288	-38.9148	-38.7871	-39.3884
							1547.26	-45.5568	-45.9078	-46	-45.8936	-45.6389	-45.1881	-44.6565	-43.6479	-43.0458	-42.7171	-41.6891	-40.9398	-41.6707	-40.4951	-40.0508	-38.931	-38.8026	-39.4066
							1547.27	-45.5238	-45.8942	-45.9999	-45.9095	-45.6676	-45.2285	-44.705	-43.6983	-43.0954	-42.7523	-41.7277	-40.9689	-41.7002	-40.5198	-40.0729	-38.9473	-38.8181	-39.4249
							1547.28	-45.4897	-45.8797	-45.9985	-45.9242	-45.6953	-45.2682	-44.7529	-43.7486	-43.1453	-42.7876	-41.7666	-40.9983	-41.7299	-40.5446	-40.0951	-38.9637	-38.8337	-39.4432
							1547.29	-45.4547	-45.8643	-45.9958	-45.9376	-45.7219	-45.307	-44.8004	-43.7991	-43.1953	-42.823	-41.806	-41.0279	-41.7597	-40.5696	-40.1174	-38.9802	-38.8494	-39.4616
							1547.3	-45.4186	-45.848	-45.9917	-45.9497	-45.7473	-45.3451	-44.8473	-43.8495	-43.2456	-42.8586	-41.8458	-41.0577	-41.7896	-40.5947	-40.1399	-38.9968	-38.8651	-39.4801
							1547.3	-45.3816	-45.8309	-45.9862	-45.9605	-45.7716	-45.3823	-44.8936	-43.8999	-43.2961	-42.8943	-41.8859	-41.0878	-41.8196	-40.62	-40.1625	-39.0135	-38.8809	-39.4986
							1547.31	-45.3437	-45.8129	-45.9794	-45.9701	-45.7948	-45.4186	-44.9394	-43.9502	-43.3468	-42.9301	-41.9265	-41.1181	-41.8498	-40.6454	-40.1852	-39.0303	-38.8969	-39.5173
							1547.32	-45.3049	-45.794	-45.9713	-45.9783	-45.8168	-45.454	-44.9846	-44.0005	-43.3976	-42.9661	-41.9675	-41.1487	-41.88	-40.6709	-40.208	-39.0472	-38.9128	-39.536
							1547.33	-45.2652	-45.7743	-45.9618	-45.9852	-45.8377	-45.4885	-45.0291	-44.0507	-43.4486	-43.0021	-42.0088	-41.1795	-41.9104	-40.6967	-40.231	-39.0642	-38.9289	-39.5547
							1547.34	-45.2246	-45.7537	-45.951	-45.9908	-45.8573	-45.522	-45.073	-44.1009	-43.4997	-43.0383	-42.0506	-41.2106	-41.941	-40.7225	-40.2541	-39.0813	-38.9451	-39.5736
							1547.34	-45.1832	-45.7323	-45.9389	-45.9951	-45.8757	-45.5546	-45.1161	-44.1508	-43.551	-43.0746	-42.0928	-41.2419	-41.9717	-40.7485	-40.2773	-39.0985	-38.9613	-39.5925
							1547.35	-45.141	-45.7101	-45.9254	-45.9981	-45.8929	-45.5862	-45.1586	-44.2007	-43.6023	-43.1111	-42.1354	-41.2735	-42.0024	-40.7747	-40.3007	-39.1158	-38.9777	-39.6114
							1547.36	-45.0981	-45.6871	-45.9106	-45.9997	-45.9089	-45.6168	-45.2002	-44.2503	-43.6537	-43.1476	-42.1784	-41.3054	-42.0334	-40.801	-40.3242	-39.1332	-38.9941	-39.6305
							1547.37	-45.0544	-45.6633	-45.8946	-46	-45.9236	-45.6463	-45.2411	-44.2998	-43.7052	-43.1842	-42.2217	-41.3375	-42.0644	-40.8275	-40.3478	-39.1508	-39.0106	-39.6496
							1547.38	-45.0099	-45.6388	-45.8772	-45.999	-45.937	-45.6748	-45.2812	-44.3491	-43.7567	-43.221	-42.2655	-41.37	-42.0956	-40.8542	-40.3715	-39.1684	-39.0272	-39.6688
							1547.38	-44.9648	-45.6135	-45.8586	-45.9966	-45.9492	-45.7022	-45.3205	-44.3981	-43.8082	-43.2578	-42.3097	-41.4027	-42.1269	-40.881	-40.3954	-39.1861	-39.0438	-39.6881
							1547.39	-44.919	-45.5874	-45.8387	-45.9929	-45.9601	-45.7285	-45.3589	-44.4468	-43.8597	-43.2947	-42.3542	-41.4356	-42.1583	-40.9079	-40.4194	-39.204	-39.0606	-39.7074
							1547.4	-44.8726	-45.5606	-45.8176	-45.9878	-45.9697	-45.7537	-45.3964	-44.4952	-43.9112	-43.3317	-42.3992	-41.4689	-42.1898	-40.935	-40.4436	-39.222	-39.0774	-39.7268
							1547.41	-44.8256	-45.5331	-45.7952	-45.9815	-45.9779	-45.7778	-45.433	-44.5434	-43.9626	-43.3688	-42.4445	-41.5025	-42.2215	-40.9623	-40.4679	-39.24	-39.0944	-39.7463
							1547.42	-44.778	-45.5048	-45.7717	-45.9738	-45.9849	-45.8007	-45.4686	-44.5911	-44.014	-43.406	-42.4902	-41.5363	-42.2533	-40.9898	-40.4923	-39.2582	-39.1114	-39.7659
							1547.42	-44.7298	-45.4759	-45.7469	-45.9648	-45.9906	-45.8224	-45.5033	-44.6385	-44.0652	-43.4433	-42.5362	-41.5705	-42.2852	-41.0174	-40.5169	-39.2765	-39.1285	-39.7855
							1547.43	-44.6811	-45.4463	-45.7209	-45.9544	-45.9949	-45.8429	-45.537	-44.6855	-44.1164	-43.4806	-42.5827	-41.6049	-42.3173	-41.0452	-40.5416	-39.295	-39.1458	-39.8052
							1547.44	-44.632	-45.4161	-45.6937	-45.9428	-45.9979	-45.8623	-45.5696	-44.7321	-44.1674	-43.518	-42.6294	-41.6396	-42.3494	-41.0731	-40.5664	-39.3135	-39.1631	-39.825
							1547.45	-44.5823	-45.3852	-45.6655	-45.9299	-45.9996	-45.8804	-45.6013	-44.7783	-44.2182	-43.5554	-42.6766	-41.6747	-42.3817	-41.1013	-40.5914	-39.3321	-39.1805	-39.8449
							1547.46	-44.5322	-45.3536	-45.636	-45.9156	-46	-45.8973	-45.6318	-44.8239	-44.2689	-43.5929	-42.724	-41.71	-42.4141	-41.1296	-40.6165	-39.3509	-39.198	-39.8648
							1547.46	-44.4817	-45.3215	-45.6055	-45.9001	-45.999	-45.9129	-45.6613	-44.8691	-44.3193	-43.6305	-42.7718	-41.7457	-42.4466	-41.1581	-40.6418	-39.3698	-39.2156	-39.8848
							1547.47	-44.4309	-45.2887	-45.5739	-45.8834	-45.9967	-45.9273	-45.6897	-44.9137	-44.3695	-43.6681	-42.8199	-41.7817	-42.4792	-41.1867	-40.6672	-39.3888	-39.2332	-39.9049
							1547.48	-44.3796	-45.2554	-45.5412	-45.8653	-45.9931	-45.9404	-45.717	-44.9578	-44.4194	-43.7057	-42.8684	-41.8179	-42.512	-41.2156	-40.6928	-39.4079	-39.251	-39.9251
							1547.49	-44.3281	-45.2215	-45.5074	-45.846	-45.9882	-45.9523	-45.7431	-45.0013	-44.469	-43.7433	-42.9171	-41.8545	-42.5448	-41.2446	-40.7185	-39.4271	-39.2689	-39.9453
							1547.5	-44.2762	-45.1871	-45.4727	-45.8255	-45.9819	-45.9628	-45.768	-45.0442	-44.5183	-43.781	-42.9661	-41.8915	-42.5778	-41.2738	-40.7444	-39.4464	-39.2869	-39.9656
							1547.5	-44.2241	-45.1522	-45.4369	-45.8037	-45.9743	-45.9721	-45.7918	-45.0864	-44.5672	-43.8187	-43.0154	-41.9287	-42.6109	-41.3032	-40.7704	-39.4659	-39.305	-39.986
							1547.51	-44.1717	-45.1167	-45.4002	-45.7808	-45.9653	-45.98	-45.8143	-45.1281	-44.6158	-43.8563	-43.065	-41.9662	-42.6441	-41.3327	-40.7965	-39.4855	-39.3231	-40.0065
							1547.52	-44.1192	-45.0807	-45.3625	-45.7566	-45.9551	-45.9867	-45.8356	-45.169	-44.6639	-43.894	-43.1148	-42.0041	-42.6774	-41.3625	-40.8229	-39.5052	-39.3414	-40.027
							1547.53	-44.0664	-45.0443	-45.3239	-45.7313	-45.9436	-45.992	-45.8557	-45.2092	-44.7117	-43.9317	-43.1648	-42.0423	-42.7108	-41.3924	-40.8493	-39.525	-39.3598	-40.0476
							1547.54	-44.0135	-45.0074	-45.2844	-45.7048	-45.9307	-45.996	-45.8746	-45.2487	-44.7589	-43.9694	-43.2151	-42.0808	-42.7444	-41.4226	-40.876	-39.545	-39.3783	-40.0683
							1547.54	-43.9604	-44.97	-45.244	-45.6772	-45.9166	-45.9987	-45.8921	-45.2874	-44.8057	-44.007	-43.2656	-42.1196	-42.778	-41.4529	-40.9027	-39.5651	-39.3969	-40.0891
							1547.55	-43.9072	-44.9322	-45.2027	-45.6484	-45.9012	-46	-45.9084	-45.3253	-44.852	-44.0446	-43.3163	-42.1588	-42.8117	-41.4834	-40.9297	-39.5852	-39.4155	-40.1099
							1547.56	-43.8539	-44.894	-45.1607	-45.6186	-45.8845	-46	-45.9234	-45.3624	-44.8977	-44.0821	-43.3672	-42.1982	-42.8456	-41.5142	-40.9568	-39.6056	-39.4343	-40.1308
							1547.57	-43.8006	-44.8554	-45.1178	-45.5877	-45.8666	-45.9987	-45.9371	-45.3987	-44.9429	-44.1196	-43.4182	-42.238	-42.8795	-41.5451	-40.9841	-39.626	-39.4532	-40.1518
							1547.58	-43.7472	-44.8165	-45.0742	-45.5557	-45.8474	-45.996	-45.9495	-45.4341	-44.9874	-44.1571	-43.4694	-42.2781	-42.9135	-41.5762	-41.0115	-39.6466	-39.4722	-40.1729
							1547.58	-43.6938	-44.7772	-45.0298	-45.5226	-45.827	-45.992	-45.9605	-45.4687	-45.0313	-44.1945	-43.5207	-42.3185	-42.9477	-41.6075	-41.0391	-39.6673	-39.4913	-40.194
							1547.59	-43.6405	-44.7375	-44.9847	-45.4886	-45.8054	-45.9867	-45.9702	-45.5023	-45.0746	-44.2318	-43.5721	-42.3593	-42.9819	-41.639	-41.0668	-39.6881	-39.5106	-40.2153
							1547.6	-43.5871	-44.6975	-44.939	-45.4535	-45.7826	-45.98	-45.9785	-45.535	-45.1172	-44.269	-43.6236	-42.4003	-43.0162	-41.6707	-41.0948	-39.709	-39.5299	-40.2366
							1547.61	-43.5338	-44.6572	-44.8925	-45.4175	-45.7585	-45.9721	-45.9855	-45.5668	-45.1591	-44.3061	-43.6751	-42.4417	-43.0506	-41.7027	-41.1228	-39.7301	-39.5493	-40.2579
							1547.62	-43.4806	-44.6166	-44.8455	-45.3806	-45.7333	-45.9628	-45.9912	-45.5976	-45.2003	-44.3431	-43.7267	-42.4834	-43.0851	-41.7348	-41.1511	-39.7513	-39.5689	-40.2794
							1547.62	-43.4275	-44.5758	-44.7979	-45.3427	-45.707	-45.9522	-45.9954	-45.6274	-45.2407	-44.38	-43.7784	-42.5253	-43.1197	-41.7671	-41.1795	-39.7727	-39.5885	-40.3009
							1547.63	-43.3745	-44.5347	-44.7496	-45.3039	-45.6795	-45.9402	-45.9983	-45.6562	-45.2803	-44.4168	-43.8301	-42.5676	-43.1543	-41.7997	-41.2082	-39.7941	-39.6083	-40.3226
							1547.64	-43.3216	-44.4933	-44.7009	-45.2643	-45.6509	-45.927	-45.9999	-45.6839	-45.3191	-44.4534	-43.8817	-42.6102	-43.189	-41.8324	-41.2369	-39.8157	-39.6281	-40.3442
							1547.65	-43.2689	-44.4517	-44.6516	-45.2238	-45.6212	-45.9125	-46	-45.7106	-45.3571	-44.4899	-43.9333	-42.653	-43.2238	-41.8654	-41.2659	-39.8375	-39.6481	-40.366
							1547.66	-43.2164	-44.41	-44.6019	-45.1824	-45.5904	-45.8968	-45.9988	-45.7362	-45.3942	-44.5262	-43.9848	-42.6962	-43.2587	-41.8986	-41.295	-39.8593	-39.6682	-40.3879
							1547.66	-43.1641	-44.368	-44.5517	-45.1403	-45.5586	-45.8797	-45.9962	-45.7607	-45.4304	-44.5624	-44.0363	-42.7396	-43.2936	-41.932	-41.3244	-39.8813	-39.6884	-40.4098
							1547.67	-43.112	-44.3258	-44.5011	-45.0974	-45.5257	-45.8614	-45.9922	-45.7842	-45.4657	-44.5984	-44.0877	-42.7833	-43.3286	-41.9656	-41.3539	-39.9035	-39.7088	-40.4318
							1547.68	-43.0601	-44.2835	-44.45	-45.0538	-45.4918	-45.8418	-45.9868	-45.8064	-45.5	-44.6341	-44.1389	-42.8273	-43.3637	-41.9994	-41.3835	-39.9258	-39.7292	-40.4539
							1547.69	-43.0084	-44.2411	-44.3986	-45.0095	-45.4569	-45.821	-45.9801	-45.8276	-45.5334	-44.6697	-44.19	-42.8715	-43.3988	-42.0334	-41.4134	-39.9482	-39.7498	-40.476
							1547.7	-42.9571	-44.1985	-44.3469	-44.9644	-45.4211	-45.799	-45.972	-45.8476	-45.5658	-44.7051	-44.2409	-42.916	-43.434	-42.0677	-41.4435	-39.9707	-39.7705	-40.4983
							1547.7	-42.906	-44.1558	-44.2949	-44.9187	-45.3843	-45.7758	-45.9625	-45.8664	-45.5972	-44.7403	-44.2916	-42.9607	-43.4692	-42.1021	-41.4737	-39.9934	-39.7912	-40.5206
							1547.71	-42.8552	-44.113	-44.2426	-44.8724	-45.3466	-45.7514	-45.9517	-45.884	-45.6276	-44.7752	-44.342	-43.0057	-43.5045	-42.1368	-41.5041	-40.0163	-39.8122	-40.543
							1547.72	-42.8047	-44.0701	-44.19	-44.8255	-45.3079	-45.7259	-45.9396	-45.9004	-45.6569	-44.8099	-44.3922	-43.0509	-43.5398	-42.1717	-41.5348	-40.0393	-39.8332	-40.5655
							1547.73	-42.7545	-44.0271	-44.1372	-44.778	-45.2685	-45.6991	-45.9261	-45.9156	-45.6851	-44.8443	-44.4421	-43.0963	-43.5751	-42.2068	-41.5656	-40.0624	-39.8543	-40.588
							1547.74	-42.7046	-43.9841	-44.0842	-44.73	-45.2281	-45.6713	-45.9112	-45.9296	-45.7122	-44.8784	-44.4917	-43.142	-43.6105	-42.2421	-41.5966	-40.0857	-39.8756	-40.6107
							1547.74	-42.6551	-43.9411	-44.031	-44.6814	-45.187	-45.6423	-45.8951	-45.9423	-45.7382	-44.9123	-44.541	-43.1878	-43.6459	-42.2777	-41.6278	-40.1092	-39.897	-40.6334
							1547.75	-42.606	-43.898	-43.9777	-44.6324	-45.145	-45.6122	-45.8776	-45.9538	-45.7631	-44.9458	-44.5899	-43.2339	-43.6813	-42.3134	-41.6592	-40.1328	-39.9185	-40.6562
							1547.76	-42.5572	-43.8549	-43.9242	-44.5829	-45.1023	-45.5811	-45.8588	-45.9641	-45.7868	-44.9791	-44.6385	-43.2801	-43.7167	-42.3494	-41.6908	-40.1565	-39.9402	-40.6791
							1547.77	-42.5088	-43.8118	-43.8707	-44.533	-45.0589	-45.5489	-45.8388	-45.973	-45.8094	-45.012	-44.6866	-43.3265	-43.7522	-42.3856	-41.7226	-40.1804	-39.9619	-40.702
							1547.78	-42.4608	-43.7687	-43.8171	-44.4826	-45.0147	-45.5156	-45.8175	-45.9807	-45.8308	-45.0446	-44.7342	-43.3731	-43.7877	-42.4219	-41.7546	-40.2045	-39.9838	-40.725
							1547.78	-42.4131	-43.7256	-43.7634	-44.4319	-44.9699	-45.4814	-45.7949	-45.9872	-45.8509	-45.0769	-44.7814	-43.4198	-43.8231	-42.4585	-41.7868	-40.2287	-40.0058	-40.7482
							1547.79	-42.3659	-43.6826	-43.7097	-44.3809	-44.9244	-45.4461	-45.7711	-45.9923	-45.8698	-45.1088	-44.8281	-43.4666	-43.8586	-42.4953	-41.8192	-40.2531	-40.0279	-40.7713
							1547.8	-42.3191	-43.6396	-43.6561	-44.3295	-44.8783	-45.4099	-45.746	-45.9962	-45.8875	-45.1403	-44.8742	-43.5136	-43.894	-42.5324	-41.8518	-40.2777	-40.0502	-40.7946
							1547.81	-42.2727	-43.5966	-43.6024	-44.2778	-44.8315	-45.3728	-45.7198	-45.9987	-45.904	-45.1715	-44.9198	-43.5607	-43.9294	-42.5696	-41.8846	-40.3024	-40.0726	-40.818
							1547.82	-42.2267	-43.5537	-43.5488	-44.2259	-44.7842	-45.3347	-45.6923	-46	-45.9192	-45.2023	-44.9648	-43.6078	-43.9649	-42.607	-41.9177	-40.3273	-40.0951	-40.8414
							1547.82	-42.1812	-43.5109	-43.4953	-44.1737	-44.7364	-45.2958	-45.6637	-46	-45.9331	-45.2326	-45.0092	-43.6551	-44.0002	-42.6446	-41.9509	-40.3524	-40.1178	-40.8649
							1547.83	-42.1361	-43.4682	-43.4419	-44.1213	-44.6881	-45.2559	-45.6339	-45.9986	-45.9457	-45.2626	-45.053	-43.7024	-44.0356	-42.6824	-41.9843	-40.3777	-40.1405	-40.8885
							1547.84	-42.0914	-43.4256	-43.3886	-44.0687	-44.6392	-45.2153	-45.603	-45.996	-45.957	-45.2921	-45.0961	-43.7497	-44.0709	-42.7205	-42.018	-40.4031	-40.1634	-40.9122
							1547.85	-42.0471	-43.3831	-43.3354	-44.016	-44.5899	-45.1738	-45.571	-45.9921	-45.967	-45.3212	-45.1384	-43.7971	-44.1061	-42.7587	-42.0518	-40.4287	-40.1865	-40.9359
							1547.86	-42.0033	-43.3407	-43.2824	-43.9632	-44.5402	-45.1315	-45.538	-45.9869	-45.9757	-45.3498	-45.1801	-43.8445	-44.1413	-42.7971	-42.0859	-40.4546	-40.2096	-40.9598
							1547.86	-41.96	-43.2984	-43.2295	-43.9102	-44.49	-45.0885	-45.5038	-45.9804	-45.9831	-45.3779	-45.221	-43.8919	-44.1765	-42.8357	-42.1202	-40.4806	-40.233	-40.9837
							1547.87	-41.9171	-43.2563	-43.1769	-43.8571	-44.4395	-45.0447	-45.4686	-45.9726	-45.9892	-45.4056	-45.2612	-43.9393	-44.2115	-42.8744	-42.1546	-40.5068	-40.2564	-41.0077
							1547.88	-41.8747	-43.2143	-43.1245	-43.804	-44.3887	-45.0003	-45.4324	-45.9635	-45.9939	-45.4328	-45.3005	-43.9866	-44.2465	-42.9134	-42.1893	-40.5332	-40.28	-41.0317
							1547.89	-41.8327	-43.1725	-43.0723	-43.7509	-44.3375	-44.9551	-45.3952	-45.9532	-45.9973	-45.4595	-45.339	-44.0339	-44.2815	-42.9525	-42.2242	-40.5598	-40.3037	-41.0559
							1547.9	-41.7911	-43.1308	-43.0203	-43.6977	-44.286	-44.9093	-45.357	-45.9415	-45.9993	-45.4856	-45.3766	-44.0812	-44.3163	-42.9918	-42.2593	-40.5866	-40.3275	-41.0801
							1547.9	-41.7501	-43.0893	-42.9686	-43.6446	-44.2343	-44.8629	-45.3179	-45.9287	-46	-45.5113	-45.4134	-44.1283	-44.351	-43.0313	-42.2946	-40.6137	-40.3515	-41.1044
							1547.91	-41.7094	-43.0479	-42.9172	-43.5915	-44.1823	-44.8159	-45.2779	-45.9145	-45.9993	-45.5364	-45.4493	-44.1753	-44.3856	-43.0709	-42.3302	-40.6409	-40.3756	-41.1288
							1547.92	-41.6692	-43.0068	-42.8661	-43.5385	-44.1301	-44.7683	-45.237	-45.8991	-45.9973	-45.5609	-45.4842	-44.2222	-44.4201	-43.1107	-42.3659	-40.6684	-40.3999	-41.1533
							1547.93	-41.6295	-42.9658	-42.8153	-43.4855	-44.0777	-44.7202	-45.1952	-45.8825	-45.994	-45.5849	-45.5181	-44.269	-44.4545	-43.1506	-42.4018	-40.6961	-40.4243	-41.1778
							1547.94	-41.5902	-42.925	-42.7649	-43.4326	-44.0252	-44.6715	-45.1526	-45.8647	-45.9893	-45.6084	-45.5511	-44.3155	-44.4887	-43.1907	-42.438	-40.724	-40.4489	-41.2024
							1547.94	-41.5514	-42.8844	-42.7147	-43.3799	-43.9725	-44.6224	-45.1092	-45.8456	-45.9833	-45.6312	-45.5831	-44.3619	-44.5229	-43.2309	-42.4743	-40.7522	-40.4736	-41.2271
							1547.95	-41.513	-42.844	-42.6649	-43.3273	-43.9198	-44.5728	-45.0651	-45.8254	-45.9759	-45.6534	-45.614	-44.4081	-44.5568	-43.2713	-42.5109	-40.7806	-40.4984	-41.2519
							1547.96	-41.4751	-42.8038	-42.6155	-43.2749	-43.8669	-44.5228	-45.0201	-45.8039	-45.9672	-45.6751	-45.6439	-44.454	-44.5906	-43.3118	-42.5476	-40.8092	-40.5234	-41.2768
							1547.97	-41.4376	-42.7638	-42.5664	-43.2226	-43.814	-44.4724	-44.9745	-45.7813	-45.9571	-45.6961	-45.6727	-44.4997	-44.6243	-43.3524	-42.5846	-40.8381	-40.5485	-41.3017
							1547.98	-41.4005	-42.7241	-42.5178	-43.1706	-43.761	-44.4217	-44.9281	-45.7576	-45.9458	-45.7165	-45.7004	-44.5451	-44.6577	-43.3931	-42.6217	-40.8673	-40.5738	-41.3268
							1547.98	-41.3638	-42.6846	-42.4695	-43.1187	-43.7081	-44.3706	-44.8811	-45.7327	-45.9331	-45.7363	-45.7271	-44.5902	-44.691	-43.4339	-42.6591	-40.8967	-40.5993	-41.3518
							1547.99	-41.3276	-42.6452	-42.4216	-43.0671	-43.6551	-44.3191	-44.8335	-45.7066	-45.9191	-45.7554	-45.7525	-44.635	-44.7241	-43.4748	-42.6966	-40.9263	-40.6249	-41.377
							1548	-41.2918	-42.6062	-42.3741	-43.0158	-43.6022	-44.2674	-44.7853	-45.6795	-45.9038	-45.7738	-45.7768	-44.6795	-44.757	-43.5158	-42.7343	-40.9563	-40.6506	-41.4023
							1548.01	-41.2565	-42.5673	-42.3271	-42.9647	-43.5494	-44.2155	-44.7365	-45.6513	-45.8872	-45.7916	-45.8	-44.7236	-44.7897	-43.5569	-42.7722	-40.9865	-40.6765	-41.4276
							1548.02	-41.2215	-42.5287	-42.2804	-42.9139	-43.4966	-44.1633	-44.6871	-45.622	-45.8694	-45.8088	-45.8219	-44.7673	-44.8221	-43.5981	-42.8103	-41.0169	-40.7026	-41.453
							1548.02	-41.187	-42.4903	-42.2342	-42.8634	-43.4439	-44.1109	-44.6372	-45.5917	-45.8503	-45.8252	-45.8427	-44.8106	-44.8544	-43.6393	-42.8486	-41.0477	-40.7288	-41.4785
							1548.03	-41.1528	-42.4522	-42.1885	-42.8131	-43.3914	-44.0583	-44.5869	-45.5603	-45.8299	-45.8409	-45.8622	-44.8534	-44.8864	-43.6806	-42.8871	-41.0787	-40.7552	-41.5041
							1548.04	-41.1191	-42.4143	-42.1431	-42.7633	-43.3389	-44.0056	-44.5361	-45.528	-45.8083	-45.856	-45.8805	-44.8959	-44.9181	-43.7219	-42.9257	-41.1101	-40.7817	-41.5297
							1548.05	-41.0857	-42.3766	-42.0982	-42.7137	-43.2867	-43.9527	-44.4849	-45.4946	-45.7855	-45.8703	-45.8975	-44.9378	-44.9496	-43.7632	-42.9645	-41.1417	-40.8084	-41.5554
							1548.06	-41.0528	-42.3392	-42.0538	-42.6645	-43.2346	-43.8997	-44.4332	-45.4603	-45.7615	-45.8839	-45.9133	-44.9792	-44.9808	-43.8046	-43.0035	-41.1736	-40.8353	-41.5812
							1548.06	-41.0202	-42.302	-42.0098	-42.6157	-43.1827	-43.8467	-44.3812	-45.425	-45.7362	-45.8968	-45.9278	-45.0202	-45.0117	-43.846	-43.0426	-41.2059	-40.8623	-41.6071
							1548.07	-40.988	-42.2651	-41.9663	-42.5672	-43.1311	-43.7936	-44.3289	-45.3889	-45.7098	-45.909	-45.9409	-45.0605	-45.0424	-43.8874	-43.0819	-41.2384	-40.8895	-41.633
							1548.08	-40.9561	-42.2284	-41.9233	-42.5191	-43.0796	-43.7405	-44.2763	-45.3518	-45.6823	-45.9204	-45.9528	-45.1003	-45.0727	-43.9288	-43.1214	-41.2713	-40.9169	-41.659
							1548.09	-40.9246	-42.192	-41.8807	-42.4714	-43.0284	-43.6873	-44.2234	-45.3138	-45.6536	-45.9311	-45.9634	-45.1396	-45.1028	-43.9702	-43.1609	-41.3045	-40.9444	-41.6851
							1548.1	-40.8935	-42.1558	-41.8385	-42.424	-42.9775	-43.6342	-44.1702	-45.2751	-45.6238	-45.9411	-45.9727	-45.1782	-45.1325	-44.0115	-43.2007	-41.338	-40.9721	-41.7113
							1548.1	-40.8627	-42.1199	-41.7968	-42.3771	-42.9268	-43.5812	-44.1168	-45.2354	-45.5929	-45.9503	-45.9806	-45.2161	-45.1619	-44.0528	-43.2405	-41.3719	-41	-41.7375
							1548.11	-40.8323	-42.0842	-41.7556	-42.3306	-42.8765	-43.5282	-44.0632	-45.195	-45.5609	-45.9587	-45.9872	-45.2535	-45.1909	-44.094	-43.2805	-41.406	-41.0281	-41.7638
							1548.12	-40.8021	-42.0488	-41.7149	-42.2845	-42.8264	-43.4753	-44.0095	-45.1539	-45.5279	-45.9663	-45.9924	-45.2901	-45.2196	-44.1352	-43.3207	-41.4406	-41.0564	-41.7902
							1548.13	-40.7724	-42.0136	-41.6746	-42.2388	-42.7767	-43.4224	-43.9556	-45.1119	-45.4938	-45.9732	-45.9963	-45.326	-45.248	-44.1763	-43.3609	-41.4754	-41.0848	-41.8167
							1548.14	-40.7429	-41.9787	-41.6348	-42.1936	-42.7273	-43.3698	-43.9016	-45.0693	-45.4588	-45.9793	-45.9988	-45.3613	-45.2759	-44.2173	-43.4012	-41.5106	-41.1134	-41.8432
							1548.14	-40.7138	-41.944	-41.5954	-42.1488	-42.6782	-43.3172	-43.8475	-45.026	-45.4227	-45.9846	-46	-45.3957	-45.3035	-44.2582	-43.4417	-41.5462	-41.1422	-41.8698
							1548.15	-40.6849	-41.9096	-41.5565	-42.1044	-42.6295	-43.2649	-43.7934	-44.982	-45.3857	-45.9892	-45.9998	-45.4294	-45.3307	-44.299	-43.4822	-41.5821	-41.1712	-41.8965
							1548.16	-40.6564	-41.8754	-41.518	-42.0605	-42.5812	-43.2127	-43.7392	-44.9373	-45.3477	-45.9929	-45.9983	-45.4624	-45.3575	-44.3397	-43.5228	-41.6184	-41.2004	-41.9232
							1548.17	-40.6281	-41.8415	-41.48	-42.017	-42.5332	-43.1607	-43.685	-44.8921	-45.3089	-45.9959	-45.9954	-45.4945	-45.3839	-44.3802	-43.5635	-41.655	-41.2298	-41.9501
							1548.18	-40.6002	-41.8078	-41.4425	-41.974	-42.4856	-43.1089	-43.6308	-44.8462	-45.2691	-45.9981	-45.9911	-45.5258	-45.4099	-44.4205	-43.6043	-41.692	-41.2593	-41.9769
							1548.18	-40.5725	-41.7743	-41.4053	-41.9314	-42.4384	-43.0574	-43.5767	-44.7999	-45.2285	-45.9994	-45.9855	-45.5562	-45.4354	-44.4607	-43.6452	-41.7294	-41.2891	-42.0039
							1548.19	-40.5451	-41.7411	-41.3687	-41.8892	-42.3916	-43.0061	-43.5226	-44.7529	-45.1871	-46	-45.9786	-45.5858	-45.4605	-44.5007	-43.686	-41.7671	-41.3191	-42.0309
							1548.2	-40.518	-41.7082	-41.3324	-41.8475	-42.3452	-42.9551	-43.4686	-44.7055	-45.1448	-45.9998	-45.9702	-45.6145	-45.4852	-44.5405	-43.727	-41.8052	-41.3492	-42.058
							1548.21	-40.4911	-41.6754	-41.2966	-41.8063	-42.2992	-42.9044	-43.4147	-44.6576	-45.1018	-45.9988	-45.9606	-45.6423	-45.5093	-44.5801	-43.7679	-41.8437	-41.3796	-42.0852
							1548.22	-40.4645	-41.643	-41.2613	-41.7655	-42.2537	-42.8539	-43.361	-44.6092	-45.0581	-45.9969	-45.9496	-45.6691	-45.533	-44.6194	-43.8089	-41.8825	-41.4102	-42.1124
							1548.22	-40.4381	-41.6107	-41.2263	-41.7252	-42.2086	-42.8038	-43.3074	-44.5605	-45.0136	-45.9943	-45.9373	-45.6951	-45.5563	-44.6585	-43.8499	-41.9217	-41.441	-42.1397
							1548.23	-40.412	-41.5787	-41.1918	-41.6853	-42.1639	-42.754	-43.254	-44.5113	-44.9684	-45.9909	-45.9236	-45.72	-45.579	-44.6973	-43.8909	-41.9613	-41.4719	-42.167
							1548.24	-40.3861	-41.5469	-41.1577	-41.6459	-42.1196	-42.7046	-43.2007	-44.4618	-44.9225	-45.9867	-45.9086	-45.744	-45.6012	-44.7359	-43.9319	-42.0013	-41.5031	-42.1944
							1548.25	-40.3604	-41.5154	-41.1239	-41.6069	-42.0757	-42.6555	-43.1477	-44.4119	-44.876	-45.9817	-45.8924	-45.767	-45.623	-44.7742	-43.9729	-42.0417	-41.5345	-42.2219
							1548.26	-40.335	-41.4841	-41.0906	-41.5683	-42.0323	-42.6067	-43.0949	-44.3617	-44.8289	-45.9758	-45.8748	-45.789	-45.6442	-44.8121	-44.0139	-42.0824	-41.5662	-42.2495
							1548.26	-40.3098	-41.453	-41.0577	-41.5302	-41.9894	-42.5583	-43.0423	-44.3112	-44.7812	-45.9692	-45.8559	-45.81	-45.6648	-44.8498	-44.0548	-42.1235	-41.598	-42.2771
							1548.27	-40.2848	-41.4221	-41.0252	-41.4926	-41.9469	-42.5103	-42.99	-44.2604	-44.733	-45.9618	-45.8358	-45.83	-45.685	-44.8871	-44.0956	-42.165	-41.6301	-42.3047
							1548.28	-40.26	-41.3915	-40.993	-41.4554	-41.9048	-42.4627	-42.938	-44.2095	-44.6842	-45.9536	-45.8144	-45.8489	-45.7045	-44.924	-44.1364	-42.2069	-41.6623	-42.3325
							1548.29	-40.2354	-41.3611	-40.9612	-41.4186	-41.8632	-42.4155	-42.8863	-44.1583	-44.6349	-45.9447	-45.7918	-45.8667	-45.7236	-44.9606	-44.1771	-42.2491	-41.6948	-42.3602
							1548.3	-40.211	-41.3309	-40.9298	-41.3822	-41.8221	-42.3687	-42.8349	-44.1069	-44.5852	-45.9349	-45.768	-45.8835	-45.742	-44.9968	-44.2178	-42.2917	-41.7276	-42.3881
							1548.3	-40.1868	-41.3009	-40.8988	-41.3463	-41.7813	-42.3223	-42.7838	-44.0554	-44.535	-45.9244	-45.7429	-45.8991	-45.7599	-45.0326	-44.2583	-42.3347	-41.7605	-42.416
							1548.31	-40.1628	-41.2711	-40.8681	-41.3108	-41.7411	-42.2763	-42.7331	-44.0037	-44.4844	-45.913	-45.7167	-45.9137	-45.7772	-45.0679	-44.2987	-42.3781	-41.7937	-42.4439
							1548.32	-40.139	-41.2415	-40.8378	-41.2757	-41.7013	-42.2307	-42.6827	-43.9519	-44.4335	-45.901	-45.6893	-45.9272	-45.7939	-45.1029	-44.339	-42.4218	-41.8271	-42.472
							1548.33	-40.1154	-41.2122	-40.8078	-41.241	-41.6619	-42.1856	-42.6327	-43.9	-44.3822	-45.8881	-45.6607	-45.9395	-45.8101	-45.1374	-44.3792	-42.4659	-41.8607	-42.5
							1548.34	-40.0919	-41.183	-40.7781	-41.2067	-41.623	-42.1409	-42.583	-43.8481	-44.3305	-45.8745	-45.631	-45.9508	-45.8256	-45.1714	-44.4191	-42.5103	-41.8946	-42.5281
							1548.34	-40.0686	-41.1541	-40.7487	-41.1729	-41.5845	-42.0967	-42.5338	-43.7961	-44.2786	-45.8601	-45.6001	-45.9609	-45.8405	-45.2049	-44.459	-42.5551	-41.9286	-42.5563
							1548.35	-40.0455	-41.1253	-40.7197	-41.1394	-41.5464	-42.0528	-42.4849	-43.7442	-44.2264	-45.845	-45.5682	-45.9698	-45.8547	-45.238	-44.4986	-42.6002	-41.963	-42.5845
							1548.36	-40.0225	-41.0968	-40.691	-41.1063	-41.5088	-42.0095	-42.4364	-43.6922	-44.174	-45.8291	-45.5352	-45.9776	-45.8684	-45.2705	-44.5381	-42.6457	-41.9975	-42.6128
							1548.37	-39.9997	-41.0685	-40.6626	-41.0736	-41.4716	-41.9665	-42.3884	-43.6402	-44.1213	-45.8125	-45.5012	-45.9843	-45.8814	-45.3026	-44.5773	-42.6914	-42.0323	-42.6411
							1548.38	-39.9771	-41.0403	-40.6345	-41.0413	-41.4349	-41.9241	-42.3408	-43.5883	-44.0685	-45.7952	-45.4661	-45.9897	-45.8937	-45.334	-44.6163	-42.7376	-42.0673	-42.6695
							1548.38	-39.9546	-41.0123	-40.6067	-41.0093	-41.3986	-41.882	-42.2936	-43.5365	-44.0155	-45.7772	-45.43	-45.9941	-45.9054	-45.3649	-44.6551	-42.784	-42.1026	-42.6979
							1548.39	-39.9323	-40.9846	-40.5792	-40.9777	-41.3627	-41.8405	-42.2469	-43.4847	-43.9623	-45.7584	-45.3929	-45.9972	-45.9165	-45.3953	-44.6936	-42.8307	-42.1381	-42.7264
							1548.4	-39.9101	-40.957	-40.552	-40.9465	-41.3272	-41.7993	-42.2006	-43.4331	-43.9091	-45.739	-45.3549	-45.9992	-45.9269	-45.425	-44.7318	-42.8778	-42.1738	-42.7549
							1548.41	-39.888	-40.9296	-40.525	-40.9156	-41.2921	-41.7587	-42.1548	-43.3816	-43.8558	-45.7188	-45.316	-46	-45.9366	-45.4542	-44.7698	-42.9251	-42.2098	-42.7834
							1548.42	-39.8661	-40.9024	-40.4983	-40.8851	-41.2575	-41.7184	-42.1094	-43.3302	-43.8024	-45.698	-45.2761	-45.9996	-45.9457	-45.4827	-44.8075	-42.9728	-42.246	-42.812
							1548.42	-39.8443	-40.8754	-40.4719	-40.8549	-41.2232	-41.6787	-42.0645	-43.279	-43.749	-45.6764	-45.2354	-45.9981	-45.954	-45.5106	-44.8448	-43.0206	-42.2824	-42.8406
							1548.43	-39.8227	-40.8485	-40.4457	-40.825	-41.1893	-41.6393	-42.02	-43.228	-43.6956	-45.6543	-45.1938	-45.9954	-45.9617	-45.5379	-44.8819	-43.0688	-42.3191	-42.8693
							1548.44	-39.8012	-40.8218	-40.4197	-40.7955	-41.1559	-41.6005	-41.976	-43.1772	-43.6421	-45.6314	-45.1514	-45.9915	-45.9687	-45.5645	-44.9185	-43.1172	-42.356	-42.898
							1548.45	-39.7798	-40.7953	-40.394	-40.7663	-41.1228	-41.562	-41.9325	-43.1266	-43.5888	-45.6079	-45.1082	-45.9864	-45.975	-45.5904	-44.9549	-43.1658	-42.3931	-42.9267
							1548.46	-39.7586	-40.769	-40.3685	-40.7374	-41.0901	-41.5241	-41.8895	-43.0762	-43.5355	-45.5838	-45.0642	-45.9802	-45.9806	-45.6156	-44.9908	-43.2147	-42.4305	-42.9555
							1548.46	-39.7375	-40.7429	-40.3433	-40.7088	-41.0578	-41.4865	-41.8469	-43.0261	-43.4823	-45.559	-45.0195	-45.9728	-45.9855	-45.6402	-45.0263	-43.2637	-42.4681	-42.9843
							1548.47	-39.7165	-40.7169	-40.3183	-40.6805	-41.0258	-41.4494	-41.8048	-42.9763	-43.4291	-45.5336	-44.974	-45.9642	-45.9897	-45.664	-45.0615	-43.313	-42.5059	-43.0132
							1548.48	-39.6956	-40.691	-40.2935	-40.6524	-40.9942	-41.4127	-41.7632	-42.9267	-43.3761	-45.5077	-44.9279	-45.9545	-45.9932	-45.6871	-45.0962	-43.3625	-42.5439	-43.042
							1548.49	-39.6749	-40.6654	-40.2689	-40.6247	-40.963	-41.3765	-41.7221	-42.8774	-43.3233	-45.4811	-44.8812	-45.9436	-45.996	-45.7095	-45.1305	-43.4121	-42.5822	-43.0709
							1548.5	-39.6543	-40.6399	-40.2445	-40.5973	-40.9321	-41.3406	-41.6814	-42.8284	-43.2706	-45.4539	-44.8338	-45.9316	-45.998	-45.7311	-45.1643	-43.4618	-42.6207	-43.0998
							1548.5	-39.6338	-40.6146	-40.2203	-40.5701	-40.9016	-41.3052	-41.6412	-42.7797	-43.2181	-45.4262	-44.7858	-45.9184	-45.9994	-45.7519	-45.1977	-43.5117	-42.6594	-43.1288
							1548.51	-39.6134	-40.5894	-40.1964	-40.5432	-40.8714	-41.2702	-41.6015	-42.7313	-43.1658	-45.3979	-44.7372	-45.9042	-46	-45.772	-45.2306	-43.5617	-42.6984	-43.1577
							1548.52	-39.5932	-40.5644	-40.1726	-40.5165	-40.8415	-41.2357	-41.5622	-42.6833	-43.1138	-45.369	-44.6881	-45.8888	-45.9999	-45.7913	-45.263	-43.6119	-42.7375	-43.1867
							1548.53	-39.573	-40.5395	-40.149	-40.4902	-40.8119	-41.2015	-41.5235	-42.6356	-43.0619	-45.3397	-44.6385	-45.8723	-45.9991	-45.8098	-45.2949	-43.6621	-42.7769	-43.2157
							1548.54	-39.553	-40.5148	-40.1255	-40.464	-40.7827	-41.1677	-41.4852	-42.5883	-43.0103	-45.3098	-44.5884	-45.8546	-45.9976	-45.8275	-45.3262	-43.7123	-42.8165	-43.2447
							1548.54	-39.5331	-40.4902	-40.1023	-40.4381	-40.7538	-41.1343	-41.4473	-42.5414	-42.959	-45.2794	-44.5378	-45.8359	-45.9953	-45.8443	-45.357	-43.7626	-42.8563	-43.2737
							1548.55	-39.5133	-40.4658	-40.0792	-40.4124	-40.7251	-41.1013	-41.4099	-42.4948	-42.908	-45.2485	-44.4868	-45.8162	-45.9923	-45.8604	-45.3872	-43.813	-42.8962	-43.3028
							1548.56	-39.4936	-40.4416	-40.0563	-40.387	-40.6968	-41.0687	-41.373	-42.4486	-42.8573	-45.2171	-44.4355	-45.7953	-45.9886	-45.8756	-45.4169	-43.8633	-42.9364	-43.3318
							1548.57	-39.474	-40.4175	-40.0335	-40.3618	-40.6688	-41.0365	-41.3365	-42.4028	-42.8069	-45.1852	-44.3837	-45.7734	-45.9842	-45.89	-45.446	-43.9136	-42.9768	-43.3609
							1548.58	-39.4545	-40.3935	-40.011	-40.3368	-40.641	-41.0046	-41.3005	-42.3573	-42.7568	-45.1529	-44.3317	-45.7505	-45.979	-45.9035	-45.4745	-43.9639	-43.0173	-43.39
							1548.58	-39.4352	-40.3697	-39.9885	-40.312	-40.6136	-40.9731	-41.2649	-42.3123	-42.7071	-45.1201	-44.2793	-45.7266	-45.9731	-45.9161	-45.5023	-44.0141	-43.058	-43.419
							1548.59	-39.4159	-40.346	-39.9663	-40.2874	-40.5864	-40.942	-41.2297	-42.2677	-42.6577	-45.0869	-44.2266	-45.7016	-45.9665	-45.9279	-45.5296	-44.0643	-43.0989	-43.4481
							1548.6	-39.3968	-40.3225	-39.9441	-40.263	-40.5594	-40.9112	-41.195	-42.2235	-42.6087	-45.0533	-44.1737	-45.6756	-45.9592	-45.9388	-45.5561	-44.1143	-43.14	-43.4772
							1548.61	-39.3778	-40.2991	-39.9222	-40.2388	-40.5327	-40.8807	-41.1607	-42.1797	-42.56	-45.0193	-44.1206	-45.6487	-45.9512	-45.9489	-45.5821	-44.1642	-43.1812	-43.5062
							1548.62	-39.3589	-40.2758	-39.9003	-40.2148	-40.5063	-40.8506	-41.1268	-42.1363	-42.5118	-44.9848	-44.0672	-45.6208	-45.9424	-45.958	-45.6073	-44.214	-43.2226	-43.5353
							1548.62	-39.3401	-40.2527	-39.8786	-40.191	-40.4801	-40.8209	-41.0934	-42.0933	-42.4639	-44.95	-44.0137	-45.592	-45.9329	-45.9663	-45.6319	-44.2636	-43.2642	-43.5643
							1548.63	-39.3214	-40.2297	-39.8571	-40.1674	-40.4542	-40.7914	-41.0603	-42.0508	-42.4165	-44.9149	-43.9601	-45.5623	-45.9228	-45.9737	-45.6558	-44.313	-43.3058	-43.5934
							1548.64	-39.3028	-40.2069	-39.8357	-40.144	-40.4285	-40.7623	-41.0276	-42.0087	-42.3694	-44.8794	-43.9064	-45.5316	-45.9119	-45.9802	-45.679	-44.3622	-43.3476	-43.6224
							1548.65	-39.2843	-40.1842	-39.8144	-40.1207	-40.403	-40.7334	-40.9954	-41.967	-42.3228	-44.8435	-43.8525	-45.5001	-45.9003	-45.9857	-45.7014	-44.4111	-43.3896	-43.6514
							1548.66	-39.2659	-40.1616	-39.7933	-40.0976	-40.3777	-40.7049	-40.9635	-41.9257	-42.2766	-44.8073	-43.7986	-45.4676	-45.888	-45.9904	-45.7231	-44.4598	-43.4316	-43.6804
							1548.66	-39.2476	-40.1391	-39.7722	-40.0747	-40.3527	-40.6767	-40.932	-41.8849	-42.2308	-44.7709	-43.7447	-45.4344	-45.875	-45.9941	-45.7441	-44.5082	-43.4738	-43.7094
							1548.67	-39.2295	-40.1168	-39.7513	-40.0519	-40.3279	-40.6487	-40.9009	-41.8445	-42.1855	-44.7341	-43.6907	-45.4003	-45.8614	-45.997	-45.7643	-44.5562	-43.5161	-43.7384
							1548.68	-39.2114	-40.0946	-39.7306	-40.0293	-40.3032	-40.6211	-40.8701	-41.8045	-42.1406	-44.697	-43.6368	-45.3654	-45.847	-45.9989	-45.7837	-44.604	-43.5584	-43.7673
							1548.69	-39.1935	-40.0726	-39.7099	-40.0069	-40.2788	-40.5937	-40.8397	-41.765	-42.0961	-44.6597	-43.5828	-45.3297	-45.832	-45.9999	-45.8024	-44.6513	-43.6008	-43.7962
							1548.7	-39.1756	-40.0506	-39.6894	-39.9846	-40.2546	-40.5666	-40.8097	-41.7259	-42.0521	-44.6221	-43.529	-45.2933	-45.8163	-46	-45.8203	-44.6982	-43.6433	-43.8251
							1548.7	-39.1579	-40.0288	-39.669	-39.9624	-40.2305	-40.5398	-40.78	-41.6872	-42.0086	-44.5842	-43.4752	-45.2561	-45.7999	-45.9992	-45.8373	-44.7447	-43.6859	-43.8539
							1548.71	-39.1403	-40.0072	-39.6487	-39.9404	-40.2067	-40.5132	-40.7506	-41.6489	-41.9655	-44.5462	-43.4215	-45.2182	-45.7829	-45.9974	-45.8536	-44.7908	-43.7285	-43.8827
							1548.72	-39.1227	-39.9856	-39.6286	-39.9186	-40.183	-40.4869	-40.7216	-41.6111	-41.9228	-44.5079	-43.368	-45.1796	-45.7652	-45.9948	-45.869	-44.8364	-43.7712	-43.9115
							1548.73	-39.1053	-39.9642	-39.6085	-39.8969	-40.1595	-40.4608	-40.6929	-41.5737	-41.8806	-44.4694	-43.3146	-45.1404	-45.7469	-45.9912	-45.8837	-44.8815	-43.8139	-43.9402
							1548.74	-39.088	-39.9429	-39.5886	-39.8753	-40.1362	-40.4349	-40.6645	-41.5367	-41.8389	-44.4307	-43.2614	-45.1005	-45.7279	-45.9867	-45.8975	-44.926	-43.8566	-43.9689
							1548.74	-39.0708	-39.9217	-39.5688	-39.8538	-40.1131	-40.4093	-40.6364	-41.5001	-41.7977	-44.3918	-43.2083	-45.0599	-45.7082	-45.9813	-45.9104	-44.97	-43.8993	-43.9975
							1548.75	-39.0537	-39.9006	-39.5491	-39.8325	-40.0901	-40.384	-40.6086	-41.4639	-41.7569	-44.3528	-43.1555	-45.0187	-45.688	-45.975	-45.9225	-45.0134	-43.9419	-44.0261
							1548.76	-39.0367	-39.8797	-39.5295	-39.8114	-40.0673	-40.3588	-40.5811	-41.4281	-41.7165	-44.3136	-43.1028	-44.977	-45.6671	-45.9678	-45.9337	-45.0563	-43.9846	-44.0546
							1548.77	-39.0198	-39.8589	-39.51	-39.7903	-40.0446	-40.3339	-40.5539	-41.3928	-41.6766	-44.2743	-43.0504	-44.9347	-45.6457	-45.9597	-45.9441	-45.0984	-44.0273	-44.0831
							1548.78	-39.003	-39.8382	-39.4906	-39.7694	-40.0221	-40.3091	-40.527	-41.3578	-41.6372	-44.2348	-42.9983	-44.8919	-45.6236	-45.9507	-45.9536	-45.1399	-44.0698	-44.1115
							1548.78	-38.9863	-39.8176	-39.4714	-39.7486	-39.9998	-40.2846	-40.5004	-41.3232	-41.5983	-44.1952	-42.9465	-44.8485	-45.6009	-45.9408	-45.9623	-45.1807	-44.1124	-44.1399
							1548.79	-38.9697	-39.7971	-39.4522	-39.7279	-39.9776	-40.2603	-40.474	-41.289	-41.5597	-44.1556	-42.8949	-44.8047	-45.5776	-45.93	-45.97	-45.2208	-44.1548	-44.1681
							1548.8	-38.9532	-39.7767	-39.4332	-39.7074	-39.9556	-40.2362	-40.4478	-41.2552	-41.5217	-44.1158	-42.8436	-44.7604	-45.5538	-45.9184	-45.9769	-45.2602	-44.1972	-44.1963
							1548.81	-38.9368	-39.7565	-39.4143	-39.6869	-39.9336	-40.2122	-40.422	-41.2218	-41.4841	-44.0759	-42.7927	-44.7157	-45.5294	-45.9058	-45.9829	-45.2988	-44.2395	-44.2245
							1548.82	-38.9205	-39.7364	-39.3955	-39.6666	-39.9119	-40.1885	-40.3963	-41.1887	-41.4469	-44.036	-42.7421	-44.6705	-45.5044	-45.8924	-45.988	-45.3366	-44.2816	-44.2525
							1548.82	-38.9043	-39.7164	-39.3768	-39.6464	-39.8902	-40.1649	-40.371	-41.156	-41.4102	-43.996	-42.6918	-44.6249	-45.4789	-45.8782	-45.9922	-45.3736	-44.3236	-44.2805
							1548.83	-38.8882	-39.6965	-39.3581	-39.6264	-39.8687	-40.1415	-40.3458	-41.1237	-41.3739	-43.956	-42.642	-44.579	-45.4528	-45.8631	-45.9955	-45.4097	-44.3655	-44.3084
							1548.84	-38.8723	-39.6767	-39.3397	-39.6064	-39.8474	-40.1183	-40.3209	-41.0918	-41.338	-43.9159	-42.5924	-44.5328	-45.4262	-45.8471	-45.9979	-45.445	-44.4072	-44.3362
							1548.85	-38.8564	-39.657	-39.3213	-39.5866	-39.8262	-40.0953	-40.2962	-41.0601	-41.3026	-43.8758	-42.5433	-44.4862	-45.3991	-45.8303	-45.9994	-45.4793	-44.4488	-44.3639
							1548.86	-38.8406	-39.6375	-39.303	-39.5668	-39.8051	-40.0724	-40.2717	-41.0289	-41.2675	-43.8357	-42.4945	-44.4393	-45.3715	-45.8127	-46	-45.5128	-44.4901	-44.3915
							1548.86	-38.8249	-39.618	-39.2848	-39.5472	-39.7841	-40.0497	-40.2474	-40.998	-41.2329	-43.7956	-42.4462	-44.3921	-45.3434	-45.7943	-45.9997	-45.5453	-44.5312	-44.419
							1548.87	-38.8093	-39.5987	-39.2667	-39.5277	-39.7632	-40.0271	-40.2233	-40.9674	-41.1988	-43.7555	-42.3982	-44.3447	-45.3148	-45.775	-45.9985	-45.5769	-44.5721	-44.4465
							1548.88	-38.7938	-39.5794	-39.2488	-39.5083	-39.7425	-40.0047	-40.1995	-40.9371	-41.165	-43.7154	-42.3507	-44.297	-45.2857	-45.755	-45.9964	-45.6075	-44.6128	-44.4738
							1548.89	-38.7784	-39.5603	-39.2309	-39.489	-39.7219	-39.9824	-40.1758	-40.9071	-41.1316	-43.6753	-42.3036	-44.2491	-45.2562	-45.7342	-45.9934	-45.6371	-44.6532	-44.501
							1548.9	-38.763	-39.5413	-39.2132	-39.4699	-39.7014	-39.9603	-40.1523	-40.8775	-41.0986	-43.6352	-42.257	-44.2011	-45.2262	-45.7126	-45.9895	-45.6656	-44.6933	-44.5281
							1548.9	-38.7478	-39.5224	-39.1955	-39.4508	-39.6811	-39.9384	-40.129	-40.8482	-41.066	-43.5952	-42.2108	-44.1529	-45.1957	-45.6903	-45.9847	-45.6931	-44.7331	-44.555
							1548.91	-38.7327	-39.5036	-39.178	-39.4319	-39.6608	-39.9166	-40.1058	-40.8192	-41.0338	-43.5552	-42.165	-44.1045	-45.1649	-45.6671	-45.979	-45.7195	-44.7727	-44.5819
							1548.92	-38.7176	-39.4849	-39.1606	-39.413	-39.6407	-39.8949	-40.0829	-40.7905	-41.002	-43.5153	-42.1197	-44.056	-45.1336	-45.6433	-45.9724	-45.7449	-44.8119	-44.6086
							1548.93	-38.7027	-39.4663	-39.1432	-39.3943	-39.6207	-39.8733	-40.0601	-40.762	-40.9705	-43.4755	-42.0748	-44.0074	-45.1019	-45.6187	-45.9649	-45.7691	-44.8507	-44.6352
							1548.94	-38.6878	-39.4478	-39.126	-39.3757	-39.6008	-39.8519	-40.0375	-40.7339	-40.9394	-43.4357	-42.0304	-43.9587	-45.0698	-45.5935	-45.9565	-45.7922	-44.8892	-44.6617
							1548.94	-38.6731	-39.4294	-39.1089	-39.3572	-39.581	-39.8307	-40.015	-40.706	-40.9087	-43.396	-41.9865	-43.91	-45.0373	-45.5675	-45.9473	-45.8142	-44.9273	-44.688
							1548.95	-38.6584	-39.4111	-39.0919	-39.3388	-39.5613	-39.8095	-39.9927	-40.6784	-40.8783	-43.3565	-41.943	-43.8612	-45.0044	-45.5408	-45.9371	-45.835	-44.9651	-44.7142
							1548.96	-38.6438	-39.3929	-39.075	-39.3205	-39.5418	-39.7885	-39.9706	-40.6511	-40.8482	-43.317	-41.9	-43.8124	-44.9712	-45.5135	-45.9262	-45.8547	-45.0024	-44.7403
							1548.97	-38.6293	-39.3748	-39.0582	-39.3023	-39.5223	-39.7676	-39.9486	-40.624	-40.8185	-43.2776	-41.8575	-43.7636	-44.9376	-45.4855	-45.9143	-45.8731	-45.0393	-44.7661
							1548.98	-38.6149	-39.3569	-39.0415	-39.2842	-39.503	-39.7469	-39.9267	-40.5972	-40.7891	-43.2383	-41.8154	-43.7148	-44.9037	-45.4568	-45.9016	-45.8904	-45.0757	-44.7919
							1548.98	-38.6005	-39.339	-39.0249	-39.2662	-39.4838	-39.7262	-39.905	-40.5706	-40.7601	-43.1991	-41.7738	-43.666	-44.8694	-45.4276	-45.888	-45.9064	-45.1117	-44.8175
							1548.99	-38.5863	-39.3212	-39.0084	-39.2484	-39.4647	-39.7057	-39.8834	-40.5443	-40.7313	-43.1601	-41.7327	-43.6173	-44.8349	-45.3977	-45.8736	-45.9212	-45.1472	-44.8429
							1549	-38.5721	-39.3035	-38.992	-39.2306	-39.4457	-39.6853	-39.862	-40.5182	-40.7029	-43.1211	-41.6921	-43.5687	-44.8	-45.3672	-45.8584	-45.9348	-45.1822	-44.8682
							1549.01	-38.558	-39.2859	-38.9757	-39.2129	-39.4268	-39.6651	-39.8407	-40.4923	-40.6747	-43.0824	-41.6519	-43.5201	-44.7648	-45.3361	-45.8423	-45.9471	-45.2166	-44.8933
							1549.02	-38.544	-39.2684	-38.9595	-39.1954	-39.408	-39.6449	-39.8196	-40.4667	-40.6469	-43.0437	-41.6122	-43.4717	-44.7294	-45.3045	-45.8254	-45.9581	-45.2506	-44.9182
							1549.02	-38.5301	-39.251	-38.9434	-39.1779	-39.3893	-39.6249	-39.7985	-40.4413	-40.6193	-43.0052	-41.573	-43.4234	-44.6937	-45.2723	-45.8077	-45.9679	-45.2839	-44.9429
							1549.03	-38.5162	-39.2337	-38.9274	-39.1606	-39.3708	-39.6049	-39.7776	-40.4161	-40.5921	-42.9669	-41.5342	-43.3752	-44.6577	-45.2396	-45.7892	-45.9764	-45.3168	-44.9675
							1549.04	-38.5024	-39.2165	-38.9115	-39.1433	-39.3523	-39.5851	-39.7569	-40.3911	-40.5651	-42.9287	-41.4959	-43.3271	-44.6215	-45.2063	-45.7699	-45.9836	-45.349	-44.9918
							1549.05	-38.4887	-39.1993	-38.8957	-39.1262	-39.334	-39.5654	-39.7362	-40.3663	-40.5383	-42.8907	-41.458	-43.2792	-44.5851	-45.1725	-45.7498	-45.9895	-45.3806	-45.016
							1549.06	-38.4751	-39.1823	-38.88	-39.1092	-39.3157	-39.5458	-39.7157	-40.3417	-40.5119	-42.8528	-41.4207	-43.2315	-44.5484	-45.1383	-45.7289	-45.9941	-45.4116	-45.04
							1549.06	-38.4616	-39.1654	-38.8644	-39.0923	-39.2976	-39.5264	-39.6953	-40.3173	-40.4856	-42.8151	-41.3837	-43.184	-44.5115	-45.1036	-45.7073	-45.9974	-45.442	-45.0638
							1549.07	-38.4481	-39.1485	-38.8489	-39.0754	-39.2796	-39.507	-39.675	-40.2931	-40.4597	-42.7776	-41.3472	-43.1367	-44.4744	-45.0684	-45.685	-45.9993	-45.4718	-45.0874
							1549.08	-38.4347	-39.1317	-38.8335	-39.0587	-39.2616	-39.4878	-39.6548	-40.2691	-40.4339	-42.7402	-41.3112	-43.0896	-44.4372	-45.0328	-45.6619	-46	-45.5008	-45.1108
							1549.09	-38.4214	-39.1151	-38.8182	-39.0421	-39.2438	-39.4686	-39.6348	-40.2453	-40.4084	-42.7031	-41.2756	-43.0427	-44.3997	-44.9967	-45.6381	-45.9994	-45.5292	-45.1339
							1549.1	-38.4081	-39.0985	-38.8029	-39.0256	-39.2261	-39.4496	-39.6148	-40.2216	-40.3832	-42.6661	-41.2404	-42.996	-44.3621	-44.9602	-45.6136	-45.9974	-45.5569	-45.1569
							1549.1	-38.3949	-39.082	-38.7878	-39.0092	-39.2085	-39.4307	-39.595	-40.1982	-40.3581	-42.6293	-41.2057	-42.9496	-44.3244	-44.9234	-45.5883	-45.9941	-45.5838	-45.1796
							1549.11	-38.3818	-39.0656	-38.7728	-38.9929	-39.191	-39.4119	-39.5753	-40.1749	-40.3333	-42.5927	-41.1714	-42.9035	-44.2865	-44.8862	-45.5624	-45.9895	-45.6101	-45.2021
							1549.12	-38.3688	-39.0493	-38.7578	-38.9767	-39.1736	-39.3932	-39.5557	-40.1517	-40.3087	-42.5563	-41.1375	-42.8577	-44.2484	-44.8486	-45.5358	-45.9836	-45.6356	-45.2244
							1549.13	-38.3558	-39.033	-38.743	-38.9605	-39.1564	-39.3746	-39.5362	-40.1288	-40.2843	-42.52	-41.104	-42.8121	-44.2103	-44.8106	-45.5086	-45.9764	-45.6603	-45.2464
							1549.14	-38.3429	-39.0169	-38.7282	-38.9445	-39.1392	-39.3561	-39.5168	-40.1059	-40.2601	-42.484	-41.0709	-42.7668	-44.172	-44.7724	-45.4807	-45.9679	-45.6843	-45.2682
							1549.14	-38.33	-39.0008	-38.7136	-38.9286	-39.1221	-39.3377	-39.4976	-40.0833	-40.2361	-42.4482	-41.0383	-42.7218	-44.1337	-44.7338	-45.4522	-45.958	-45.7074	-45.2898
							1549.15	-38.3173	-38.9848	-38.699	-38.9128	-39.1051	-39.3194	-39.4784	-40.0608	-40.2123	-42.4126	-41.006	-42.6771	-44.0952	-44.6949	-45.4231	-45.9469	-45.7298	-45.3111
							1549.16	-38.3045	-38.9689	-38.6845	-38.8971	-39.0883	-39.3013	-39.4593	-40.0384	-40.1887	-42.3771	-40.9741	-42.6327	-44.0567	-44.6557	-45.3933	-45.9345	-45.7514	-45.3322
							1549.17	-38.2919	-38.9531	-38.6701	-38.8815	-39.0715	-39.2832	-39.4404	-40.0162	-40.1652	-42.3419	-40.9426	-42.5887	-44.0181	-44.6163	-45.363	-45.9208	-45.7721	-45.353
							1549.18	-38.2793	-38.9373	-38.6558	-38.866	-39.0548	-39.2653	-39.4216	-39.9942	-40.142	-42.3069	-40.9115	-42.5449	-43.9794	-44.5767	-45.3321	-45.9059	-45.792	-45.3735
							1549.18	-38.2668	-38.9217	-38.6416	-38.8505	-39.0383	-39.2474	-39.4028	-39.9723	-40.1189	-42.2721	-40.8807	-42.5015	-43.9407	-44.5368	-45.3006	-45.8896	-45.8111	-45.3938
							1549.19	-38.2543	-38.9061	-38.6274	-38.8352	-39.0218	-39.2297	-39.3842	-39.9505	-40.096	-42.2375	-40.8503	-42.4584	-43.9019	-44.4966	-45.2686	-45.8722	-45.8293	-45.4139
							1549.2	-38.2419	-38.8906	-38.6134	-38.82	-39.0054	-39.212	-39.3657	-39.9289	-40.0732	-42.2031	-40.8202	-42.4157	-43.8632	-44.4563	-45.2361	-45.8534	-45.8466	-45.4336
							1549.21	-38.2296	-38.8752	-38.5994	-38.8048	-38.9892	-39.1945	-39.3473	-39.9074	-40.0506	-42.1689	-40.7905	-42.3733	-43.8244	-44.4158	-45.2031	-45.8335	-45.8631	-45.4531
							1549.22	-38.2173	-38.8598	-38.5855	-38.7898	-38.973	-39.1771	-39.329	-39.886	-40.0282	-42.1349	-40.7611	-42.3313	-43.7855	-44.3751	-45.1695	-45.8123	-45.8786	-45.4723
							1549.22	-38.2051	-38.8446	-38.5717	-38.7748	-38.957	-39.1598	-39.3108	-39.8648	-40.0059	-42.1011	-40.7321	-42.2896	-43.7467	-44.3343	-45.1355	-45.79	-45.8933	-45.4912
							1549.23	-38.1929	-38.8294	-38.5579	-38.7599	-38.941	-39.1426	-39.2927	-39.8437	-39.9838	-42.0675	-40.7034	-42.2483	-43.7079	-44.2933	-45.101	-45.7664	-45.907	-45.5098
							1549.24	-38.1808	-38.8142	-38.5443	-38.7452	-38.9252	-39.1255	-39.2747	-39.8227	-39.9618	-42.0341	-40.675	-42.2073	-43.6691	-44.2522	-45.0661	-45.7417	-45.9198	-45.5281
							1549.25	-38.1687	-38.7992	-38.5307	-38.7305	-38.9094	-39.1085	-39.2568	-39.8018	-39.94	-42.001	-40.6469	-42.1667	-43.6303	-44.211	-45.0307	-45.7158	-45.9317	-45.5462
							1549.26	-38.1567	-38.7842	-38.5172	-38.7159	-38.8938	-39.0916	-39.239	-39.7811	-39.9183	-41.968	-40.6191	-42.1264	-43.5916	-44.1696	-44.9949	-45.6888	-45.9427	-45.5639
							1549.26	-38.1448	-38.7693	-38.5037	-38.7013	-38.8782	-39.0748	-39.2214	-39.7605	-39.8968	-41.9353	-40.5916	-42.0865	-43.5529	-44.1282	-44.9587	-45.6607	-45.9527	-45.5813
							1549.27	-38.1329	-38.7545	-38.4904	-38.6869	-38.8627	-39.0581	-39.2038	-39.74	-39.8754	-41.9028	-40.5644	-42.047	-43.5142	-44.0867	-44.9222	-45.6315	-45.9618	-45.5985
							1549.28	-38.1211	-38.7398	-38.4771	-38.6726	-38.8474	-39.0415	-39.1863	-39.7197	-39.8541	-41.8704	-40.5375	-42.0078	-43.4756	-44.0452	-44.8852	-45.6012	-45.9699	-45.6153
							1549.29	-38.1093	-38.7251	-38.4639	-38.6583	-38.8321	-39.025	-39.169	-39.6994	-39.8329	-41.8383	-40.5109	-41.9691	-43.437	-44.0036	-44.8479	-45.5698	-45.977	-45.6318
							1549.3	-38.0976	-38.7105	-38.4508	-38.6441	-38.8169	-39.0086	-39.1517	-39.6793	-39.8119	-41.8064	-40.4845	-41.9306	-43.3986	-43.962	-44.8103	-45.5374	-45.9832	-45.648
							1549.3	-38.086	-38.696	-38.4377	-38.6301	-38.8018	-38.9923	-39.1345	-39.6593	-39.7911	-41.7747	-40.4584	-41.8926	-43.3601	-43.9203	-44.7723	-45.504	-45.9885	-45.6638
							1549.31	-38.0744	-38.6815	-38.4247	-38.616	-38.7868	-38.9761	-39.1175	-39.6394	-39.7703	-41.7432	-40.4325	-41.8549	-43.3218	-43.8787	-44.7341	-45.4695	-45.9927	-45.6794
							1549.32	-38.0628	-38.6671	-38.4118	-38.6021	-38.7719	-38.96	-39.1005	-39.6197	-39.7497	-41.7119	-40.4069	-41.8175	-43.2836	-43.837	-44.6955	-45.4341	-45.996	-45.6946
							1549.33	-38.0513	-38.6528	-38.3989	-38.5883	-38.7571	-38.944	-39.0837	-39.6	-39.7291	-41.6808	-40.3815	-41.7806	-43.2454	-43.7954	-44.6567	-45.3978	-45.9983	-45.7094
							1549.34	-38.0399	-38.6386	-38.3861	-38.5745	-38.7424	-38.9281	-39.0669	-39.5805	-39.7088	-41.6499	-40.3564	-41.744	-43.2074	-43.7537	-44.6176	-45.3605	-45.9997	-45.7239
							1549.34	-38.0285	-38.6244	-38.3734	-38.5608	-38.7277	-38.9124	-39.0503	-39.5611	-39.6885	-41.6192	-40.3315	-41.7077	-43.1694	-43.7122	-44.5782	-45.3223	-46	-45.7381
							1549.35	-38.0171	-38.6103	-38.3607	-38.5472	-38.7132	-38.8967	-39.0338	-39.5417	-39.6683	-41.5887	-40.3068	-41.6718	-43.1316	-43.6706	-44.5387	-45.2833	-45.9994	-45.752
							1549.36	-38.0058	-38.5962	-38.3481	-38.5337	-38.6987	-38.8811	-39.0173	-39.5225	-39.6483	-41.5584	-40.2824	-41.6363	-43.0939	-43.6292	-44.4989	-45.2434	-45.9978	-45.7655
							1549.37	-37.9946	-38.5822	-38.3356	-38.5202	-38.6844	-38.8656	-39.001	-39.5035	-39.6284	-41.5283	-40.2581	-41.6011	-43.0563	-43.5877	-44.4589	-45.2026	-45.9952	-45.7786
							1549.38	-37.9834	-38.5683	-38.3231	-38.5068	-38.6701	-38.8502	-38.9847	-39.4845	-39.6086	-41.4983	-40.2341	-41.5662	-43.0188	-43.5464	-44.4187	-45.1611	-45.9916	-45.7914
							1549.38	-37.9723	-38.5545	-38.3107	-38.4935	-38.6559	-38.8349	-38.9686	-39.4656	-39.5889	-41.4686	-40.2102	-41.5317	-42.9815	-43.5052	-44.3784	-45.1188	-45.987	-45.8039
							1549.39	-37.9612	-38.5407	-38.2984	-38.4802	-38.6418	-38.8196	-38.9526	-39.4469	-39.5693	-41.4391	-40.1866	-41.4976	-42.9443	-43.464	-44.3379	-45.0757	-45.9815	-45.816
							1549.4	-37.9502	-38.527	-38.2861	-38.4671	-38.6277	-38.8045	-38.9366	-39.4282	-39.5498	-41.4097	-40.1631	-41.4638	-42.9072	-43.423	-44.2972	-45.0319	-45.975	-45.8277
							1549.41	-37.9392	-38.5133	-38.2739	-38.454	-38.6138	-38.7895	-38.9208	-39.4097	-39.5305	-41.3806	-40.1398	-41.4303	-42.8703	-43.3821	-44.2565	-44.9875	-45.9676	-45.839
							1549.42	-37.9283	-38.4998	-38.2617	-38.4409	-38.5999	-38.7746	-38.9051	-39.3913	-39.5113	-41.3516	-40.1167	-41.3971	-42.8335	-43.3412	-44.2156	-44.9423	-45.9591	-45.85
							1549.42	-37.9174	-38.4862	-38.2496	-38.428	-38.5861	-38.7597	-38.8894	-39.373	-39.4921	-41.3228	-40.0938	-41.3643	-42.7969	-43.3006	-44.1746	-44.8966	-45.9497	-45.8606
							1549.43	-37.9066	-38.4728	-38.2376	-38.4151	-38.5724	-38.745	-38.8739	-39.3548	-39.4731	-41.2942	-40.0711	-41.3318	-42.7604	-43.26	-44.1335	-44.8502	-45.9394	-45.8709
							1549.44	-37.8958	-38.4594	-38.2256	-38.4022	-38.5588	-38.7303	-38.8584	-39.3367	-39.4542	-41.2658	-40.0485	-41.2996	-42.7241	-43.2196	-44.0924	-44.8032	-45.9281	-45.8807
							1549.45	-37.8851	-38.4461	-38.2137	-38.3895	-38.5452	-38.7157	-38.8431	-39.3187	-39.4354	-41.2375	-40.0261	-41.2678	-42.688	-43.1794	-44.0512	-44.7557	-45.9159	-45.8902
							1549.46	-37.8745	-38.4328	-38.2018	-38.3768	-38.5317	-38.7012	-38.8278	-39.3008	-39.4167	-41.2095	-40.0039	-41.2362	-42.652	-43.1393	-44.0099	-44.7076	-45.9027	-45.8993
							1549.46	-37.8638	-38.4196	-38.19	-38.3641	-38.5183	-38.6868	-38.8127	-39.283	-39.3981	-41.1816	-39.9818	-41.2049	-42.6162	-43.0994	-43.9687	-44.659	-45.8886	-45.9081
							1549.47	-37.8533	-38.4065	-38.1782	-38.3516	-38.505	-38.6725	-38.7976	-39.2654	-39.3796	-41.1539	-39.9598	-41.174	-42.5806	-43.0596	-43.9273	-44.61	-45.8736	-45.9164
							1549.48	-37.8428	-38.3934	-38.1665	-38.3391	-38.4917	-38.6583	-38.7826	-39.2478	-39.3613	-41.1263	-39.9381	-41.1433	-42.5451	-43.0201	-43.886	-44.5606	-45.8576	-45.9244
							1549.49	-37.8323	-38.3804	-38.1549	-38.3266	-38.4785	-38.6441	-38.7677	-39.2303	-39.343	-41.0989	-39.9164	-41.113	-42.5098	-42.9807	-43.8447	-44.5107	-45.8408	-45.9319
							1549.5	-37.8219	-38.3674	-38.1433	-38.3142	-38.4654	-38.6301	-38.753	-39.213	-39.3249	-41.0717	-39.8949	-41.0829	-42.4747	-42.9415	-43.8034	-44.4604	-45.823	-45.9391
							1549.5	-37.8115	-38.3545	-38.1317	-38.3019	-38.4524	-38.6161	-38.7383	-39.1958	-39.3068	-41.0447	-39.8736	-41.0531	-42.4398	-42.9024	-43.7621	-44.4098	-45.8044	-45.9459
							1549.51	-37.8012	-38.3417	-38.1202	-38.2896	-38.4394	-38.6022	-38.7237	-39.1786	-39.2889	-41.0178	-39.8523	-41.0236	-42.405	-42.8636	-43.7208	-44.3588	-45.7849	-45.9523
							1549.52	-37.7909	-38.329	-38.1088	-38.2774	-38.4265	-38.5884	-38.7091	-39.1616	-39.271	-40.9911	-39.8312	-40.9944	-42.3704	-42.825	-43.6796	-44.3075	-45.7646	-45.9583
							1549.53	-37.7807	-38.3162	-38.0974	-38.2653	-38.4137	-38.5746	-38.6947	-39.1447	-39.2533	-40.9646	-39.8103	-40.9654	-42.336	-42.7866	-43.6385	-44.256	-45.7434	-45.9639
							1549.54	-37.7706	-38.3036	-38.0861	-38.2532	-38.4009	-38.561	-38.6804	-39.1278	-39.2357	-40.9382	-39.7895	-40.9367	-42.3018	-42.7484	-43.5974	-44.2042	-45.7213	-45.9691
							1549.54	-37.7604	-38.291	-38.0748	-38.2412	-38.3882	-38.5474	-38.6661	-39.1111	-39.2182	-40.9119	-39.7688	-40.9082	-42.2678	-42.7104	-43.5563	-44.1522	-45.6985	-45.9739
							1549.55	-37.7504	-38.2785	-38.0636	-38.2292	-38.3756	-38.5339	-38.6519	-39.0945	-39.2008	-40.8859	-39.7482	-40.88	-42.234	-42.6726	-43.5154	-44.1	-45.6748	-45.9783
							1549.56	-37.7404	-38.266	-38.0524	-38.2173	-38.363	-38.5204	-38.6379	-39.078	-39.1835	-40.86	-39.7278	-40.8521	-42.2004	-42.6351	-43.4745	-44.0476	-45.6503	-45.9823
							1549.57	-37.7304	-38.2536	-38.0413	-38.2055	-38.3505	-38.5071	-38.6239	-39.0616	-39.1663	-40.8342	-39.7074	-40.8244	-42.1669	-42.5978	-43.4338	-43.9951	-45.625	-45.9858
							1549.58	-37.7205	-38.2412	-38.0302	-38.1937	-38.3381	-38.4938	-38.6099	-39.0452	-39.1492	-40.8086	-39.6872	-40.7969	-42.1336	-42.5606	-43.3931	-43.9424	-45.599	-45.989
							1549.58	-37.7106	-38.229	-38.0192	-38.1819	-38.3257	-38.4806	-38.5961	-39.029	-39.1322	-40.7831	-39.6672	-40.7697	-42.1006	-42.5238	-43.3526	-43.8897	-45.5722	-45.9918
							1549.59	-37.7008	-38.2167	-38.0083	-38.1702	-38.3134	-38.4674	-38.5823	-39.0129	-39.1153	-40.7578	-39.6472	-40.7427	-42.0677	-42.4871	-43.3122	-43.8369	-45.5446	-45.9942
							1549.6	-37.691	-38.2045	-37.9973	-38.1586	-38.3011	-38.4544	-38.5687	-38.9969	-39.0985	-40.7326	-39.6273	-40.7159	-42.035	-42.4507	-43.2719	-43.784	-45.5163	-45.9962
							1549.61	-37.6813	-38.1924	-37.9865	-38.147	-38.2889	-38.4414	-38.5551	-38.981	-39.0818	-40.7076	-39.6076	-40.6894	-42.0025	-42.4145	-43.2318	-43.7311	-45.4873	-45.9977
							1549.62	-37.6716	-38.1804	-37.9757	-38.1355	-38.2768	-38.4284	-38.5415	-38.9652	-39.0653	-40.6827	-39.588	-40.663	-41.9702	-42.3785	-43.1918	-43.6783	-45.4576	-45.9989
							1549.62	-37.662	-38.1684	-37.9649	-38.124	-38.2647	-38.4156	-38.5281	-38.9495	-39.0488	-40.658	-39.5685	-40.6369	-41.9381	-42.3428	-43.152	-43.6254	-45.4273	-45.9997
							1549.63	-37.6524	-38.1564	-37.9542	-38.1126	-38.2527	-38.4028	-38.5147	-38.9338	-39.0324	-40.6334	-39.5491	-40.611	-41.9061	-42.3073	-43.1123	-43.5726	-45.3962	-46
							1549.64	-37.6429	-38.1445	-37.9435	-38.1013	-38.2407	-38.3901	-38.5014	-38.9183	-39.0162	-40.609	-39.5298	-40.5853	-41.8744	-42.272	-43.0728	-43.5199	-45.3645	-45.9999
							1549.65	-37.6334	-38.1327	-37.9329	-38.09	-38.2288	-38.3774	-38.4882	-38.9029	-39	-40.5847	-39.5106	-40.5598	-41.8429	-42.237	-43.0334	-43.4673	-45.3322	-45.9995
							1549.66	-37.6239	-38.1209	-37.9224	-38.0787	-38.217	-38.3648	-38.4751	-38.8875	-38.9839	-40.5605	-39.4916	-40.5345	-41.8115	-42.2022	-42.9942	-43.4147	-45.2993	-45.9986
							1549.66	-37.6146	-38.1092	-37.9119	-38.0675	-38.2052	-38.3523	-38.462	-38.8723	-38.968	-40.5365	-39.4726	-40.5093	-41.7803	-42.1676	-42.9553	-43.3623	-45.2657	-45.9973
							1549.67	-37.6052	-38.0975	-37.9014	-38.0563	-38.1935	-38.3398	-38.449	-38.8572	-38.9521	-40.5125	-39.4538	-40.4844	-41.7493	-42.1333	-42.9165	-43.3101	-45.2316	-45.9956
							1549.68	-37.5959	-38.0859	-37.891	-38.0453	-38.1818	-38.3274	-38.4361	-38.8421	-38.9363	-40.4888	-39.435	-40.4597	-41.7185	-42.0992	-42.8778	-43.258	-45.1969	-45.9935
							1549.69	-37.5867	-38.0744	-37.8806	-38.0342	-38.1702	-38.315	-38.4232	-38.8271	-38.9207	-40.4651	-39.4164	-40.4351	-41.6879	-42.0654	-42.8394	-43.2062	-45.1617	-45.991
							1549.7	-37.5775	-38.0629	-37.8703	-38.0232	-38.1587	-38.3028	-38.4104	-38.8122	-38.9051	-40.4416	-39.3979	-40.4107	-41.6575	-42.0318	-42.8012	-43.1545	-45.1259	-45.9881
							1549.7	-37.5683	-38.0514	-37.8601	-38.0123	-38.1472	-38.2905	-38.3977	-38.7975	-38.8896	-40.4183	-39.3795	-40.3865	-41.6273	-41.9984	-42.7632	-43.1031	-45.0896	-45.9848
							1549.71	-37.5592	-38.04	-37.8498	-38.0014	-38.1357	-38.2784	-38.385	-38.7828	-38.8743	-40.395	-39.3612	-40.3624	-41.5972	-41.9652	-42.7254	-43.0519	-45.0529	-45.9811
							1549.72	-37.5501	-38.0287	-37.8397	-37.9905	-38.1243	-38.2663	-38.3724	-38.7681	-38.859	-40.3719	-39.343	-40.3386	-41.5673	-41.9323	-42.6877	-43.0009	-45.0156	-45.977
							1549.73	-37.5411	-38.0174	-37.8296	-37.9798	-38.113	-38.2542	-38.3599	-38.7536	-38.8438	-40.3489	-39.3249	-40.3149	-41.5377	-41.8996	-42.6503	-42.9503	-44.9779	-45.9725
							1549.74	-37.5321	-38.0062	-37.8195	-37.969	-38.1017	-38.2422	-38.3474	-38.7392	-38.8287	-40.326	-39.3069	-40.2913	-41.5081	-41.8672	-42.6132	-42.8999	-44.9398	-45.9676
							1549.74	-37.5232	-37.995	-37.8095	-37.9583	-38.0904	-38.2303	-38.335	-38.7248	-38.8137	-40.3033	-39.289	-40.2679	-41.4788	-41.835	-42.5762	-42.8498	-44.9012	-45.9623
							1549.75	-37.5143	-37.9839	-37.7995	-37.9477	-38.0793	-38.2184	-38.3227	-38.7105	-38.7988	-40.2806	-39.2712	-40.2447	-41.4497	-41.803	-42.5395	-42.8	-44.8622	-45.9566
							1549.76	-37.5055	-37.9728	-37.7896	-37.9371	-38.0681	-38.2066	-38.3104	-38.6964	-38.784	-40.2581	-39.2535	-40.2216	-41.4207	-41.7712	-42.5029	-42.7506	-44.8229	-45.9505
							1549.77	-37.4967	-37.9618	-37.7797	-37.9266	-38.0571	-38.1949	-38.2982	-38.6822	-38.7693	-40.2358	-39.236	-40.1987	-41.3919	-41.7396	-42.4666	-42.7015	-44.7832	-45.9441
							1549.78	-37.4879	-37.9508	-37.7699	-37.9161	-38.046	-38.1832	-38.2861	-38.6682	-38.7547	-40.2135	-39.2185	-40.1759	-41.3633	-41.7083	-42.4305	-42.6528	-44.7431	-45.9372
							1549.78	-37.4792	-37.9399	-37.7601	-37.9057	-38.0351	-38.1715	-38.274	-38.6543	-38.7402	-40.1913	-39.2012	-40.1533	-41.3348	-41.6772	-42.3947	-42.6044	-44.7027	-45.9299
							1549.79	-37.4705	-37.9291	-37.7504	-37.8953	-38.0242	-38.1599	-38.2619	-38.6404	-38.7257	-40.1693	-39.1839	-40.1308	-41.3065	-41.6463	-42.359	-42.5564	-44.662	-45.9223
							1549.8	-37.4619	-37.9182	-37.7407	-37.885	-38.0133	-38.1484	-38.25	-38.6266	-38.7114	-40.1474	-39.1667	-40.1085	-41.2784	-41.6156	-42.3236	-42.5088	-44.6209	-45.9143
							1549.81	-37.4533	-37.9075	-37.7311	-37.8747	-38.0025	-38.1369	-38.2381	-38.6129	-38.6971	-40.1256	-39.1497	-40.0863	-41.2505	-41.5852	-42.2885	-42.4616	-44.5797	-45.9058
							1549.82	-37.4448	-37.8968	-37.7215	-37.8645	-37.9917	-38.1255	-38.2262	-38.5993	-38.6829	-40.1039	-39.1328	-40.0642	-41.2227	-41.5549	-42.2535	-42.4147	-44.5381	-45.8971
							1549.82	-37.4363	-37.8861	-37.712	-37.8543	-37.981	-38.1141	-38.2144	-38.5857	-38.6688	-40.0824	-39.1159	-40.0423	-41.1951	-41.5249	-42.2188	-42.3683	-44.4963	-45.8879
							1549.83	-37.4278	-37.8755	-37.7025	-37.8442	-37.9703	-38.1028	-38.2027	-38.5722	-38.6548	-40.0609	-39.0992	-40.0205	-41.1676	-41.4951	-42.1843	-42.3223	-44.4543	-45.8783
							1549.84	-37.4194	-37.865	-37.6931	-37.8341	-37.9597	-38.0915	-38.191	-38.5588	-38.6409	-40.0396	-39.0825	-39.9988	-41.1403	-41.4655	-42.1501	-42.2767	-44.4121	-45.8684
							1549.85	-37.411	-37.8544	-37.6837	-37.8241	-37.9492	-38.0803	-38.1793	-38.5454	-38.627	-40.0184	-39.066	-39.9773	-41.1132	-41.4361	-42.116	-42.2316	-44.3697	-45.8581
							1549.86	-37.4027	-37.844	-37.6743	-37.8141	-37.9387	-38.0692	-38.1678	-38.5322	-38.6132	-39.9972	-39.0496	-39.9559	-41.0863	-41.4068	-42.0822	-42.1869	-44.3271	-45.8475
							1549.86	-37.3944	-37.8336	-37.665	-37.8042	-37.9282	-38.0581	-38.1562	-38.519	-38.5995	-39.9762	-39.0332	-39.9346	-41.0595	-41.3778	-42.0487	-42.1426	-44.2843	-45.8365
							1549.87	-37.3861	-37.8232	-37.6558	-37.7943	-37.9178	-38.047	-38.1448	-38.5058	-38.5859	-39.9553	-39.017	-39.9135	-41.0328	-41.349	-42.0153	-42.0987	-44.2414	-45.8251
							1549.88	-37.3779	-37.8129	-37.6466	-37.7845	-37.9074	-38.036	-38.1334	-38.4928	-38.5724	-39.9346	-39.0009	-39.8924	-41.0063	-41.3204	-41.9822	-42.0554	-44.1984	-45.8133
							1549.89	-37.3697	-37.8027	-37.6374	-37.7747	-37.8971	-38.0251	-38.122	-38.4798	-38.5589	-39.9139	-38.9849	-39.8715	-40.98	-41.292	-41.9493	-42.0124	-44.1553	-45.8013
							1549.9	-37.3616	-37.7924	-37.6283	-37.765	-37.8869	-38.0142	-38.1107	-38.4669	-38.5456	-39.8933	-38.9689	-39.8508	-40.9538	-41.2638	-41.9166	-41.9699	-44.1121	-45.7888
							1549.9	-37.3535	-37.7823	-37.6193	-37.7553	-37.8767	-38.0033	-38.0994	-38.454	-38.5323	-39.8728	-38.9531	-39.8301	-40.9277	-41.2357	-41.8842	-41.9279	-44.0688	-45.776
							1549.91	-37.3454	-37.7721	-37.6102	-37.7457	-37.8665	-37.9925	-38.0882	-38.4412	-38.519	-39.8525	-38.9374	-39.8096	-40.9018	-41.2079	-41.852	-41.8863	-44.0254	-45.7629
							1549.92	-37.3374	-37.7621	-37.6013	-37.7361	-37.8564	-37.9818	-38.0771	-38.4285	-38.5059	-39.8322	-38.9217	-39.7892	-40.8761	-41.1802	-41.82	-41.8451	-43.982	-45.7494
							1549.93	-37.3294	-37.7521	-37.5923	-37.7266	-37.8463	-37.9711	-38.066	-38.4158	-38.4928	-39.8121	-38.9062	-39.7689	-40.8505	-41.1527	-41.7882	-41.8045	-43.9386	-45.7356
							1549.94	-37.3214	-37.7421	-37.5835	-37.7171	-37.8363	-37.9604	-38.0549	-38.4032	-38.4798	-39.792	-38.8908	-39.7487	-40.8251	-41.1254	-41.7566	-41.7642	-43.8951	-45.7214
							1549.94	-37.3135	-37.7321	-37.5746	-37.7076	-37.8264	-37.9498	-38.044	-38.3907	-38.4668	-39.7721	-38.8754	-39.7287	-40.7998	-41.0983	-41.7253	-41.7244	-43.8516	-45.7069
							1549.95	-37.3056	-37.7223	-37.5658	-37.6983	-37.8164	-37.9393	-38.033	-38.3782	-38.454	-39.7522	-38.8602	-39.7087	-40.7746	-41.0714	-41.6942	-41.6851	-43.8081	-45.6921
							1549.96	-37.2978	-37.7124	-37.5571	-37.6889	-37.8066	-37.9288	-38.0221	-38.3658	-38.4412	-39.7325	-38.845	-39.6889	-40.7496	-41.0446	-41.6633	-41.6463	-43.7647	-45.677
							1549.97	-37.2899	-37.7026	-37.5484	-37.6796	-37.7968	-37.9184	-38.0113	-38.3534	-38.4284	-39.7129	-38.83	-39.6692	-40.7247	-41.018	-41.6326	-41.6078	-43.7213	-45.6615
							1549.98	-37.2822	-37.6929	-37.5397	-37.6704	-37.787	-37.908	-38.0005	-38.3411	-38.4158	-39.6933	-38.815	-39.6496	-40.6999	-40.9916	-41.6021	-41.5699	-43.6779	-45.6457
							1549.98	-37.2744	-37.6832	-37.5311	-37.6612	-37.7773	-37.8976	-37.9898	-38.3289	-38.4032	-39.6739	-38.8002	-39.6302	-40.6753	-40.9653	-41.5718	-41.5323	-43.6346	-45.6296
							1549.99	-37.2667	-37.6735	-37.5225	-37.652	-37.7676	-37.8873	-37.9791	-38.3167	-38.3906	-39.6545	-38.7854	-39.6108	-40.6508	-40.9392	-41.5417	-41.4953	-43.5914	-45.6132
							1550	-37.259	-37.6639	-37.514	-37.6429	-37.758	-37.8771	-37.9685	-38.3046	-38.3781	-39.6353	-38.7707	-39.5915	-40.6265	-40.9133	-41.5119	-41.4586	-43.5482	-45.5965
							1550.01	-37.2514	-37.6543	-37.5055	-37.6339	-37.7484	-37.8669	-37.9579	-38.2925	-38.3657	-39.6161	-38.7561	-39.5724	-40.6023	-40.8876	-41.4822	-41.4224	-43.5052	-45.5795
							1550.02	-37.2438	-37.6448	-37.497	-37.6249	-37.7389	-37.8568	-37.9474	-38.2805	-38.3534	-39.5971	-38.7416	-39.5534	-40.5782	-40.862	-41.4528	-41.3866	-43.4622	-45.5622
							1550.02	-37.2362	-37.6353	-37.4886	-37.6159	-37.7294	-37.8467	-37.9369	-38.2686	-38.3411	-39.5781	-38.7272	-39.5345	-40.5543	-40.8365	-41.4235	-41.3512	-43.4194	-45.5446
							1550.03	-37.2287	-37.6259	-37.4802	-37.607	-37.72	-37.8366	-37.9264	-38.2567	-38.3289	-39.5593	-38.7129	-39.5157	-40.5304	-40.8112	-41.3944	-41.3163	-43.3767	-45.5268
							1550.04	-37.2212	-37.6165	-37.4719	-37.5981	-37.7106	-37.8267	-37.9161	-38.2448	-38.3167	-39.5405	-38.6986	-39.497	-40.5068	-40.7861	-41.3656	-41.2818	-43.3341	-45.5086
							1550.05	-37.2137	-37.6071	-37.4636	-37.5893	-37.7012	-37.8167	-37.9057	-38.2331	-38.3046	-39.5219	-38.6845	-39.4784	-40.4832	-40.7611	-41.3369	-41.2477	-43.2916	-45.4901
							1550.06	-37.2063	-37.5978	-37.4554	-37.5805	-37.6919	-37.8068	-37.8955	-38.2213	-38.2926	-39.5033	-38.6704	-39.4599	-40.4598	-40.7363	-41.3084	-41.214	-43.2494	-45.4714
							1550.06	-37.1989	-37.5885	-37.4471	-37.5718	-37.6827	-37.797	-37.8852	-38.2097	-38.2806	-39.4848	-38.6564	-39.4415	-40.4364	-40.7116	-41.2801	-41.1807	-43.2072	-45.4524
							1550.07	-37.1915	-37.5793	-37.439	-37.5631	-37.6735	-37.7872	-37.8751	-38.1981	-38.2687	-39.4664	-38.6425	-39.4233	-40.4132	-40.6871	-41.252	-41.1478	-43.1653	-45.4332
							1550.08	-37.1842	-37.5701	-37.4308	-37.5544	-37.6643	-37.7774	-37.8649	-38.1865	-38.2568	-39.4481	-38.6287	-39.4051	-40.3902	-40.6627	-41.2241	-41.1153	-43.1235	-45.4136
							1550.09	-37.1769	-37.561	-37.4228	-37.5458	-37.6552	-37.7677	-37.8549	-38.175	-38.245	-39.4299	-38.615	-39.3871	-40.3672	-40.6384	-41.1964	-41.0831	-43.0819	-45.3938
							1550.1	-37.1696	-37.5519	-37.4147	-37.5373	-37.6461	-37.7581	-37.8448	-38.1636	-38.2332	-39.4118	-38.6013	-39.3691	-40.3444	-40.6143	-41.1688	-41.0514	-43.0405	-45.3738
							1550.1	-37.1624	-37.5428	-37.4067	-37.5287	-37.6371	-37.7485	-37.8348	-38.1522	-38.2215	-39.3938	-38.5877	-39.3513	-40.3217	-40.5904	-41.1414	-41.02	-42.9993	-45.3535
							1550.11	-37.1552	-37.5338	-37.3987	-37.5203	-37.6281	-37.7389	-37.8249	-38.1408	-38.2099	-39.3759	-38.5742	-39.3336	-40.2991	-40.5666	-41.1142	-40.9889	-42.9583	-45.333
							1550.12	-37.148	-37.5248	-37.3908	-37.5118	-37.6192	-37.7294	-37.815	-38.1295	-38.1983	-39.358	-38.5608	-39.316	-40.2766	-40.5429	-41.0872	-40.9583	-42.9175	-45.3122
							1550.13	-37.1409	-37.5158	-37.3829	-37.5034	-37.6103	-37.7199	-37.8052	-38.1183	-38.1868	-39.3403	-38.5475	-39.2984	-40.2543	-40.5194	-41.0603	-40.928	-42.877	-45.2912
							1550.14	-37.1337	-37.5069	-37.375	-37.4951	-37.6015	-37.7105	-37.7954	-38.1071	-38.1753	-39.3226	-38.5342	-39.281	-40.232	-40.496	-41.0337	-40.898	-42.8366	-45.2699
							1550.14	-37.1267	-37.4981	-37.3672	-37.4868	-37.5927	-37.7012	-37.7857	-38.096	-38.1639	-39.305	-38.521	-39.2637	-40.2099	-40.4727	-41.0071	-40.8684	-42.7965	-45.2485
							1550.15	-37.1196	-37.4893	-37.3594	-37.4785	-37.5839	-37.6919	-37.776	-38.0849	-38.1525	-39.2875	-38.5079	-39.2465	-40.1879	-40.4496	-40.9808	-40.839	-42.7566	-45.2268
							1550.16	-37.1126	-37.4805	-37.3516	-37.4703	-37.5752	-37.6826	-37.7664	-38.0739	-38.1412	-39.2701	-38.4948	-39.2294	-40.166	-40.4266	-40.9546	-40.8101	-42.717	-45.2049
							1550.17	-37.1056	-37.4717	-37.3439	-37.4621	-37.5665	-37.6734	-37.7568	-38.0629	-38.1299	-39.2528	-38.4819	-39.2124	-40.1442	-40.4037	-40.9286	-40.7814	-42.6776	-45.1827
							1550.18	-37.0987	-37.463	-37.3362	-37.4539	-37.5579	-37.6642	-37.7473	-38.052	-38.1187	-39.2355	-38.469	-39.1955	-40.1225	-40.3809	-40.9027	-40.753	-42.6384	-45.1604
							1550.18	-37.0917	-37.4544	-37.3286	-37.4458	-37.5493	-37.655	-37.7378	-38.0411	-38.1075	-39.2184	-38.4561	-39.1787	-40.1009	-40.3583	-40.877	-40.725	-42.5995	-45.1378
							1550.19	-37.0848	-37.4457	-37.321	-37.4377	-37.5408	-37.646	-37.7283	-38.0303	-38.0964	-39.2013	-38.4433	-39.162	-40.0794	-40.3359	-40.8515	-40.6972	-42.5609	-45.1151
							1550.2	-37.078	-37.4371	-37.3134	-37.4297	-37.5323	-37.6369	-37.719	-38.0195	-38.0853	-39.1843	-38.4306	-39.1454	-40.0581	-40.3135	-40.8261	-40.6698	-42.5225	-45.0922
							1550.21	-37.0711	-37.4286	-37.3058	-37.4217	-37.5238	-37.6279	-37.7096	-38.0088	-38.0743	-39.1674	-38.418	-39.1289	-40.0368	-40.2913	-40.8009	-40.6426	-42.4843	-45.069
							1550.22	-37.0643	-37.4201	-37.2983	-37.4138	-37.5154	-37.619	-37.7003	-37.9981	-38.0634	-39.1506	-38.4054	-39.1124	-40.0157	-40.2692	-40.7758	-40.6157	-42.4464	-45.0457
							1550.22	-37.0576	-37.4116	-37.2909	-37.4058	-37.507	-37.6101	-37.6911	-37.9875	-38.0525	-39.1339	-38.3929	-39.0961	-39.9946	-40.2472	-40.7509	-40.589	-42.4088	-45.0222
							1550.23	-37.0508	-37.4032	-37.2834	-37.398	-37.4986	-37.6012	-37.6819	-37.9769	-38.0416	-39.1172	-38.3805	-39.0799	-39.9737	-40.2253	-40.7261	-40.5626	-42.3715	-44.9985
							1550.24	-37.0441	-37.3948	-37.276	-37.3901	-37.4903	-37.5924	-37.6727	-37.9664	-38.0308	-39.1006	-38.3681	-39.0638	-39.9529	-40.2036	-40.7015	-40.5365	-42.3344	-44.9746
							1550.25	-37.0374	-37.3864	-37.2686	-37.3823	-37.4821	-37.5836	-37.6636	-37.956	-38.0201	-39.0841	-38.3558	-39.0478	-39.9322	-40.182	-40.677	-40.5107	-42.2975	-44.9506
							1550.26	-37.0308	-37.3781	-37.2613	-37.3745	-37.4738	-37.5749	-37.6546	-37.9456	-38.0094	-39.0677	-38.3436	-39.0318	-39.9115	-40.1605	-40.6527	-40.485	-42.261	-44.9264
							1550.26	-37.0242	-37.3698	-37.254	-37.3668	-37.4657	-37.5662	-37.6455	-37.9352	-37.9987	-39.0514	-38.3314	-39.016	-39.891	-40.1391	-40.6285	-40.4596	-42.2247	-44.9021
							1550.27	-37.0176	-37.3616	-37.2467	-37.3591	-37.4575	-37.5576	-37.6366	-37.9249	-37.9881	-39.0351	-38.3192	-39.0002	-39.8706	-40.1178	-40.6044	-40.4345	-42.1887	-44.8775
							1550.28	-37.011	-37.3533	-37.2395	-37.3514	-37.4494	-37.549	-37.6277	-37.9146	-37.9775	-39.0189	-38.3072	-38.9846	-39.8503	-40.0967	-40.5805	-40.4095	-42.1529	-44.8529
							1550.29	-37.0045	-37.3452	-37.2323	-37.3438	-37.4413	-37.5404	-37.6188	-37.9044	-37.967	-39.0028	-38.2952	-38.969	-39.8301	-40.0757	-40.5567	-40.3848	-42.1174	-44.8281
							1550.3	-36.998	-37.337	-37.2251	-37.3362	-37.4333	-37.5319	-37.61	-37.8943	-37.9566	-38.9868	-38.2832	-38.9535	-39.8099	-40.0547	-40.5331	-40.3603	-42.0822	-44.8031
							1550.3	-36.9915	-37.3289	-37.2179	-37.3286	-37.4253	-37.5234	-37.6012	-37.8842	-37.9462	-38.9709	-38.2713	-38.9381	-39.7899	-40.034	-40.5096	-40.336	-42.0472	-44.778
							1550.31	-36.9851	-37.3209	-37.2108	-37.3211	-37.4173	-37.515	-37.5924	-37.8741	-37.9358	-38.955	-38.2595	-38.9228	-39.77	-40.0133	-40.4862	-40.3119	-42.0126	-44.7527
							1550.32	-36.9787	-37.3128	-37.2037	-37.3136	-37.4094	-37.5066	-37.5837	-37.8641	-37.9255	-38.9392	-38.2477	-38.9076	-39.7502	-39.9927	-40.463	-40.288	-41.9781	-44.7274
							1550.33	-36.9723	-37.3048	-37.1967	-37.3061	-37.4015	-37.4982	-37.5751	-37.8542	-37.9153	-38.9234	-38.236	-38.8925	-39.7304	-39.9722	-40.4399	-40.2643	-41.944	-44.7019
							1550.34	-36.966	-37.2969	-37.1897	-37.2987	-37.3937	-37.4899	-37.5665	-37.8442	-37.9051	-38.9078	-38.2243	-38.8775	-39.7108	-39.9519	-40.4169	-40.2408	-41.9101	-44.6763
							1550.34	-36.9597	-37.289	-37.1827	-37.2913	-37.3859	-37.4816	-37.5579	-37.8344	-37.8949	-38.8922	-38.2127	-38.8625	-39.6913	-39.9317	-40.3941	-40.2175	-41.8765	-44.6505
							1550.35	-36.9534	-37.2811	-37.1757	-37.284	-37.3781	-37.4734	-37.5494	-37.8246	-37.8848	-38.8767	-38.2011	-38.8476	-39.6718	-39.9115	-40.3714	-40.1943	-41.8431	-44.6247
							1550.36	-36.9471	-37.2732	-37.1688	-37.2766	-37.3703	-37.4652	-37.5409	-37.8148	-37.8747	-38.8613	-38.1896	-38.8329	-39.6525	-39.8915	-40.3488	-40.1714	-41.81	-44.5987
							1550.37	-36.9409	-37.2654	-37.1619	-37.2693	-37.3626	-37.4571	-37.5325	-37.8051	-37.8647	-38.8459	-38.1782	-38.8182	-39.6332	-39.8716	-40.3264	-40.1486	-41.7772	-44.5726
							1550.38	-36.9347	-37.2576	-37.1551	-37.2621	-37.355	-37.449	-37.5241	-37.7955	-37.8548	-38.8306	-38.1668	-38.8035	-39.6141	-39.8518	-40.3041	-40.1259	-41.7446	-44.5464
							1550.38	-36.9286	-37.2499	-37.1482	-37.2548	-37.3473	-37.4409	-37.5157	-37.7858	-37.8449	-38.8154	-38.1554	-38.789	-39.595	-39.8322	-40.2819	-40.1034	-41.7122	-44.5202
							1550.39	-36.9224	-37.2422	-37.1414	-37.2476	-37.3397	-37.4329	-37.5074	-37.7763	-37.835	-38.8003	-38.1441	-38.7745	-39.5761	-39.8126	-40.2598	-40.0811	-41.6802	-44.4938
							1550.4	-36.9163	-37.2345	-37.1347	-37.2405	-37.3321	-37.4249	-37.4992	-37.7668	-37.8252	-38.7852	-38.1329	-38.7601	-39.5572	-39.7931	-40.2378	-40.0589	-41.6483	-44.4673
							1550.41	-36.9102	-37.2269	-37.1279	-37.2333	-37.3246	-37.4169	-37.4909	-37.7573	-37.8154	-38.7702	-38.1217	-38.7458	-39.5384	-39.7737	-40.216	-40.0369	-41.6167	-44.4408
							1550.42	-36.9042	-37.2193	-37.1212	-37.2262	-37.3171	-37.409	-37.4827	-37.7479	-37.8057	-38.7552	-38.1106	-38.7316	-39.5197	-39.7545	-40.1943	-40.0151	-41.5854	-44.4141
							1550.42	-36.8982	-37.2117	-37.1146	-37.2192	-37.3096	-37.4011	-37.4746	-37.7385	-37.796	-38.7404	-38.0995	-38.7175	-39.5011	-39.7353	-40.1727	-39.9933	-41.5543	-44.3874
							1550.43	-36.8922	-37.2042	-37.1079	-37.2121	-37.3022	-37.3932	-37.4665	-37.7292	-37.7864	-38.7256	-38.0884	-38.7034	-39.4826	-39.7163	-40.1512	-39.9717	-41.5235	-44.3606
							1550.44	-36.8862	-37.1967	-37.1013	-37.2051	-37.2948	-37.3854	-37.4584	-37.7199	-37.7768	-38.7109	-38.0774	-38.6894	-39.4641	-39.6973	-40.1299	-39.9503	-41.4928	-44.3337
							1550.45	-36.8803	-37.1892	-37.0947	-37.1981	-37.2874	-37.3776	-37.4504	-37.7107	-37.7673	-38.6962	-38.0665	-38.6755	-39.4458	-39.6785	-40.1086	-39.929	-41.4625	-44.3068
							1550.46	-36.8744	-37.1818	-37.0882	-37.1912	-37.2801	-37.3699	-37.4424	-37.7015	-37.7578	-38.6816	-38.0556	-38.6616	-39.4275	-39.6597	-40.0875	-39.9078	-41.4323	-44.2797
							1550.46	-36.8685	-37.1744	-37.0817	-37.1843	-37.2728	-37.3622	-37.4344	-37.6924	-37.7484	-38.6671	-38.0448	-38.6478	-39.4094	-39.6411	-40.0665	-39.8868	-41.4024	-44.2527
							1550.47	-36.8627	-37.1671	-37.0752	-37.1774	-37.2655	-37.3545	-37.4265	-37.6833	-37.739	-38.6526	-38.034	-38.6341	-39.3913	-39.6225	-40.0456	-39.8658	-41.3727	-44.2255
							1550.48	-36.8569	-37.1597	-37.0687	-37.1705	-37.2583	-37.3469	-37.4186	-37.6743	-37.7296	-38.6382	-38.0233	-38.6205	-39.3733	-39.6041	-40.0249	-39.8451	-41.3433	-44.1983
							1550.49	-36.8511	-37.1524	-37.0623	-37.1637	-37.2511	-37.3393	-37.4108	-37.6653	-37.7204	-38.6239	-38.0126	-38.6069	-39.3554	-39.5857	-40.0042	-39.8244	-41.314	-44.1711
							1550.5	-36.8453	-37.1452	-37.0559	-37.1569	-37.2439	-37.3317	-37.403	-37.6564	-37.7111	-38.6096	-38.002	-38.5934	-39.3376	-39.5675	-39.9837	-39.8038	-41.285	-44.1438
							1550.5	-36.8396	-37.138	-37.0495	-37.1501	-37.2368	-37.3242	-37.3952	-37.6475	-37.7019	-38.5954	-37.9914	-38.58	-39.3198	-39.5493	-39.9632	-39.7834	-41.2562	-44.1164
							1550.51	-36.8339	-37.1308	-37.0432	-37.1434	-37.2297	-37.3167	-37.3875	-37.6386	-37.6928	-38.5813	-37.9808	-38.5666	-39.3022	-39.5313	-39.9429	-39.7631	-41.2276	-44.089
							1550.52	-36.8283	-37.1236	-37.0369	-37.1367	-37.2226	-37.3092	-37.3798	-37.6298	-37.6837	-38.5672	-37.9703	-38.5534	-39.2846	-39.5133	-39.9227	-39.7429	-41.1992	-44.0616
							1550.53	-36.8226	-37.1165	-37.0306	-37.13	-37.2156	-37.3018	-37.3721	-37.621	-37.6746	-38.5532	-37.9599	-38.5401	-39.2671	-39.4955	-39.9026	-39.7228	-41.171	-44.0341
							1550.54	-36.817	-37.1094	-37.0243	-37.1234	-37.2085	-37.2944	-37.3645	-37.6123	-37.6656	-38.5393	-37.9495	-38.527	-39.2497	-39.4777	-39.8826	-39.7029	-41.1431	-44.0066
							1550.54	-36.8114	-37.1024	-37.0181	-37.1168	-37.2016	-37.2871	-37.3569	-37.6036	-37.6566	-38.5254	-37.9392	-38.5139	-39.2324	-39.46	-39.8627	-39.683	-41.1153	-43.979
							1550.55	-36.8059	-37.0954	-37.0119	-37.1102	-37.1946	-37.2797	-37.3494	-37.595	-37.6477	-38.5116	-37.9289	-38.5009	-39.2151	-39.4424	-39.843	-39.6633	-41.0877	-43.9514
							1550.56	-36.8004	-37.0884	-37.0058	-37.1036	-37.1877	-37.2724	-37.3418	-37.5864	-37.6388	-38.4979	-37.9186	-38.4879	-39.198	-39.425	-39.8233	-39.6437	-41.0603	-43.9238
							1550.57	-36.7949	-37.0814	-36.9997	-37.0971	-37.1808	-37.2652	-37.3344	-37.5779	-37.63	-38.4842	-37.9084	-38.475	-39.1809	-39.4076	-39.8038	-39.6242	-41.0332	-43.8962
							1550.58	-36.7894	-37.0745	-36.9936	-37.0906	-37.174	-37.2579	-37.3269	-37.5694	-37.6212	-38.4706	-37.8983	-38.4622	-39.1639	-39.3903	-39.7843	-39.6048	-41.0062	-43.8686
							1550.58	-36.784	-37.0676	-36.9875	-37.0841	-37.1671	-37.2507	-37.3195	-37.5609	-37.6124	-38.457	-37.8882	-38.4494	-39.147	-39.3731	-39.765	-39.5855	-40.9794	-43.8409
							1550.59	-36.7785	-37.0608	-36.9815	-37.0777	-37.1603	-37.2436	-37.3121	-37.5525	-37.6037	-38.4435	-37.8782	-38.4367	-39.1301	-39.356	-39.7457	-39.5663	-40.9528	-43.8132
							1550.6	-36.7732	-37.054	-36.9755	-37.0713	-37.1536	-37.2365	-37.3047	-37.5441	-37.5951	-38.4301	-37.8682	-38.424	-39.1134	-39.3389	-39.7266	-39.5472	-40.9263	-43.7855
							1550.61	-36.7678	-37.0472	-36.9695	-37.0649	-37.1469	-37.2294	-37.2974	-37.5358	-37.5865	-38.4167	-37.8582	-38.4114	-39.0967	-39.322	-39.7075	-39.5282	-40.9001	-43.7578
							1550.62	-36.7625	-37.0405	-36.9635	-37.0586	-37.1402	-37.2223	-37.2901	-37.5275	-37.5779	-38.4034	-37.8483	-38.3989	-39.0801	-39.3051	-39.6886	-39.5094	-40.874	-43.7301
							1550.62	-36.7572	-37.0337	-36.9576	-37.0522	-37.1335	-37.2153	-37.2829	-37.5193	-37.5694	-38.3902	-37.8384	-38.3864	-39.0636	-39.2884	-39.6698	-39.4906	-40.8481	-43.7023
							1550.63	-36.7519	-37.0271	-36.9517	-37.046	-37.1269	-37.2082	-37.2756	-37.5111	-37.5609	-38.377	-37.8286	-38.374	-39.0471	-39.2717	-39.6511	-39.472	-40.8224	-43.6746
							1550.64	-36.7466	-37.0204	-36.9459	-37.0397	-37.1203	-37.2013	-37.2684	-37.5029	-37.5524	-38.3638	-37.8189	-38.3617	-39.0307	-39.2551	-39.6324	-39.4534	-40.7968	-43.6468
							1550.65	-36.7414	-37.0138	-36.9401	-37.0335	-37.1137	-37.1943	-37.2613	-37.4948	-37.544	-38.3508	-37.8092	-38.3494	-39.0144	-39.2386	-39.6139	-39.435	-40.7714	-43.6191
							1550.66	-36.7362	-37.0072	-36.9343	-37.0273	-37.1071	-37.1874	-37.2542	-37.4867	-37.5357	-38.3378	-37.7995	-38.3372	-38.9982	-39.2222	-39.5955	-39.4166	-40.7462	-43.5914
							1550.66	-36.7311	-37.0007	-36.9285	-37.0211	-37.1006	-37.1806	-37.2471	-37.4786	-37.5273	-38.3248	-37.7899	-38.325	-38.9821	-39.2059	-39.5771	-39.3984	-40.7211	-43.5636
							1550.67	-36.7259	-36.9941	-36.9228	-37.015	-37.0941	-37.1737	-37.24	-37.4706	-37.5191	-38.3119	-37.7803	-38.3129	-38.966	-39.1896	-39.5589	-39.3803	-40.6962	-43.5359
							1550.68	-36.7208	-36.9877	-36.917	-37.0089	-37.0877	-37.1669	-37.233	-37.4627	-37.5108	-38.2991	-37.7708	-38.3008	-38.95	-39.1735	-39.5408	-39.3622	-40.6715	-43.5082
							1550.69	-36.7157	-36.9812	-36.9114	-37.0028	-37.0813	-37.1601	-37.2259	-37.4547	-37.5026	-38.2863	-37.7613	-38.2888	-38.934	-39.1574	-39.5227	-39.3443	-40.6469	-43.4805
							1550.7	-36.7107	-36.9748	-36.9057	-36.9967	-37.0749	-37.1534	-37.219	-37.4468	-37.4945	-38.2736	-37.7519	-38.2769	-38.9182	-39.1414	-39.5048	-39.3265	-40.6225	-43.4528
							1550.7	-36.7056	-36.9684	-36.9001	-36.9907	-37.0685	-37.1466	-37.212	-37.439	-37.4863	-38.2609	-37.7425	-38.265	-38.9024	-39.1255	-39.4869	-39.3088	-40.5982	-43.4251
							1550.71	-36.7006	-36.962	-36.8945	-36.9847	-37.0622	-37.14	-37.2051	-37.4312	-37.4783	-38.2483	-37.7332	-38.2531	-38.8867	-39.1097	-39.4692	-39.2912	-40.5741	-43.3974
							1550.72	-36.6956	-36.9557	-36.8889	-36.9787	-37.0559	-37.1333	-37.1982	-37.4234	-37.4702	-38.2358	-37.7239	-38.2414	-38.8711	-39.0939	-39.4515	-39.2737	-40.5501	-43.3698
							1550.73	-36.6907	-36.9494	-36.8834	-36.9728	-37.0496	-37.1267	-37.1914	-37.4156	-37.4622	-38.2233	-37.7146	-38.2296	-38.8555	-39.0782	-39.434	-39.2563	-40.5263	-43.3422
							1550.74	-36.6857	-36.9432	-36.8779	-36.9669	-37.0434	-37.1201	-37.1846	-37.4079	-37.4543	-38.2109	-37.7054	-38.218	-38.84	-39.0626	-39.4165	-39.2389	-40.5026	-43.3146
							1550.74	-36.6808	-36.9369	-36.8724	-36.961	-37.0372	-37.1135	-37.1778	-37.4002	-37.4463	-38.1985	-37.6963	-38.2064	-38.8246	-39.0471	-39.3991	-39.2217	-40.479	-43.287
							1550.75	-36.6759	-36.9307	-36.8669	-36.9552	-37.031	-37.107	-37.171	-37.3926	-37.4384	-38.1862	-37.6872	-38.1948	-38.8092	-39.0317	-39.3818	-39.2046	-40.4556	-43.2594
							1550.76	-36.6711	-36.9246	-36.8615	-36.9494	-37.0249	-37.1005	-37.1643	-37.385	-37.4306	-38.1739	-37.6781	-38.1833	-38.7939	-39.0163	-39.3646	-39.1876	-40.4324	-43.2319
							1550.77	-36.6663	-36.9184	-36.8561	-36.9436	-37.0188	-37.094	-37.1576	-37.3774	-37.4228	-38.1617	-37.6691	-38.1718	-38.7787	-39.0011	-39.3475	-39.1708	-40.4093	-43.2044
							1550.78	-36.6614	-36.9123	-36.8508	-36.9378	-37.0127	-37.0876	-37.1509	-37.3699	-37.415	-38.1496	-37.6602	-38.1605	-38.7635	-38.9858	-39.3305	-39.154	-40.3863	-43.1769
							1550.78	-36.6567	-36.9063	-36.8454	-36.9321	-37.0066	-37.0811	-37.1443	-37.3624	-37.4073	-38.1375	-37.6512	-38.1491	-38.7485	-38.9707	-39.3136	-39.1373	-40.3634	-43.1495
							1550.79	-36.6519	-36.9002	-36.8401	-36.9264	-37.0006	-37.0748	-37.1376	-37.355	-37.3996	-38.1254	-37.6424	-38.1378	-38.7335	-38.9557	-39.2967	-39.1207	-40.3407	-43.1221
							1550.8	-36.6472	-36.8942	-36.8348	-36.9207	-36.9946	-37.0684	-37.1311	-37.3475	-37.3919	-38.1135	-37.6335	-38.1266	-38.7185	-38.9407	-39.28	-39.1042	-40.3181	-43.0947
							1550.81	-36.6425	-36.8882	-36.8296	-36.9151	-36.9887	-37.0621	-37.1245	-37.3402	-37.3843	-38.1015	-37.6247	-38.1154	-38.7036	-38.9258	-39.2633	-39.0878	-40.2957	-43.0673
							1550.82	-36.6378	-36.8823	-36.8243	-36.9094	-36.9827	-37.0558	-37.118	-37.3328	-37.3767	-38.0897	-37.616	-38.1043	-38.6888	-38.9109	-39.2467	-39.0715	-40.2734	-43.04
							1550.82	-36.6331	-36.8764	-36.8191	-36.9039	-36.9768	-37.0496	-37.1115	-37.3255	-37.3691	-38.0778	-37.6073	-38.0932	-38.6741	-38.8962	-39.2302	-39.0553	-40.2512	-43.0128
							1550.83	-36.6285	-36.8705	-36.8139	-36.8983	-36.971	-37.0433	-37.105	-37.3182	-37.3616	-38.0661	-37.5986	-38.0822	-38.6594	-38.8815	-39.2138	-39.0392	-40.2291	-42.9855
							1550.84	-36.6239	-36.8646	-36.8088	-36.8928	-36.9651	-37.0371	-37.0986	-37.3109	-37.3541	-38.0544	-37.59	-38.0712	-38.6448	-38.8669	-39.1974	-39.0232	-40.2072	-42.9583
							1550.85	-36.6193	-36.8588	-36.8037	-36.8873	-36.9593	-37.031	-37.0922	-37.3037	-37.3466	-38.0427	-37.5815	-38.0603	-38.6302	-38.8523	-39.1812	-39.0073	-40.1854	-42.9312
							1550.86	-36.6147	-36.853	-36.7986	-36.8818	-36.9535	-37.0248	-37.0858	-37.2965	-37.3392	-38.0311	-37.5729	-38.0494	-38.6157	-38.8378	-39.165	-38.9915	-40.1637	-42.9041
							1550.86	-36.6102	-36.8472	-36.7935	-36.8763	-36.9478	-37.0187	-37.0795	-37.2894	-37.3318	-38.0195	-37.5644	-38.0386	-38.6013	-38.8234	-39.1489	-38.9758	-40.1421	-42.877
							1550.87	-36.6057	-36.8415	-36.7885	-36.8709	-36.942	-37.0126	-37.0732	-37.2822	-37.3245	-38.008	-37.556	-38.0278	-38.5869	-38.8091	-39.1329	-38.9602	-40.1207	-42.85
							1550.88	-36.6012	-36.8358	-36.7834	-36.8655	-36.9364	-37.0066	-37.0669	-37.2751	-37.3171	-37.9966	-37.5476	-38.0171	-38.5727	-38.7948	-39.117	-38.9447	-40.0993	-42.8231
							1550.89	-36.5967	-36.8301	-36.7784	-36.8602	-36.9307	-37.0006	-37.0606	-37.2681	-37.3099	-37.9852	-37.5392	-38.0064	-38.5584	-38.7806	-39.1012	-38.9293	-40.0782	-42.7961
							1550.9	-36.5923	-36.8244	-36.7735	-36.8548	-36.925	-36.9946	-37.0544	-37.2611	-37.3026	-37.9739	-37.5309	-37.9958	-38.5443	-38.7665	-39.0854	-38.914	-40.0571	-42.7693
							1550.9	-36.5879	-36.8188	-36.7685	-36.8495	-36.9194	-36.9886	-37.0482	-37.2541	-37.2954	-37.9626	-37.5226	-37.9852	-38.5302	-38.7525	-39.0697	-38.8988	-40.0361	-42.7424
							1550.91	-36.5835	-36.8132	-36.7636	-36.8442	-36.9139	-36.9827	-37.0421	-37.2471	-37.2882	-37.9513	-37.5144	-37.9747	-38.5161	-38.7385	-39.0541	-38.8836	-40.0153	-42.7157
							1550.92	-36.5791	-36.8077	-36.7587	-36.839	-36.9083	-36.9768	-37.0359	-37.2402	-37.281	-37.9401	-37.5062	-37.9643	-38.5021	-38.7245	-39.0386	-38.8686	-39.9945	-42.6889
							1550.93	-36.5748	-36.8021	-36.7539	-36.8338	-36.9028	-36.971	-37.0298	-37.2333	-37.2739	-37.929	-37.498	-37.9539	-38.4882	-38.7107	-39.0231	-38.8537	-39.9739	-42.6623
							1550.94	-36.5704	-36.7966	-36.749	-36.8286	-36.8973	-36.9651	-37.0238	-37.2264	-37.2668	-37.9179	-37.4899	-37.9435	-38.4743	-38.6969	-39.0077	-38.8388	-39.9534	-42.6357
							1550.94	-36.5661	-36.7912	-36.7442	-36.8234	-36.8918	-36.9593	-37.0177	-37.2196	-37.2598	-37.9069	-37.4818	-37.9332	-38.4605	-38.6832	-38.9924	-38.8241	-39.9331	-42.6091
							1550.95	-36.5619	-36.7857	-36.7394	-36.8182	-36.8864	-36.9535	-37.0117	-37.2128	-37.2527	-37.8959	-37.4738	-37.9229	-38.4468	-38.6695	-38.9772	-38.8094	-39.9128	-42.5826
							1550.96	-36.5576	-36.7803	-36.7346	-36.8131	-36.881	-36.9478	-37.0057	-37.206	-37.2458	-37.885	-37.4658	-37.9127	-38.4331	-38.6559	-38.9621	-38.7948	-39.8927	-42.5561
							1550.97	-36.5534	-36.7749	-36.7299	-36.808	-36.8756	-36.9421	-36.9998	-37.1992	-37.2388	-37.8741	-37.4578	-37.9025	-38.4195	-38.6424	-38.947	-38.7803	-39.8726	-42.5297
							1550.98	-36.5492	-36.7695	-36.7252	-36.8029	-36.8703	-36.9364	-36.9938	-37.1925	-37.2319	-37.8632	-37.4499	-37.8924	-38.406	-38.6289	-38.932	-38.7659	-39.8527	-42.5034
							1550.98	-36.545	-36.7642	-36.7205	-36.7979	-36.8649	-36.9307	-36.9879	-37.1858	-37.225	-37.8525	-37.442	-37.8823	-38.3925	-38.6155	-38.917	-38.7516	-39.8329	-42.4771
							1550.99	-36.5408	-36.7589	-36.7158	-36.7929	-36.8596	-36.9251	-36.9821	-37.1792	-37.2181	-37.8417	-37.4341	-37.8723	-38.379	-38.6022	-38.9022	-38.7374	-39.8132	-42.4509
							1551	-36.5367	-36.7536	-36.7112	-36.7879	-36.8544	-36.9195	-36.9762	-37.1726	-37.2113	-37.831	-37.4263	-37.8623	-38.3656	-38.5889	-38.8874	-38.7232	-39.7936	-42.4247
							1551.01	-36.5326	-36.7484	-36.7065	-36.7829	-36.8491	-36.9139	-36.9704	-37.166	-37.2045	-37.8204	-37.4185	-37.8524	-38.3523	-38.5757	-38.8727	-38.7092	-39.7741	-42.3986
							1551.02	-36.5285	-36.7431	-36.7019	-36.778	-36.8439	-36.9084	-36.9647	-37.1594	-37.1977	-37.8098	-37.4108	-37.8425	-38.3391	-38.5625	-38.858	-38.6952	-39.7547	-42.3726
							1551.02	-36.5244	-36.7379	-36.6974	-36.7731	-36.8387	-36.9029	-36.9589	-37.1529	-37.1909	-37.7992	-37.4031	-37.8327	-38.3259	-38.5494	-38.8434	-38.6813	-39.7354	-42.3466
							1551.03	-36.5204	-36.7328	-36.6928	-36.7682	-36.8335	-36.8974	-36.9532	-37.1464	-37.1842	-37.7887	-37.3954	-37.8229	-38.3127	-38.5364	-38.8289	-38.6675	-39.7163	-42.3207
							1551.04	-36.5163	-36.7276	-36.6883	-36.7633	-36.8284	-36.8919	-36.9475	-37.1399	-37.1776	-37.7783	-37.3878	-37.8132	-38.2996	-38.5234	-38.8145	-38.6538	-39.6972	-42.2948
							1551.05	-36.5123	-36.7225	-36.6838	-36.7585	-36.8233	-36.8865	-36.9419	-37.1335	-37.1709	-37.7679	-37.3801	-37.8035	-38.2866	-38.5105	-38.8001	-38.6401	-39.6783	-42.269
							1551.06	-36.5084	-36.7174	-36.6793	-36.7537	-36.8182	-36.8811	-36.9362	-37.1271	-37.1643	-37.7575	-37.3726	-37.7938	-38.2736	-38.4977	-38.7858	-38.6265	-39.6594	-42.2433
							1551.06	-36.5044	-36.7124	-36.6748	-36.7489	-36.8132	-36.8757	-36.9306	-37.1207	-37.1577	-37.7472	-37.365	-37.7842	-38.2607	-38.4849	-38.7716	-38.613	-39.6407	-42.2176
							1551.07	-36.5005	-36.7073	-36.6704	-36.7441	-36.8081	-36.8704	-36.925	-37.1143	-37.1512	-37.7369	-37.3575	-37.7747	-38.2478	-38.4722	-38.7574	-38.5996	-39.6221	-42.192
							1551.08	-36.4966	-36.7023	-36.6659	-36.7394	-36.8031	-36.865	-36.9195	-37.108	-37.1446	-37.7267	-37.3501	-37.7652	-38.235	-38.4595	-38.7433	-38.5863	-39.6035	-42.1665
							1551.09	-36.4927	-36.6974	-36.6616	-36.7347	-36.7981	-36.8597	-36.914	-37.1017	-37.1381	-37.7165	-37.3426	-37.7557	-38.2223	-38.4469	-38.7293	-38.573	-39.5851	-42.141
							1551.1	-36.4888	-36.6924	-36.6572	-36.73	-36.7932	-36.8545	-36.9085	-37.0955	-37.1317	-37.7064	-37.3352	-37.7463	-38.2096	-38.4343	-38.7153	-38.5598	-39.5668	-42.1156
							1551.1	-36.485	-36.6875	-36.6528	-36.7253	-36.7882	-36.8492	-36.9031	-37.0892	-37.1253	-37.6963	-37.3279	-37.7369	-38.1969	-38.4219	-38.7014	-38.5467	-39.5485	-42.0903
							1551.11	-36.4811	-36.6826	-36.6485	-36.7207	-36.7833	-36.844	-36.8976	-37.083	-37.1189	-37.6862	-37.3205	-37.7276	-38.1843	-38.4094	-38.6876	-38.5336	-39.5304	-42.065
							1551.12	-36.4773	-36.6777	-36.6442	-36.7161	-36.7785	-36.8388	-36.8922	-37.0769	-37.1125	-37.6762	-37.3132	-37.7183	-38.1718	-38.3971	-38.6738	-38.5206	-39.5124	-42.0398
							1551.13	-36.4736	-36.6729	-36.6399	-36.7115	-36.7736	-36.8337	-36.8869	-37.0707	-37.1061	-37.6663	-37.3059	-37.7091	-38.1593	-38.3847	-38.6601	-38.5077	-39.4945	-42.0146
							1551.14	-36.4698	-36.668	-36.6356	-36.7069	-36.7688	-36.8285	-36.8815	-37.0646	-37.0998	-37.6564	-37.2987	-37.6999	-38.1469	-38.3725	-38.6464	-38.4949	-39.4767	-41.9896
							1551.14	-36.4661	-36.6632	-36.6314	-36.7023	-36.764	-36.8234	-36.8762	-37.0585	-37.0936	-37.6465	-37.2915	-37.6907	-38.1345	-38.3603	-38.6328	-38.4821	-39.4589	-41.9646
							1551.15	-36.4624	-36.6585	-36.6272	-36.6978	-36.7592	-36.8184	-36.8709	-37.0525	-37.0873	-37.6367	-37.2843	-37.6816	-38.1222	-38.3481	-38.6193	-38.4694	-39.4413	-41.9396
							1551.16	-36.4587	-36.6537	-36.623	-36.6933	-36.7544	-36.8133	-36.8656	-37.0464	-37.0811	-37.6269	-37.2772	-37.6726	-38.11	-38.3361	-38.6059	-38.4567	-39.4238	-41.9148
							1551.17	-36.455	-36.649	-36.6188	-36.6888	-36.7497	-36.8083	-36.8604	-37.0404	-37.0749	-37.6172	-37.2701	-37.6635	-38.0977	-38.324	-38.5925	-38.4442	-39.4063	-41.89
							1551.18	-36.4513	-36.6443	-36.6147	-36.6844	-36.745	-36.8033	-36.8552	-37.0345	-37.0687	-37.6075	-37.263	-37.6546	-38.0856	-38.3121	-38.5791	-38.4316	-39.389	-41.8652
							1551.18	-36.4477	-36.6396	-36.6105	-36.6799	-36.7403	-36.7983	-36.85	-37.0285	-37.0626	-37.5978	-37.2559	-37.6456	-38.0735	-38.3001	-38.5659	-38.4192	-39.3718	-41.8406
							1551.19	-36.4441	-36.635	-36.6064	-36.6755	-36.7356	-36.7933	-36.8449	-37.0226	-37.0565	-37.5882	-37.2489	-37.6367	-38.0614	-38.2883	-38.5527	-38.4068	-39.3546	-41.816
							1551.2	-36.4405	-36.6304	-36.6023	-36.6711	-36.731	-36.7884	-36.8398	-37.0167	-37.0505	-37.5786	-37.2419	-37.6279	-38.0494	-38.2765	-38.5395	-38.3945	-39.3376	-41.7915
							1551.21	-36.437	-36.6258	-36.5983	-36.6668	-36.7264	-36.7835	-36.8347	-37.0109	-37.0444	-37.5691	-37.2349	-37.619	-38.0375	-38.2647	-38.5264	-38.3822	-39.3206	-41.767
							1551.22	-36.4334	-36.6212	-36.5942	-36.6624	-36.7218	-36.7786	-36.8296	-37.005	-37.0384	-37.5596	-37.228	-37.6103	-38.0256	-38.253	-38.5134	-38.37	-39.3037	-41.7427
							1551.22	-36.4299	-36.6166	-36.5902	-36.6581	-36.7172	-36.7738	-36.8245	-36.9992	-37.0324	-37.5502	-37.2211	-37.6015	-38.0137	-38.2414	-38.5004	-38.3579	-39.287	-41.7184
							1551.23	-36.4264	-36.6121	-36.5862	-36.6538	-36.7127	-36.7689	-36.8195	-36.9935	-37.0265	-37.5408	-37.2142	-37.5928	-38.0019	-38.2298	-38.4875	-38.3458	-39.2703	-41.6941
							1551.24	-36.4229	-36.6076	-36.5822	-36.6495	-36.7082	-36.7641	-36.8145	-36.9877	-37.0206	-37.5314	-37.2074	-37.5842	-37.9902	-38.2183	-38.4747	-38.3338	-39.2537	-41.67
							1551.25	-36.4195	-36.6032	-36.5782	-36.6453	-36.7037	-36.7594	-36.8096	-36.982	-37.0147	-37.5221	-37.2006	-37.5756	-37.9785	-38.2068	-38.4619	-38.3218	-39.2372	-41.6459
							1551.26	-36.416	-36.5987	-36.5743	-36.6411	-36.6992	-36.7546	-36.8046	-36.9763	-37.0088	-37.5128	-37.1938	-37.567	-37.9669	-38.1954	-38.4491	-38.3099	-39.2207	-41.6219
							1551.26	-36.4126	-36.5943	-36.5704	-36.6368	-36.6947	-36.7499	-36.7997	-36.9706	-37.003	-37.5035	-37.1871	-37.5584	-37.9553	-38.184	-38.4365	-38.2981	-39.2044	-41.5979
							1551.27	-36.4092	-36.5899	-36.5665	-36.6327	-36.6903	-36.7451	-36.7948	-36.965	-36.9972	-37.4943	-37.1803	-37.5499	-37.9437	-38.1727	-38.4239	-38.2863	-39.1882	-41.5741
							1551.28	-36.4059	-36.5855	-36.5626	-36.6285	-36.6859	-36.7405	-36.79	-36.9594	-36.9914	-37.4852	-37.1737	-37.5415	-37.9322	-38.1614	-38.4113	-38.2745	-39.172	-41.5503
							1551.29	-36.4025	-36.5811	-36.5587	-36.6243	-36.6815	-36.7358	-36.7851	-36.9538	-36.9857	-37.476	-37.167	-37.5331	-37.9208	-38.1502	-38.3988	-38.2628	-39.156	-41.5265
							1551.3	-36.3992	-36.5768	-36.5549	-36.6202	-36.6771	-36.7312	-36.7803	-36.9483	-36.98	-37.4669	-37.1604	-37.5247	-37.9094	-38.139	-38.3864	-38.2512	-39.14	-41.5029
							1551.3	-36.3959	-36.5725	-36.5511	-36.6161	-36.6728	-36.7265	-36.7755	-36.9427	-36.9743	-37.4579	-37.1538	-37.5163	-37.8981	-38.1279	-38.374	-38.2396	-39.1241	-41.4793
							1551.31	-36.3926	-36.5682	-36.5473	-36.612	-36.6685	-36.7219	-36.7708	-36.9372	-36.9686	-37.4489	-37.1472	-37.508	-37.8868	-38.1168	-38.3617	-38.2281	-39.1083	-41.4558
							1551.32	-36.3893	-36.564	-36.5435	-36.608	-36.6642	-36.7174	-36.766	-36.9318	-36.963	-37.4399	-37.1406	-37.4997	-37.8755	-38.1058	-38.3494	-38.2167	-39.0925	-41.4324
							1551.33	-36.386	-36.5597	-36.5397	-36.6039	-36.6599	-36.7128	-36.7613	-36.9263	-36.9574	-37.431	-37.1341	-37.4915	-37.8643	-38.0949	-38.3372	-38.2052	-39.0769	-41.409
							1551.34	-36.3828	-36.5555	-36.536	-36.5999	-36.6557	-36.7083	-36.7566	-36.9209	-36.9518	-37.4221	-37.1276	-37.4833	-37.8532	-38.084	-38.325	-38.1939	-39.0613	-41.3857
							1551.34	-36.3796	-36.5513	-36.5323	-36.5959	-36.6514	-36.7038	-36.752	-36.9155	-36.9463	-37.4132	-37.1212	-37.4751	-37.8421	-38.0731	-38.3129	-38.1826	-39.0458	-41.3625
							1551.35	-36.3764	-36.5472	-36.5286	-36.5919	-36.6472	-36.6993	-36.7473	-36.9102	-36.9408	-37.4044	-37.1148	-37.467	-37.831	-38.0623	-38.3009	-38.1713	-39.0304	-41.3394
							1551.36	-36.3732	-36.543	-36.5249	-36.588	-36.643	-36.6948	-36.7427	-36.9048	-36.9353	-37.3956	-37.1084	-37.4589	-37.82	-38.0516	-38.2889	-38.1601	-39.0151	-41.3163
							1551.37	-36.3701	-36.5389	-36.5212	-36.5841	-36.6389	-36.6904	-36.7381	-36.8995	-36.9298	-37.3869	-37.102	-37.4509	-37.809	-38.0408	-38.277	-38.149	-38.9999	-41.2933
							1551.38	-36.3669	-36.5348	-36.5176	-36.5801	-36.6347	-36.686	-36.7335	-36.8942	-36.9244	-37.3781	-37.0957	-37.4428	-37.7981	-38.0302	-38.2651	-38.1379	-38.9847	-41.2704
							1551.38	-36.3638	-36.5307	-36.514	-36.5763	-36.6306	-36.6816	-36.729	-36.8889	-36.919	-37.3695	-37.0894	-37.4349	-37.7873	-38.0196	-38.2533	-38.1268	-38.9696	-41.2476
							1551.39	-36.3607	-36.5267	-36.5104	-36.5724	-36.6265	-36.6772	-36.7244	-36.8837	-36.9136	-37.3608	-37.0831	-37.4269	-37.7764	-38.009	-38.2415	-38.1158	-38.9546	-41.2248
							1551.4	-36.3576	-36.5226	-36.5068	-36.5685	-36.6224	-36.6729	-36.7199	-36.8785	-36.9083	-37.3522	-37.0768	-37.419	-37.7657	-37.9985	-38.2298	-38.1049	-38.9397	-41.2021
							1551.41	-36.3546	-36.5186	-36.5033	-36.5647	-36.6184	-36.6685	-36.7154	-36.8733	-36.9029	-37.3437	-37.0706	-37.4111	-37.7549	-37.988	-38.2181	-38.0939	-38.9248	-41.1795
							1551.42	-36.3515	-36.5146	-36.4997	-36.5609	-36.6143	-36.6642	-36.711	-36.8681	-36.8976	-37.3351	-37.0644	-37.4033	-37.7443	-37.9776	-38.2065	-38.0831	-38.91	-41.157
							1551.42	-36.3485	-36.5107	-36.4962	-36.5571	-36.6103	-36.6599	-36.7065	-36.863	-36.8924	-37.3267	-37.0582	-37.3954	-37.7336	-37.9673	-38.195	-38.0723	-38.8953	-41.1345
							1551.43	-36.3455	-36.5067	-36.4927	-36.5533	-36.6063	-36.6557	-36.7021	-36.8579	-36.8871	-37.3182	-37.0521	-37.3877	-37.723	-37.9569	-38.1835	-38.0615	-38.8807	-41.1121
							1551.44	-36.3425	-36.5028	-36.4892	-36.5496	-36.6023	-36.6514	-36.6977	-36.8528	-36.8819	-37.3098	-37.046	-37.3799	-37.7125	-37.9467	-38.172	-38.0508	-38.8661	-41.0898
							1551.45	-36.3396	-36.4989	-36.4858	-36.5459	-36.5984	-36.6472	-36.6934	-36.8477	-36.8767	-37.3014	-37.0399	-37.3722	-37.702	-37.9364	-38.1606	-38.0402	-38.8516	-41.0675
							1551.46	-36.3366	-36.4951	-36.4823	-36.5421	-36.5944	-36.643	-36.689	-36.8427	-36.8716	-37.293	-37.0339	-37.3645	-37.6915	-37.9263	-38.1493	-38.0296	-38.8372	-41.0454
							1551.46	-36.3337	-36.4912	-36.4789	-36.5385	-36.5905	-36.6388	-36.6847	-36.8377	-36.8664	-37.2847	-37.0278	-37.3569	-37.6811	-37.9161	-38.138	-38.019	-38.8229	-41.0233
							1551.47	-36.3308	-36.4874	-36.4755	-36.5348	-36.5866	-36.6347	-36.6804	-36.8327	-36.8613	-37.2764	-37.0219	-37.3493	-37.6708	-37.906	-38.1268	-38.0085	-38.8086	-41.0013
							1551.48	-36.3279	-36.4836	-36.4721	-36.5311	-36.5828	-36.6305	-36.6761	-36.8277	-36.8563	-37.2682	-37.0159	-37.3417	-37.6604	-37.896	-38.1156	-37.998	-38.7944	-40.9793
							1551.49	-36.325	-36.4798	-36.4688	-36.5275	-36.5789	-36.6264	-36.6718	-36.8228	-36.8512	-37.26	-37.01	-37.3342	-37.6502	-37.886	-38.1045	-37.9876	-38.7803	-40.9574
							1551.5	-36.3221	-36.476	-36.4654	-36.5239	-36.5751	-36.6223	-36.6676	-36.8179	-36.8462	-37.2518	-37.0041	-37.3267	-37.6399	-37.8761	-38.0934	-37.9773	-38.7662	-40.9356
							1551.5	-36.3193	-36.4723	-36.4621	-36.5203	-36.5713	-36.6182	-36.6633	-36.813	-36.8412	-37.2437	-36.9982	-37.3192	-37.6297	-37.8661	-38.0824	-37.967	-38.7522	-40.9139
							1551.51	-36.3165	-36.4685	-36.4588	-36.5168	-36.5675	-36.6142	-36.6591	-36.8081	-36.8362	-37.2356	-36.9923	-37.3117	-37.6196	-37.8563	-38.0714	-37.9567	-38.7383	-40.8923
							1551.52	-36.3137	-36.4648	-36.4555	-36.5132	-36.5637	-36.6102	-36.655	-36.8033	-36.8312	-37.2275	-36.9865	-37.3043	-37.6095	-37.8465	-38.0605	-37.9465	-38.7244	-40.8707
							1551.53	-36.3109	-36.4612	-36.4523	-36.5097	-36.56	-36.6061	-36.6508	-36.7985	-36.8263	-37.2195	-36.9807	-37.297	-37.5994	-37.8367	-38.0496	-37.9363	-38.7106	-40.8492
							1551.54	-36.3081	-36.4575	-36.449	-36.5062	-36.5562	-36.6022	-36.6467	-36.7937	-36.8214	-37.2115	-36.9749	-37.2896	-37.5894	-37.827	-38.0388	-37.9262	-38.6969	-40.8278
							1551.54	-36.3054	-36.4539	-36.4458	-36.5027	-36.5525	-36.5982	-36.6425	-36.7889	-36.8165	-37.2035	-36.9692	-37.2823	-37.5795	-37.8173	-38.028	-37.9161	-38.6832	-40.8064
							1551.55	-36.3026	-36.4503	-36.4426	-36.4992	-36.5488	-36.5942	-36.6384	-36.7841	-36.8117	-37.1956	-36.9635	-37.275	-37.5695	-37.8076	-38.0173	-37.9061	-38.6697	-40.7852
							1551.56	-36.2999	-36.4467	-36.4394	-36.4958	-36.5452	-36.5903	-36.6344	-36.7794	-36.8068	-37.1877	-36.9578	-37.2678	-37.5596	-37.798	-38.0066	-37.8961	-38.6561	-40.764
							1551.57	-36.2972	-36.4431	-36.4362	-36.4923	-36.5415	-36.5864	-36.6303	-36.7747	-36.802	-37.1798	-36.9522	-37.2606	-37.5498	-37.7885	-37.996	-37.8861	-38.6427	-40.7428
							1551.58	-36.2945	-36.4396	-36.4331	-36.4889	-36.5379	-36.5825	-36.6263	-36.77	-36.7972	-37.172	-36.9465	-37.2534	-37.54	-37.779	-37.9854	-37.8763	-38.6293	-40.7218
							1551.58	-36.2919	-36.436	-36.4299	-36.4855	-36.5343	-36.5786	-36.6222	-36.7654	-36.7925	-37.1642	-36.9409	-37.2462	-37.5302	-37.7695	-37.9749	-37.8664	-38.6159	-40.7008
							1551.59	-36.2892	-36.4325	-36.4268	-36.4822	-36.5307	-36.5748	-36.6182	-36.7607	-36.7877	-37.1564	-36.9354	-37.2391	-37.5205	-37.7601	-37.9644	-37.8566	-38.6027	-40.6799
							1551.6	-36.2866	-36.429	-36.4237	-36.4788	-36.5271	-36.571	-36.6143	-36.7561	-36.783	-37.1487	-36.9298	-37.232	-37.5108	-37.7507	-37.954	-37.8469	-38.5894	-40.6591
							1551.61	-36.284	-36.4256	-36.4206	-36.4755	-36.5236	-36.5672	-36.6103	-36.7515	-36.7783	-37.141	-36.9243	-37.225	-37.5012	-37.7414	-37.9436	-37.8372	-38.5763	-40.6383
							1551.62	-36.2814	-36.4221	-36.4176	-36.4722	-36.5201	-36.5634	-36.6064	-36.747	-36.7737	-37.1333	-36.9188	-37.218	-37.4916	-37.7321	-37.9333	-37.8275	-38.5632	-40.6177
							1551.62	-36.2788	-36.4187	-36.4145	-36.4689	-36.5166	-36.5596	-36.6024	-36.7424	-36.769	-37.1257	-36.9134	-37.211	-37.4821	-37.7228	-37.923	-37.8179	-38.5502	-40.5971
							1551.63	-36.2762	-36.4153	-36.4115	-36.4656	-36.5131	-36.5559	-36.5985	-36.7379	-36.7644	-37.1181	-36.9079	-37.204	-37.4726	-37.7136	-37.9128	-37.8084	-38.5372	-40.5765
							1551.64	-36.2737	-36.4119	-36.4085	-36.4624	-36.5096	-36.5521	-36.5947	-36.7334	-36.7598	-37.1105	-36.9025	-37.1971	-37.4631	-37.7044	-37.9026	-37.7988	-38.5243	-40.5561
							1551.65	-36.2712	-36.4086	-36.4055	-36.4591	-36.5062	-36.5484	-36.5908	-36.7289	-36.7552	-37.1029	-36.8971	-37.1902	-37.4537	-37.6953	-37.8925	-37.7894	-38.5115	-40.5357
							1551.66	-36.2687	-36.4052	-36.4026	-36.4559	-36.5027	-36.5447	-36.5869	-36.7245	-36.7507	-37.0954	-36.8918	-37.1833	-37.4443	-37.6862	-37.8824	-37.78	-38.4987	-40.5154
							1551.66	-36.2662	-36.4019	-36.3996	-36.4527	-36.4993	-36.5411	-36.5831	-36.72	-36.7461	-37.088	-36.8865	-37.1765	-37.4349	-37.6771	-37.8724	-37.7706	-38.486	-40.4951
							1551.67	-36.2637	-36.3986	-36.3967	-36.4495	-36.4959	-36.5374	-36.5793	-36.7156	-36.7416	-37.0805	-36.8812	-37.1697	-37.4256	-37.6681	-37.8624	-37.7613	-38.4733	-40.475
							1551.68	-36.2612	-36.3953	-36.3938	-36.4464	-36.4925	-36.5338	-36.5755	-36.7112	-36.7371	-37.0731	-36.8759	-37.1629	-37.4164	-37.6591	-37.8524	-37.752	-38.4607	-40.4549
							1551.69	-36.2588	-36.3921	-36.3909	-36.4432	-36.4892	-36.5302	-36.5718	-36.7068	-36.7327	-37.0658	-36.8706	-37.1562	-37.4071	-37.6502	-37.8425	-37.7427	-38.4482	-40.4349
							1551.7	-36.2563	-36.3889	-36.388	-36.4401	-36.4859	-36.5266	-36.568	-36.7025	-36.7282	-37.0584	-36.8654	-37.1495	-37.398	-37.6413	-37.8326	-37.7335	-38.4357	-40.4149
							1551.7	-36.2539	-36.3857	-36.3851	-36.437	-36.4825	-36.5231	-36.5643	-36.6982	-36.7238	-37.0511	-36.8602	-37.1428	-37.3888	-37.6325	-37.8228	-37.7244	-38.4233	-40.3951
							1551.71	-36.2515	-36.3825	-36.3823	-36.4339	-36.4792	-36.5195	-36.5606	-36.6939	-36.7194	-37.0438	-36.8551	-37.1362	-37.3797	-37.6236	-37.8131	-37.7153	-38.4109	-40.3753
							1551.72	-36.2491	-36.3793	-36.3795	-36.4309	-36.476	-36.516	-36.5569	-36.6896	-36.715	-37.0366	-36.8499	-37.1296	-37.3706	-37.6149	-37.8033	-37.7062	-38.3986	-40.3555
							1551.73	-36.2468	-36.3761	-36.3766	-36.4278	-36.4727	-36.5125	-36.5533	-36.6853	-36.7107	-37.0294	-36.8448	-37.123	-37.3616	-37.6061	-37.7937	-37.6972	-38.3864	-40.3359
							1551.74	-36.2444	-36.373	-36.3739	-36.4248	-36.4695	-36.509	-36.5496	-36.6811	-36.7063	-37.0222	-36.8397	-37.1164	-37.3526	-37.5974	-37.784	-37.6882	-38.3742	-40.3163
							1551.74	-36.2421	-36.3699	-36.3711	-36.4218	-36.4662	-36.5056	-36.546	-36.6769	-36.702	-37.015	-36.8346	-37.1099	-37.3437	-37.5888	-37.7744	-37.6793	-38.362	-40.2968
							1551.75	-36.2398	-36.3668	-36.3683	-36.4188	-36.463	-36.5021	-36.5424	-36.6727	-36.6977	-37.0079	-36.8296	-37.1034	-37.3348	-37.5801	-37.7649	-37.6704	-38.3499	-40.2774
							1551.76	-36.2375	-36.3638	-36.3656	-36.4158	-36.4599	-36.4987	-36.5388	-36.6685	-36.6935	-37.0008	-36.8246	-37.097	-37.3259	-37.5716	-37.7554	-37.6616	-38.3379	-40.258
							1551.77	-36.2352	-36.3607	-36.3629	-36.4129	-36.4567	-36.4953	-36.5352	-36.6644	-36.6892	-36.9938	-36.8196	-37.0906	-37.3171	-37.563	-37.7459	-37.6528	-38.3259	-40.2387
							1551.78	-36.233	-36.3577	-36.3602	-36.4099	-36.4535	-36.4919	-36.5317	-36.6603	-36.685	-36.9868	-36.8146	-37.0842	-37.3083	-37.5545	-37.7365	-37.644	-38.314	-40.2195
							1551.78	-36.2307	-36.3547	-36.3575	-36.407	-36.4504	-36.4886	-36.5281	-36.6562	-36.6808	-36.9798	-36.8097	-37.0778	-37.2995	-37.546	-37.7272	-37.6353	-38.3022	-40.2004
							1551.79	-36.2285	-36.3517	-36.3548	-36.4041	-36.4473	-36.4852	-36.5246	-36.6521	-36.6766	-36.9728	-36.8047	-37.0715	-37.2908	-37.5376	-37.7178	-37.6267	-38.2904	-40.1813
							1551.8	-36.2263	-36.3488	-36.3522	-36.4013	-36.4442	-36.4819	-36.5211	-36.648	-36.6724	-36.9659	-36.7998	-37.0652	-37.2821	-37.5292	-37.7086	-37.618	-38.2786	-40.1623
							1551.81	-36.2241	-36.3458	-36.3495	-36.3984	-36.4411	-36.4786	-36.5177	-36.644	-36.6683	-36.959	-36.795	-37.0589	-37.2735	-37.5209	-37.6993	-37.6095	-38.2669	-40.1433
							1551.82	-36.2219	-36.3429	-36.3469	-36.3955	-36.4381	-36.4753	-36.5142	-36.64	-36.6642	-36.9521	-36.7901	-37.0527	-37.2649	-37.5126	-37.6901	-37.6009	-38.2553	-40.1245
							1551.82	-36.2197	-36.34	-36.3443	-36.3927	-36.435	-36.4721	-36.5108	-36.636	-36.6601	-36.9453	-36.7853	-37.0465	-37.2563	-37.5043	-37.681	-37.5924	-38.2437	-40.1057
							1551.83	-36.2176	-36.3371	-36.3417	-36.3899	-36.432	-36.4688	-36.5074	-36.632	-36.656	-36.9385	-36.7805	-37.0403	-37.2478	-37.496	-37.6718	-37.584	-38.2322	-40.087
							1551.84	-36.2155	-36.3343	-36.3392	-36.3871	-36.429	-36.4656	-36.504	-36.628	-36.6519	-36.9317	-36.7757	-37.0342	-37.2393	-37.4878	-37.6628	-37.5756	-38.2207	-40.0683
							1551.85	-36.2133	-36.3315	-36.3366	-36.3844	-36.426	-36.4624	-36.5006	-36.6241	-36.6479	-36.925	-36.771	-37.028	-37.2309	-37.4797	-37.6537	-37.5672	-38.2093	-40.0497
							1551.86	-36.2112	-36.3286	-36.3341	-36.3816	-36.423	-36.4592	-36.4972	-36.6202	-36.6439	-36.9183	-36.7662	-37.022	-37.2225	-37.4715	-37.6448	-37.5588	-38.1979	-40.0312
							1551.86	-36.2092	-36.3259	-36.3316	-36.3789	-36.4201	-36.4561	-36.4939	-36.6163	-36.6399	-36.9116	-36.7615	-37.0159	-37.2141	-37.4634	-37.6358	-37.5505	-38.1866	-40.0128
							1551.87	-36.2071	-36.3231	-36.3291	-36.3762	-36.4171	-36.4529	-36.4906	-36.6125	-36.6359	-36.905	-36.7568	-37.0099	-37.2058	-37.4554	-37.6269	-37.5423	-38.1753	-39.9944
							1551.88	-36.2051	-36.3203	-36.3266	-36.3735	-36.4142	-36.4498	-36.4873	-36.6086	-36.632	-36.8984	-36.7522	-37.0039	-37.1975	-37.4474	-37.618	-37.5341	-38.1641	-39.9761
							1551.89	-36.203	-36.3176	-36.3242	-36.3708	-36.4113	-36.4467	-36.484	-36.6048	-36.628	-36.8918	-36.7476	-36.9979	-37.1892	-37.4394	-37.6092	-37.5259	-38.1529	-39.9579
							1551.9	-36.201	-36.3149	-36.3217	-36.3681	-36.4084	-36.4436	-36.4807	-36.601	-36.6241	-36.8852	-36.7429	-36.992	-37.181	-37.4314	-37.6004	-37.5178	-38.1418	-39.9397
							1551.9	-36.199	-36.3122	-36.3193	-36.3655	-36.4055	-36.4406	-36.4775	-36.5972	-36.6202	-36.8787	-36.7383	-36.9861	-37.1728	-37.4235	-37.5917	-37.5097	-38.1308	-39.9216
							1551.91	-36.197	-36.3096	-36.3169	-36.3628	-36.4027	-36.4375	-36.4743	-36.5935	-36.6163	-36.8722	-36.7338	-36.9802	-37.1646	-37.4156	-37.583	-37.5016	-38.1198	-39.9036
							1551.92	-36.1951	-36.3069	-36.3145	-36.3602	-36.3999	-36.4345	-36.4711	-36.5897	-36.6125	-36.8657	-36.7292	-36.9744	-37.1565	-37.4078	-37.5743	-37.4936	-38.1088	-39.8856
							1551.93	-36.1931	-36.3043	-36.3121	-36.3576	-36.397	-36.4315	-36.4679	-36.586	-36.6087	-36.8593	-36.7247	-36.9686	-37.1485	-37.4	-37.5657	-37.4856	-38.0979	-39.8678
							1551.94	-36.1912	-36.3017	-36.3098	-36.3551	-36.3942	-36.4285	-36.4647	-36.5823	-36.6049	-36.8529	-36.7202	-36.9628	-37.1404	-37.3922	-37.5571	-37.4776	-38.087	-39.8499
							1551.94	-36.1893	-36.2991	-36.3074	-36.3525	-36.3914	-36.4255	-36.4616	-36.5786	-36.6011	-36.8466	-36.7157	-36.957	-37.1324	-37.3845	-37.5486	-37.4697	-38.0762	-39.8322
							1551.95	-36.1874	-36.2966	-36.3051	-36.35	-36.3887	-36.4226	-36.4585	-36.575	-36.5973	-36.8402	-36.7113	-36.9513	-37.1245	-37.3768	-37.5401	-37.4619	-38.0655	-39.8145
							1551.96	-36.1855	-36.294	-36.3028	-36.3475	-36.3859	-36.4197	-36.4553	-36.5714	-36.5935	-36.8339	-36.7068	-36.9456	-37.1165	-37.3691	-37.5316	-37.454	-38.0548	-39.7969
							1551.97	-36.1837	-36.2915	-36.3005	-36.345	-36.3832	-36.4168	-36.4523	-36.5677	-36.5898	-36.8276	-36.7024	-36.94	-37.1086	-37.3615	-37.5232	-37.4462	-38.0441	-39.7793
							1551.98	-36.1818	-36.289	-36.2983	-36.3425	-36.3805	-36.4139	-36.4492	-36.5642	-36.5861	-36.8214	-36.698	-36.9343	-37.1008	-37.3539	-37.5148	-37.4385	-38.0335	-39.7619
							1551.98	-36.18	-36.2866	-36.296	-36.34	-36.3778	-36.411	-36.4461	-36.5606	-36.5824	-36.8152	-36.6937	-36.9287	-37.0929	-37.3464	-37.5064	-37.4307	-38.023	-39.7445
							1551.99	-36.1782	-36.2841	-36.2938	-36.3376	-36.3751	-36.4081	-36.4431	-36.557	-36.5787	-36.809	-36.6893	-36.9231	-37.0852	-37.3388	-37.4981	-37.4231	-38.0125	-39.7271
							1552	-36.1764	-36.2817	-36.2916	-36.3351	-36.3724	-36.4053	-36.4401	-36.5535	-36.5751	-36.8029	-36.685	-36.9176	-37.0774	-37.3314	-37.4898	-37.4154	-38.002	-39.7098
							1552.01	-36.1746	-36.2793	-36.2894	-36.3327	-36.3698	-36.4025	-36.4371	-36.55	-36.5715	-36.7967	-36.6807	-36.9121	-37.0697	-37.3239	-37.4816	-37.4078	-37.9916	-39.6926
							1552.02	-36.1729	-36.2769	-36.2872	-36.3303	-36.3671	-36.3997	-36.4341	-36.5465	-36.5679	-36.7906	-36.6764	-36.9066	-37.062	-37.3165	-37.4734	-37.4002	-37.9813	-39.6755
							1552.02	-36.1712	-36.2745	-36.2851	-36.328	-36.3645	-36.3969	-36.4312	-36.5431	-36.5643	-36.7846	-36.6721	-36.9011	-37.0544	-37.3091	-37.4653	-37.3926	-37.971	-39.6584
							1552.03	-36.1694	-36.2722	-36.2829	-36.3256	-36.3619	-36.3942	-36.4283	-36.5396	-36.5607	-36.7786	-36.6679	-36.8957	-37.0468	-37.3018	-37.4571	-37.3851	-37.9607	-39.6414
							1552.04	-36.1677	-36.2699	-36.2808	-36.3233	-36.3593	-36.3914	-36.4253	-36.5362	-36.5572	-36.7726	-36.6637	-36.8903	-37.0392	-37.2945	-37.449	-37.3776	-37.9505	-39.6244
							1552.05	-36.166	-36.2676	-36.2787	-36.3209	-36.3568	-36.3887	-36.4224	-36.5328	-36.5536	-36.7666	-36.6595	-36.8849	-37.0317	-37.2872	-37.441	-37.3702	-37.9403	-39.6075
							1552.06	-36.1644	-36.2653	-36.2766	-36.3186	-36.3542	-36.386	-36.4196	-36.5294	-36.5501	-36.7607	-36.6553	-36.8795	-37.0242	-37.2799	-37.433	-37.3628	-37.9302	-39.5907
							1552.06	-36.1627	-36.263	-36.2745	-36.3163	-36.3517	-36.3833	-36.4167	-36.5261	-36.5466	-36.7547	-36.6512	-36.8742	-37.0167	-37.2727	-37.425	-37.3554	-37.9201	-39.574
							1552.07	-36.1611	-36.2608	-36.2725	-36.3141	-36.3492	-36.3807	-36.4139	-36.5227	-36.5432	-36.7489	-36.647	-36.8689	-37.0093	-37.2655	-37.4171	-37.3481	-37.9101	-39.5573
							1552.08	-36.1595	-36.2586	-36.2704	-36.3118	-36.3467	-36.378	-36.4111	-36.5194	-36.5397	-36.743	-36.6429	-36.8636	-37.0019	-37.2584	-37.4092	-37.3407	-37.9001	-39.5407
							1552.09	-36.1579	-36.2564	-36.2684	-36.3096	-36.3442	-36.3754	-36.4083	-36.5161	-36.5363	-36.7372	-36.6388	-36.8584	-36.9945	-37.2513	-37.4013	-37.3335	-37.8902	-39.5241
							1552.1	-36.1563	-36.2542	-36.2664	-36.3074	-36.3417	-36.3728	-36.4055	-36.5129	-36.5329	-36.7314	-36.6348	-36.8532	-36.9872	-37.2442	-37.3935	-37.3262	-37.8803	-39.5076
							1552.1	-36.1547	-36.252	-36.2644	-36.3052	-36.3393	-36.3702	-36.4027	-36.5096	-36.5295	-36.7257	-36.6307	-36.848	-36.9799	-37.2372	-37.3857	-37.319	-37.8705	-39.4912
							1552.11	-36.1532	-36.2499	-36.2625	-36.303	-36.3368	-36.3676	-36.4	-36.5064	-36.5261	-36.7199	-36.6267	-36.8428	-36.9726	-37.2302	-37.3779	-37.3118	-37.8607	-39.4748
							1552.12	-36.1516	-36.2478	-36.2605	-36.3008	-36.3344	-36.365	-36.3972	-36.5032	-36.5228	-36.7142	-36.6227	-36.8377	-36.9654	-37.2232	-37.3702	-37.3047	-37.8509	-39.4585
							1552.13	-36.1501	-36.2457	-36.2586	-36.2987	-36.332	-36.3625	-36.3945	-36.5	-36.5195	-36.7086	-36.6187	-36.8326	-36.9582	-37.2163	-37.3625	-37.2976	-37.8412	-39.4422
							1552.14	-36.1486	-36.2436	-36.2567	-36.2965	-36.3296	-36.36	-36.3918	-36.4968	-36.5161	-36.7029	-36.6148	-36.8275	-36.951	-37.2094	-37.3549	-37.2905	-37.8315	-39.4261
							1552.14	-36.1471	-36.2416	-36.2548	-36.2944	-36.3272	-36.3575	-36.3892	-36.4936	-36.5129	-36.6973	-36.6108	-36.8225	-36.9439	-37.2025	-37.3473	-37.2834	-37.8219	-39.41
							1552.15	-36.1456	-36.2395	-36.2529	-36.2923	-36.3249	-36.355	-36.3865	-36.4905	-36.5096	-36.6918	-36.6069	-36.8174	-36.9368	-37.1957	-37.3397	-37.2764	-37.8124	-39.3939
							1552.16	-36.1442	-36.2375	-36.2511	-36.2903	-36.3226	-36.3525	-36.3839	-36.4874	-36.5063	-36.6862	-36.603	-36.8124	-36.9297	-37.1889	-37.3321	-37.2694	-37.8028	-39.3779
							1552.17	-36.1428	-36.2355	-36.2492	-36.2882	-36.3202	-36.3501	-36.3813	-36.4843	-36.5031	-36.6807	-36.5991	-36.8074	-36.9227	-37.1821	-37.3246	-37.2625	-37.7933	-39.362
							1552.18	-36.1413	-36.2336	-36.2474	-36.2862	-36.3179	-36.3476	-36.3787	-36.4812	-36.4999	-36.6752	-36.5953	-36.8025	-36.9157	-37.1753	-37.3172	-37.2555	-37.7839	-39.3461
							1552.18	-36.1399	-36.2316	-36.2456	-36.2841	-36.3157	-36.3452	-36.3761	-36.4781	-36.4967	-36.6697	-36.5915	-36.7976	-36.9088	-37.1686	-37.3097	-37.2487	-37.7745	-39.3303
							1552.19	-36.1386	-36.2297	-36.2438	-36.2821	-36.3134	-36.3428	-36.3736	-36.4751	-36.4935	-36.6643	-36.5877	-36.7927	-36.9018	-37.162	-37.3023	-37.2418	-37.7651	-39.3145
							1552.2	-36.1372	-36.2278	-36.2421	-36.2801	-36.3112	-36.3405	-36.371	-36.4721	-36.4904	-36.6589	-36.5839	-36.7878	-36.895	-37.1553	-37.2949	-37.235	-37.7558	-39.2989
							1552.21	-36.1358	-36.2259	-36.2403	-36.2782	-36.3089	-36.3381	-36.3685	-36.4691	-36.4872	-36.6536	-36.5801	-36.783	-36.8881	-37.1487	-37.2876	-37.2282	-37.7466	-39.2832
							1552.22	-36.1345	-36.2241	-36.2386	-36.2762	-36.3067	-36.3358	-36.366	-36.4661	-36.4841	-36.6482	-36.5763	-36.7781	-36.8813	-37.1421	-37.2803	-37.2214	-37.7373	-39.2677
							1552.22	-36.1332	-36.2222	-36.2369	-36.2743	-36.3045	-36.3334	-36.3635	-36.4632	-36.481	-36.6429	-36.5726	-36.7734	-36.8745	-37.1356	-37.273	-37.2147	-37.7282	-39.2522
							1552.23	-36.1319	-36.2204	-36.2352	-36.2724	-36.3023	-36.3311	-36.3611	-36.4602	-36.4779	-36.6376	-36.5689	-36.7686	-36.8677	-37.1291	-37.2658	-37.208	-37.719	-39.2367
							1552.24	-36.1306	-36.2186	-36.2335	-36.2705	-36.3002	-36.3288	-36.3586	-36.4573	-36.4749	-36.6324	-36.5652	-36.7638	-36.861	-37.1226	-37.2586	-37.2013	-37.7099	-39.2213
							1552.25	-36.1293	-36.2168	-36.2318	-36.2686	-36.298	-36.3266	-36.3562	-36.4544	-36.4718	-36.6271	-36.5616	-36.7591	-36.8543	-37.1161	-37.2514	-37.1947	-37.7009	-39.206
							1552.26	-36.1281	-36.215	-36.2302	-36.2667	-36.2959	-36.3243	-36.3538	-36.4515	-36.4688	-36.622	-36.5579	-36.7544	-36.8476	-37.1097	-37.2443	-37.188	-37.6918	-39.1908
							1552.26	-36.1269	-36.2133	-36.2286	-36.2649	-36.2938	-36.3221	-36.3514	-36.4486	-36.4658	-36.6168	-36.5543	-36.7498	-36.841	-37.1033	-37.2372	-37.1815	-37.6829	-39.1756
							1552.27	-36.1256	-36.2116	-36.227	-36.263	-36.2917	-36.3198	-36.349	-36.4458	-36.4628	-36.6117	-36.5507	-36.7451	-36.8344	-37.097	-37.2301	-37.1749	-37.6739	-39.1604
							1552.28	-36.1244	-36.2099	-36.2254	-36.2612	-36.2896	-36.3176	-36.3467	-36.443	-36.4598	-36.6066	-36.5471	-36.7405	-36.8278	-37.0907	-37.2231	-37.1684	-37.665	-39.1453
							1552.29	-36.1232	-36.2082	-36.2238	-36.2594	-36.2876	-36.3154	-36.3443	-36.4402	-36.4569	-36.6015	-36.5436	-36.7359	-36.8213	-37.0844	-37.2161	-37.1619	-37.6562	-39.1303
							1552.3	-36.1221	-36.2065	-36.2223	-36.2576	-36.2855	-36.3133	-36.342	-36.4374	-36.4539	-36.5964	-36.54	-36.7313	-36.8148	-37.0781	-37.2091	-37.1554	-37.6474	-39.1153
							1552.3	-36.1209	-36.2049	-36.2207	-36.2559	-36.2835	-36.3111	-36.3397	-36.4346	-36.451	-36.5914	-36.5365	-36.7268	-36.8083	-37.0719	-37.2022	-37.149	-37.6386	-39.1004
							1552.31	-36.1198	-36.2033	-36.2192	-36.2541	-36.2815	-36.309	-36.3374	-36.4318	-36.4481	-36.5864	-36.533	-36.7223	-36.8018	-37.0657	-37.1953	-37.1426	-37.6299	-39.0856
							1552.32	-36.1187	-36.2017	-36.2177	-36.2524	-36.2795	-36.3069	-36.3352	-36.4291	-36.4452	-36.5815	-36.5296	-36.7178	-36.7954	-37.0595	-37.1884	-37.1363	-37.6212	-39.0708
							1552.33	-36.1175	-36.2001	-36.2162	-36.2507	-36.2775	-36.3048	-36.3329	-36.4264	-36.4424	-36.5765	-36.5261	-36.7133	-36.789	-37.0533	-37.1816	-37.1299	-37.6125	-39.056
							1552.34	-36.1165	-36.1985	-36.2148	-36.249	-36.2756	-36.3027	-36.3307	-36.4237	-36.4395	-36.5716	-36.5227	-36.7088	-36.7827	-37.0472	-37.1748	-37.1236	-37.6039	-39.0413
							1552.34	-36.1154	-36.197	-36.2133	-36.2473	-36.2737	-36.3006	-36.3285	-36.421	-36.4367	-36.5667	-36.5193	-36.7044	-36.7764	-37.0412	-37.168	-37.1173	-37.5953	-39.0267
							1552.35	-36.1143	-36.1955	-36.2119	-36.2456	-36.2718	-36.2986	-36.3263	-36.4183	-36.4339	-36.5619	-36.5159	-36.7	-36.7701	-37.0351	-37.1613	-37.1111	-37.5868	-39.0121
							1552.36	-36.1133	-36.194	-36.2105	-36.244	-36.2699	-36.2965	-36.3241	-36.4157	-36.4311	-36.5571	-36.5125	-36.6956	-36.7638	-37.0291	-37.1546	-37.1049	-37.5783	-38.9976
							1552.37	-36.1122	-36.1925	-36.2091	-36.2424	-36.268	-36.2945	-36.322	-36.4131	-36.4283	-36.5523	-36.5092	-36.6913	-36.7576	-37.0231	-37.1479	-37.0987	-37.5698	-38.9832
							1552.38	-36.1112	-36.191	-36.2077	-36.2407	-36.2661	-36.2925	-36.3199	-36.4104	-36.4255	-36.5475	-36.5058	-36.687	-36.7514	-37.0171	-37.1412	-37.0925	-37.5614	-38.9688
							1552.38	-36.1102	-36.1896	-36.2064	-36.2392	-36.2643	-36.2905	-36.3177	-36.4078	-36.4228	-36.5428	-36.5025	-36.6826	-36.7452	-37.0112	-37.1346	-37.0864	-37.553	-38.9544
							1552.39	-36.1092	-36.1881	-36.205	-36.2376	-36.2624	-36.2885	-36.3156	-36.4053	-36.4201	-36.5381	-36.4992	-36.6784	-36.7391	-37.0053	-37.128	-37.0803	-37.5447	-38.9402
							1552.4	-36.1083	-36.1867	-36.2037	-36.236	-36.2606	-36.2866	-36.3136	-36.4027	-36.4174	-36.5334	-36.496	-36.6741	-36.733	-36.9994	-37.1215	-37.0742	-37.5364	-38.9259
							1552.41	-36.1073	-36.1854	-36.2024	-36.2345	-36.2589	-36.2847	-36.3115	-36.4002	-36.4147	-36.5287	-36.4927	-36.6699	-36.7269	-36.9936	-37.115	-37.0682	-37.5281	-38.9117
							1552.42	-36.1064	-36.184	-36.2011	-36.2329	-36.2571	-36.2827	-36.3094	-36.3976	-36.412	-36.5241	-36.4895	-36.6657	-36.7208	-36.9878	-37.1085	-37.0622	-37.5199	-38.8976
							1552.42	-36.1055	-36.1826	-36.1998	-36.2314	-36.2553	-36.2808	-36.3074	-36.3951	-36.4093	-36.5195	-36.4863	-36.6615	-36.7148	-36.982	-37.102	-37.0562	-37.5117	-38.8836
							1552.43	-36.1046	-36.1813	-36.1985	-36.2299	-36.2536	-36.279	-36.3054	-36.3927	-36.4067	-36.5149	-36.4831	-36.6573	-36.7088	-36.9762	-37.0956	-37.0503	-37.5035	-38.8695
							1552.44	-36.1037	-36.18	-36.1973	-36.2284	-36.2519	-36.2771	-36.3034	-36.3902	-36.4041	-36.5104	-36.48	-36.6531	-36.7029	-36.9705	-37.0892	-37.0444	-37.4954	-38.8556
							1552.45	-36.1028	-36.1787	-36.1961	-36.227	-36.2502	-36.2752	-36.3014	-36.3877	-36.4015	-36.5059	-36.4768	-36.649	-36.6969	-36.9648	-37.0828	-37.0385	-37.4873	-38.8417
							1552.46	-36.1019	-36.1774	-36.1949	-36.2255	-36.2485	-36.2734	-36.2995	-36.3853	-36.3989	-36.5014	-36.4737	-36.6449	-36.691	-36.9591	-37.0765	-37.0326	-37.4793	-38.8278
							1552.46	-36.1011	-36.1762	-36.1937	-36.2241	-36.2468	-36.2716	-36.2975	-36.3829	-36.3963	-36.4969	-36.4706	-36.6408	-36.6852	-36.9535	-37.0702	-37.0268	-37.4713	-38.814
							1552.47	-36.1002	-36.1749	-36.1925	-36.2227	-36.2452	-36.2698	-36.2956	-36.3805	-36.3938	-36.4925	-36.4675	-36.6368	-36.6793	-36.9479	-37.0639	-37.021	-37.4633	-38.8003
							1552.48	-36.0994	-36.1737	-36.1913	-36.2213	-36.2436	-36.268	-36.2937	-36.3781	-36.3912	-36.4881	-36.4644	-36.6328	-36.6735	-36.9423	-37.0577	-37.0152	-37.4554	-38.7866
							1552.49	-36.0986	-36.1725	-36.1902	-36.2199	-36.242	-36.2662	-36.2918	-36.3757	-36.3887	-36.4837	-36.4614	-36.6287	-36.6677	-36.9367	-37.0514	-37.0094	-37.4475	-38.773
							1552.5	-36.0978	-36.1713	-36.189	-36.2185	-36.2404	-36.2645	-36.2899	-36.3734	-36.3862	-36.4793	-36.4584	-36.6248	-36.662	-36.9312	-37.0453	-37.0037	-37.4396	-38.7594
							1552.5	-36.0971	-36.1702	-36.1879	-36.2171	-36.2388	-36.2627	-36.288	-36.371	-36.3837	-36.475	-36.4554	-36.6208	-36.6562	-36.9257	-37.0391	-36.998	-37.4318	-38.7459
							1552.51	-36.0963	-36.169	-36.1868	-36.2158	-36.2372	-36.261	-36.2862	-36.3687	-36.3812	-36.4707	-36.4524	-36.6169	-36.6505	-36.9202	-37.033	-36.9924	-37.424	-38.7324
							1552.52	-36.0956	-36.1679	-36.1857	-36.2145	-36.2357	-36.2593	-36.2844	-36.3664	-36.3788	-36.4664	-36.4494	-36.6129	-36.6449	-36.9148	-37.0269	-36.9867	-37.4162	-38.719
							1552.53	-36.0948	-36.1668	-36.1847	-36.2132	-36.2342	-36.2576	-36.2826	-36.3641	-36.3763	-36.4622	-36.4465	-36.609	-36.6392	-36.9094	-37.0208	-36.9811	-37.4085	-38.7056
							1552.54	-36.0941	-36.1657	-36.1836	-36.2119	-36.2327	-36.2559	-36.2808	-36.3619	-36.3739	-36.4579	-36.4436	-36.6052	-36.6336	-36.904	-37.0148	-36.9756	-37.4008	-38.6923
							1552.54	-36.0934	-36.1646	-36.1826	-36.2106	-36.2312	-36.2543	-36.279	-36.3596	-36.3715	-36.4537	-36.4407	-36.6013	-36.628	-36.8986	-37.0087	-36.97	-37.3932	-38.679
							1552.55	-36.0927	-36.1635	-36.1815	-36.2093	-36.2297	-36.2526	-36.2772	-36.3574	-36.3691	-36.4496	-36.4378	-36.5975	-36.6225	-36.8933	-37.0028	-36.9645	-37.3856	-38.6658
							1552.56	-36.092	-36.1625	-36.1805	-36.2081	-36.2283	-36.251	-36.2755	-36.3552	-36.3667	-36.4454	-36.4349	-36.5936	-36.6169	-36.888	-36.9968	-36.959	-37.378	-38.6527
							1552.57	-36.0914	-36.1615	-36.1795	-36.2068	-36.2268	-36.2494	-36.2737	-36.353	-36.3644	-36.4413	-36.432	-36.5899	-36.6114	-36.8827	-36.9909	-36.9535	-37.3705	-38.6395
							1552.58	-36.0907	-36.1605	-36.1786	-36.2056	-36.2254	-36.2478	-36.272	-36.3508	-36.362	-36.4372	-36.4292	-36.5861	-36.606	-36.8774	-36.985	-36.9481	-37.363	-38.6265
							1552.58	-36.0901	-36.1595	-36.1776	-36.2044	-36.224	-36.2462	-36.2703	-36.3486	-36.3597	-36.4331	-36.4264	-36.5823	-36.6005	-36.8722	-36.9791	-36.9427	-37.3555	-38.6135
							1552.59	-36.0895	-36.1585	-36.1767	-36.2032	-36.2227	-36.2447	-36.2687	-36.3465	-36.3574	-36.4291	-36.4236	-36.5786	-36.5951	-36.867	-36.9733	-36.9373	-37.348	-38.6005
							1552.6	-36.0889	-36.1576	-36.1757	-36.202	-36.2213	-36.2431	-36.267	-36.3443	-36.3551	-36.425	-36.4208	-36.5749	-36.5897	-36.8618	-36.9675	-36.9319	-37.3406	-38.5876
							1552.61	-36.0883	-36.1566	-36.1748	-36.2009	-36.22	-36.2416	-36.2653	-36.3422	-36.3528	-36.421	-36.4181	-36.5712	-36.5843	-36.8567	-36.9617	-36.9266	-37.3333	-38.5748
							1552.62	-36.0878	-36.1557	-36.1739	-36.1997	-36.2186	-36.2401	-36.2637	-36.3401	-36.3506	-36.4171	-36.4154	-36.5676	-36.579	-36.8515	-36.9559	-36.9213	-37.3259	-38.562
							1552.62	-36.0872	-36.1548	-36.173	-36.1986	-36.2173	-36.2386	-36.2621	-36.338	-36.3483	-36.4131	-36.4126	-36.5639	-36.5737	-36.8464	-36.9502	-36.916	-37.3186	-38.5492
							1552.63	-36.0867	-36.1539	-36.1721	-36.1975	-36.216	-36.2371	-36.2605	-36.336	-36.3461	-36.4092	-36.4099	-36.5603	-36.5684	-36.8414	-36.9445	-36.9107	-37.3114	-38.5365
							1552.64	-36.0861	-36.1531	-36.1713	-36.1964	-36.2148	-36.2356	-36.2589	-36.3339	-36.3439	-36.4053	-36.4073	-36.5567	-36.5631	-36.8363	-36.9389	-36.9055	-37.3041	-38.5239
							1552.65	-36.0856	-36.1522	-36.1704	-36.1953	-36.2135	-36.2341	-36.2573	-36.3319	-36.3417	-36.4014	-36.4046	-36.5531	-36.5579	-36.8313	-36.9332	-36.9003	-37.2969	-38.5113
							1552.66	-36.0851	-36.1514	-36.1696	-36.1942	-36.2123	-36.2327	-36.2558	-36.3299	-36.3395	-36.3976	-36.4019	-36.5496	-36.5527	-36.8263	-36.9276	-36.8951	-37.2898	-38.4987
							1552.66	-36.0846	-36.1506	-36.1688	-36.1931	-36.211	-36.2313	-36.2542	-36.3279	-36.3374	-36.3937	-36.3993	-36.546	-36.5475	-36.8213	-36.922	-36.8899	-37.2826	-38.4862
							1552.67	-36.0842	-36.1498	-36.168	-36.1921	-36.2098	-36.2299	-36.2527	-36.3259	-36.3352	-36.3899	-36.3967	-36.5425	-36.5424	-36.8164	-36.9165	-36.8848	-37.2755	-38.4738
							1552.68	-36.0837	-36.149	-36.1672	-36.191	-36.2086	-36.2285	-36.2512	-36.324	-36.3331	-36.3862	-36.3941	-36.539	-36.5373	-36.8115	-36.9109	-36.8797	-37.2685	-38.4614
							1552.69	-36.0833	-36.1483	-36.1664	-36.19	-36.2075	-36.2271	-36.2497	-36.322	-36.331	-36.3824	-36.3916	-36.5355	-36.5322	-36.8066	-36.9054	-36.8746	-37.2614	-38.449
							1552.7	-36.0828	-36.1475	-36.1656	-36.189	-36.2063	-36.2257	-36.2482	-36.3201	-36.3289	-36.3787	-36.389	-36.5321	-36.5271	-36.8017	-36.9	-36.8696	-37.2544	-38.4367
							1552.7	-36.0824	-36.1468	-36.1649	-36.188	-36.2052	-36.2244	-36.2467	-36.3182	-36.3268	-36.375	-36.3865	-36.5286	-36.5221	-36.7969	-36.8945	-36.8645	-37.2475	-38.4245
							1552.71	-36.082	-36.1461	-36.1641	-36.1871	-36.204	-36.223	-36.2453	-36.3163	-36.3248	-36.3713	-36.3839	-36.5252	-36.517	-36.7921	-36.8891	-36.8595	-37.2405	-38.4122
							1552.72	-36.0816	-36.1454	-36.1634	-36.1861	-36.2029	-36.2217	-36.2439	-36.3144	-36.3227	-36.3676	-36.3814	-36.5218	-36.512	-36.7873	-36.8837	-36.8545	-37.2336	-38.4001
							1552.73	-36.0813	-36.1447	-36.1627	-36.1851	-36.2018	-36.2204	-36.2424	-36.3125	-36.3207	-36.364	-36.379	-36.5184	-36.5071	-36.7825	-36.8783	-36.8496	-37.2268	-38.388
							1552.74	-36.0809	-36.144	-36.162	-36.1842	-36.2008	-36.2191	-36.241	-36.3107	-36.3187	-36.3603	-36.3765	-36.5151	-36.5021	-36.7778	-36.873	-36.8447	-37.2199	-38.3759
							1552.74	-36.0806	-36.1434	-36.1613	-36.1833	-36.1997	-36.2178	-36.2396	-36.3088	-36.3167	-36.3567	-36.3741	-36.5118	-36.4972	-36.7731	-36.8677	-36.8397	-37.2131	-38.3639
							1552.75	-36.0802	-36.1428	-36.1607	-36.1824	-36.1986	-36.2166	-36.2383	-36.307	-36.3147	-36.3532	-36.3716	-36.5084	-36.4923	-36.7684	-36.8624	-36.8348	-37.2064	-38.352
							1552.76	-36.0799	-36.1422	-36.16	-36.1815	-36.1976	-36.2153	-36.2369	-36.3052	-36.3127	-36.3496	-36.3692	-36.5051	-36.4875	-36.7637	-36.8571	-36.83	-37.1996	-38.34
							1552.77	-36.0796	-36.1416	-36.1594	-36.1806	-36.1966	-36.2141	-36.2355	-36.3034	-36.3108	-36.3461	-36.3668	-36.5019	-36.4827	-36.7591	-36.8519	-36.8251	-37.1929	-38.3282
							1552.78	-36.0793	-36.141	-36.1587	-36.1797	-36.1956	-36.2129	-36.2342	-36.3017	-36.3089	-36.3426	-36.3644	-36.4986	-36.4778	-36.7545	-36.8467	-36.8203	-37.1862	-38.3164
							1552.78	-36.0791	-36.1404	-36.1581	-36.1789	-36.1946	-36.2117	-36.2329	-36.2999	-36.3069	-36.3391	-36.3621	-36.4954	-36.4731	-36.7499	-36.8415	-36.8155	-37.1796	-38.3046
							1552.79	-36.0788	-36.1399	-36.1575	-36.178	-36.1937	-36.2105	-36.2316	-36.2982	-36.305	-36.3357	-36.3597	-36.4922	-36.4683	-36.7453	-36.8364	-36.8107	-37.173	-38.2929
							1552.8	-36.0786	-36.1394	-36.1569	-36.1772	-36.1927	-36.2093	-36.2303	-36.2965	-36.3032	-36.3322	-36.3574	-36.489	-36.4636	-36.7408	-36.8312	-36.806	-37.1664	-38.2812
							1552.81	-36.0783	-36.1388	-36.1564	-36.1764	-36.1918	-36.2081	-36.229	-36.2948	-36.3013	-36.3288	-36.3551	-36.4858	-36.4589	-36.7363	-36.8261	-36.8013	-37.1598	-38.2696
							1552.82	-36.0781	-36.1384	-36.1558	-36.1756	-36.1909	-36.207	-36.2277	-36.2931	-36.2995	-36.3254	-36.3528	-36.4826	-36.4542	-36.7318	-36.8211	-36.7966	-37.1533	-38.258
							1552.82	-36.0779	-36.1379	-36.1553	-36.1748	-36.1899	-36.2058	-36.2265	-36.2914	-36.2976	-36.322	-36.3505	-36.4795	-36.4495	-36.7273	-36.816	-36.7919	-37.1468	-38.2465
							1552.83	-36.0777	-36.1374	-36.1547	-36.1741	-36.1891	-36.2047	-36.2252	-36.2898	-36.2958	-36.3187	-36.3483	-36.4764	-36.4449	-36.7229	-36.811	-36.7872	-37.1403	-38.235
							1552.84	-36.0776	-36.137	-36.1542	-36.1733	-36.1882	-36.2036	-36.224	-36.2882	-36.294	-36.3154	-36.346	-36.4733	-36.4403	-36.7185	-36.806	-36.7826	-37.1339	-38.2236
							1552.85	-36.0774	-36.1365	-36.1537	-36.1726	-36.1873	-36.2025	-36.2228	-36.2865	-36.2922	-36.3121	-36.3438	-36.4702	-36.4357	-36.7141	-36.801	-36.7779	-37.1275	-38.2122
							1552.86	-36.0773	-36.1361	-36.1532	-36.1718	-36.1865	-36.2015	-36.2216	-36.2849	-36.2905	-36.3088	-36.3416	-36.4671	-36.4312	-36.7097	-36.7961	-36.7734	-37.1211	-38.2008
							1552.86	-36.0771	-36.1357	-36.1527	-36.1711	-36.1856	-36.2004	-36.2204	-36.2834	-36.2887	-36.3055	-36.3394	-36.4641	-36.4266	-36.7054	-36.7912	-36.7688	-37.1148	-38.1895
							1552.87	-36.077	-36.1353	-36.1522	-36.1704	-36.1848	-36.1993	-36.2192	-36.2818	-36.287	-36.3023	-36.3372	-36.4611	-36.4221	-36.7011	-36.7863	-36.7642	-37.1085	-38.1783
							1552.88	-36.0769	-36.135	-36.1518	-36.1697	-36.184	-36.1983	-36.2181	-36.2802	-36.2853	-36.299	-36.3351	-36.4581	-36.4177	-36.6968	-36.7814	-36.7597	-37.1022	-38.1671
							1552.89	-36.0768	-36.1346	-36.1513	-36.169	-36.1832	-36.1973	-36.2169	-36.2787	-36.2836	-36.2958	-36.333	-36.4551	-36.4132	-36.6925	-36.7766	-36.7552	-37.0959	-38.1559
							1552.9	-36.0767	-36.1343	-36.1509	-36.1684	-36.1825	-36.1963	-36.2158	-36.2772	-36.2819	-36.2927	-36.3308	-36.4521	-36.4088	-36.6883	-36.7718	-36.7507	-37.0897	-38.1448
							1552.9	-36.0767	-36.134	-36.1505	-36.1677	-36.1817	-36.1953	-36.2147	-36.2757	-36.2803	-36.2895	-36.3287	-36.4492	-36.4044	-36.684	-36.767	-36.7462	-37.0835	-38.1337
							1552.91	-36.0766	-36.1337	-36.1501	-36.1671	-36.181	-36.1943	-36.2136	-36.2742	-36.2786	-36.2864	-36.3266	-36.4462	-36.4	-36.6798	-36.7622	-36.7418	-37.0773	-38.1227
							1552.92	-36.0766	-36.1334	-36.1497	-36.1665	-36.1802	-36.1933	-36.2125	-36.2727	-36.277	-36.2833	-36.3246	-36.4433	-36.3957	-36.6757	-36.7575	-36.7373	-37.0712	-38.1118
							1552.93	-36.0766	-36.1331	-36.1493	-36.1659	-36.1795	-36.1924	-36.2114	-36.2713	-36.2754	-36.2802	-36.3225	-36.4404	-36.3913	-36.6715	-36.7528	-36.7329	-37.0651	-38.1008
							1552.94	-36.0766	-36.1329	-36.1489	-36.1653	-36.1788	-36.1915	-36.2104	-36.2698	-36.2738	-36.2771	-36.3205	-36.4375	-36.387	-36.6674	-36.7481	-36.7285	-37.059	-38.09
							1552.94	-36.0766	-36.1327	-36.1486	-36.1647	-36.1781	-36.1905	-36.2093	-36.2684	-36.2722	-36.2741	-36.3184	-36.4347	-36.3827	-36.6633	-36.7434	-36.7242	-37.0529	-38.0791
							1552.95	-36.0766	-36.1324	-36.1482	-36.1641	-36.1775	-36.1896	-36.2083	-36.267	-36.2706	-36.271	-36.3164	-36.4319	-36.3785	-36.6592	-36.7388	-36.7198	-37.0469	-38.0683
							1552.96	-36.0767	-36.1322	-36.1479	-36.1636	-36.1768	-36.1887	-36.2073	-36.2656	-36.2691	-36.268	-36.3145	-36.429	-36.3743	-36.6552	-36.7342	-36.7155	-37.0409	-38.0576
							1552.97	-36.0767	-36.1321	-36.1476	-36.1631	-36.1762	-36.1878	-36.2063	-36.2642	-36.2676	-36.265	-36.3125	-36.4262	-36.3701	-36.6511	-36.7296	-36.7112	-37.0349	-38.0469
							1552.98	-36.0768	-36.1319	-36.1473	-36.1625	-36.1755	-36.187	-36.2053	-36.2629	-36.266	-36.2621	-36.3105	-36.4235	-36.3659	-36.6471	-36.7251	-36.7069	-37.029	-38.0363
							1552.98	-36.0769	-36.1317	-36.147	-36.162	-36.1749	-36.1861	-36.2043	-36.2615	-36.2645	-36.2591	-36.3086	-36.4207	-36.3617	-36.6431	-36.7205	-36.7027	-37.0231	-38.0256
							1552.99	-36.0769	-36.1316	-36.1467	-36.1615	-36.1743	-36.1853	-36.2033	-36.2602	-36.2631	-36.2562	-36.3067	-36.418	-36.3576	-36.6392	-36.716	-36.6984	-37.0172	-38.0151
							1553	-36.0771	-36.1315	-36.1465	-36.1611	-36.1737	-36.1845	-36.2023	-36.2589	-36.2616	-36.2533	-36.3048	-36.4152	-36.3535	-36.6352	-36.7115	-36.6942	-37.0113	-38.0046
							1553.01	-36.0772	-36.1314	-36.1462	-36.1606	-36.1732	-36.1836	-36.2014	-36.2576	-36.2602	-36.2504	-36.3029	-36.4125	-36.3494	-36.6313	-36.7071	-36.69	-37.0055	-37.9941
							1553.02	-36.0773	-36.1313	-36.146	-36.1601	-36.1726	-36.1829	-36.2005	-36.2563	-36.2587	-36.2475	-36.301	-36.4099	-36.3453	-36.6274	-36.7026	-36.6858	-36.9996	-37.9837
							1553.02	-36.0775	-36.1312	-36.1457	-36.1597	-36.1721	-36.1821	-36.1996	-36.255	-36.2573	-36.2447	-36.2991	-36.4072	-36.3413	-36.6236	-36.6982	-36.6817	-36.9939	-37.9733
							1553.03	-36.0776	-36.1312	-36.1455	-36.1593	-36.1715	-36.1813	-36.1987	-36.2538	-36.2559	-36.2419	-36.2973	-36.4045	-36.3373	-36.6197	-36.6938	-36.6775	-36.9881	-37.963
							1553.04	-36.0778	-36.1311	-36.1453	-36.1589	-36.171	-36.1805	-36.1978	-36.2525	-36.2545	-36.2391	-36.2955	-36.4019	-36.3333	-36.6159	-36.6895	-36.6734	-36.9824	-37.9527
							1553.05	-36.078	-36.1311	-36.1451	-36.1585	-36.1705	-36.1798	-36.1969	-36.2513	-36.2531	-36.2363	-36.2937	-36.3993	-36.3294	-36.6121	-36.6851	-36.6693	-36.9767	-37.9424
							1553.06	-36.0782	-36.1311	-36.145	-36.1581	-36.17	-36.1791	-36.196	-36.2501	-36.2518	-36.2335	-36.2919	-36.3967	-36.3254	-36.6083	-36.6808	-36.6652	-36.971	-37.9322
							1553.06	-36.0784	-36.1311	-36.1448	-36.1577	-36.1695	-36.1784	-36.1952	-36.2489	-36.2505	-36.2308	-36.2901	-36.3941	-36.3215	-36.6046	-36.6765	-36.6612	-36.9653	-37.9221
							1553.07	-36.0787	-36.1311	-36.1447	-36.1574	-36.1691	-36.1777	-36.1944	-36.2477	-36.2491	-36.2281	-36.2883	-36.3916	-36.3176	-36.6009	-36.6723	-36.6571	-36.9597	-37.9119
							1553.08	-36.0789	-36.1312	-36.1445	-36.157	-36.1686	-36.177	-36.1935	-36.2466	-36.2478	-36.2254	-36.2866	-36.389	-36.3138	-36.5971	-36.668	-36.6531	-36.9541	-37.9019
							1553.09	-36.0792	-36.1312	-36.1444	-36.1567	-36.1682	-36.1763	-36.1927	-36.2454	-36.2465	-36.2227	-36.2849	-36.3865	-36.3099	-36.5935	-36.6638	-36.6491	-36.9485	-37.8918
							1553.1	-36.0795	-36.1313	-36.1443	-36.1564	-36.1677	-36.1757	-36.1919	-36.2443	-36.2453	-36.22	-36.2831	-36.384	-36.3061	-36.5898	-36.6596	-36.6451	-36.943	-37.8819
							1553.1	-36.0798	-36.1314	-36.1442	-36.1561	-36.1673	-36.175	-36.1912	-36.2432	-36.244	-36.2174	-36.2814	-36.3815	-36.3023	-36.5862	-36.6555	-36.6412	-36.9375	-37.8719
							1553.11	-36.0801	-36.1315	-36.1441	-36.1558	-36.1669	-36.1744	-36.1904	-36.2421	-36.2428	-36.2148	-36.2798	-36.3791	-36.2986	-36.5825	-36.6513	-36.6372	-36.932	-37.862
							1553.12	-36.0804	-36.1316	-36.144	-36.1555	-36.1666	-36.1738	-36.1896	-36.241	-36.2415	-36.2122	-36.2781	-36.3766	-36.2948	-36.579	-36.6472	-36.6333	-36.9265	-37.8522
							1553.13	-36.0807	-36.1318	-36.144	-36.1553	-36.1662	-36.1732	-36.1889	-36.2399	-36.2403	-36.2096	-36.2765	-36.3742	-36.2911	-36.5754	-36.6431	-36.6294	-36.921	-37.8424
							1553.14	-36.0811	-36.1319	-36.1439	-36.155	-36.1658	-36.1726	-36.1882	-36.2389	-36.2391	-36.2071	-36.2748	-36.3718	-36.2874	-36.5718	-36.639	-36.6256	-36.9156	-37.8326
							1553.14	-36.0814	-36.1321	-36.1439	-36.1548	-36.1655	-36.172	-36.1875	-36.2378	-36.2379	-36.2045	-36.2732	-36.3694	-36.2837	-36.5683	-36.635	-36.6217	-36.9102	-37.8229
							1553.15	-36.0818	-36.1323	-36.1439	-36.1546	-36.1652	-36.1715	-36.1868	-36.2368	-36.2368	-36.202	-36.2716	-36.367	-36.2801	-36.5648	-36.631	-36.6179	-36.9048	-37.8132
							1553.16	-36.0822	-36.1325	-36.1439	-36.1544	-36.1648	-36.1709	-36.1861	-36.2358	-36.2356	-36.1995	-36.27	-36.3647	-36.2765	-36.5613	-36.627	-36.614	-36.8995	-37.8036
							1553.17	-36.0826	-36.1327	-36.1439	-36.1542	-36.1645	-36.1704	-36.1854	-36.2348	-36.2345	-36.197	-36.2685	-36.3623	-36.2729	-36.5579	-36.623	-36.6103	-36.8942	-37.794
							1553.18	-36.083	-36.133	-36.1439	-36.154	-36.1642	-36.1699	-36.1848	-36.2338	-36.2334	-36.1946	-36.2669	-36.36	-36.2693	-36.5544	-36.619	-36.6065	-36.8889	-37.7844
							1553.18	-36.0834	-36.1332	-36.144	-36.1539	-36.164	-36.1694	-36.1841	-36.2328	-36.2323	-36.1921	-36.2654	-36.3577	-36.2658	-36.551	-36.6151	-36.6027	-36.8836	-37.7749
							1553.19	-36.0839	-36.1335	-36.144	-36.1537	-36.1637	-36.1689	-36.1835	-36.2319	-36.2312	-36.1897	-36.2638	-36.3555	-36.2622	-36.5476	-36.6112	-36.599	-36.8783	-37.7654
							1553.2	-36.0843	-36.1338	-36.1441	-36.1536	-36.1634	-36.1684	-36.1829	-36.2309	-36.2301	-36.1873	-36.2623	-36.3532	-36.2587	-36.5442	-36.6073	-36.5953	-36.8731	-37.756
							1553.21	-36.0848	-36.1341	-36.1441	-36.1535	-36.1632	-36.168	-36.1823	-36.23	-36.229	-36.185	-36.2608	-36.351	-36.2553	-36.5409	-36.6035	-36.5916	-36.8679	-37.7466
							1553.22	-36.0853	-36.1344	-36.1442	-36.1534	-36.163	-36.1675	-36.1817	-36.2291	-36.228	-36.1826	-36.2594	-36.3487	-36.2518	-36.5376	-36.5996	-36.5879	-36.8627	-37.7373
							1553.22	-36.0858	-36.1347	-36.1443	-36.1533	-36.1628	-36.1671	-36.1812	-36.2282	-36.2269	-36.1803	-36.2579	-36.3465	-36.2484	-36.5342	-36.5958	-36.5843	-36.8576	-37.728
							1553.23	-36.0863	-36.1351	-36.1445	-36.1532	-36.1626	-36.1667	-36.1806	-36.2273	-36.2259	-36.178	-36.2565	-36.3443	-36.245	-36.531	-36.592	-36.5806	-36.8524	-37.7187
							1553.24	-36.0868	-36.1355	-36.1446	-36.1532	-36.1624	-36.1663	-36.1801	-36.2264	-36.2249	-36.1757	-36.255	-36.3422	-36.2416	-36.5277	-36.5882	-36.577	-36.8473	-37.7095
							1553.25	-36.0874	-36.1358	-36.1447	-36.1531	-36.1622	-36.1659	-36.1795	-36.2256	-36.2239	-36.1734	-36.2536	-36.34	-36.2382	-36.5245	-36.5845	-36.5734	-36.8422	-37.7003
							1553.26	-36.0879	-36.1362	-36.1449	-36.1531	-36.1621	-36.1655	-36.179	-36.2247	-36.2229	-36.1711	-36.2522	-36.3379	-36.2349	-36.5212	-36.5808	-36.5699	-36.8372	-37.6912
							1553.26	-36.0885	-36.1367	-36.1451	-36.1531	-36.1619	-36.1652	-36.1785	-36.2239	-36.222	-36.1689	-36.2508	-36.3358	-36.2316	-36.518	-36.5771	-36.5663	-36.8321	-37.6821
							1553.27	-36.0891	-36.1371	-36.1452	-36.1531	-36.1618	-36.1648	-36.1781	-36.2231	-36.221	-36.1667	-36.2495	-36.3337	-36.2283	-36.5149	-36.5734	-36.5628	-36.8271	-37.6731
							1553.28	-36.0897	-36.1375	-36.1454	-36.1531	-36.1617	-36.1645	-36.1776	-36.2223	-36.2201	-36.1645	-36.2481	-36.3316	-36.2251	-36.5117	-36.5697	-36.5593	-36.8221	-37.6641
							1553.29	-36.0903	-36.138	-36.1457	-36.1531	-36.1616	-36.1642	-36.1771	-36.2215	-36.2192	-36.1623	-36.2468	-36.3295	-36.2218	-36.5086	-36.5661	-36.5558	-36.8172	-37.6551
							1553.3	-36.0909	-36.1385	-36.1459	-36.1532	-36.1615	-36.1639	-36.1767	-36.2207	-36.2183	-36.1602	-36.2455	-36.3275	-36.2186	-36.5054	-36.5625	-36.5523	-36.8122	-37.6462
							1553.3	-36.0916	-36.139	-36.1461	-36.1532	-36.1614	-36.1636	-36.1763	-36.22	-36.2174	-36.158	-36.2442	-36.3255	-36.2154	-36.5024	-36.5589	-36.5489	-36.8073	-37.6373
							1553.31	-36.0922	-36.1395	-36.1464	-36.1533	-36.1614	-36.1633	-36.1759	-36.2192	-36.2165	-36.1559	-36.2429	-36.3234	-36.2123	-36.4993	-36.5553	-36.5454	-36.8024	-37.6284
							1553.32	-36.0929	-36.14	-36.1466	-36.1534	-36.1613	-36.1631	-36.1755	-36.2185	-36.2156	-36.1538	-36.2416	-36.3215	-36.2091	-36.4962	-36.5518	-36.542	-36.7975	-37.6196
							1553.33	-36.0936	-36.1406	-36.1469	-36.1535	-36.1613	-36.1629	-36.1751	-36.2178	-36.2148	-36.1518	-36.2403	-36.3195	-36.206	-36.4932	-36.5483	-36.5387	-36.7927	-37.6109
							1553.34	-36.0943	-36.1412	-36.1472	-36.1536	-36.1612	-36.1626	-36.1747	-36.2171	-36.2139	-36.1497	-36.2391	-36.3175	-36.2029	-36.4902	-36.5448	-36.5353	-36.7879	-37.6021
							1553.34	-36.095	-36.1417	-36.1475	-36.1537	-36.1612	-36.1624	-36.1744	-36.2164	-36.2131	-36.1477	-36.2378	-36.3156	-36.1998	-36.4872	-36.5413	-36.5319	-36.7831	-37.5934
							1553.35	-36.0957	-36.1423	-36.1479	-36.1539	-36.1612	-36.1622	-36.1741	-36.2157	-36.2123	-36.1457	-36.2366	-36.3137	-36.1968	-36.4842	-36.5378	-36.5286	-36.7783	-37.5848
							1553.36	-36.0965	-36.143	-36.1482	-36.154	-36.1613	-36.162	-36.1737	-36.2151	-36.2115	-36.1437	-36.2354	-36.3118	-36.1938	-36.4813	-36.5344	-36.5253	-36.7735	-37.5762
							1553.37	-36.0972	-36.1436	-36.1485	-36.1542	-36.1613	-36.1619	-36.1734	-36.2144	-36.2107	-36.1417	-36.2342	-36.3099	-36.1908	-36.4784	-36.531	-36.522	-36.7688	-37.5676
							1553.38	-36.098	-36.1442	-36.1489	-36.1544	-36.1613	-36.1617	-36.1732	-36.2138	-36.21	-36.1398	-36.2331	-36.308	-36.1878	-36.4754	-36.5276	-36.5188	-36.7641	-37.5591
							1553.38	-36.0988	-36.1449	-36.1493	-36.1546	-36.1614	-36.1616	-36.1729	-36.2132	-36.2092	-36.1379	-36.2319	-36.3062	-36.1848	-36.4726	-36.5242	-36.5155	-36.7594	-37.5506
							1553.39	-36.0996	-36.1456	-36.1497	-36.1548	-36.1615	-36.1615	-36.1726	-36.2126	-36.2085	-36.1359	-36.2308	-36.3044	-36.1819	-36.4697	-36.5209	-36.5123	-36.7547	-37.5422
							1553.4	-36.1004	-36.1463	-36.1501	-36.155	-36.1616	-36.1614	-36.1724	-36.212	-36.2077	-36.1341	-36.2296	-36.3025	-36.179	-36.4669	-36.5175	-36.5091	-36.7501	-37.5338
							1553.41	-36.1012	-36.147	-36.1505	-36.1553	-36.1617	-36.1613	-36.1721	-36.2114	-36.207	-36.1322	-36.2285	-36.3008	-36.1761	-36.464	-36.5142	-36.5059	-36.7454	-37.5254
							1553.42	-36.102	-36.1477	-36.1509	-36.1555	-36.1618	-36.1612	-36.1719	-36.2108	-36.2063	-36.1304	-36.2274	-36.299	-36.1733	-36.4612	-36.5109	-36.5027	-36.7408	-37.5171
							1553.42	-36.1029	-36.1485	-36.1514	-36.1558	-36.1619	-36.1611	-36.1717	-36.2103	-36.2056	-36.1285	-36.2263	-36.2972	-36.1704	-36.4584	-36.5077	-36.4996	-36.7363	-37.5088
							1553.43	-36.1037	-36.1493	-36.1519	-36.1561	-36.1621	-36.1611	-36.1715	-36.2098	-36.2049	-36.1267	-36.2253	-36.2955	-36.1676	-36.4557	-36.5044	-36.4964	-36.7317	-37.5005
							1553.44	-36.1046	-36.15	-36.1523	-36.1564	-36.1622	-36.1611	-36.1714	-36.2092	-36.2043	-36.1249	-36.2242	-36.2937	-36.1649	-36.4529	-36.5012	-36.4933	-36.7272	-37.4923
							1553.45	-36.1055	-36.1508	-36.1528	-36.1567	-36.1624	-36.161	-36.1712	-36.2087	-36.2036	-36.1232	-36.2232	-36.292	-36.1621	-36.4502	-36.498	-36.4902	-36.7227	-37.4841
							1553.46	-36.1064	-36.1516	-36.1533	-36.157	-36.1626	-36.161	-36.1711	-36.2082	-36.203	-36.1214	-36.2221	-36.2904	-36.1594	-36.4475	-36.4948	-36.4872	-36.7182	-37.476
							1553.46	-36.1073	-36.1525	-36.1539	-36.1573	-36.1628	-36.161	-36.171	-36.2078	-36.2024	-36.1197	-36.2211	-36.2887	-36.1566	-36.4448	-36.4917	-36.4841	-36.7137	-37.4679
							1553.47	-36.1083	-36.1533	-36.1544	-36.1577	-36.163	-36.1611	-36.1708	-36.2073	-36.2017	-36.118	-36.2201	-36.287	-36.154	-36.4422	-36.4885	-36.4811	-36.7093	-37.4598
							1553.48	-36.1092	-36.1542	-36.1549	-36.1581	-36.1632	-36.1611	-36.1707	-36.2068	-36.2011	-36.1163	-36.2191	-36.2854	-36.1513	-36.4395	-36.4854	-36.4781	-36.7049	-37.4518
							1553.49	-36.1102	-36.1551	-36.1555	-36.1584	-36.1634	-36.1612	-36.1707	-36.2064	-36.2006	-36.1147	-36.2182	-36.2838	-36.1486	-36.4369	-36.4823	-36.4751	-36.7005	-37.4438
							1553.5	-36.1112	-36.156	-36.1561	-36.1588	-36.1637	-36.1612	-36.1706	-36.206	-36.2	-36.113	-36.2172	-36.2822	-36.146	-36.4343	-36.4793	-36.4721	-36.6961	-37.4359
							1553.5	-36.1121	-36.1569	-36.1567	-36.1592	-36.164	-36.1613	-36.1705	-36.2055	-36.1994	-36.1114	-36.2162	-36.2806	-36.1434	-36.4317	-36.4762	-36.4692	-36.6918	-37.428
							1553.51	-36.1131	-36.1578	-36.1573	-36.1597	-36.1642	-36.1614	-36.1705	-36.2051	-36.1989	-36.1098	-36.2153	-36.279	-36.1409	-36.4291	-36.4732	-36.4662	-36.6875	-37.4201
							1553.52	-36.1142	-36.1588	-36.1579	-36.1601	-36.1645	-36.1615	-36.1705	-36.2048	-36.1984	-36.1082	-36.2144	-36.2774	-36.1383	-36.4266	-36.4702	-36.4633	-36.6832	-37.4123
							1553.53	-36.1152	-36.1598	-36.1585	-36.1606	-36.1649	-36.1617	-36.1705	-36.2044	-36.1978	-36.1067	-36.2135	-36.2759	-36.1358	-36.4241	-36.4672	-36.4604	-36.6789	-37.4045
							1553.54	-36.1162	-36.1607	-36.1592	-36.161	-36.1652	-36.1618	-36.1705	-36.204	-36.1973	-36.1051	-36.2126	-36.2744	-36.1333	-36.4216	-36.4642	-36.4575	-36.6746	-37.3967
							1553.54	-36.1173	-36.1617	-36.1599	-36.1615	-36.1655	-36.162	-36.1705	-36.2037	-36.1968	-36.1036	-36.2117	-36.2729	-36.1308	-36.4191	-36.4612	-36.4547	-36.6704	-37.389
							1553.55	-36.1184	-36.1628	-36.1605	-36.162	-36.1659	-36.1621	-36.1705	-36.2033	-36.1963	-36.1021	-36.2109	-36.2714	-36.1283	-36.4166	-36.4583	-36.4519	-36.6662	-37.3813
							1553.56	-36.1195	-36.1638	-36.1612	-36.1625	-36.1662	-36.1623	-36.1706	-36.203	-36.1959	-36.1006	-36.21	-36.2699	-36.1259	-36.4142	-36.4554	-36.449	-36.662	-37.3736
							1553.57	-36.1206	-36.1649	-36.1619	-36.163	-36.1666	-36.1625	-36.1706	-36.2027	-36.1954	-36.0992	-36.2092	-36.2684	-36.1235	-36.4117	-36.4525	-36.4462	-36.6578	-37.366
							1553.58	-36.1217	-36.1659	-36.1627	-36.1636	-36.167	-36.1627	-36.1707	-36.2024	-36.195	-36.0977	-36.2084	-36.267	-36.1211	-36.4093	-36.4496	-36.4434	-36.6537	-37.3585
							1553.58	-36.1228	-36.167	-36.1634	-36.1641	-36.1674	-36.163	-36.1708	-36.2022	-36.1946	-36.0963	-36.2076	-36.2656	-36.1187	-36.4069	-36.4468	-36.4407	-36.6495	-37.3509
							1553.59	-36.124	-36.1681	-36.1642	-36.1647	-36.1679	-36.1632	-36.1709	-36.2019	-36.1941	-36.0949	-36.2068	-36.2642	-36.1164	-36.4046	-36.444	-36.4379	-36.6454	-37.3434
							1553.6	-36.1251	-36.1692	-36.1649	-36.1652	-36.1683	-36.1635	-36.171	-36.2016	-36.1937	-36.0935	-36.206	-36.2628	-36.1141	-36.4022	-36.4412	-36.4352	-36.6414	-37.336
							1553.61	-36.1263	-36.1704	-36.1657	-36.1658	-36.1688	-36.1637	-36.1712	-36.2014	-36.1934	-36.0922	-36.2053	-36.2614	-36.1118	-36.3999	-36.4384	-36.4325	-36.6373	-37.3285
							1553.62	-36.1275	-36.1715	-36.1665	-36.1664	-36.1692	-36.164	-36.1713	-36.2012	-36.193	-36.0909	-36.2045	-36.26	-36.1095	-36.3976	-36.4356	-36.4298	-36.6333	-37.3211
							1553.62	-36.1287	-36.1727	-36.1673	-36.1671	-36.1697	-36.1643	-36.1715	-36.201	-36.1926	-36.0895	-36.2038	-36.2587	-36.1073	-36.3953	-36.4328	-36.4271	-36.6293	-37.3138
							1553.63	-36.1299	-36.1739	-36.1681	-36.1677	-36.1702	-36.1646	-36.1716	-36.2008	-36.1923	-36.0882	-36.203	-36.2573	-36.105	-36.393	-36.4301	-36.4245	-36.6253	-37.3065
							1553.64	-36.1311	-36.1751	-36.169	-36.1683	-36.1707	-36.165	-36.1718	-36.2006	-36.1919	-36.087	-36.2023	-36.256	-36.1028	-36.3908	-36.4274	-36.4218	-36.6213	-37.2992
							1553.65	-36.1324	-36.1763	-36.1698	-36.169	-36.1712	-36.1653	-36.172	-36.2004	-36.1916	-36.0857	-36.2016	-36.2547	-36.1007	-36.3885	-36.4247	-36.4192	-36.6174	-37.2919
							1553.66	-36.1336	-36.1776	-36.1707	-36.1697	-36.1718	-36.1657	-36.1722	-36.2003	-36.1913	-36.0845	-36.201	-36.2534	-36.0985	-36.3863	-36.4221	-36.4166	-36.6134	-37.2847
							1553.66	-36.1349	-36.1788	-36.1716	-36.1704	-36.1723	-36.166	-36.1725	-36.2001	-36.191	-36.0833	-36.2003	-36.2522	-36.0964	-36.3841	-36.4194	-36.414	-36.6095	-37.2775
							1553.67	-36.1362	-36.1801	-36.1725	-36.1711	-36.1729	-36.1664	-36.1727	-36.2	-36.1907	-36.0821	-36.1997	-36.2509	-36.0942	-36.3819	-36.4168	-36.4115	-36.6056	-37.2704
							1553.68	-36.1375	-36.1814	-36.1734	-36.1718	-36.1735	-36.1668	-36.173	-36.1999	-36.1904	-36.0809	-36.199	-36.2497	-36.0922	-36.3798	-36.4142	-36.4089	-36.6018	-37.2633
							1553.69	-36.1388	-36.1827	-36.1743	-36.1725	-36.1741	-36.1672	-36.1732	-36.1998	-36.1902	-36.0798	-36.1984	-36.2485	-36.0901	-36.3776	-36.4116	-36.4064	-36.598	-37.2562
							1553.7	-36.1401	-36.1841	-36.1753	-36.1732	-36.1747	-36.1676	-36.1735	-36.1997	-36.1899	-36.0787	-36.1978	-36.2473	-36.088	-36.3755	-36.409	-36.4039	-36.5941	-37.2492
							1553.7	-36.1415	-36.1854	-36.1762	-36.174	-36.1753	-36.1681	-36.1738	-36.1996	-36.1897	-36.0775	-36.1972	-36.2461	-36.086	-36.3734	-36.4064	-36.4014	-36.5904	-37.2422
							1553.71	-36.1428	-36.1868	-36.1772	-36.1748	-36.176	-36.1685	-36.1741	-36.1996	-36.1895	-36.0765	-36.1966	-36.2449	-36.084	-36.3713	-36.4039	-36.3989	-36.5866	-37.2352
							1553.72	-36.1442	-36.1882	-36.1782	-36.1756	-36.1766	-36.169	-36.1745	-36.1995	-36.1893	-36.0754	-36.196	-36.2437	-36.082	-36.3693	-36.4014	-36.3964	-36.5828	-37.2283
							1553.73	-36.1456	-36.1896	-36.1792	-36.1764	-36.1773	-36.1695	-36.1748	-36.1995	-36.1891	-36.0744	-36.1955	-36.2426	-36.0801	-36.3672	-36.3989	-36.394	-36.5791	-37.2214
							1553.74	-36.147	-36.191	-36.1802	-36.1772	-36.178	-36.17	-36.1752	-36.1995	-36.1889	-36.0733	-36.1949	-36.2414	-36.0781	-36.3652	-36.3964	-36.3916	-36.5754	-37.2145
							1553.74	-36.1484	-36.1924	-36.1812	-36.178	-36.1787	-36.1705	-36.1755	-36.1995	-36.1888	-36.0723	-36.1944	-36.2403	-36.0762	-36.3632	-36.394	-36.3891	-36.5717	-37.2077
							1553.75	-36.1498	-36.1939	-36.1823	-36.1788	-36.1794	-36.171	-36.1759	-36.1995	-36.1886	-36.0713	-36.1939	-36.2392	-36.0743	-36.3612	-36.3916	-36.3867	-36.5681	-37.2009
							1553.76	-36.1513	-36.1954	-36.1833	-36.1797	-36.1801	-36.1716	-36.1763	-36.1995	-36.1885	-36.0704	-36.1934	-36.2381	-36.0725	-36.3592	-36.3891	-36.3844	-36.5644	-37.1941
							1553.77	-36.1527	-36.1969	-36.1844	-36.1806	-36.1809	-36.1721	-36.1767	-36.1996	-36.1884	-36.0694	-36.1929	-36.2371	-36.0706	-36.3573	-36.3867	-36.382	-36.5608	-37.1874
							1553.78	-36.1542	-36.1984	-36.1855	-36.1814	-36.1817	-36.1727	-36.1771	-36.1996	-36.1883	-36.0685	-36.1924	-36.236	-36.0688	-36.3553	-36.3844	-36.3797	-36.5572	-37.1807
							1553.78	-36.1557	-36.1999	-36.1866	-36.1823	-36.1824	-36.1733	-36.1775	-36.1997	-36.1882	-36.0676	-36.192	-36.235	-36.067	-36.3534	-36.382	-36.3773	-36.5536	-37.1741
							1553.79	-36.1572	-36.2015	-36.1877	-36.1832	-36.1832	-36.1739	-36.178	-36.1998	-36.1881	-36.0667	-36.1915	-36.2339	-36.0652	-36.3515	-36.3797	-36.375	-36.5501	-37.1675
							1553.8	-36.1587	-36.203	-36.1889	-36.1842	-36.184	-36.1745	-36.1784	-36.1999	-36.188	-36.0659	-36.1911	-36.2329	-36.0634	-36.3496	-36.3774	-36.3727	-36.5466	-37.1609
							1553.81	-36.1603	-36.2046	-36.19	-36.1851	-36.1848	-36.1751	-36.1789	-36.2	-36.188	-36.0651	-36.1907	-36.2319	-36.0617	-36.3478	-36.3751	-36.3705	-36.543	-37.1543
							1553.82	-36.1618	-36.2062	-36.1912	-36.1861	-36.1857	-36.1757	-36.1794	-36.2001	-36.1879	-36.0642	-36.1903	-36.2309	-36.06	-36.3459	-36.3728	-36.3682	-36.5396	-37.1478
							1553.82	-36.1634	-36.2078	-36.1923	-36.187	-36.1865	-36.1764	-36.1799	-36.2002	-36.1879	-36.0634	-36.1899	-36.23	-36.0583	-36.3441	-36.3705	-36.366	-36.5361	-37.1413
							1553.83	-36.1649	-36.2095	-36.1935	-36.188	-36.1874	-36.177	-36.1804	-36.2004	-36.1879	-36.0627	-36.1895	-36.229	-36.0566	-36.3423	-36.3683	-36.3637	-36.5327	-37.1349
							1553.84	-36.1665	-36.2111	-36.1947	-36.189	-36.1883	-36.1777	-36.1809	-36.2006	-36.1879	-36.0619	-36.1892	-36.2281	-36.0549	-36.3405	-36.3661	-36.3615	-36.5292	-37.1285
							1553.85	-36.1681	-36.2128	-36.196	-36.19	-36.1892	-36.1784	-36.1814	-36.2007	-36.1879	-36.0612	-36.1888	-36.2271	-36.0533	-36.3388	-36.3639	-36.3593	-36.5258	-37.1221
							1553.86	-36.1698	-36.2145	-36.1972	-36.191	-36.1901	-36.1791	-36.182	-36.2009	-36.188	-36.0605	-36.1885	-36.2262	-36.0517	-36.337	-36.3617	-36.3572	-36.5224	-37.1157
							1553.86	-36.1714	-36.2162	-36.1984	-36.1921	-36.191	-36.1798	-36.1826	-36.2011	-36.188	-36.0598	-36.1882	-36.2253	-36.0501	-36.3353	-36.3595	-36.355	-36.5191	-37.1094
							1553.87	-36.1731	-36.218	-36.1997	-36.1931	-36.1919	-36.1806	-36.1831	-36.2014	-36.1881	-36.0591	-36.1879	-36.2245	-36.0485	-36.3336	-36.3574	-36.3529	-36.5158	-37.1031
							1553.88	-36.1747	-36.2197	-36.201	-36.1942	-36.1929	-36.1813	-36.1837	-36.2016	-36.1882	-36.0585	-36.1876	-36.2236	-36.0469	-36.3319	-36.3552	-36.3507	-36.5124	-37.0969
							1553.89	-36.1764	-36.2215	-36.2023	-36.1953	-36.1939	-36.1821	-36.1843	-36.2019	-36.1882	-36.0578	-36.1873	-36.2227	-36.0454	-36.3302	-36.3531	-36.3486	-36.5091	-37.0907
							1553.9	-36.1781	-36.2233	-36.2036	-36.1964	-36.1949	-36.1829	-36.1849	-36.2021	-36.1884	-36.0572	-36.1871	-36.2219	-36.0439	-36.3285	-36.3511	-36.3465	-36.5059	-37.0845
							1553.9	-36.1798	-36.2251	-36.2049	-36.1975	-36.1959	-36.1836	-36.1855	-36.2024	-36.1885	-36.0566	-36.1868	-36.2211	-36.0424	-36.3269	-36.349	-36.3445	-36.5026	-37.0784
							1553.91	-36.1815	-36.2269	-36.2062	-36.1986	-36.1969	-36.1844	-36.1862	-36.2027	-36.1886	-36.0561	-36.1866	-36.2203	-36.0409	-36.3253	-36.3469	-36.3424	-36.4994	-37.0723
							1553.92	-36.1833	-36.2288	-36.2076	-36.1998	-36.1979	-36.1853	-36.1868	-36.203	-36.1888	-36.0555	-36.1864	-36.2195	-36.0395	-36.3237	-36.3449	-36.3403	-36.4962	-37.0662
							1553.93	-36.185	-36.2306	-36.209	-36.2009	-36.1989	-36.1861	-36.1875	-36.2033	-36.1889	-36.055	-36.1862	-36.2187	-36.038	-36.3221	-36.3429	-36.3383	-36.493	-37.0601
							1553.94	-36.1868	-36.2325	-36.2103	-36.2021	-36.2	-36.1869	-36.1882	-36.2037	-36.1891	-36.0545	-36.186	-36.2179	-36.0366	-36.3205	-36.3409	-36.3363	-36.4898	-37.0541
							1553.94	-36.1886	-36.2344	-36.2117	-36.2033	-36.2011	-36.1878	-36.1889	-36.204	-36.1893	-36.054	-36.1858	-36.2172	-36.0352	-36.3189	-36.3389	-36.3343	-36.4867	-37.0481
							1553.95	-36.1904	-36.2363	-36.2131	-36.2045	-36.2022	-36.1887	-36.1896	-36.2044	-36.1895	-36.0536	-36.1856	-36.2165	-36.0339	-36.3174	-36.337	-36.3323	-36.4836	-37.0422
							1553.96	-36.1922	-36.2383	-36.2146	-36.2057	-36.2033	-36.1895	-36.1903	-36.2048	-36.1897	-36.0531	-36.1855	-36.2157	-36.0325	-36.3159	-36.335	-36.3304	-36.4804	-37.0363
							1553.97	-36.1941	-36.2402	-36.216	-36.2069	-36.2044	-36.1904	-36.191	-36.2052	-36.19	-36.0527	-36.1854	-36.215	-36.0312	-36.3144	-36.3331	-36.3284	-36.4774	-37.0304
							1553.98	-36.1959	-36.2422	-36.2175	-36.2081	-36.2055	-36.1914	-36.1917	-36.2056	-36.1902	-36.0523	-36.1852	-36.2143	-36.0299	-36.3129	-36.3312	-36.3265	-36.4743	-37.0246
							1553.98	-36.1978	-36.2442	-36.2189	-36.2094	-36.2067	-36.1923	-36.1925	-36.206	-36.1905	-36.0519	-36.1851	-36.2137	-36.0286	-36.3115	-36.3294	-36.3246	-36.4713	-37.0187
							1553.99	-36.1997	-36.2462	-36.2204	-36.2107	-36.2078	-36.1932	-36.1933	-36.2065	-36.1908	-36.0516	-36.185	-36.213	-36.0273	-36.31	-36.3275	-36.3227	-36.4682	-37.013
							1554	-36.2016	-36.2483	-36.2219	-36.2119	-36.209	-36.1942	-36.194	-36.2069	-36.1911	-36.0512	-36.185	-36.2124	-36.0261	-36.3086	-36.3257	-36.3208	-36.4652	-37.0072

## Sheet: Repeatability measurement
	Fig 8
	Number of measurements	Linear fit (nm)	Minima (nm)	Error (nm)
	1	1550.01	1550.01	0.00449816
	2	1550.01	1550	0.00449816
	3	1550.01	1550.02	0.00449816
	4	1550.01	1550.01	0.00449816
	5	1550.01	1550.01	0.00449816
	6	1550.01	1550	0.00449816
	7	1550.01	1550.01	0.00449816
	8	1550.01	1550	0.00449816
	9	1550.01	1550.01	0.00449816
	10	1550.01	1550.01	0.00449816
	11	1550.01	1550	0.00449816
	12	1550.01	1550	0.00449816
	13	1550.01	1550.01	0.00449816
	14	1550.01	1550	0.00449816
	15	1550.01	1550	0.00449816
	16	1550.01	1550.01	0.00449816
	17	1550.01	1550.01	0.00449816
	18	1550.01	1550.01	0.00449816
	19	1550.01	1550	0.00449816
	20	1550.01	1550.01	0.00449816
	21	1550.01	1550	0.00449816
	22	1550.01	1550.01	0.00449816
	23	1550.01	1550.01	0.00449816
	24	1550	1550.01	0.00449816
	25	1550	1550.01	0.00449816
	26	1550	1550.01	0.00449816
	27	1550	1550	0.00449816
	28	1550	1550	0.00449816
	29	1550	1550.01	0.00449816
	30	1550	1550	0.00449816
	31	1550	1550	0.00449816
	32	1550	1550	0.00449816
	33	1550	1550.01	0.00449816
	34	1550	1550.01	0.00449816
	35	1550	1550	0.00449816
	36	1550	1550	0.00449816
	37	1550	1550	0.00449816
	38	1550	1550	0.00449816
	39	1550	1550	0.00449816
	40	1550	1550.01	0.00449816
	41	1550	1550	0.00449816
	42	1550	1550	0.00449816
	43	1550	1550	0.00449816
	44	1550	1550.01	0.00449816
	45	1550	1550	0.00449816
	46	1550	1550	0.00449816
	47	1550	1550	0.00449816
	48	1550	1550	0.00449816
	49	1550	1549.99	0.00449816
	50	1550	1550	0.00449816
	51	1550	1550	0.00449816
	52	1550	1550.01	0.00449816
	53	1550	1550	0.00449816
	54	1550	1549.99	0.00449816
	55	1550	1550	0.00449816
	56	1550	1550	0.00449816
	57	1550	1549.99	0.00449816
	58	1550	1550.01	0.00449816
	59	1550	1550	0.00449816
	60	1550	1550	0.00449816
	61	1550	1550	0.00449816
	62	1550	1550.01	0.00449816
	63	1550	1550	0.00449816
	64	1550	1549.99	0.00449816
	65	1550	1549.99	0.00449816
	66	1550	1550	0.00449816
	67	1550	1549.99	0.00449816
	68	1550	1549.99	0.00449816
	69	1550	1550	0.00449816
	70	1550	1549.99	0.00449816
	71	1550	1549.99	0.00449816
	72	1550	1550	0.00449816
	73	1550	1550	0.00449816
	74	1550	1549.99	0.00449816
	75	1549.99	1549.99	0.00449816
	76	1549.99	1549.99	0.00449816
	77	1549.99	1549.99	0.00449816
	78	1549.99	1550	0.00449816
	79	1549.99	1549.99	0.00449816
	80	1549.99	1549.99	0.00449816
	81	1549.99	1549.99	0.00449816
	82	1549.99	1550	0.00449816
	83	1549.99	1549.99	0.00449816
	84	1549.99	1549.99	0.00449816
	85	1549.99	1550	0.00449816
	86	1549.99	1549.99	0.00449816
	87	1549.99	1549.99	0.00449816
	88	1549.99	1549.99	0.00449816
	89	1549.99	1549.99	0.00449816
	90	1549.99	1549.98	0.00449816
	91	1549.99	1550	0.00449816
	92	1549.99	1549.99	0.00449816
	93	1549.99	1550	0.00449816
	94	1549.99	1550	0.00449816
	95	1549.99	1550	0.00449816
	96	1549.99	1549.99	0.00449816
	97	1549.99	1549.98	0.00449816
	98	1549.99	1549.98	0.00449816
	99	1549.99	1549.99	0.00449816
	100	1549.99	1549.98	0.00449816
